# Supplementary material
Source: PubMed Central journal article supplement (PMC4817229)
Supplement: NIHMS67207-supplement-Supplementary_Figure_8.pdf [file NIHMS67207-supplement-Supplementary_Figure_8.pdf]

**A** Spotted Gar Linkage Group 1

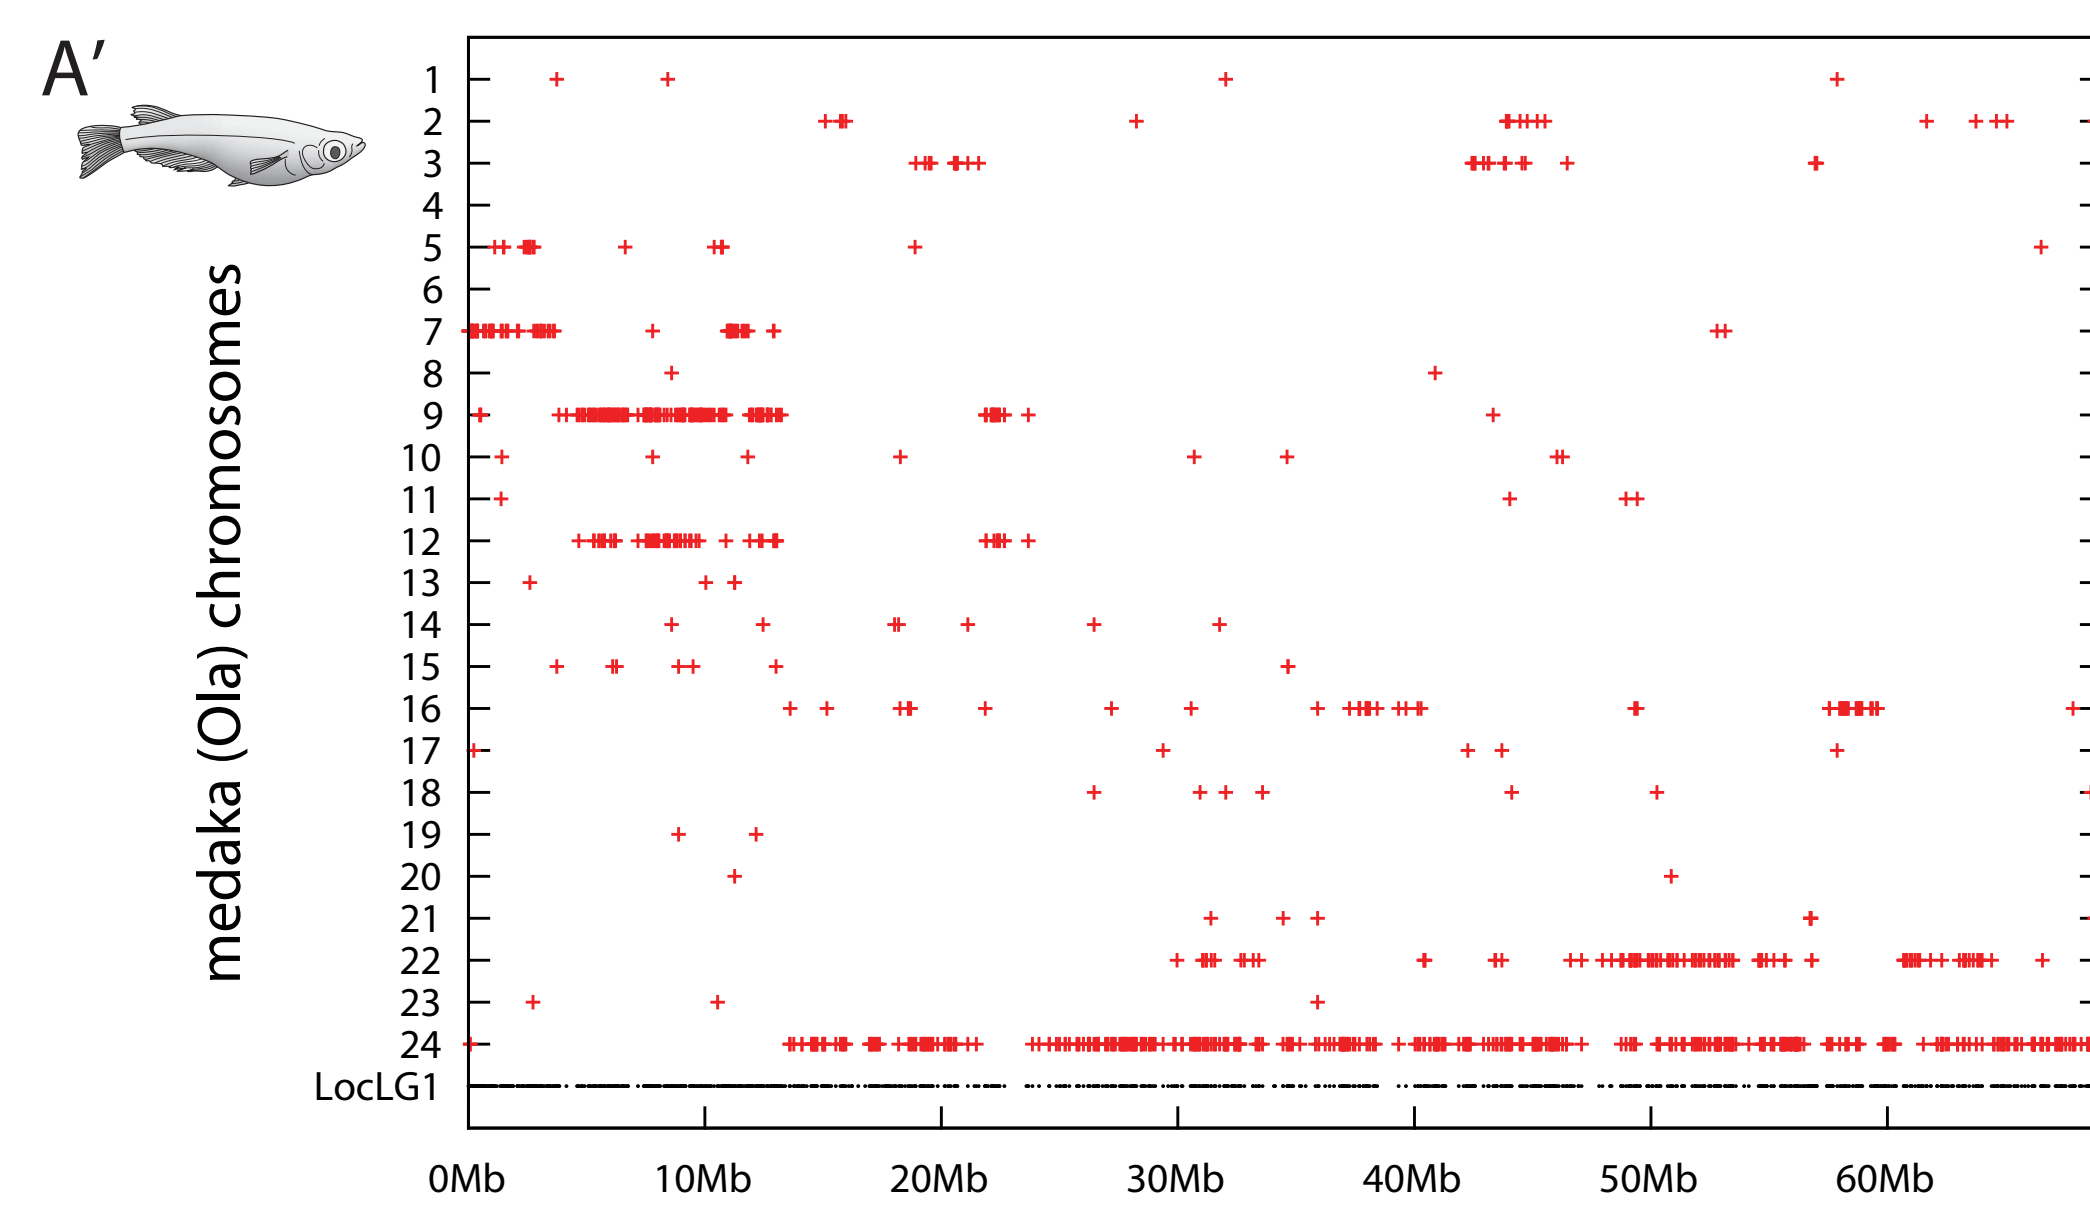

**B** Spotted Gar Linkage Group 2

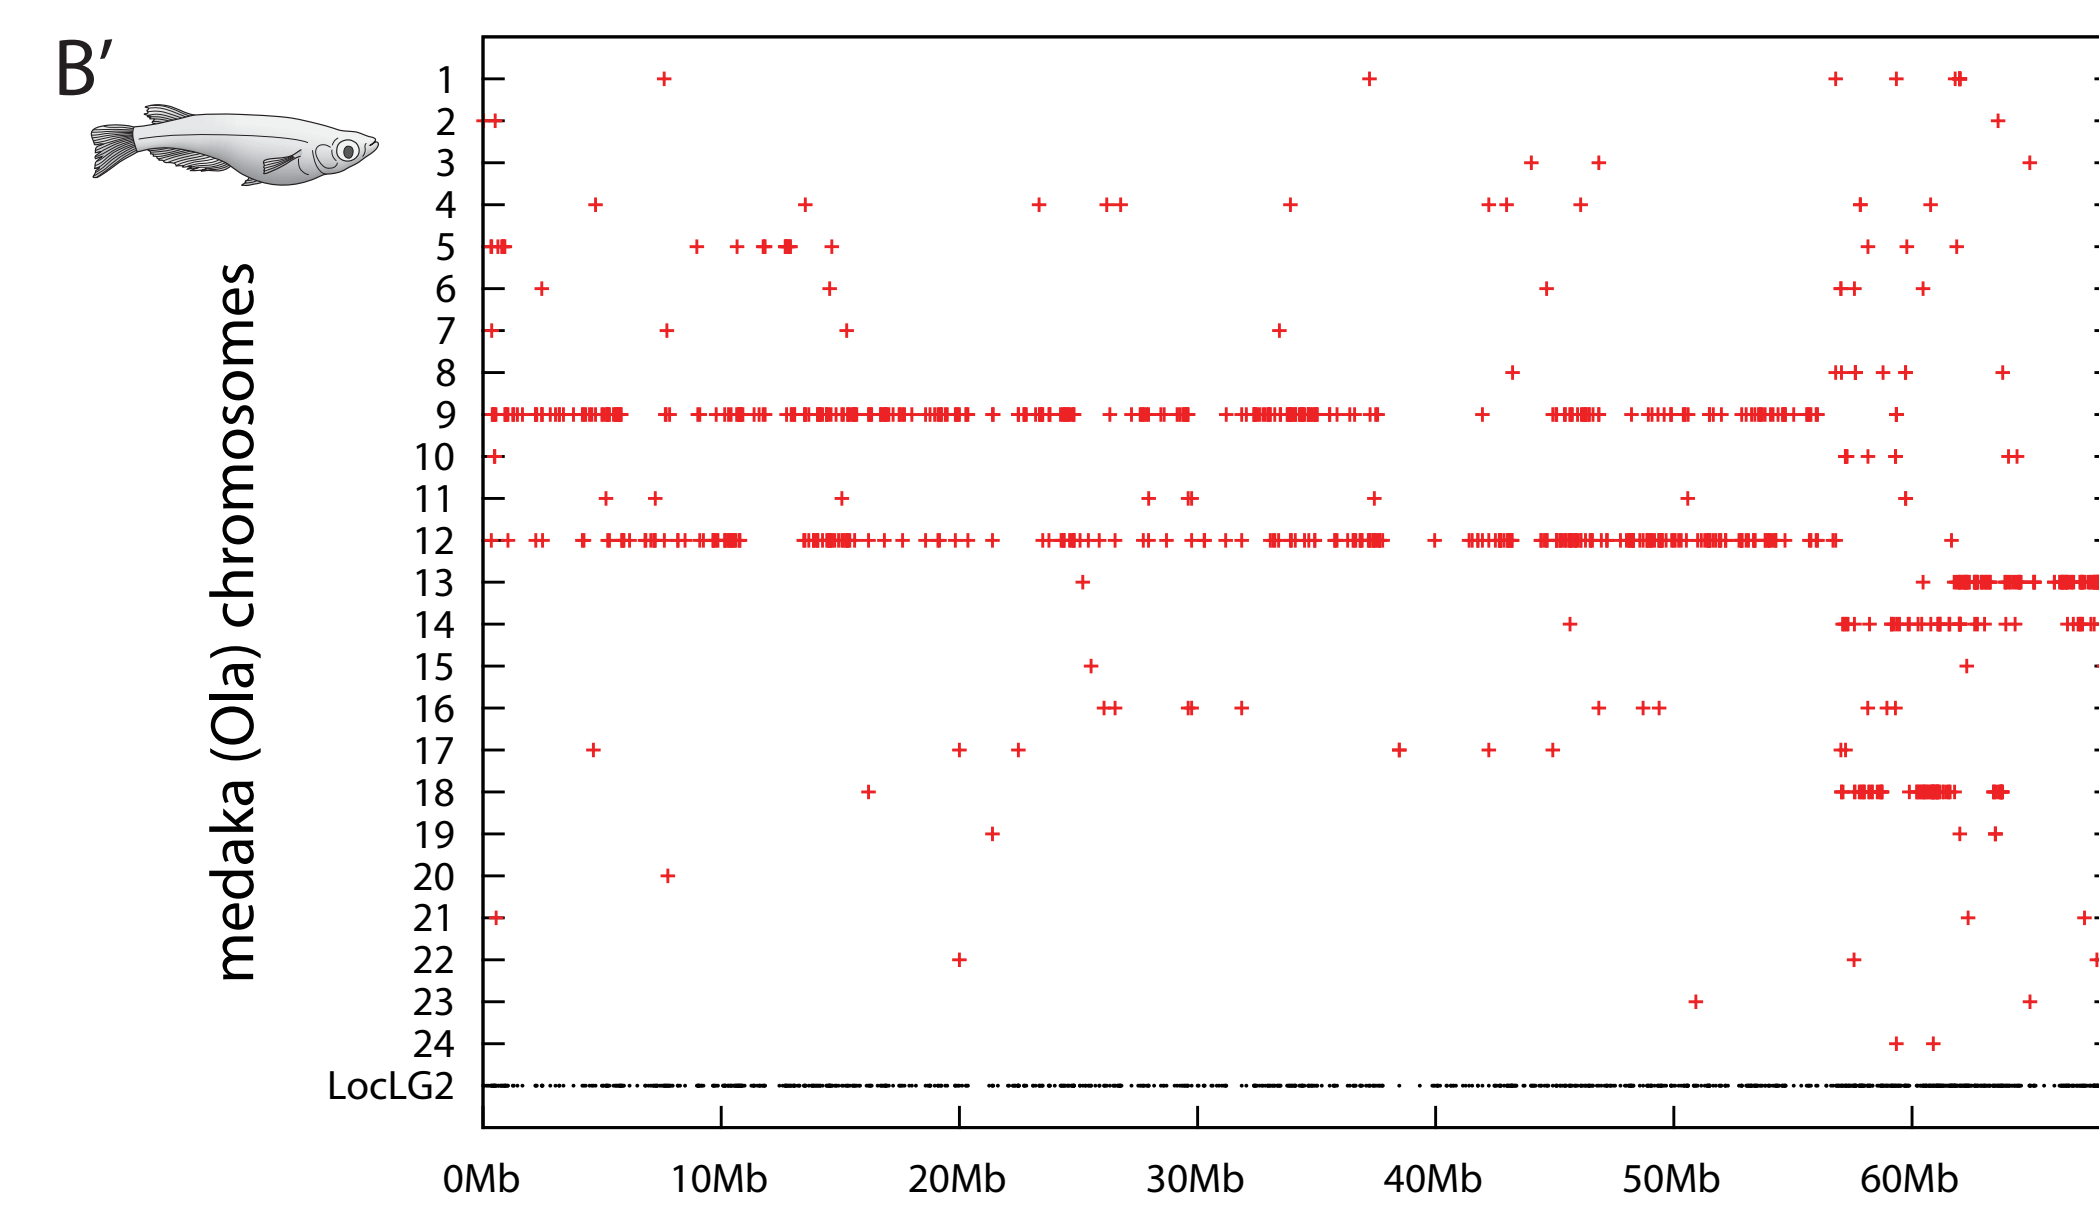

**C** Spotted Gar Linkage Group 3

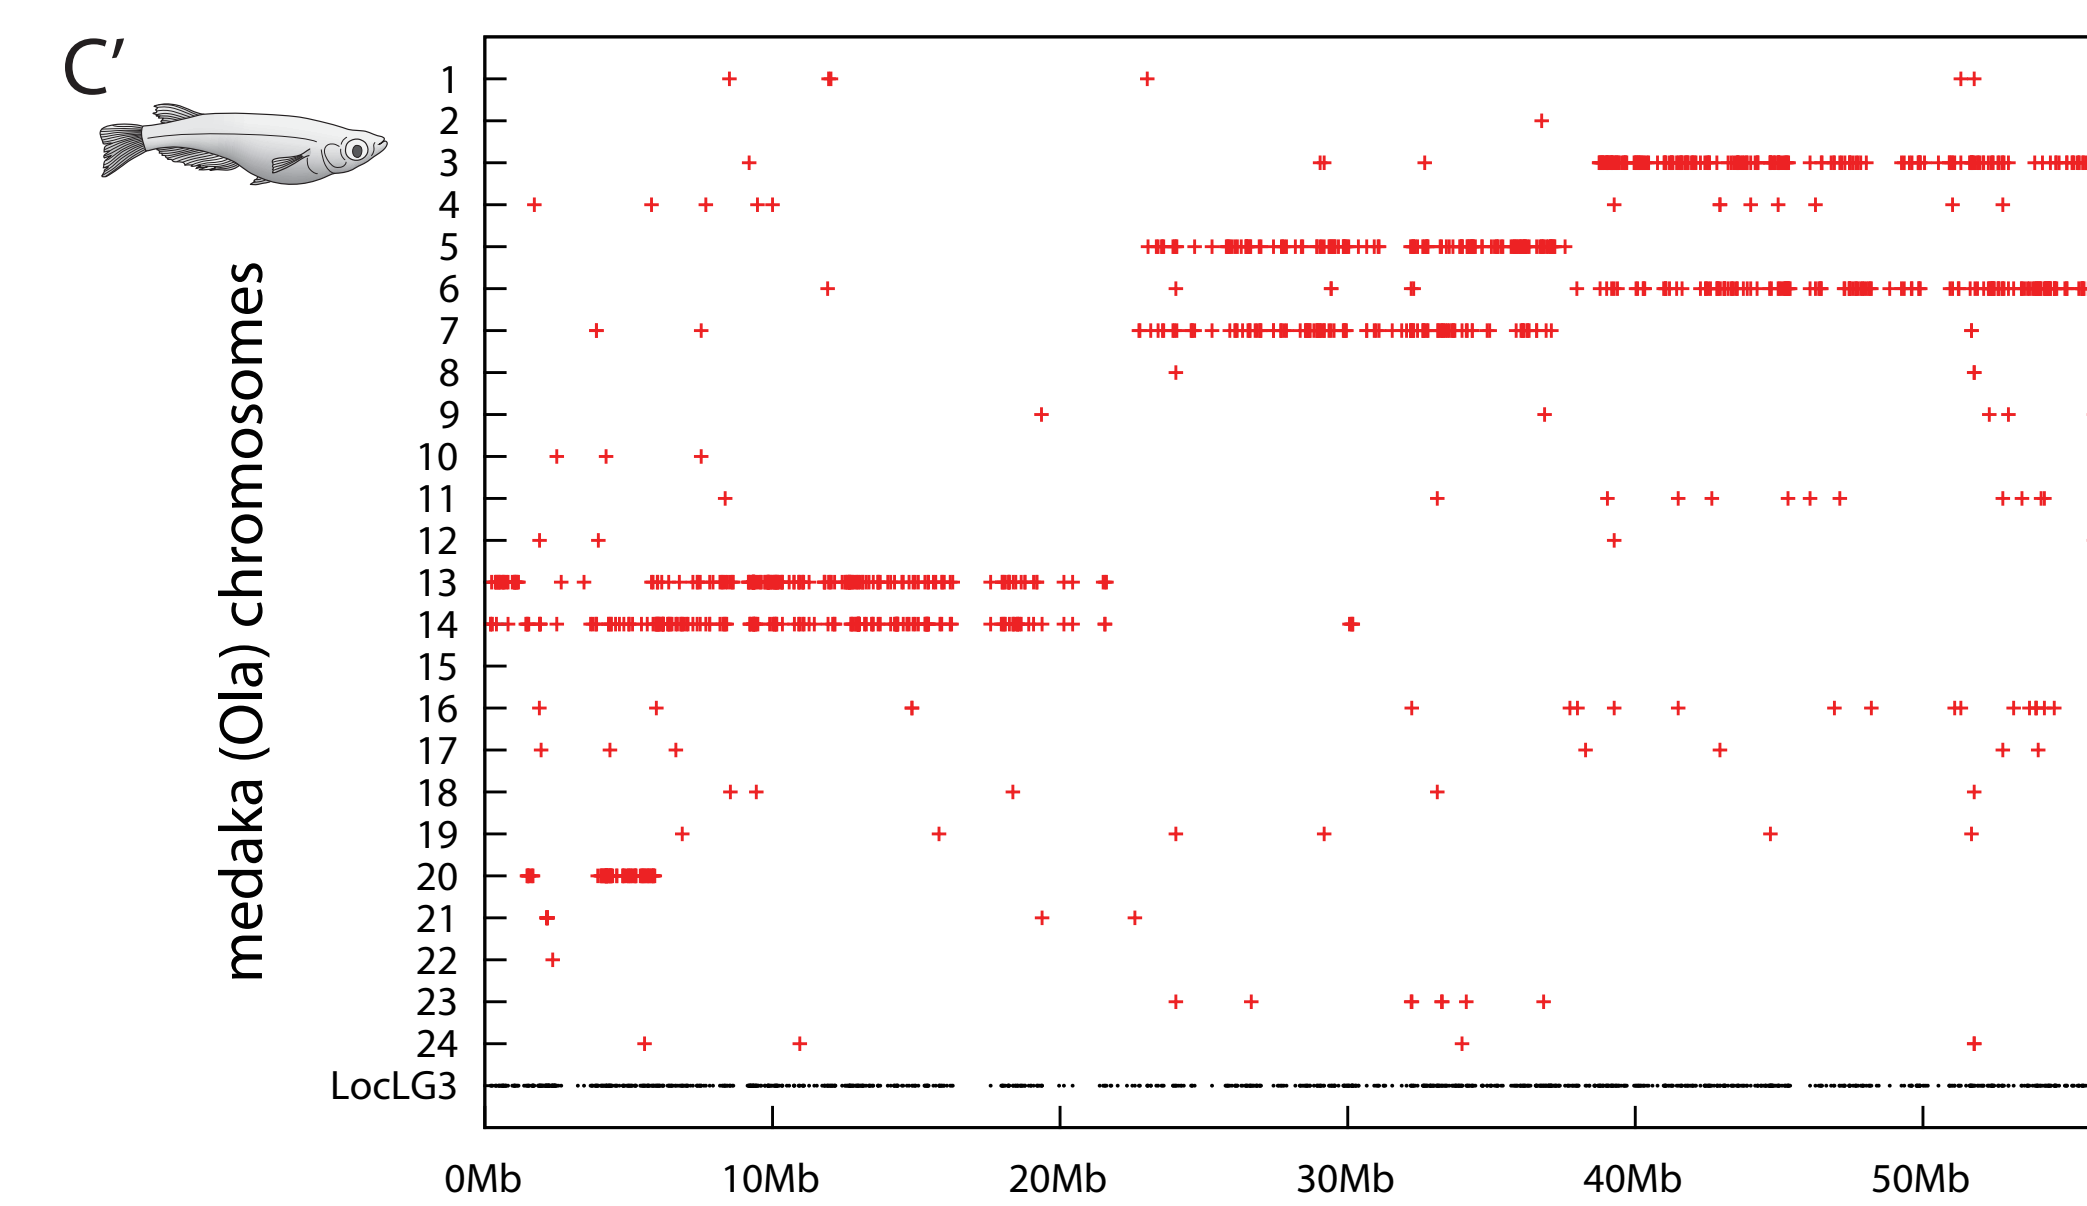

**D** Spotted Gar Linkage Group 4

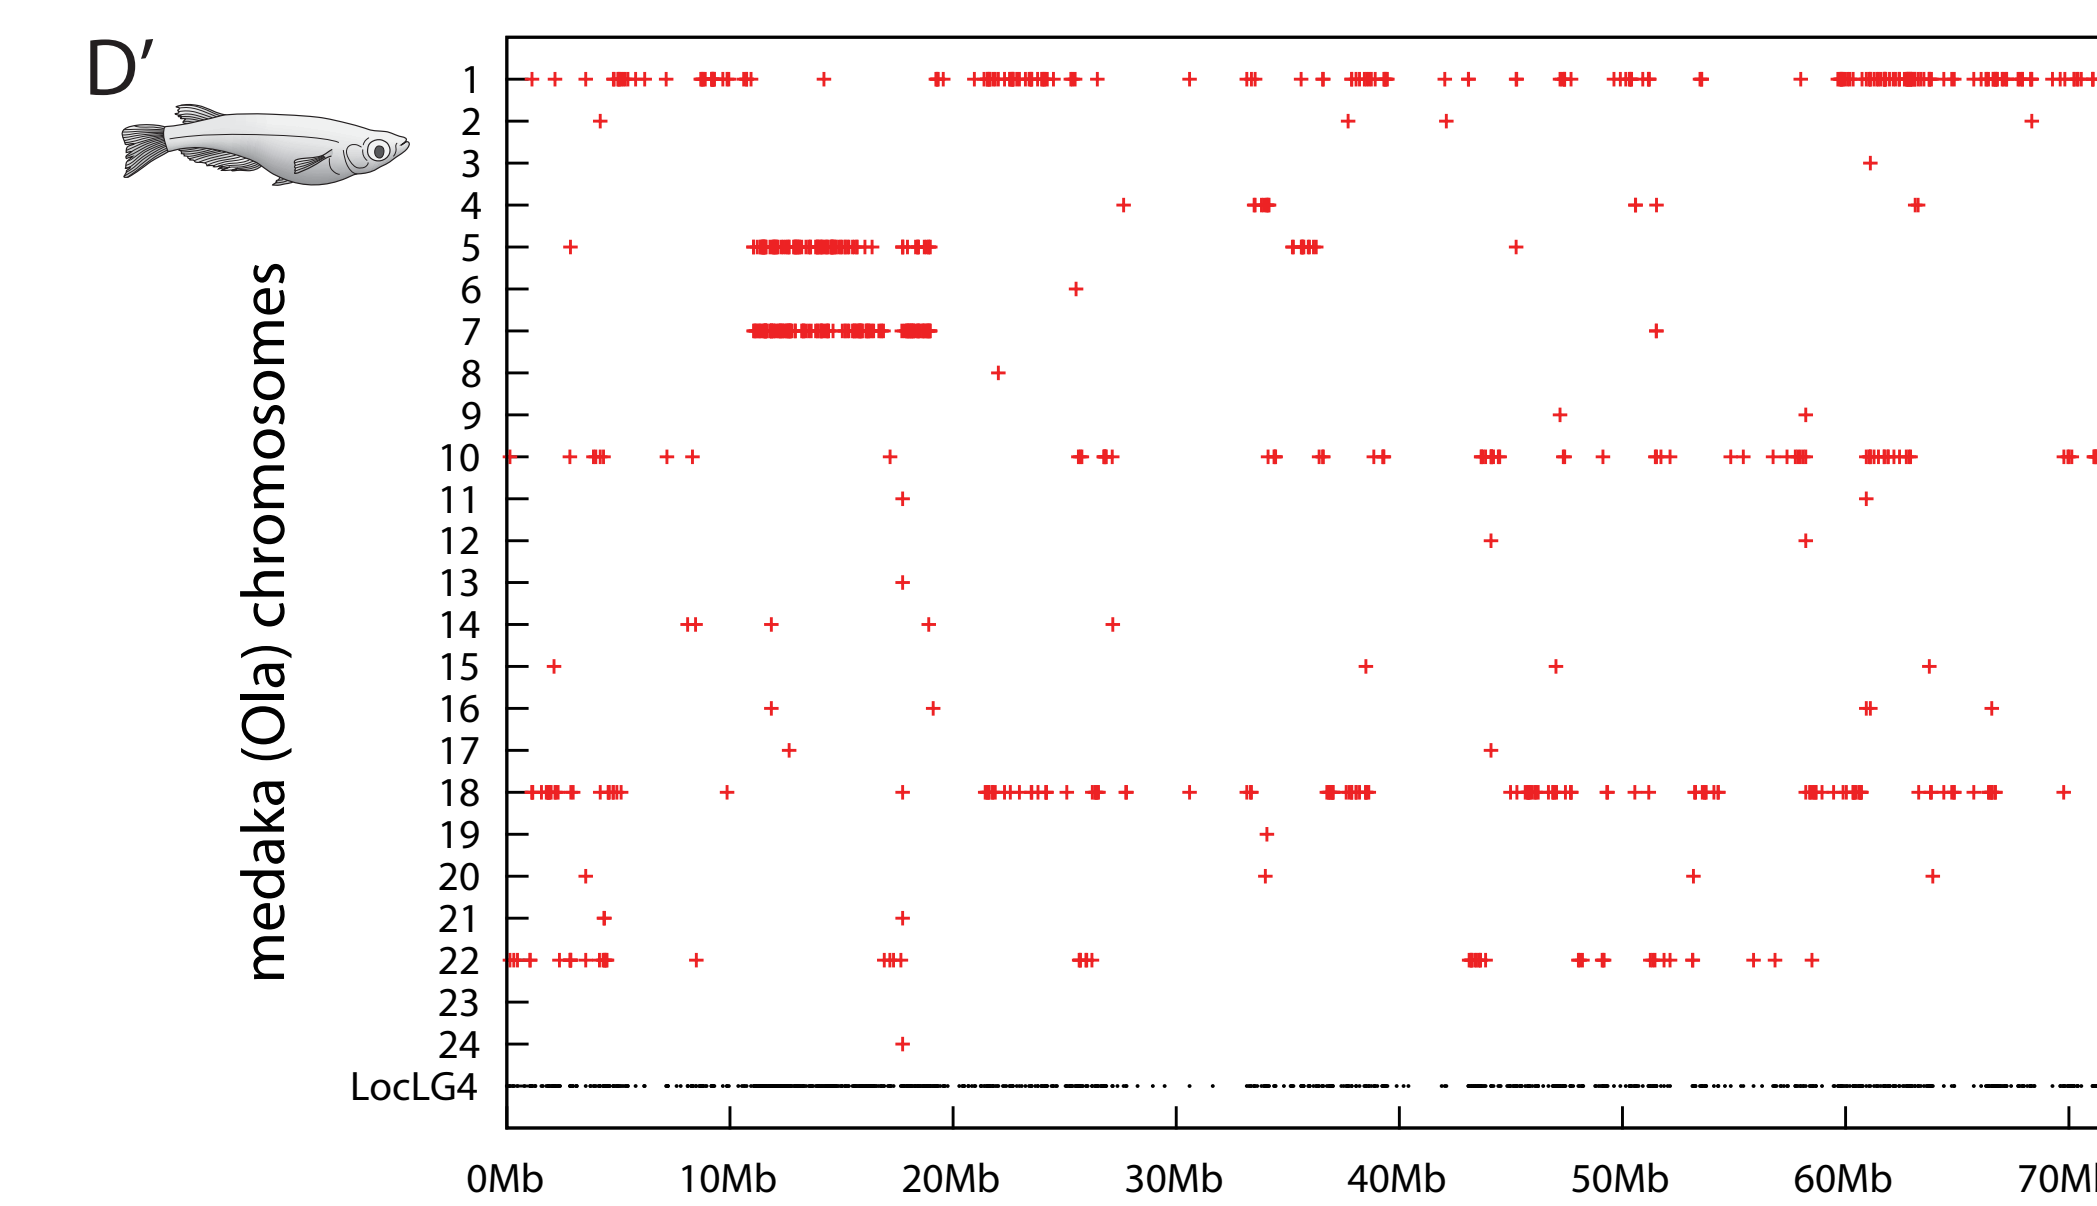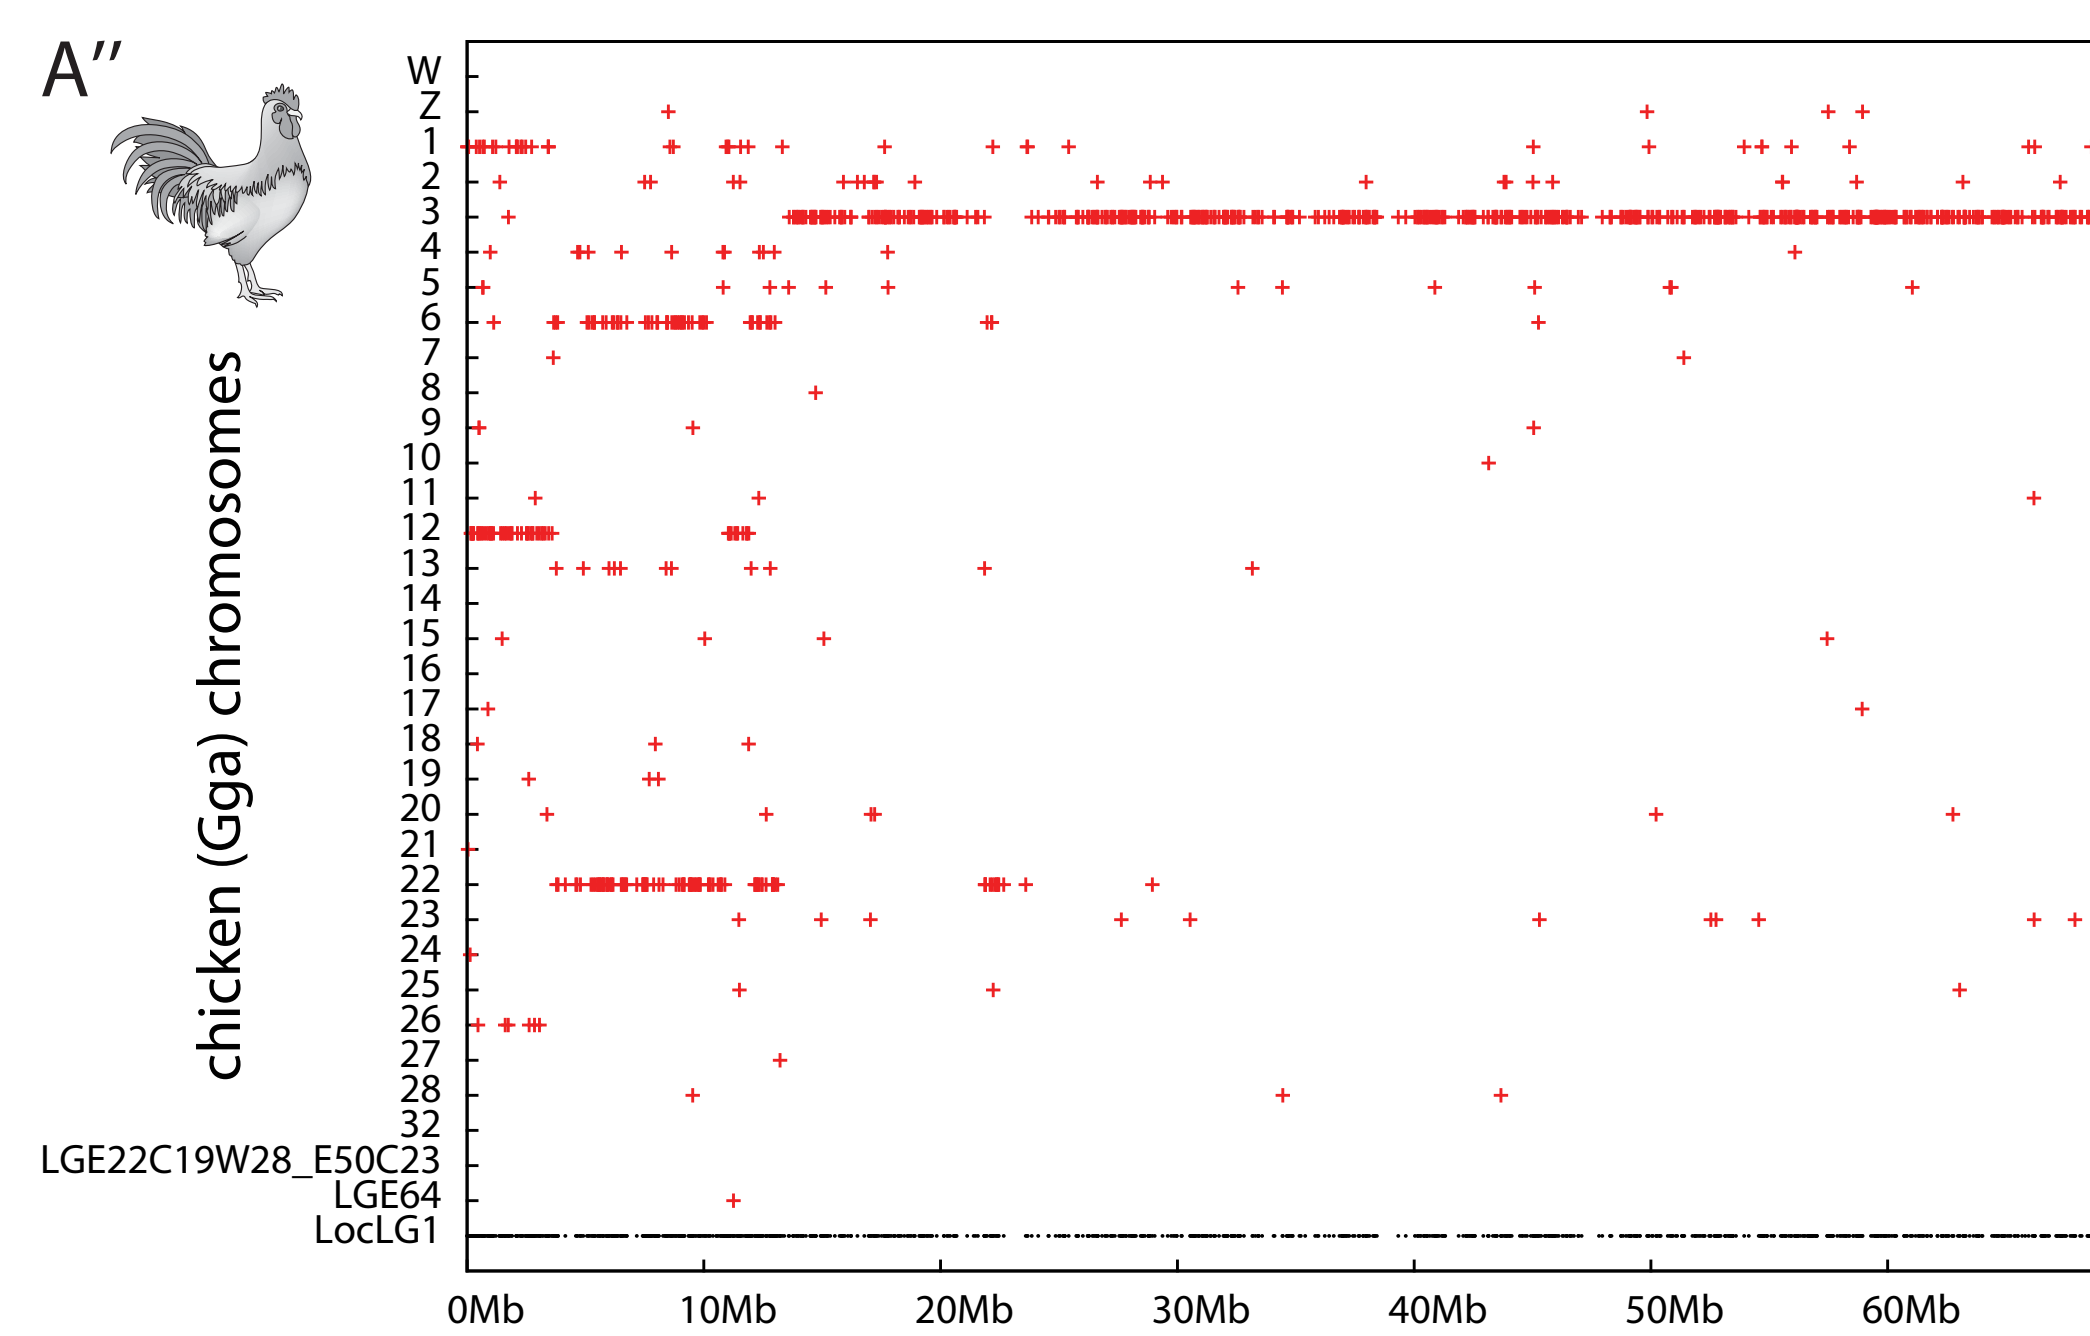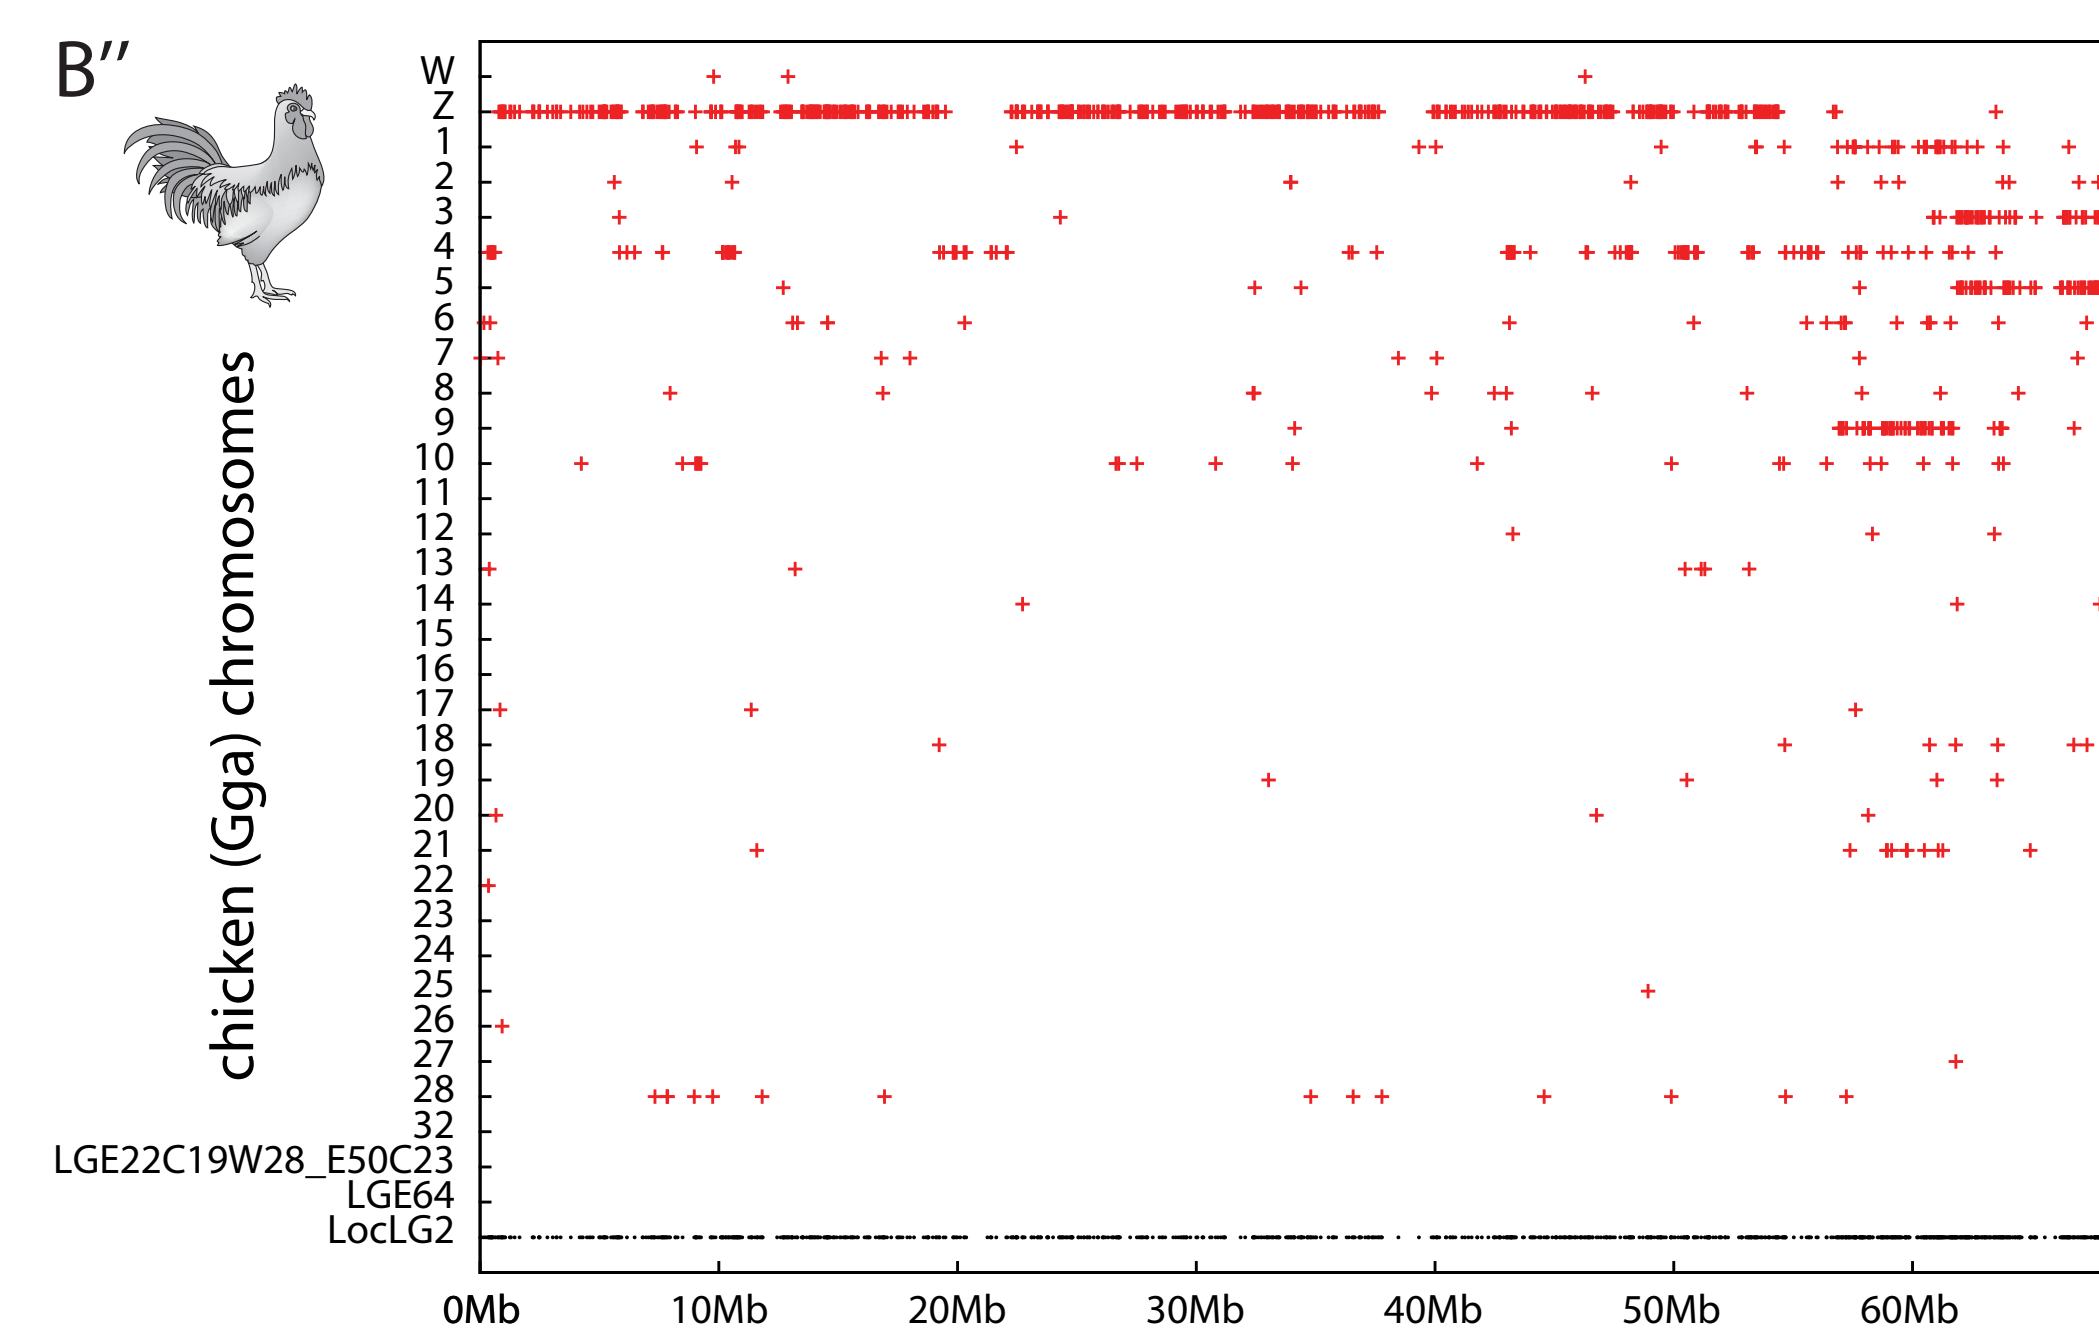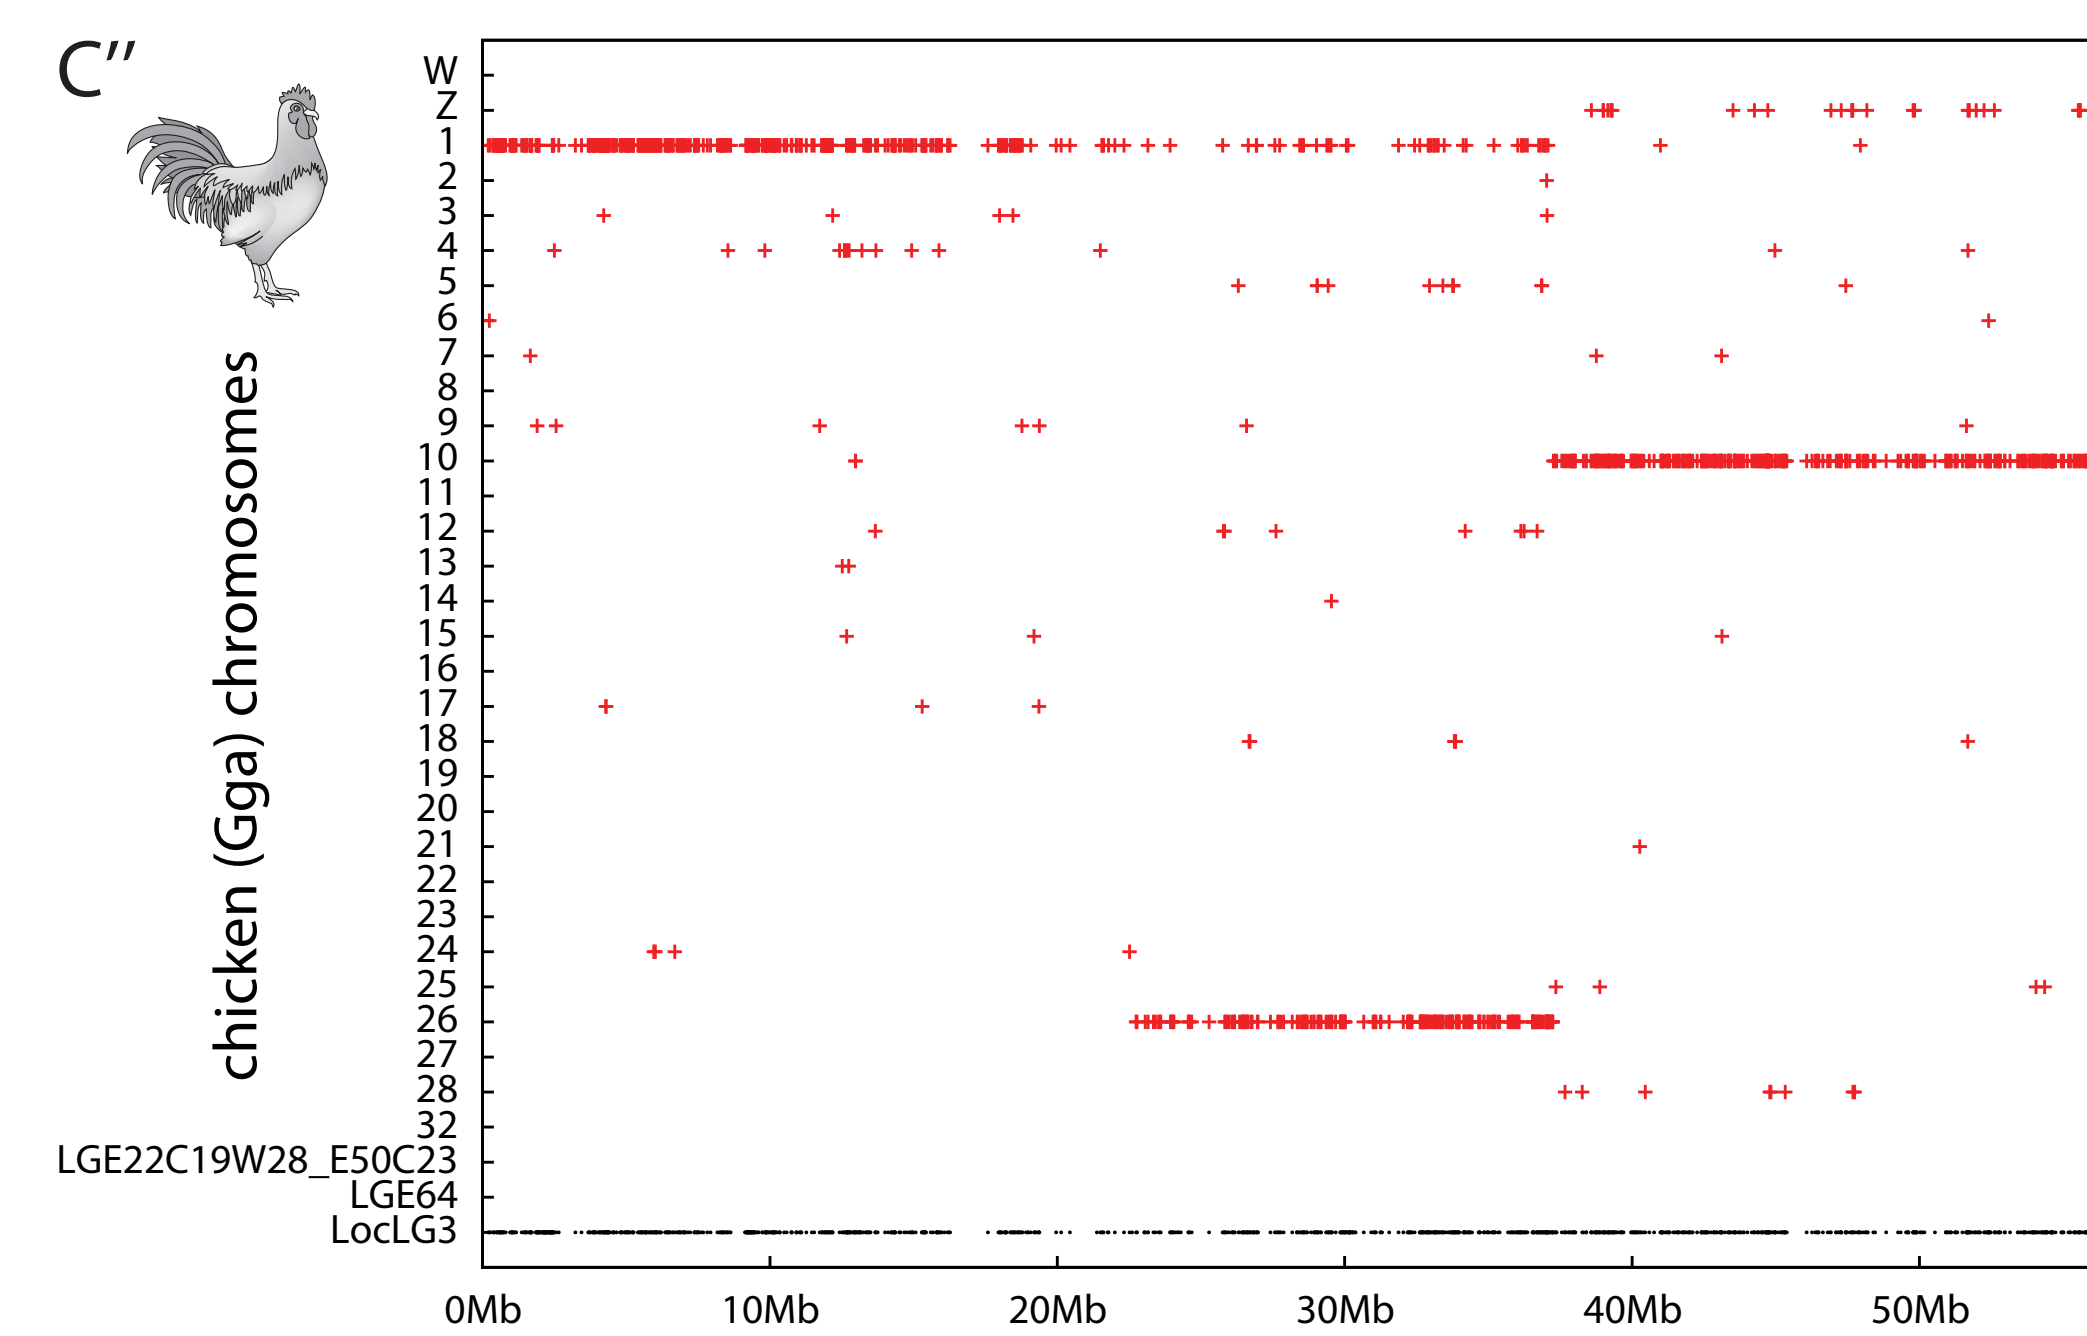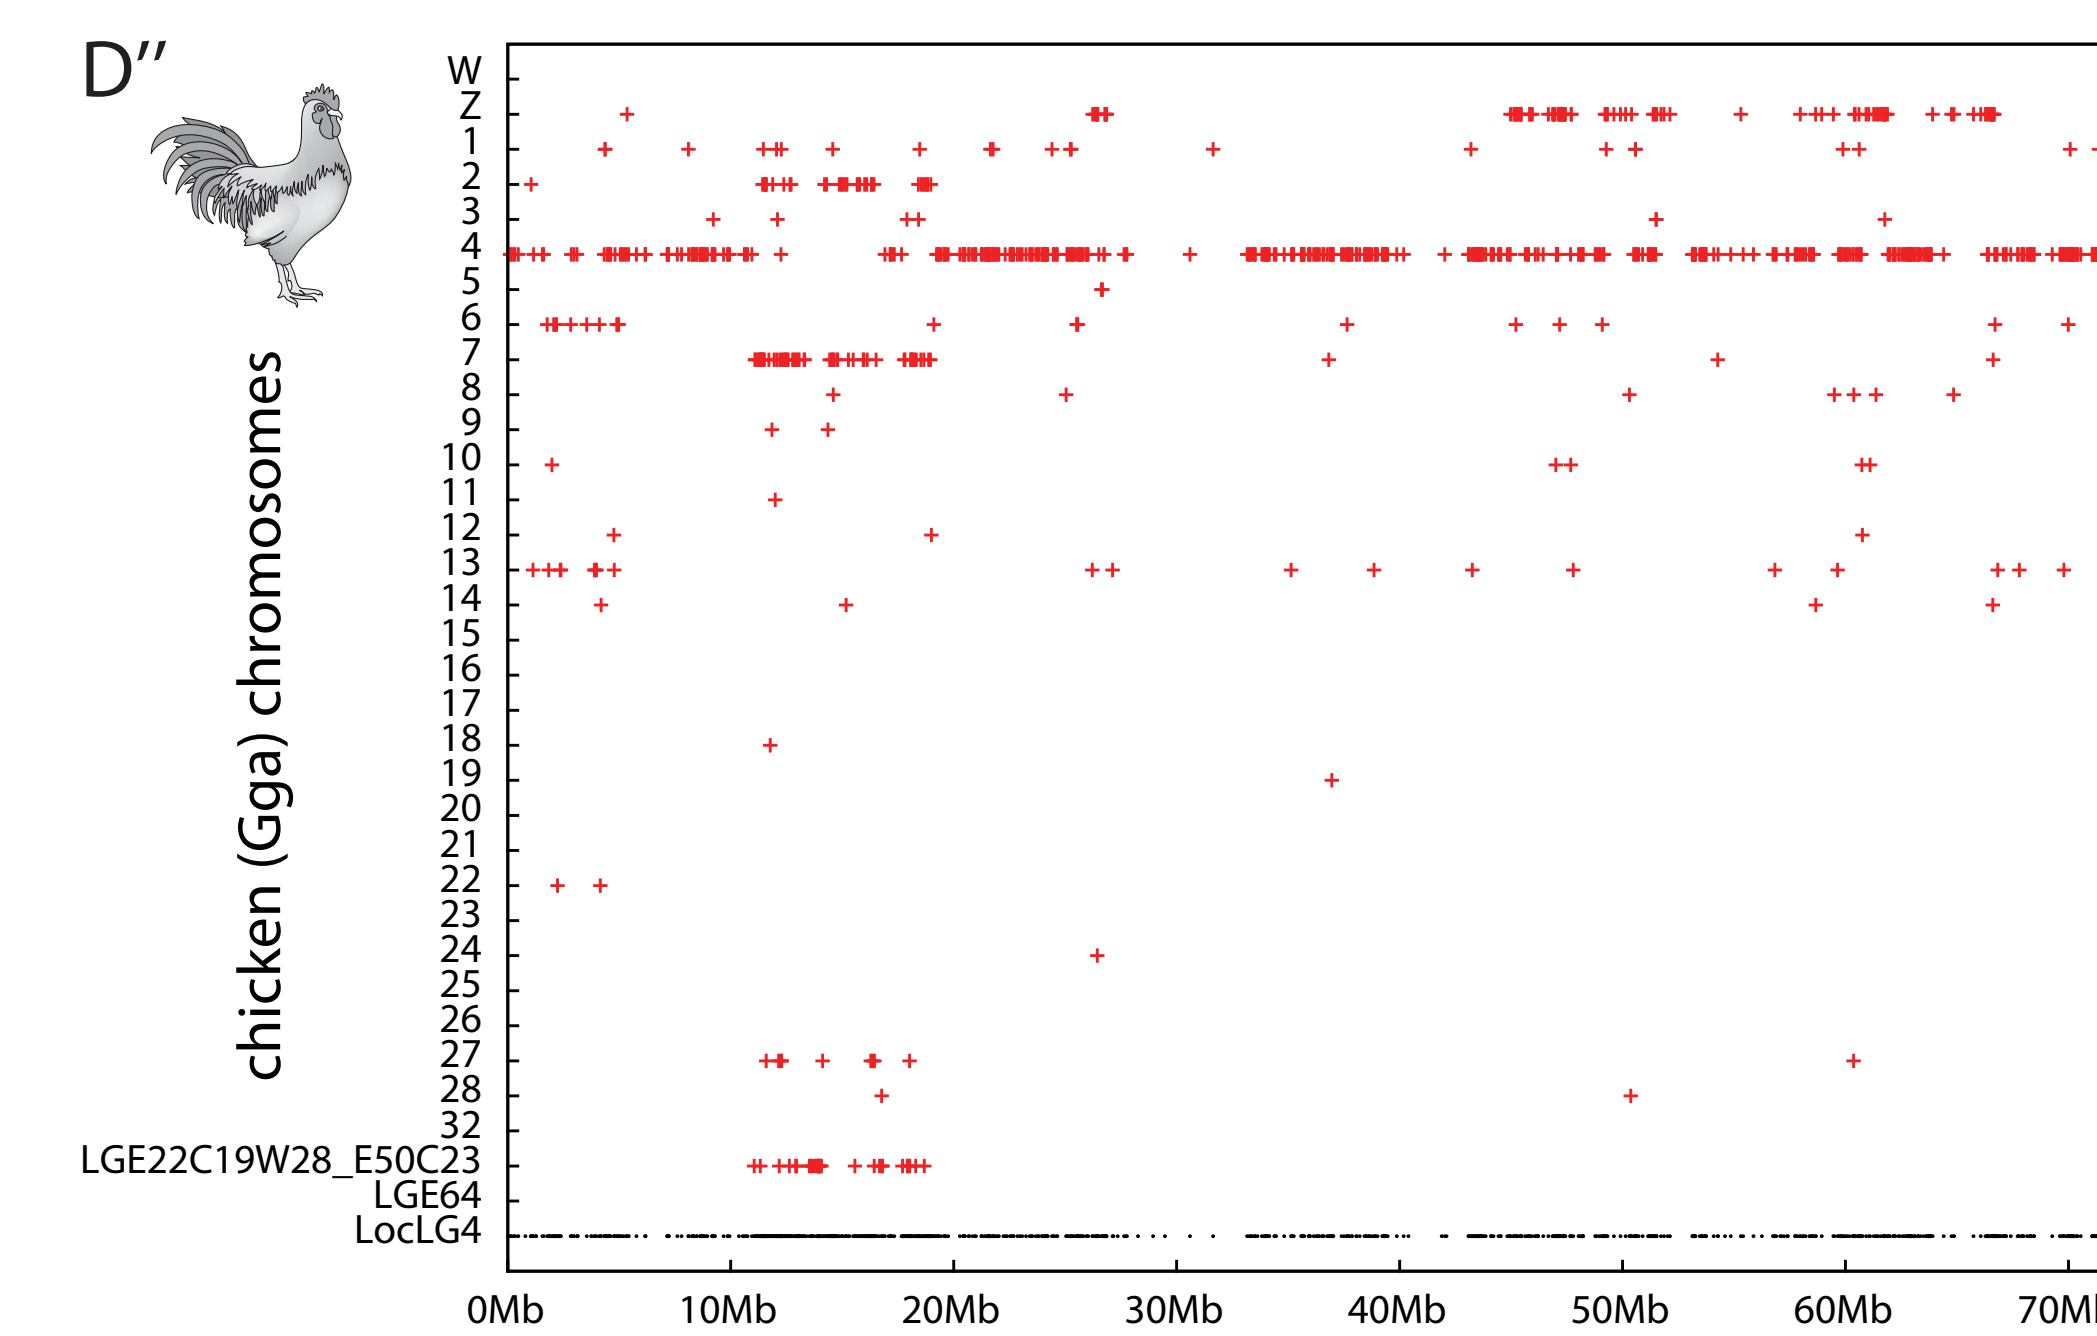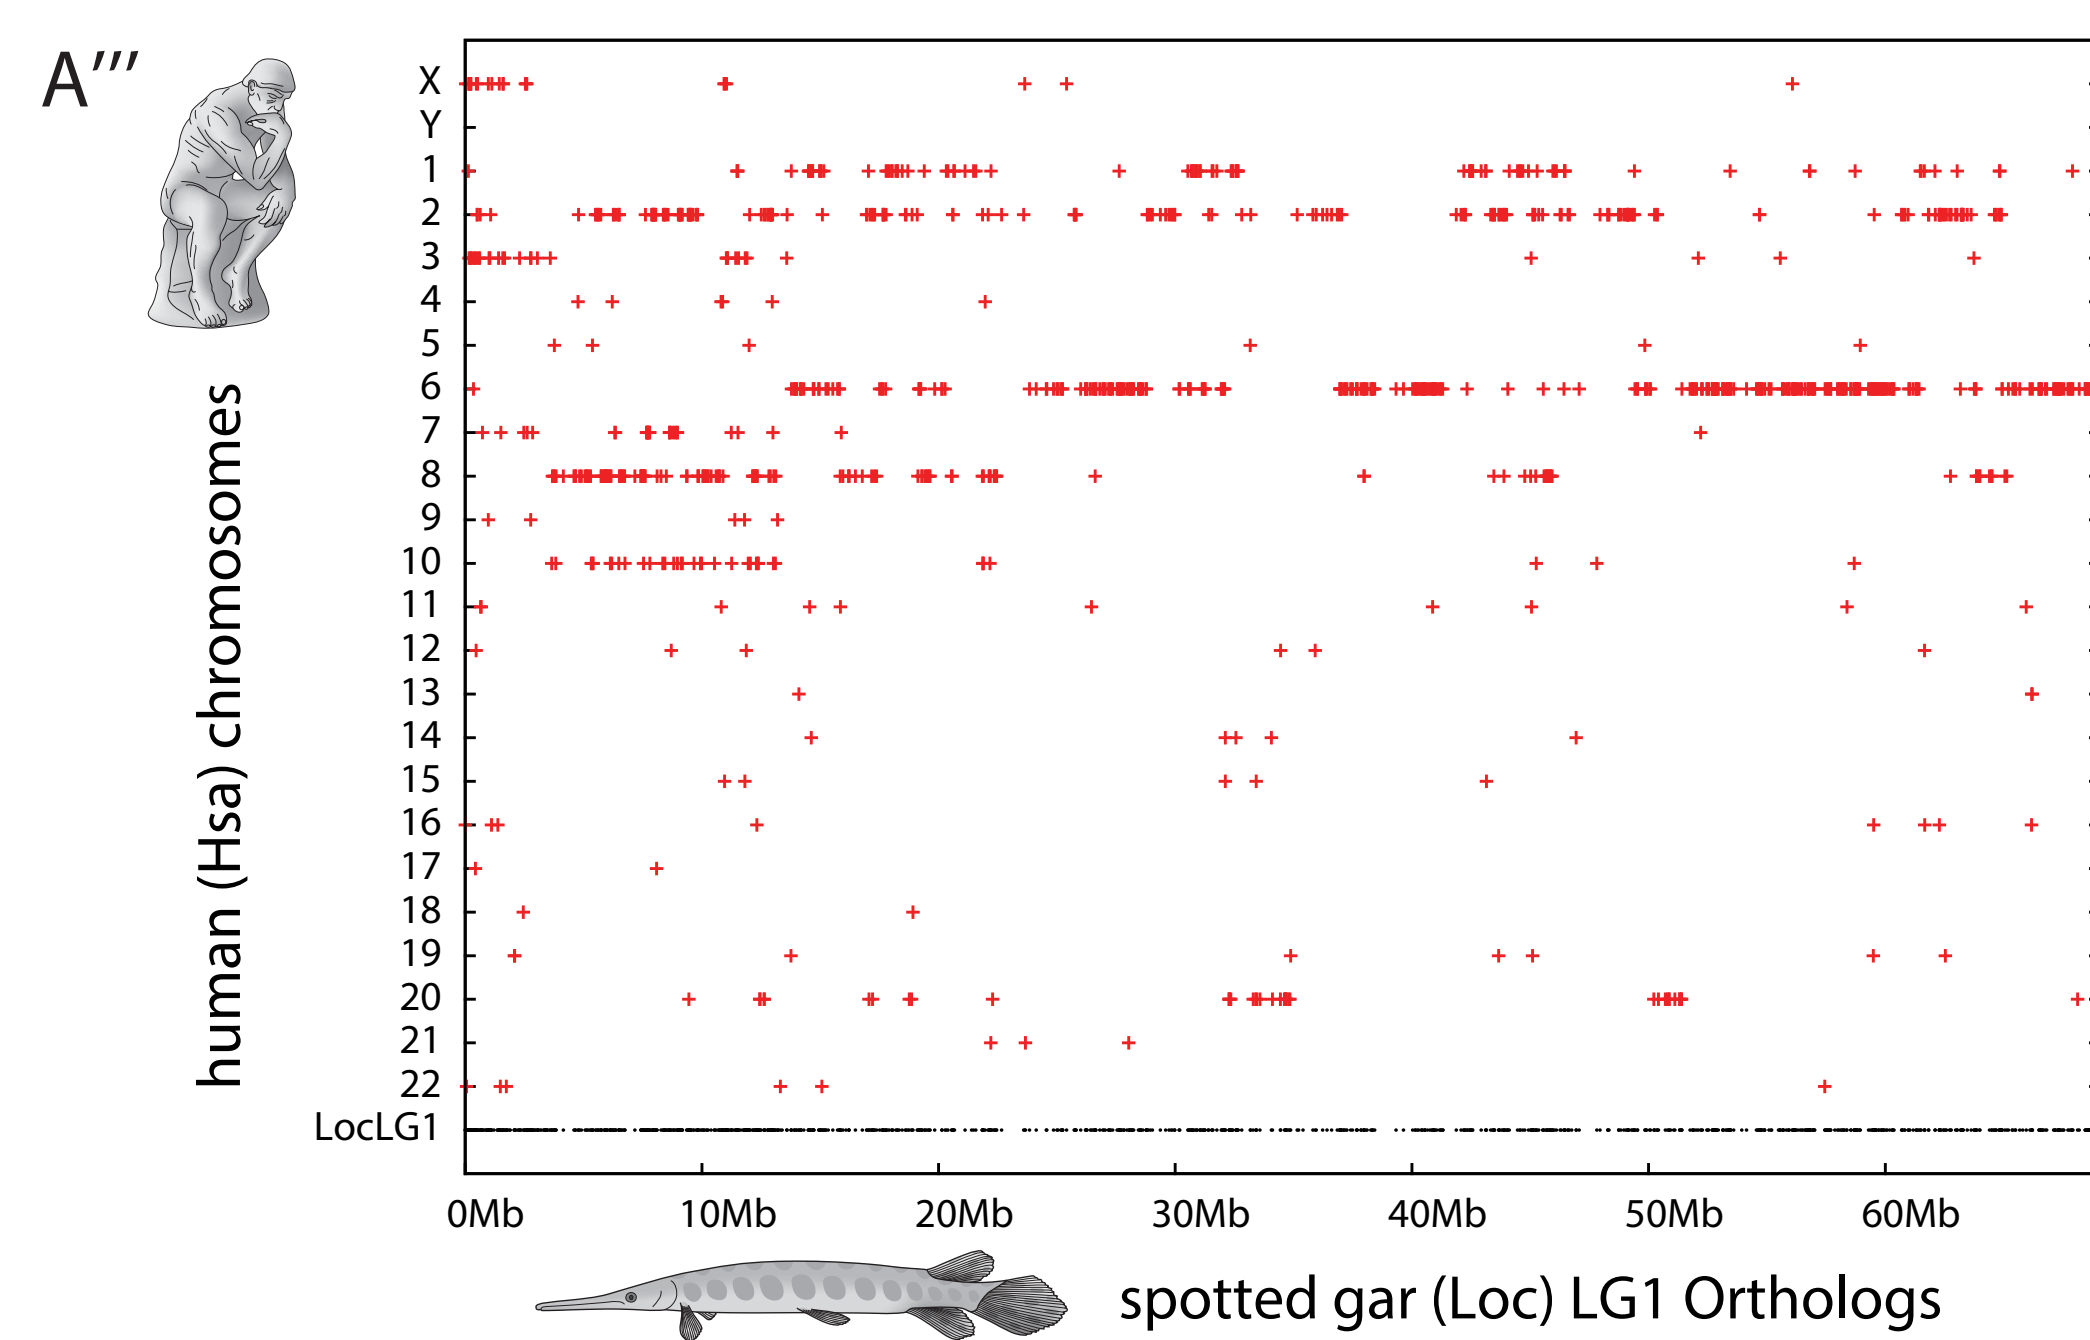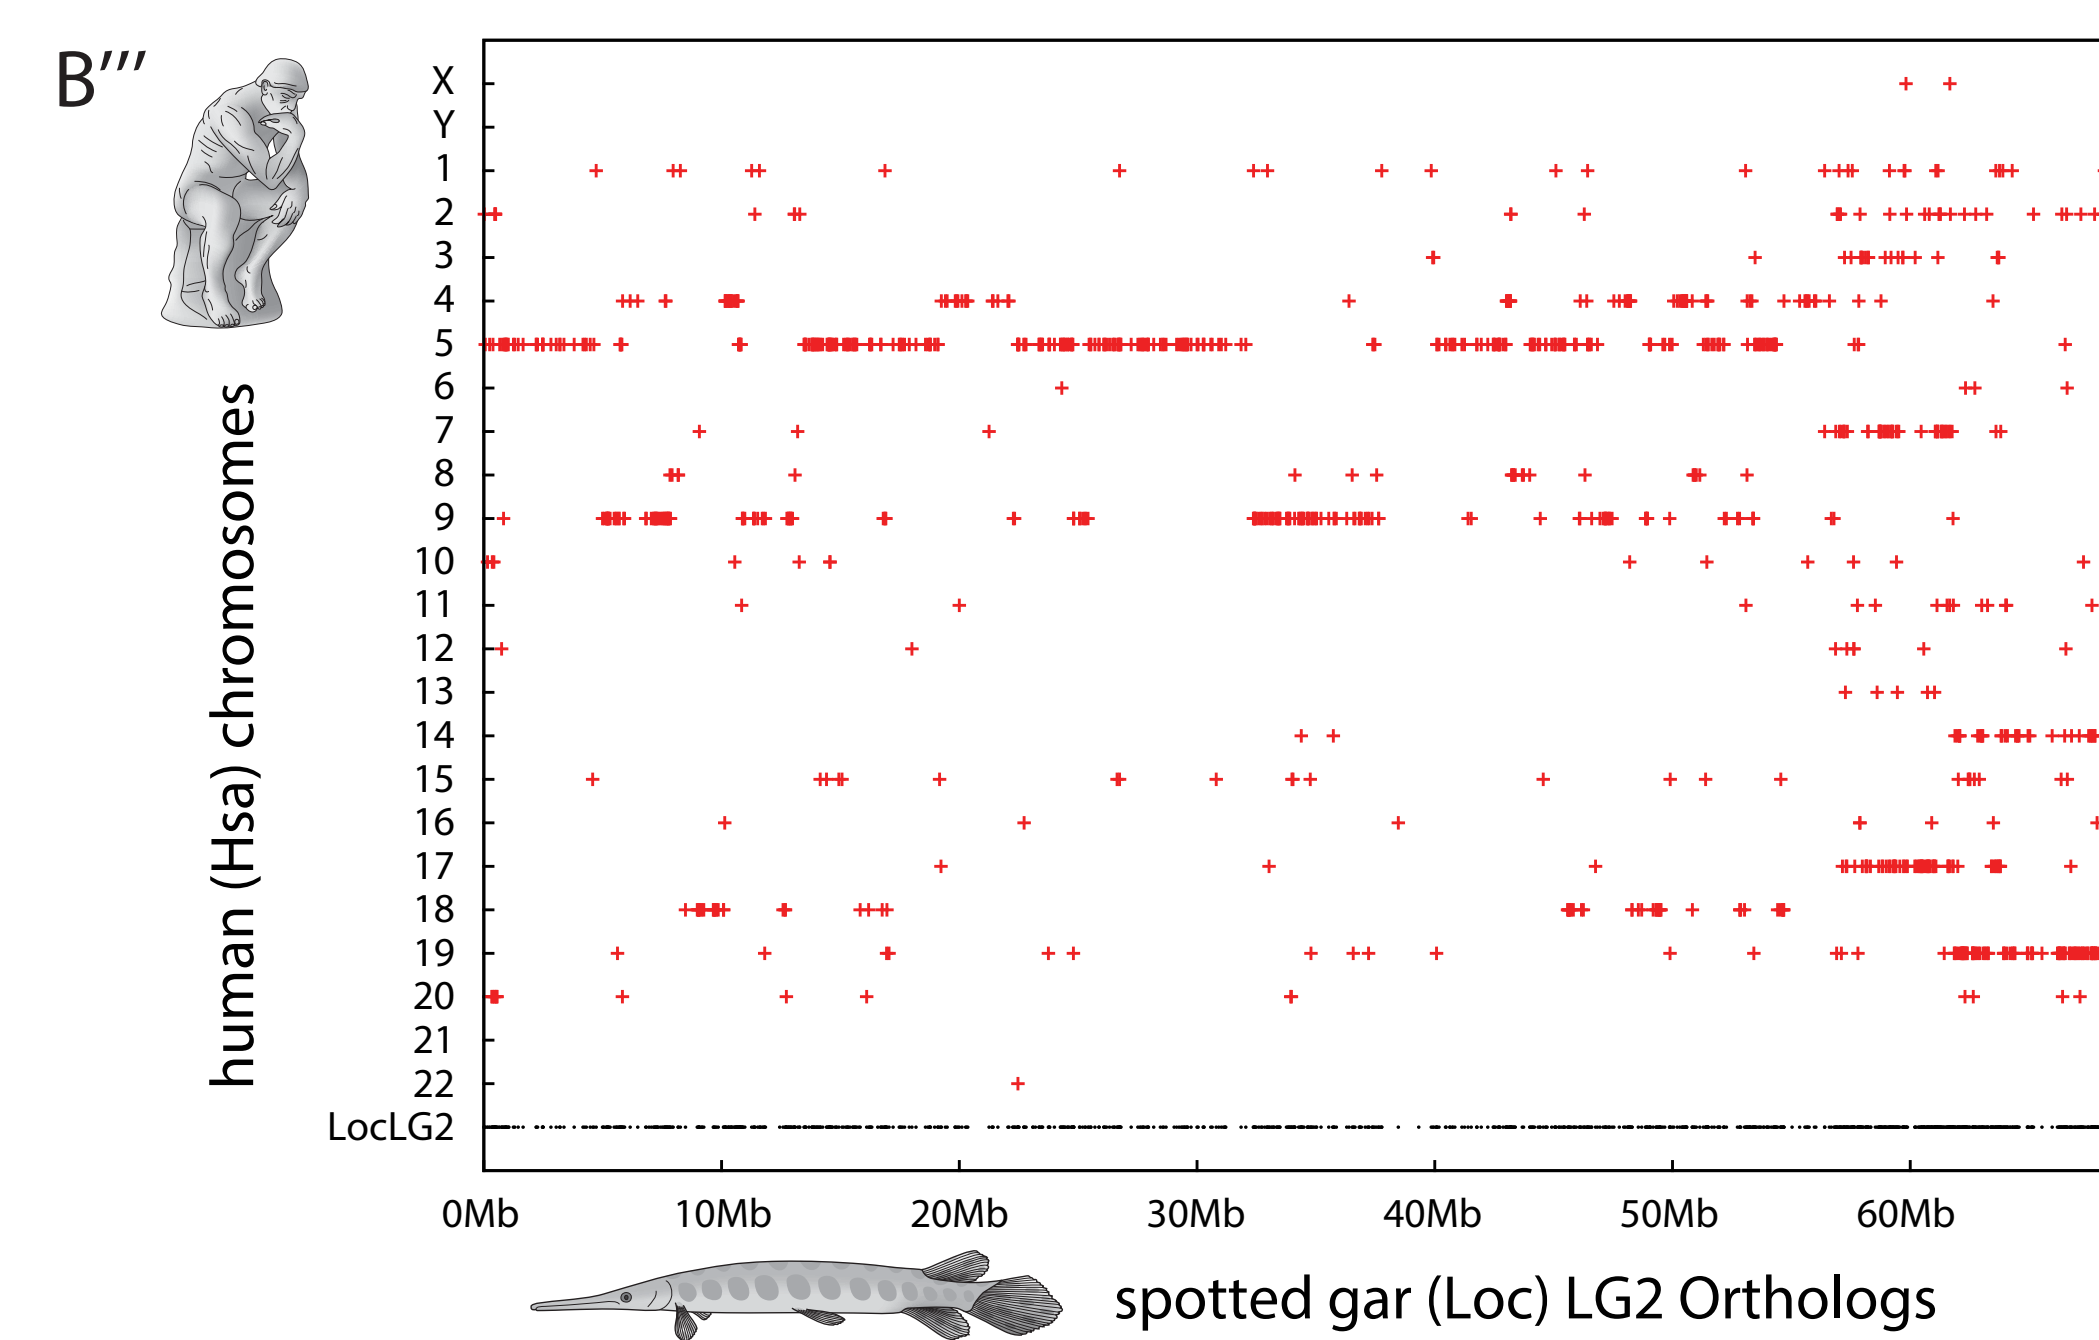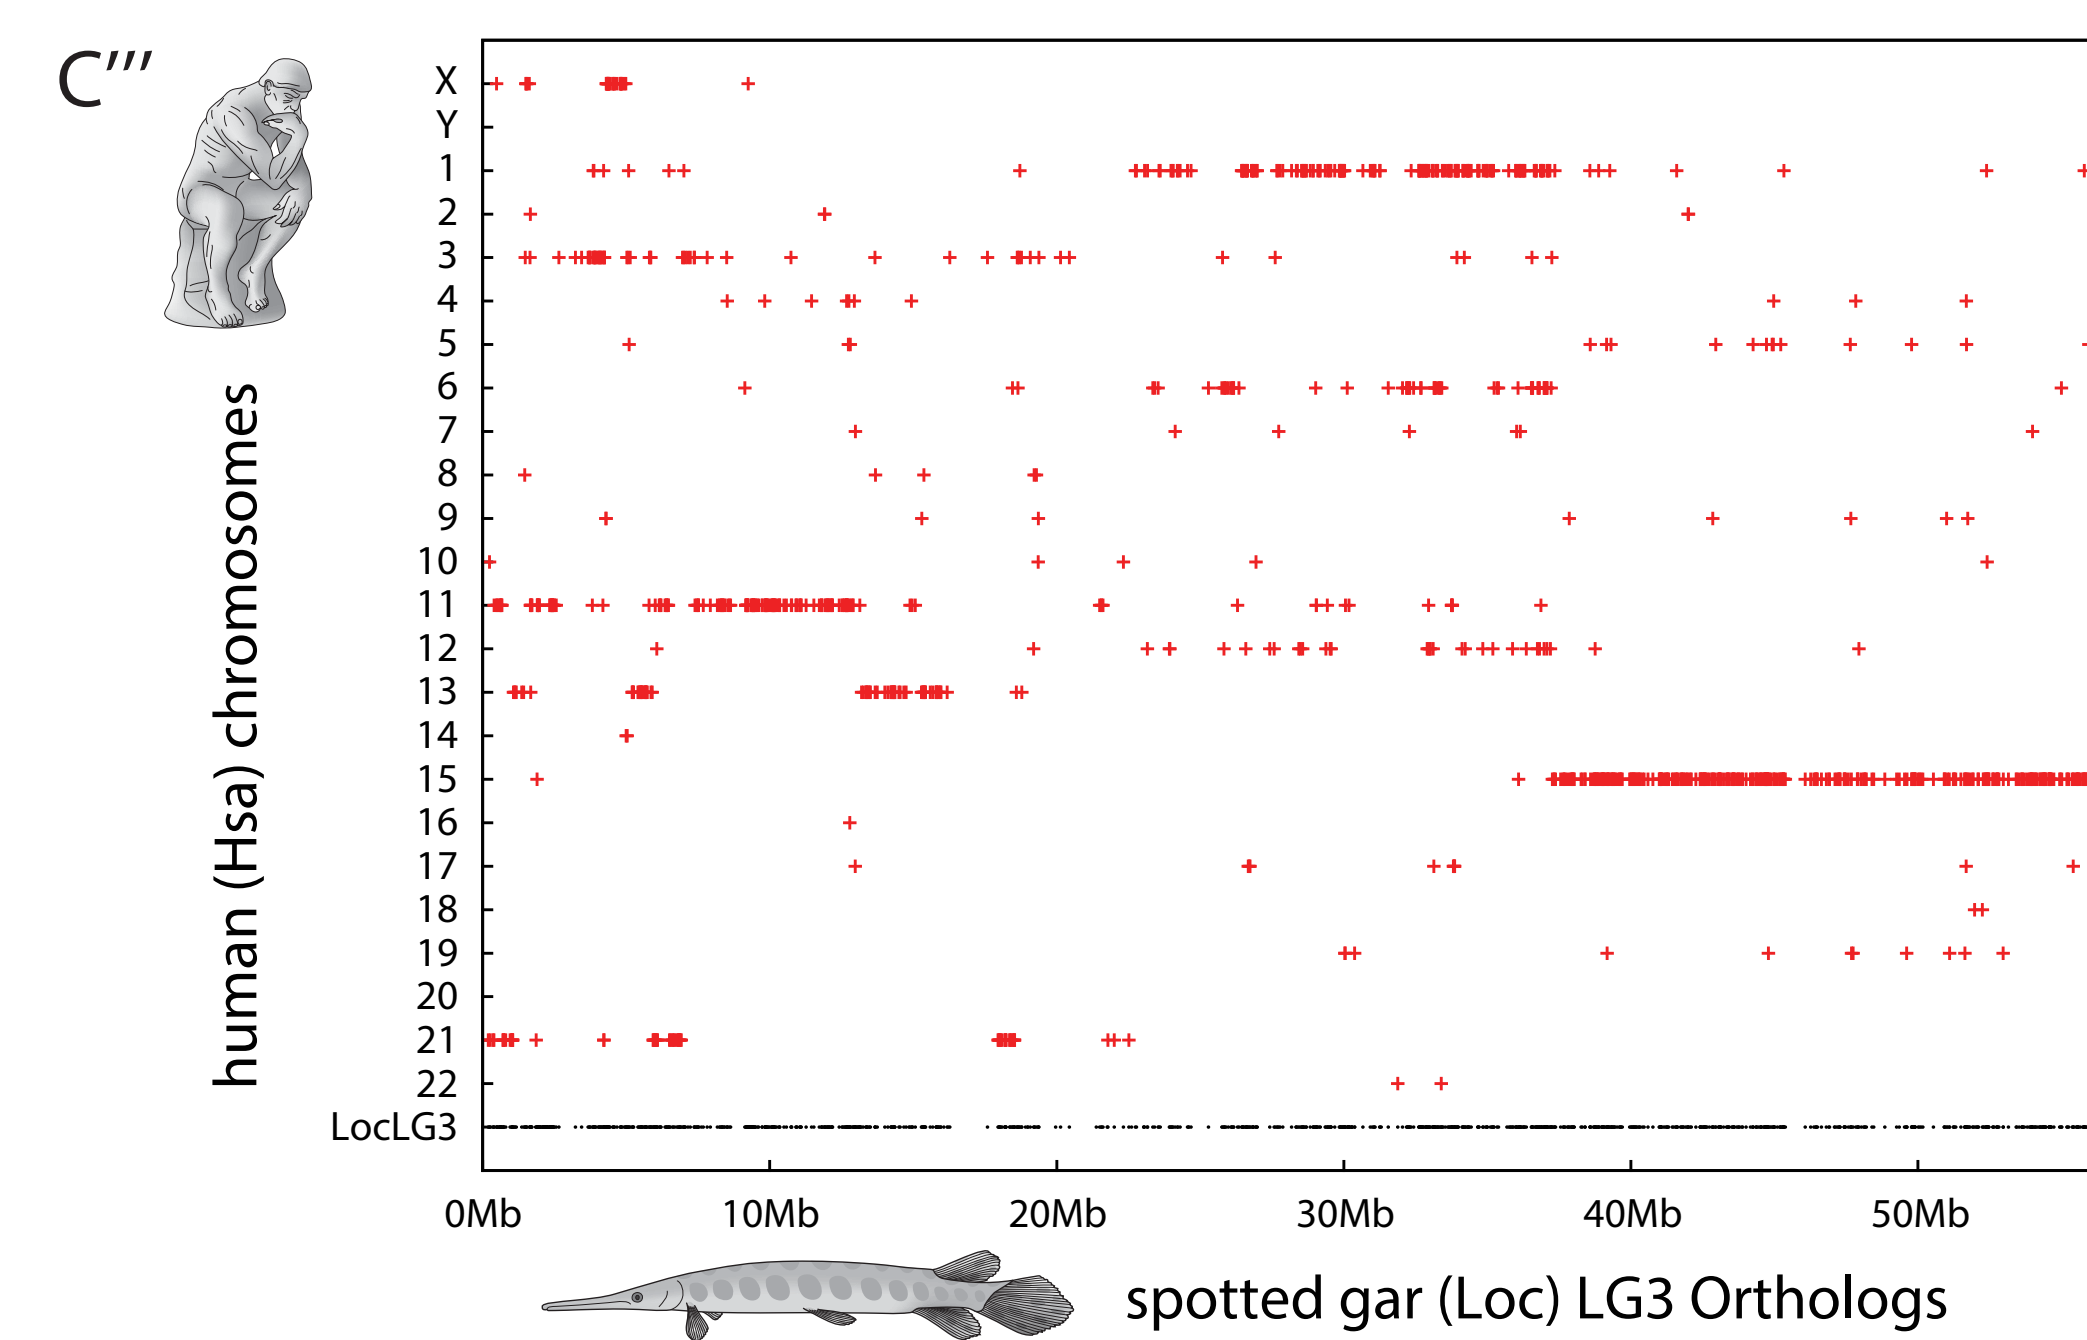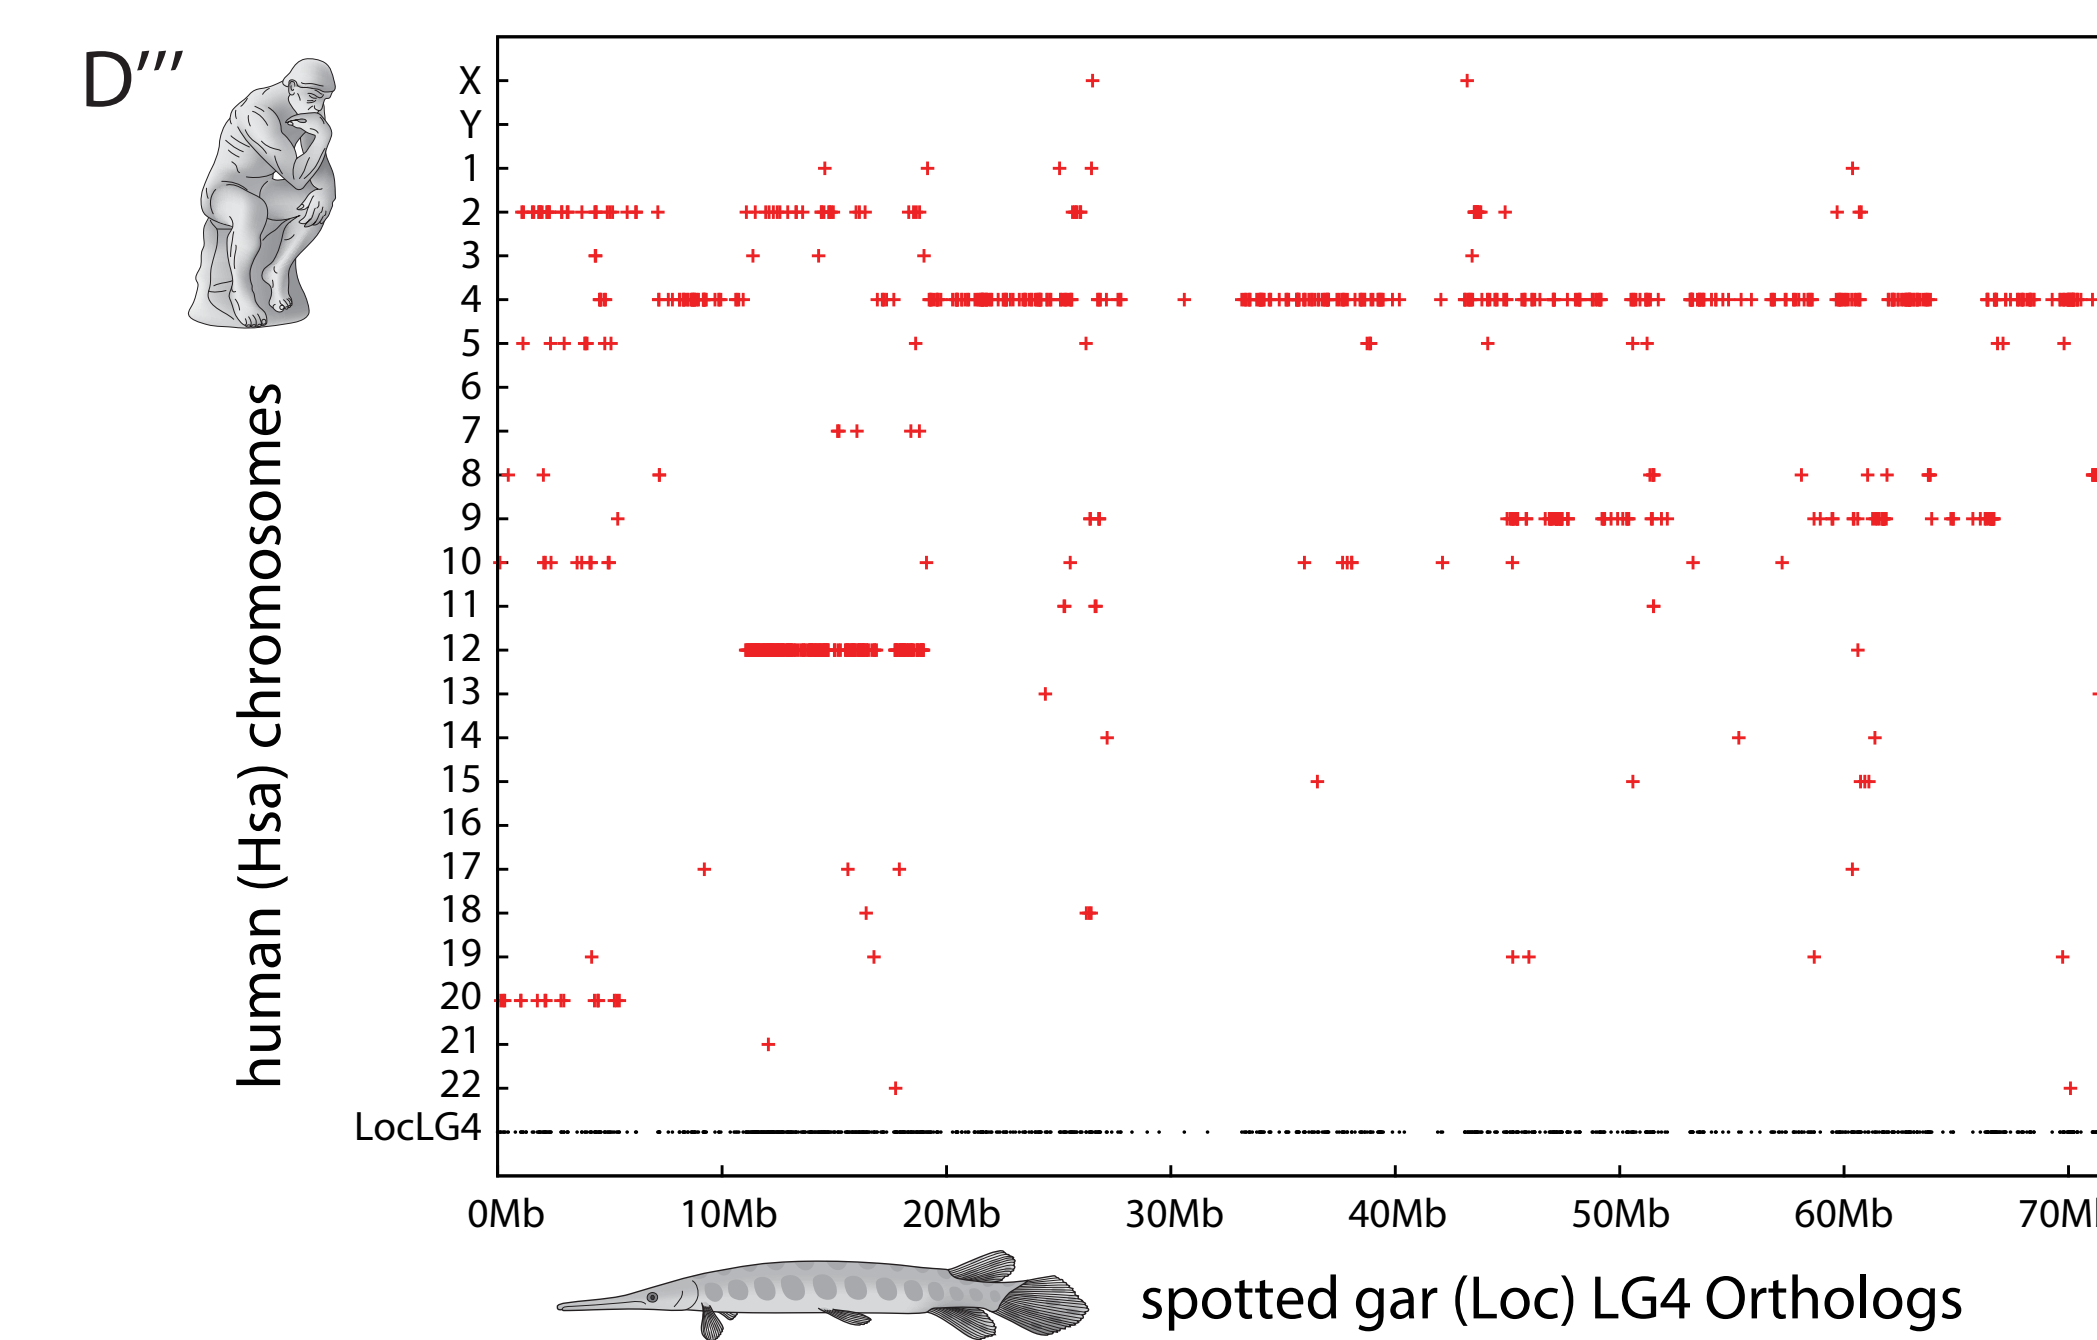



E Spotted Gar Linkage Group 5

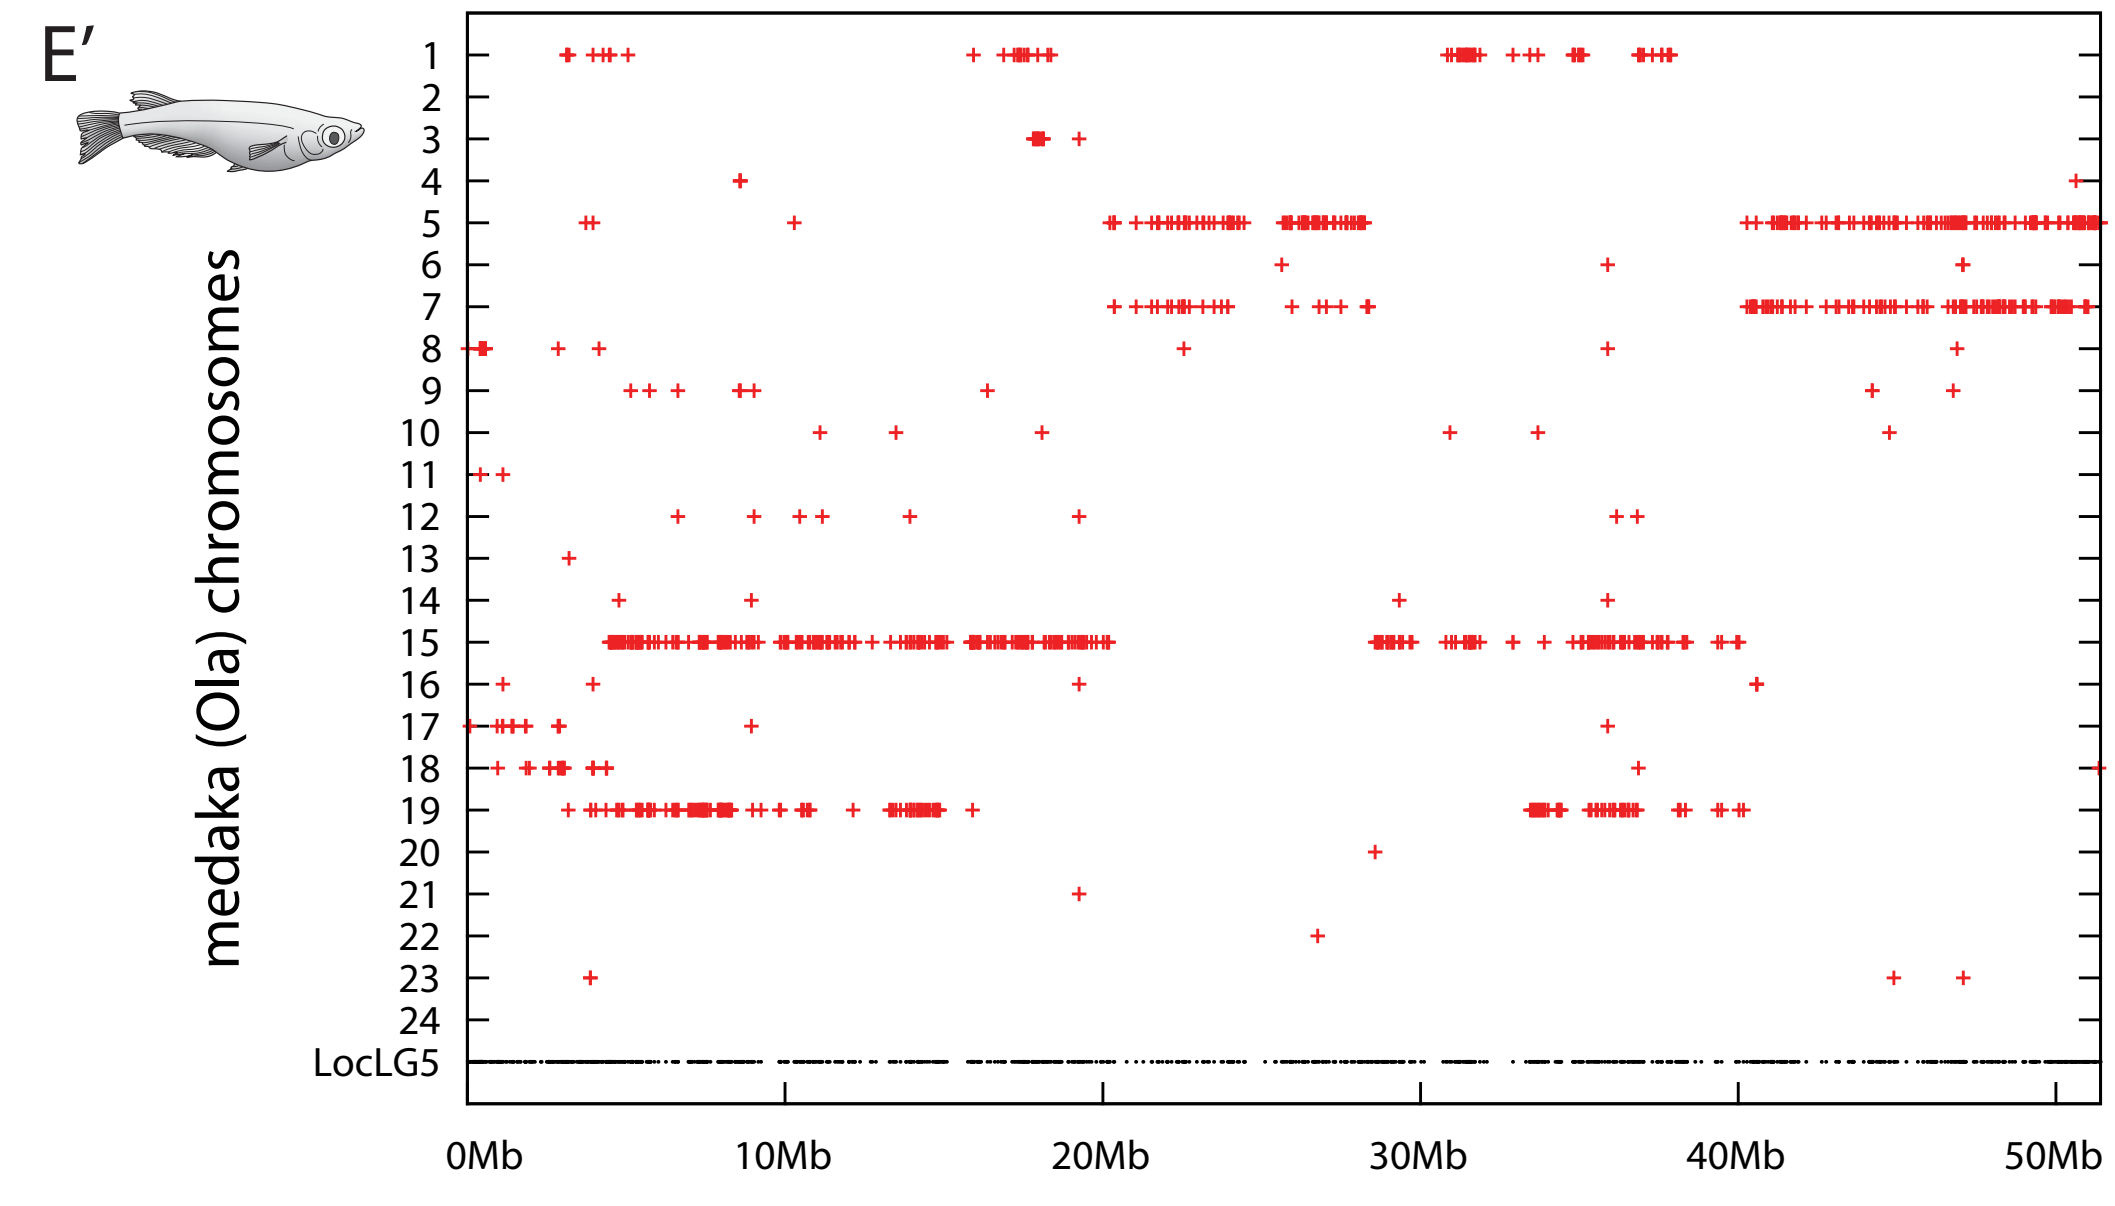

F Spotted Gar Linkage Group 6

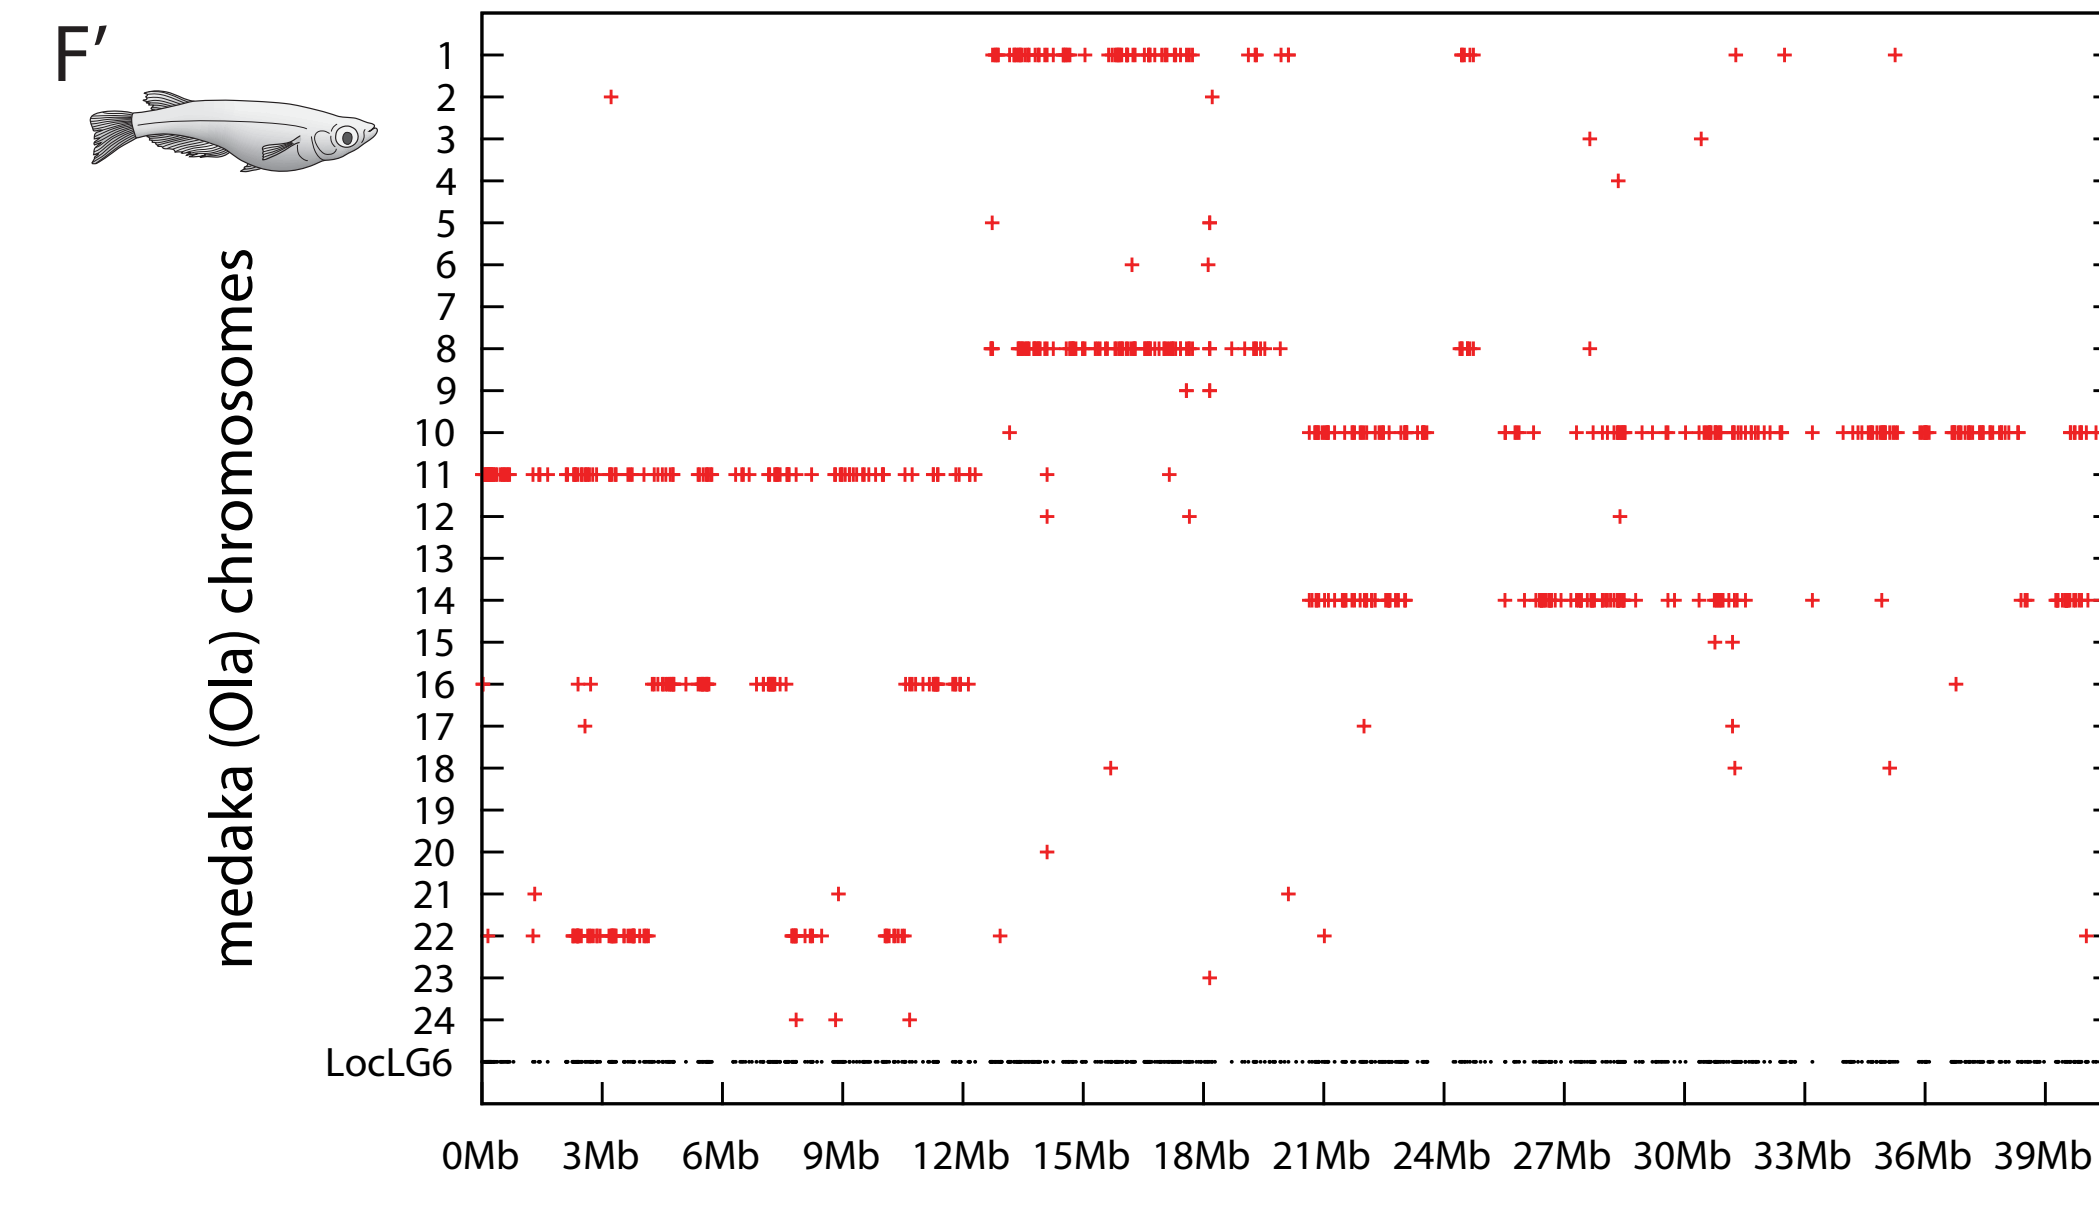

G Spotted Gar Linkage Group 7

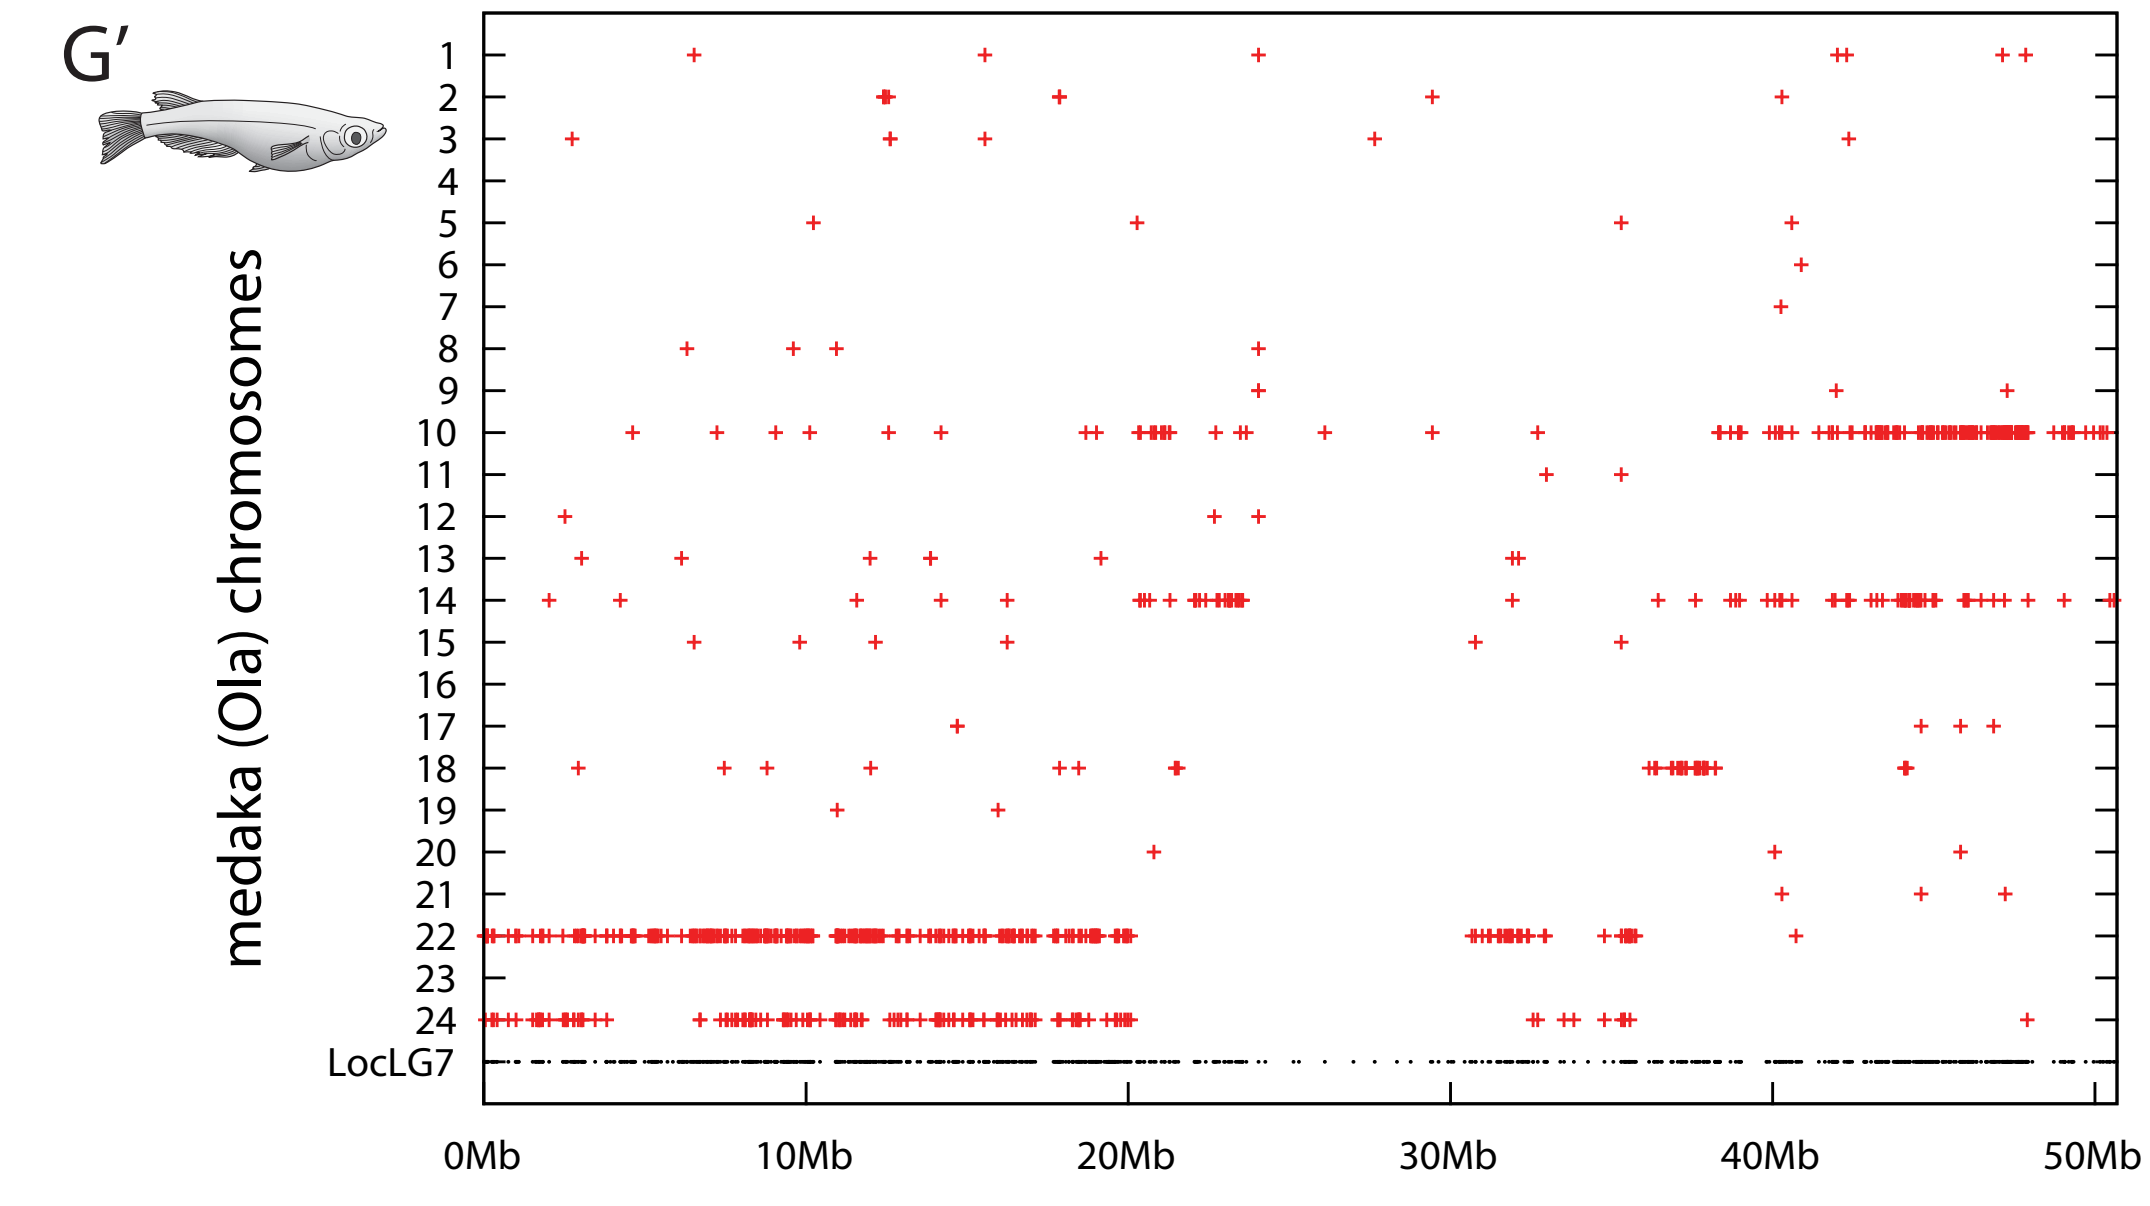

H Spotted Gar Linkage Group 8

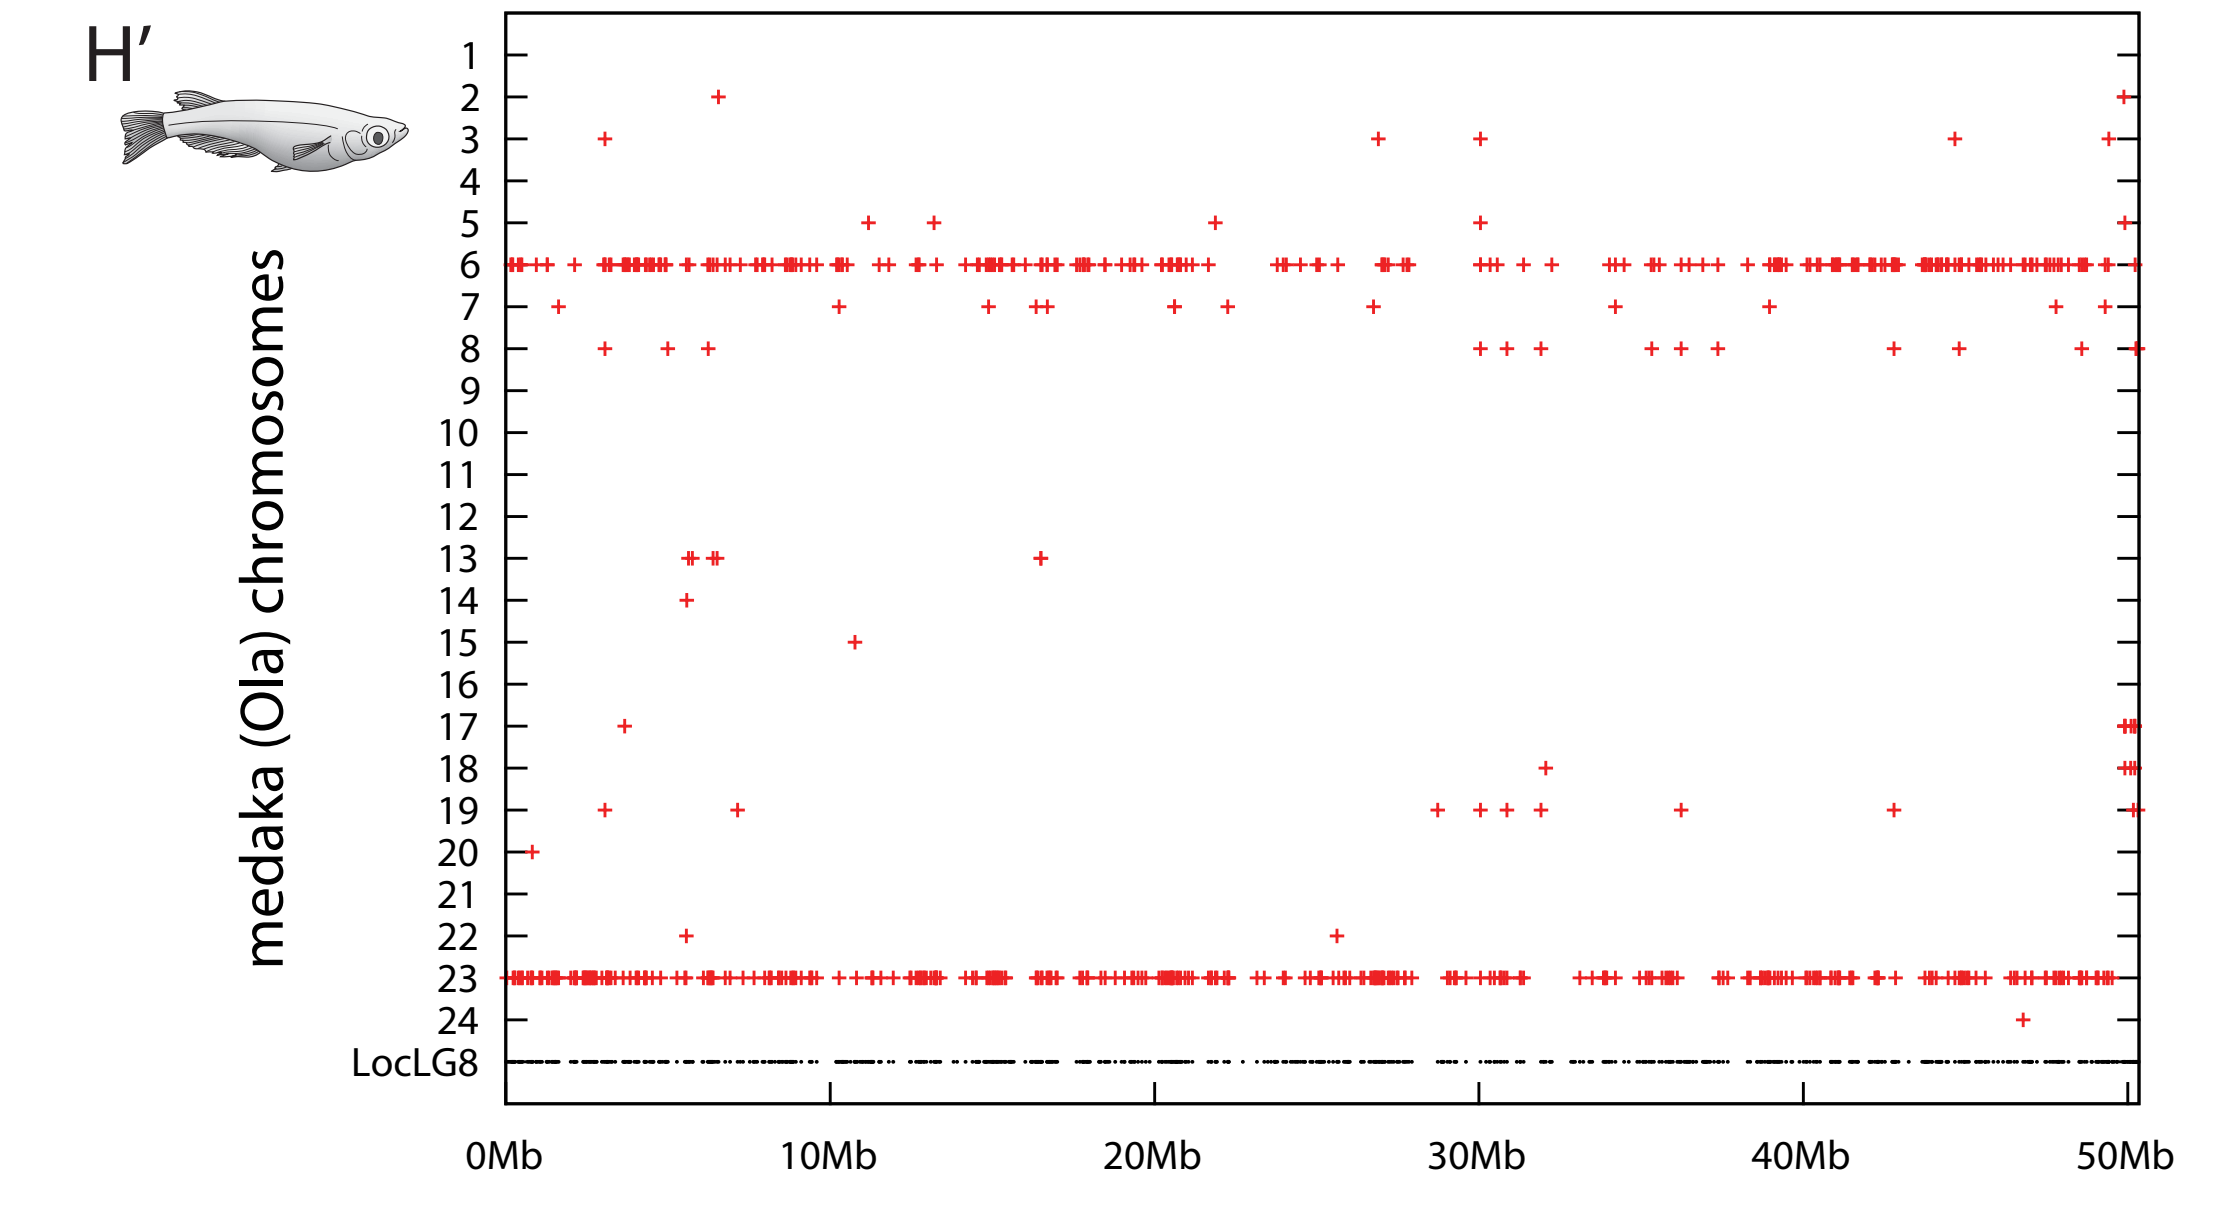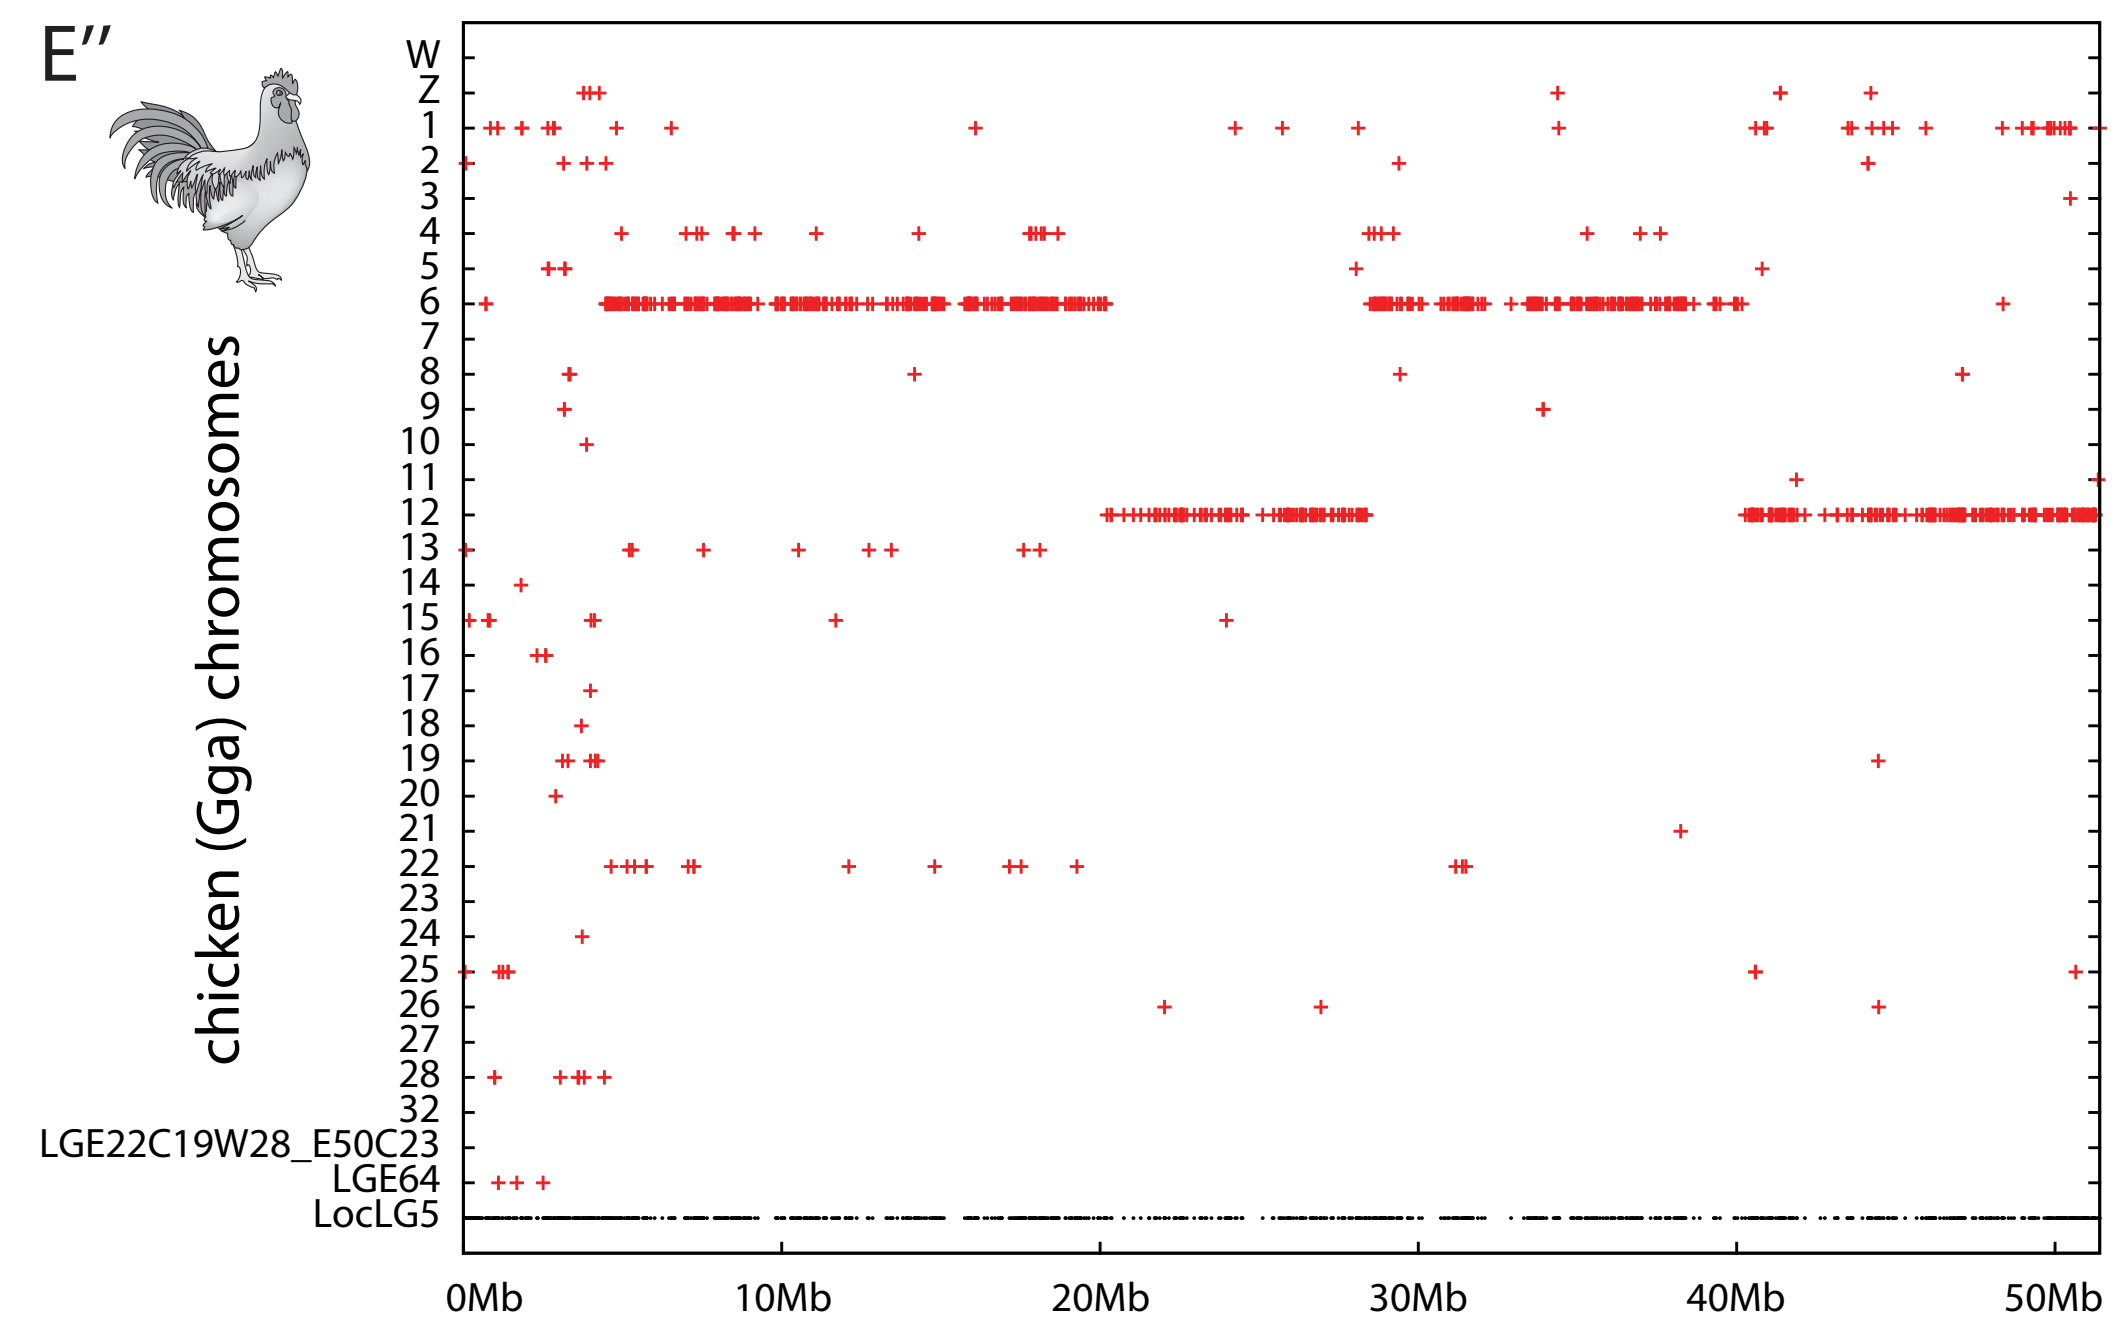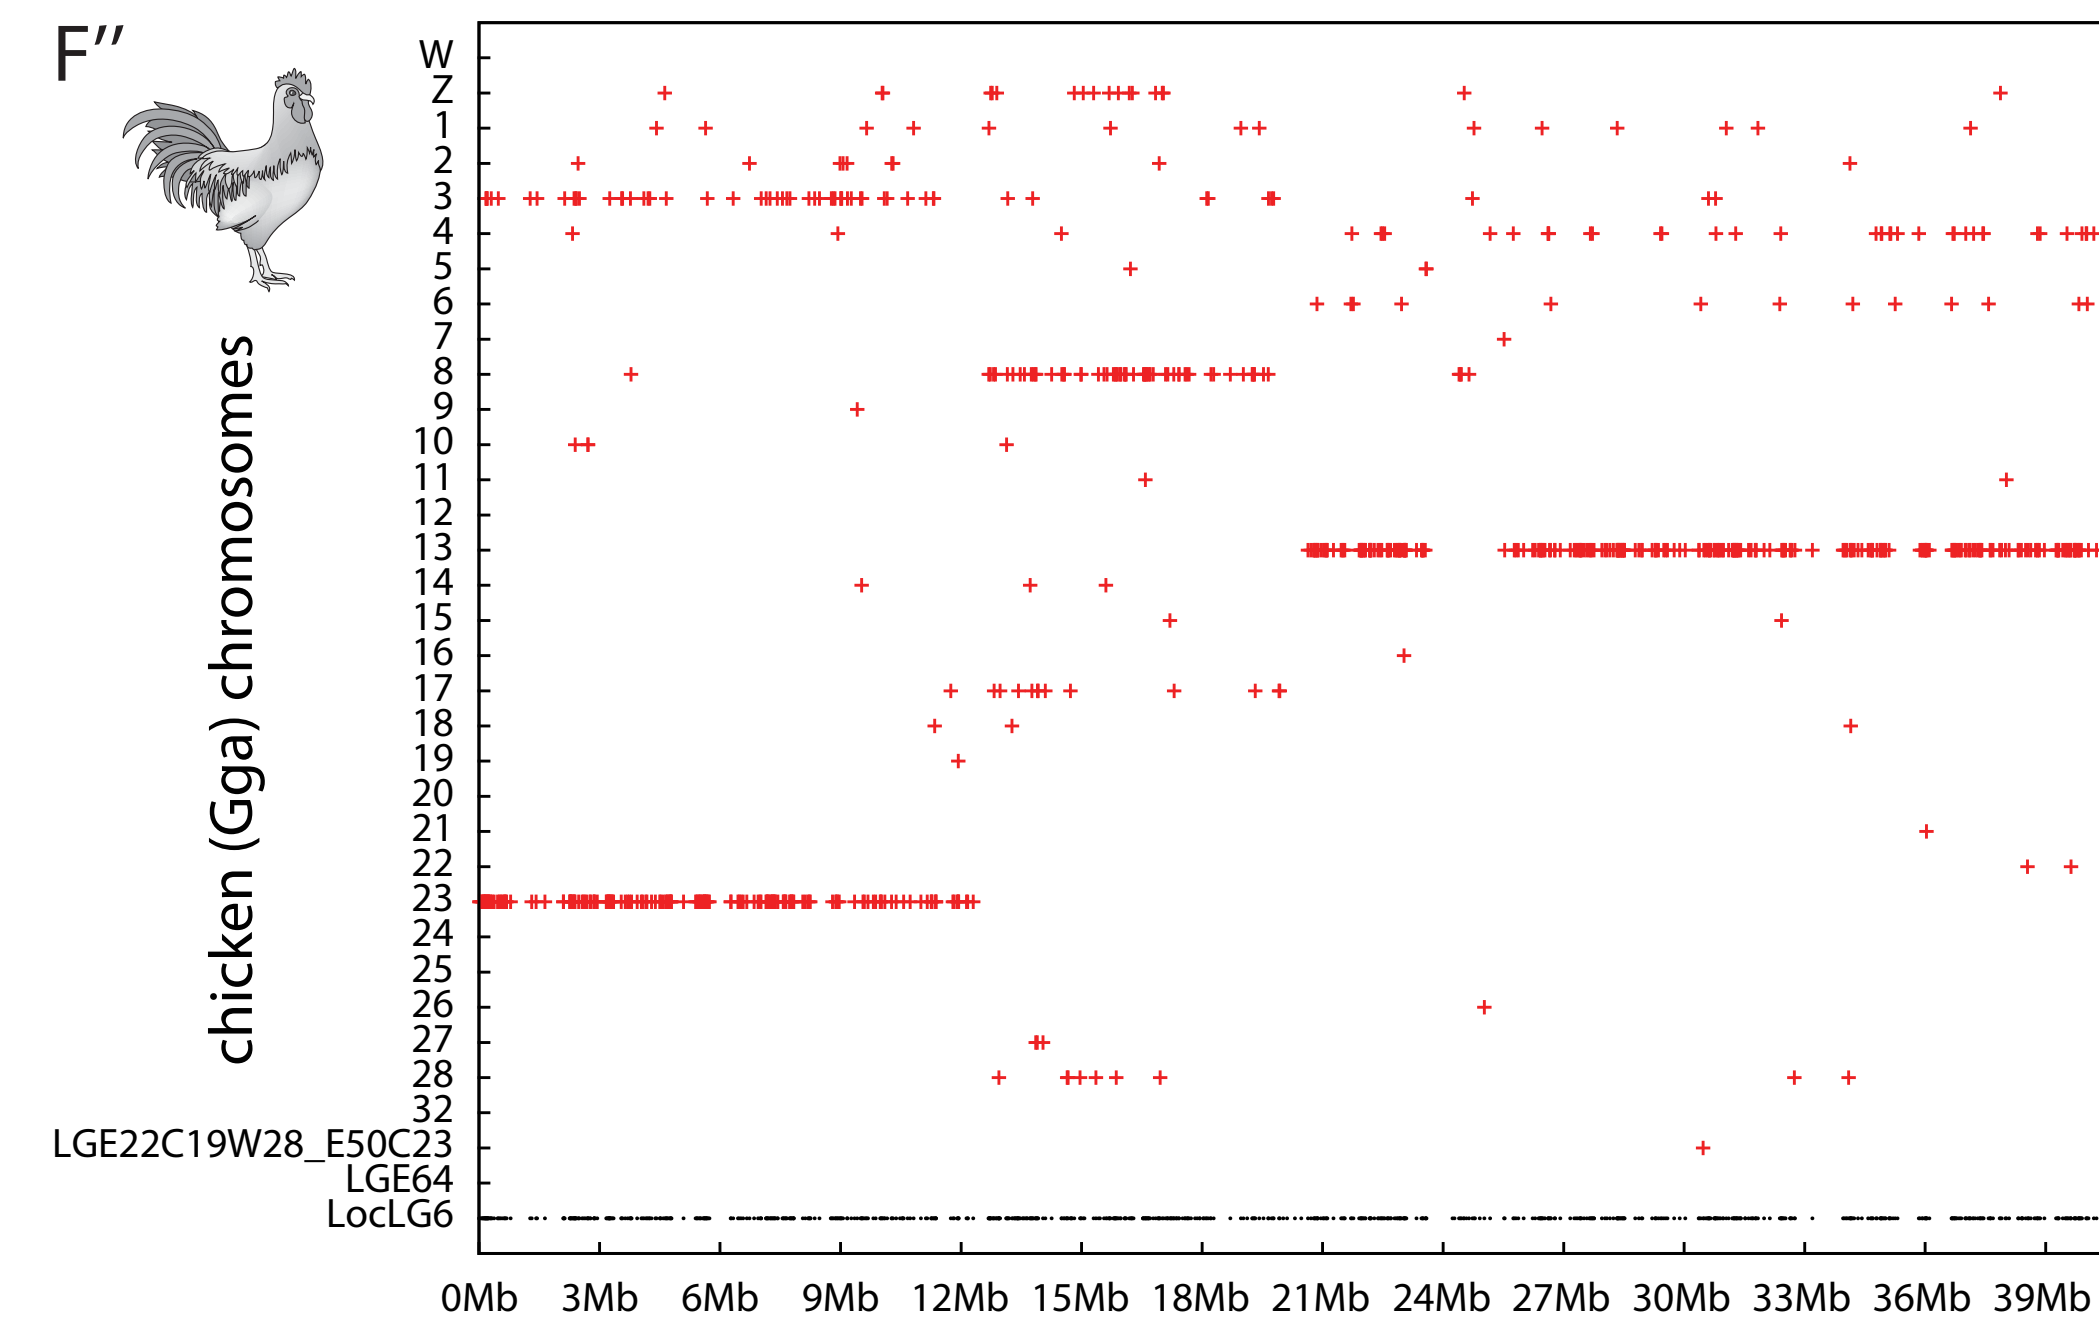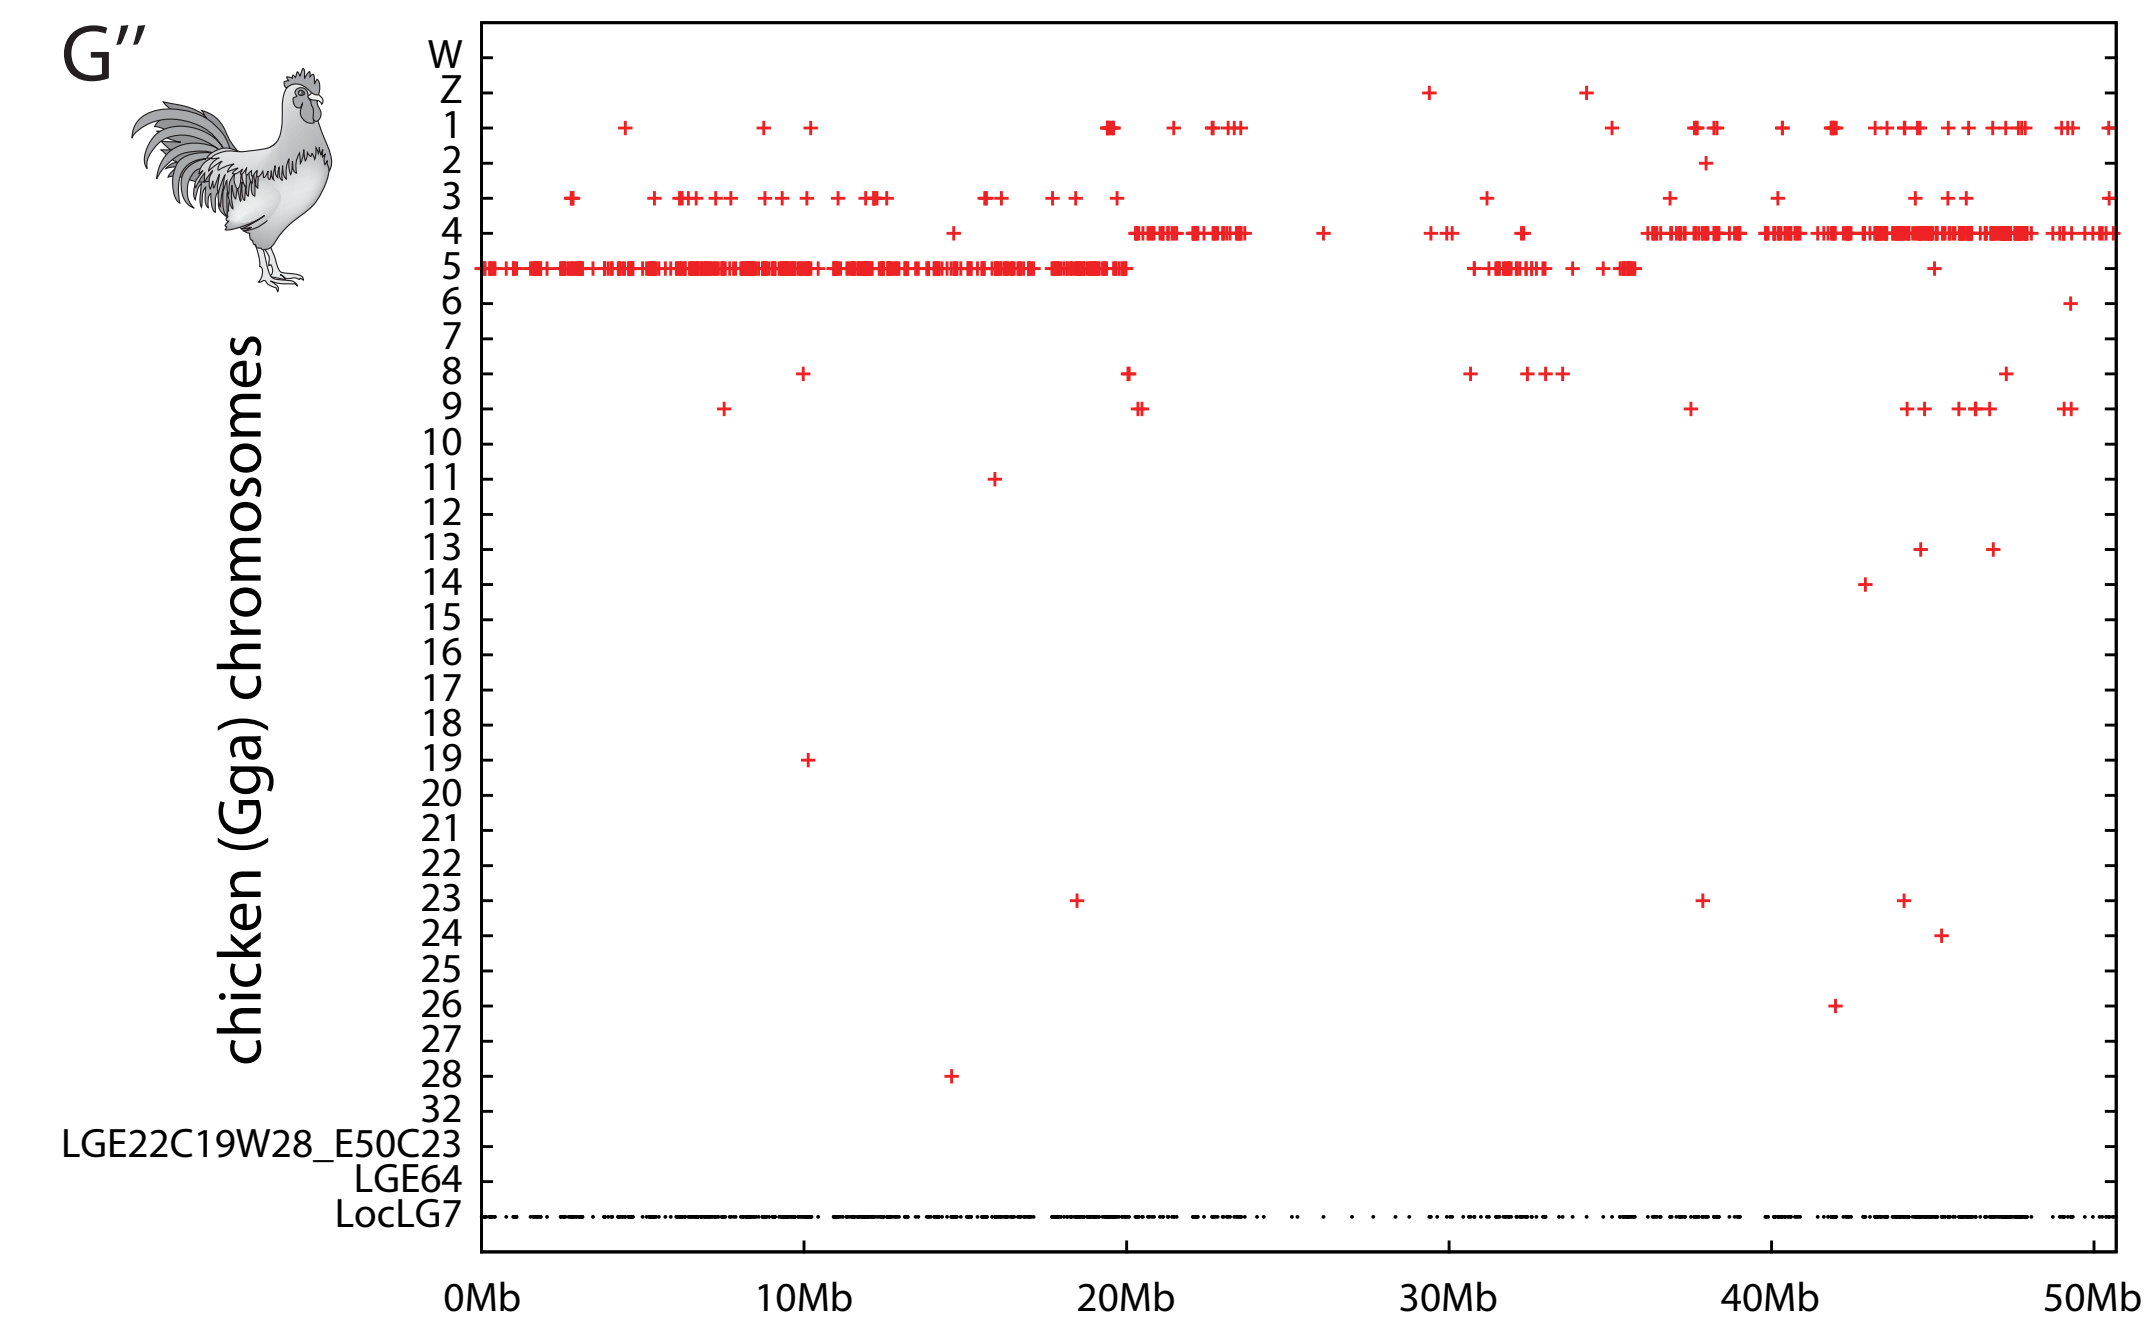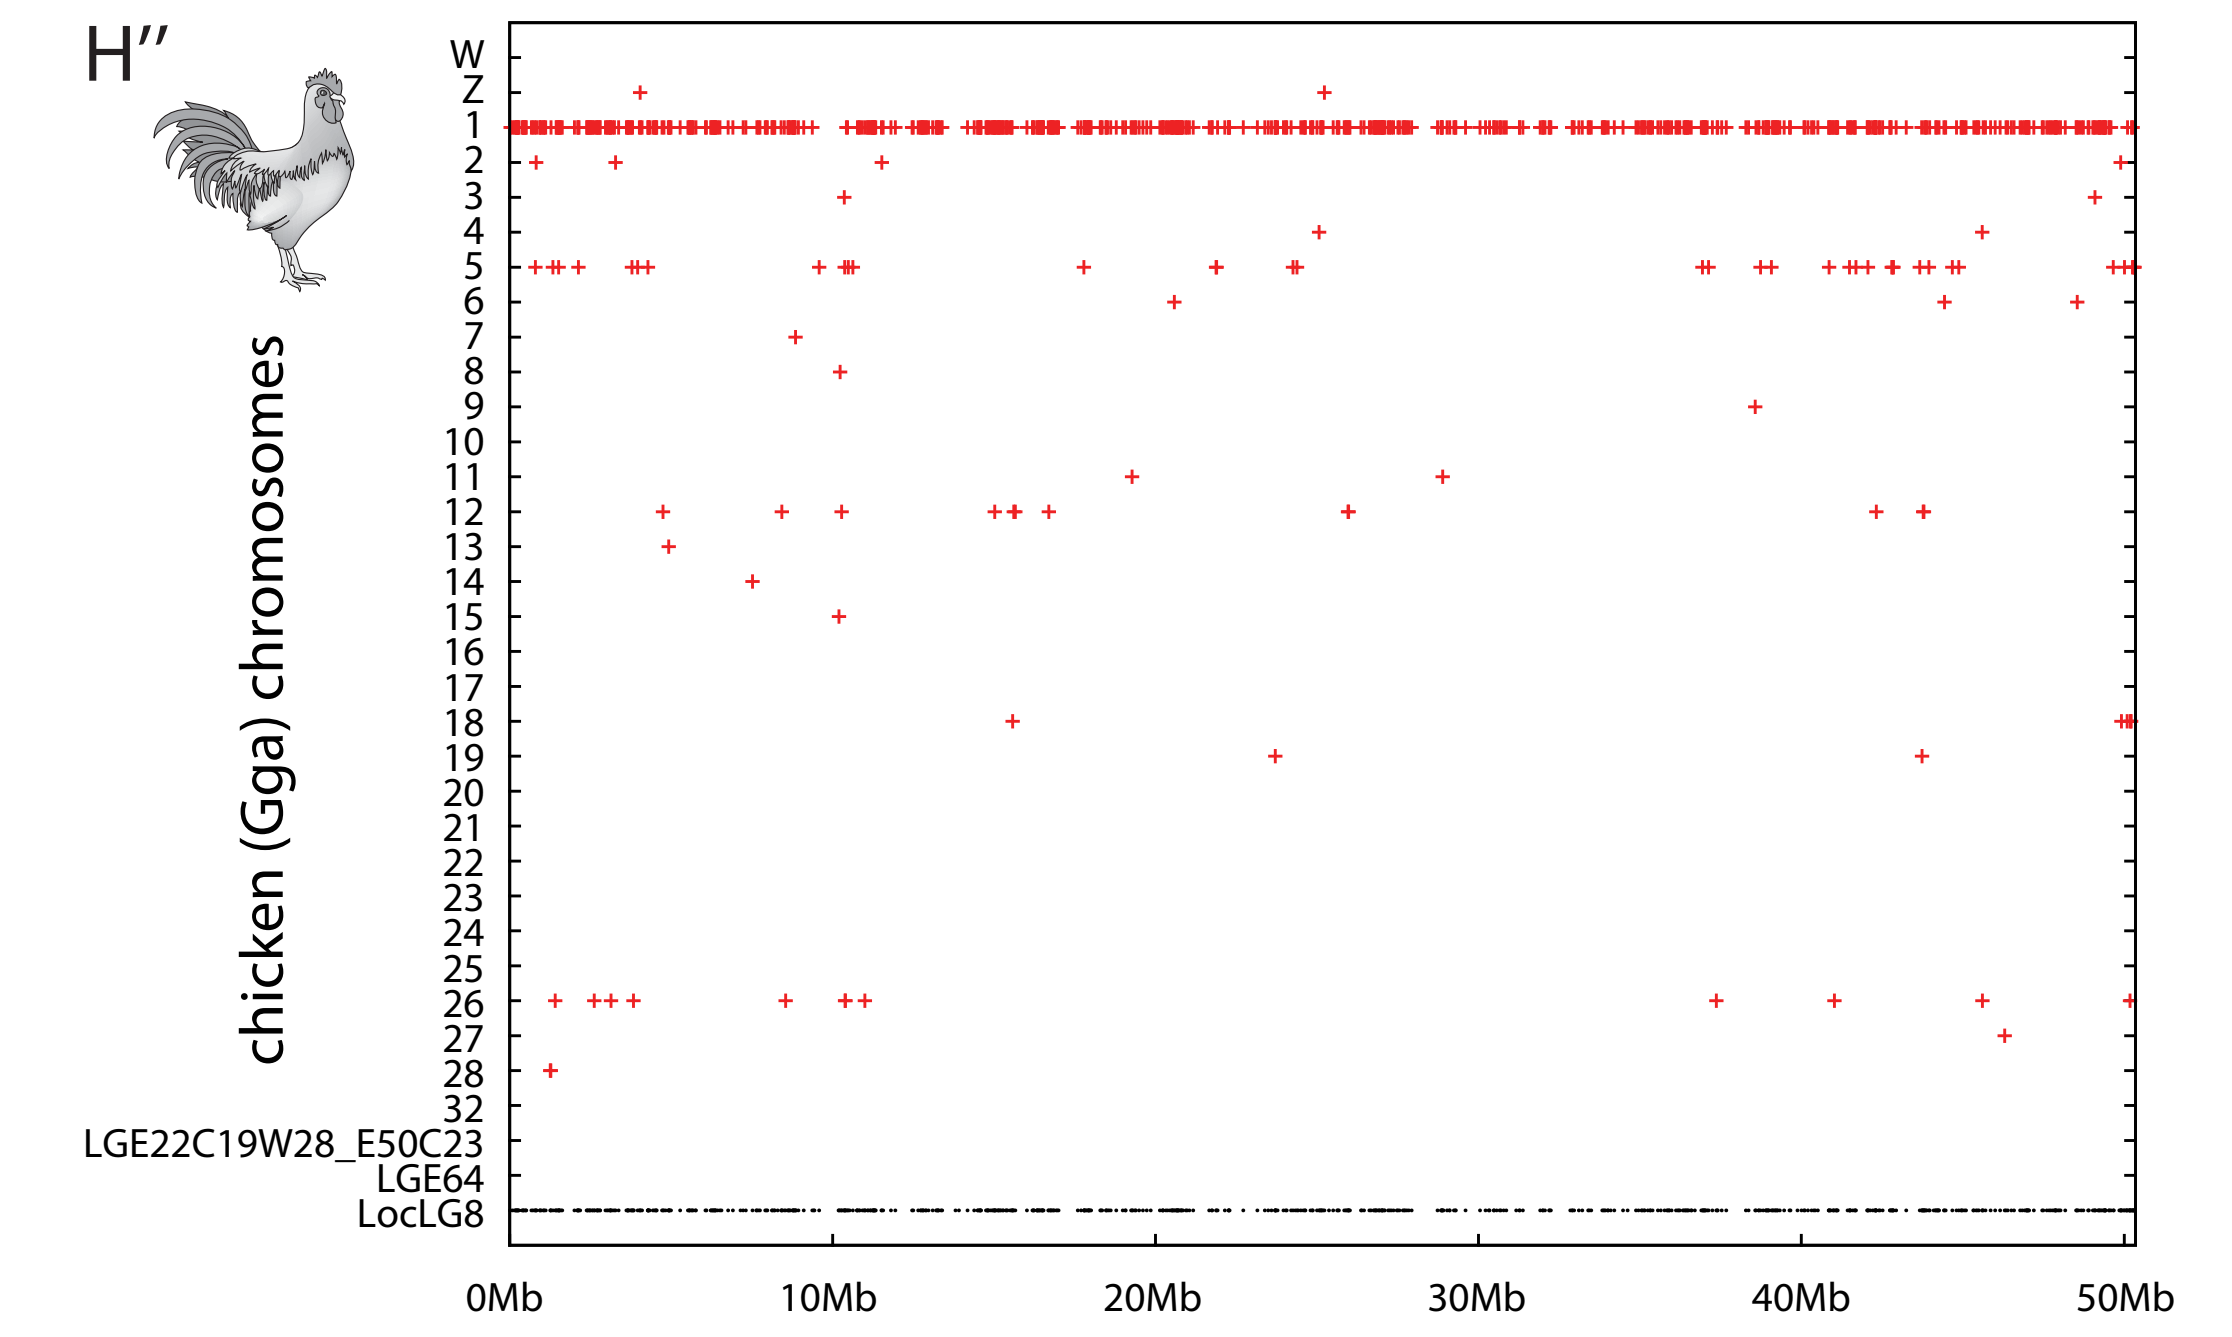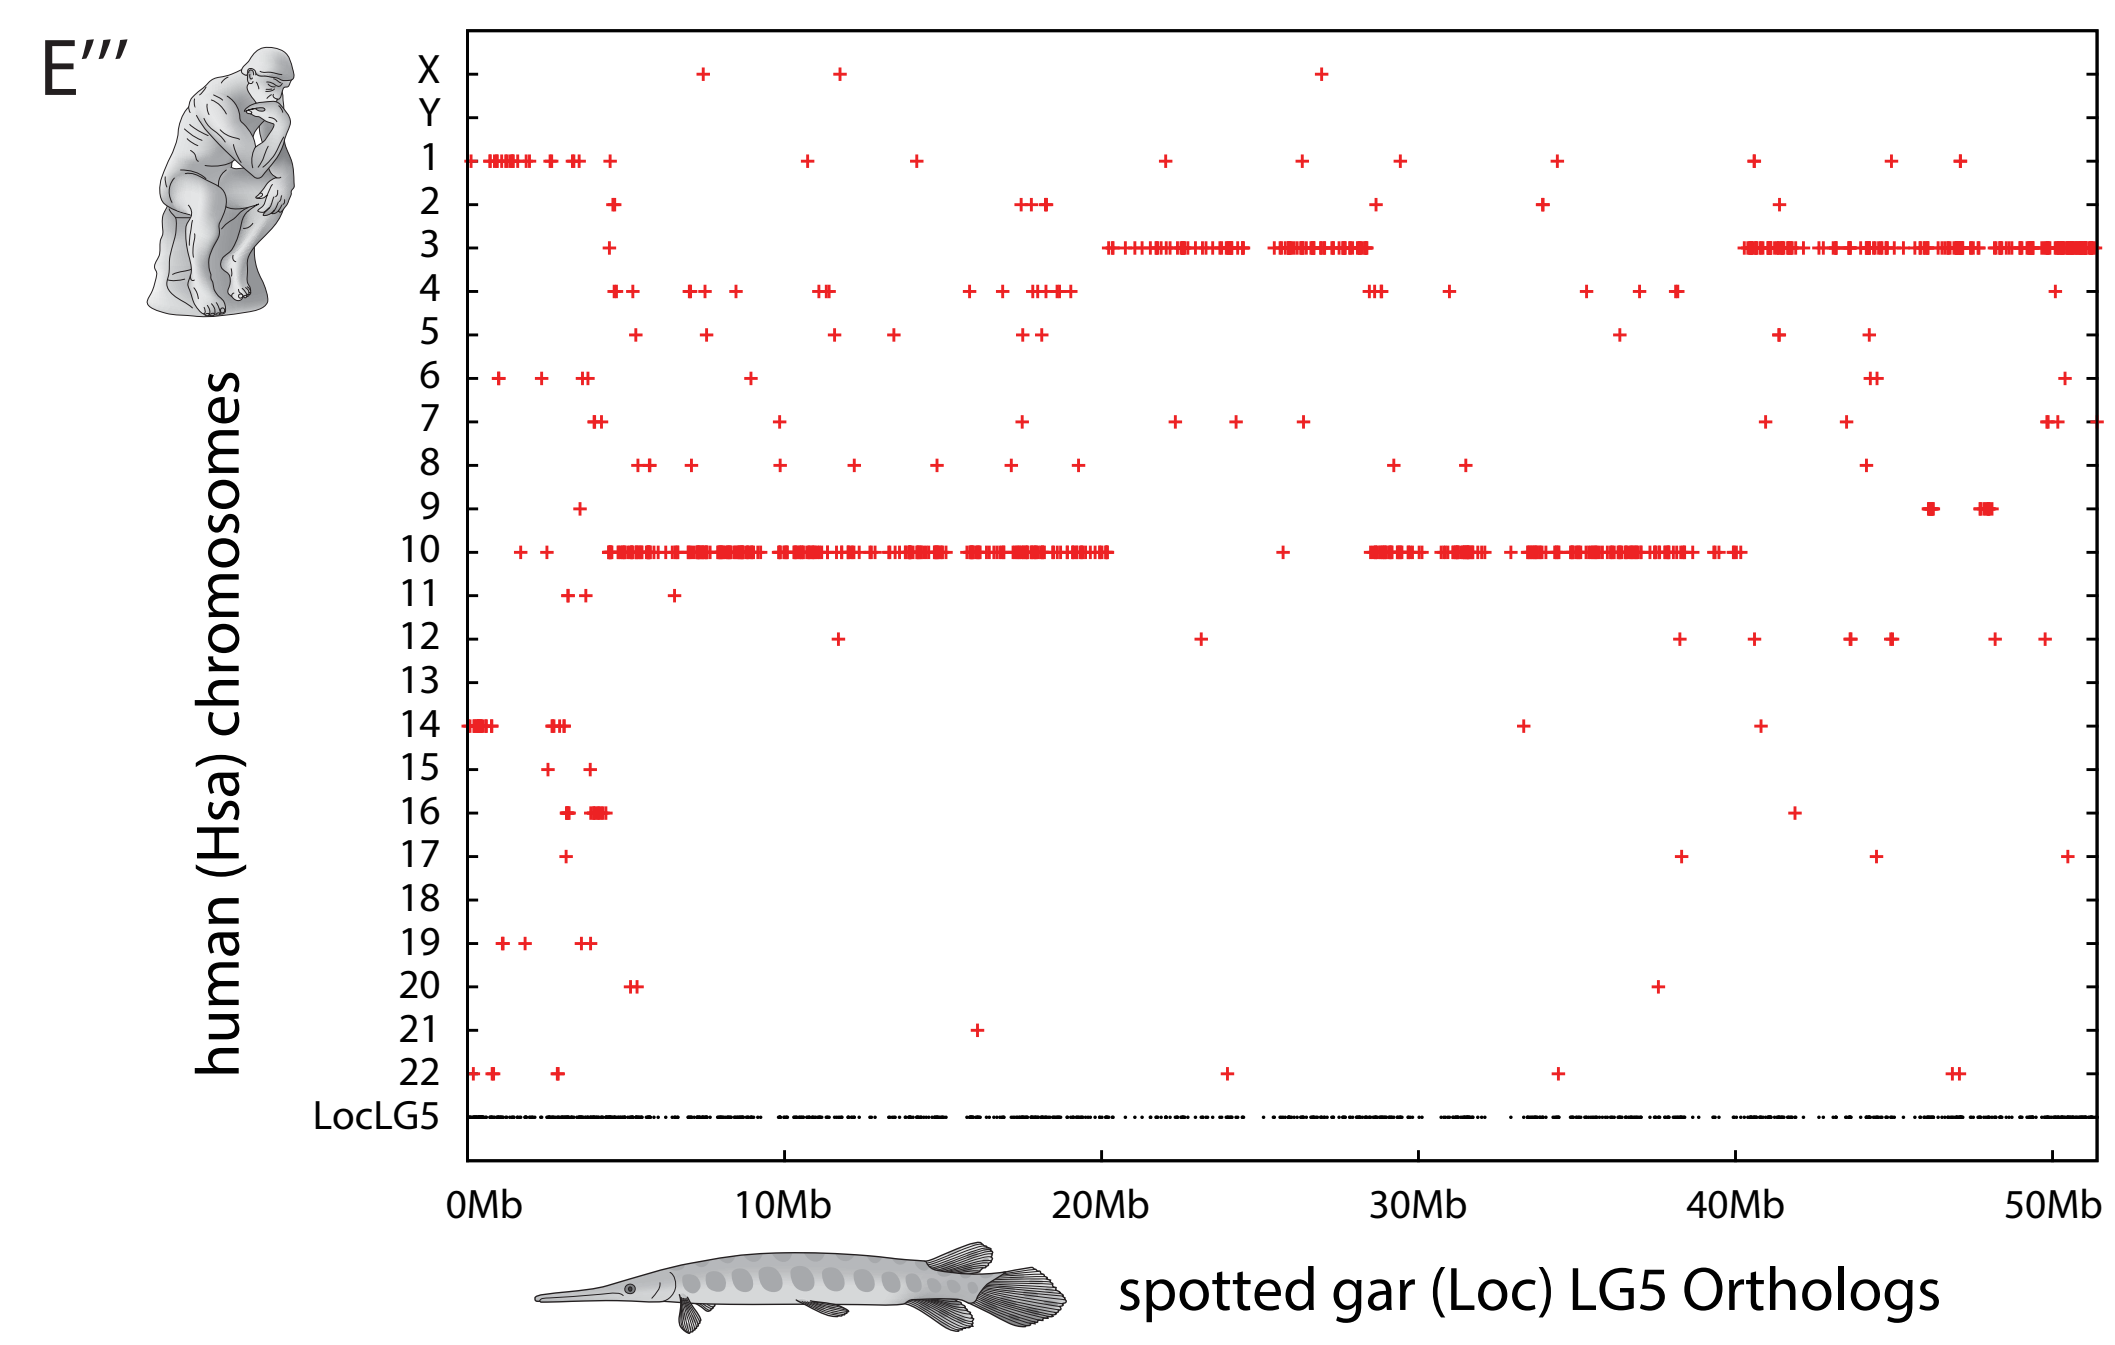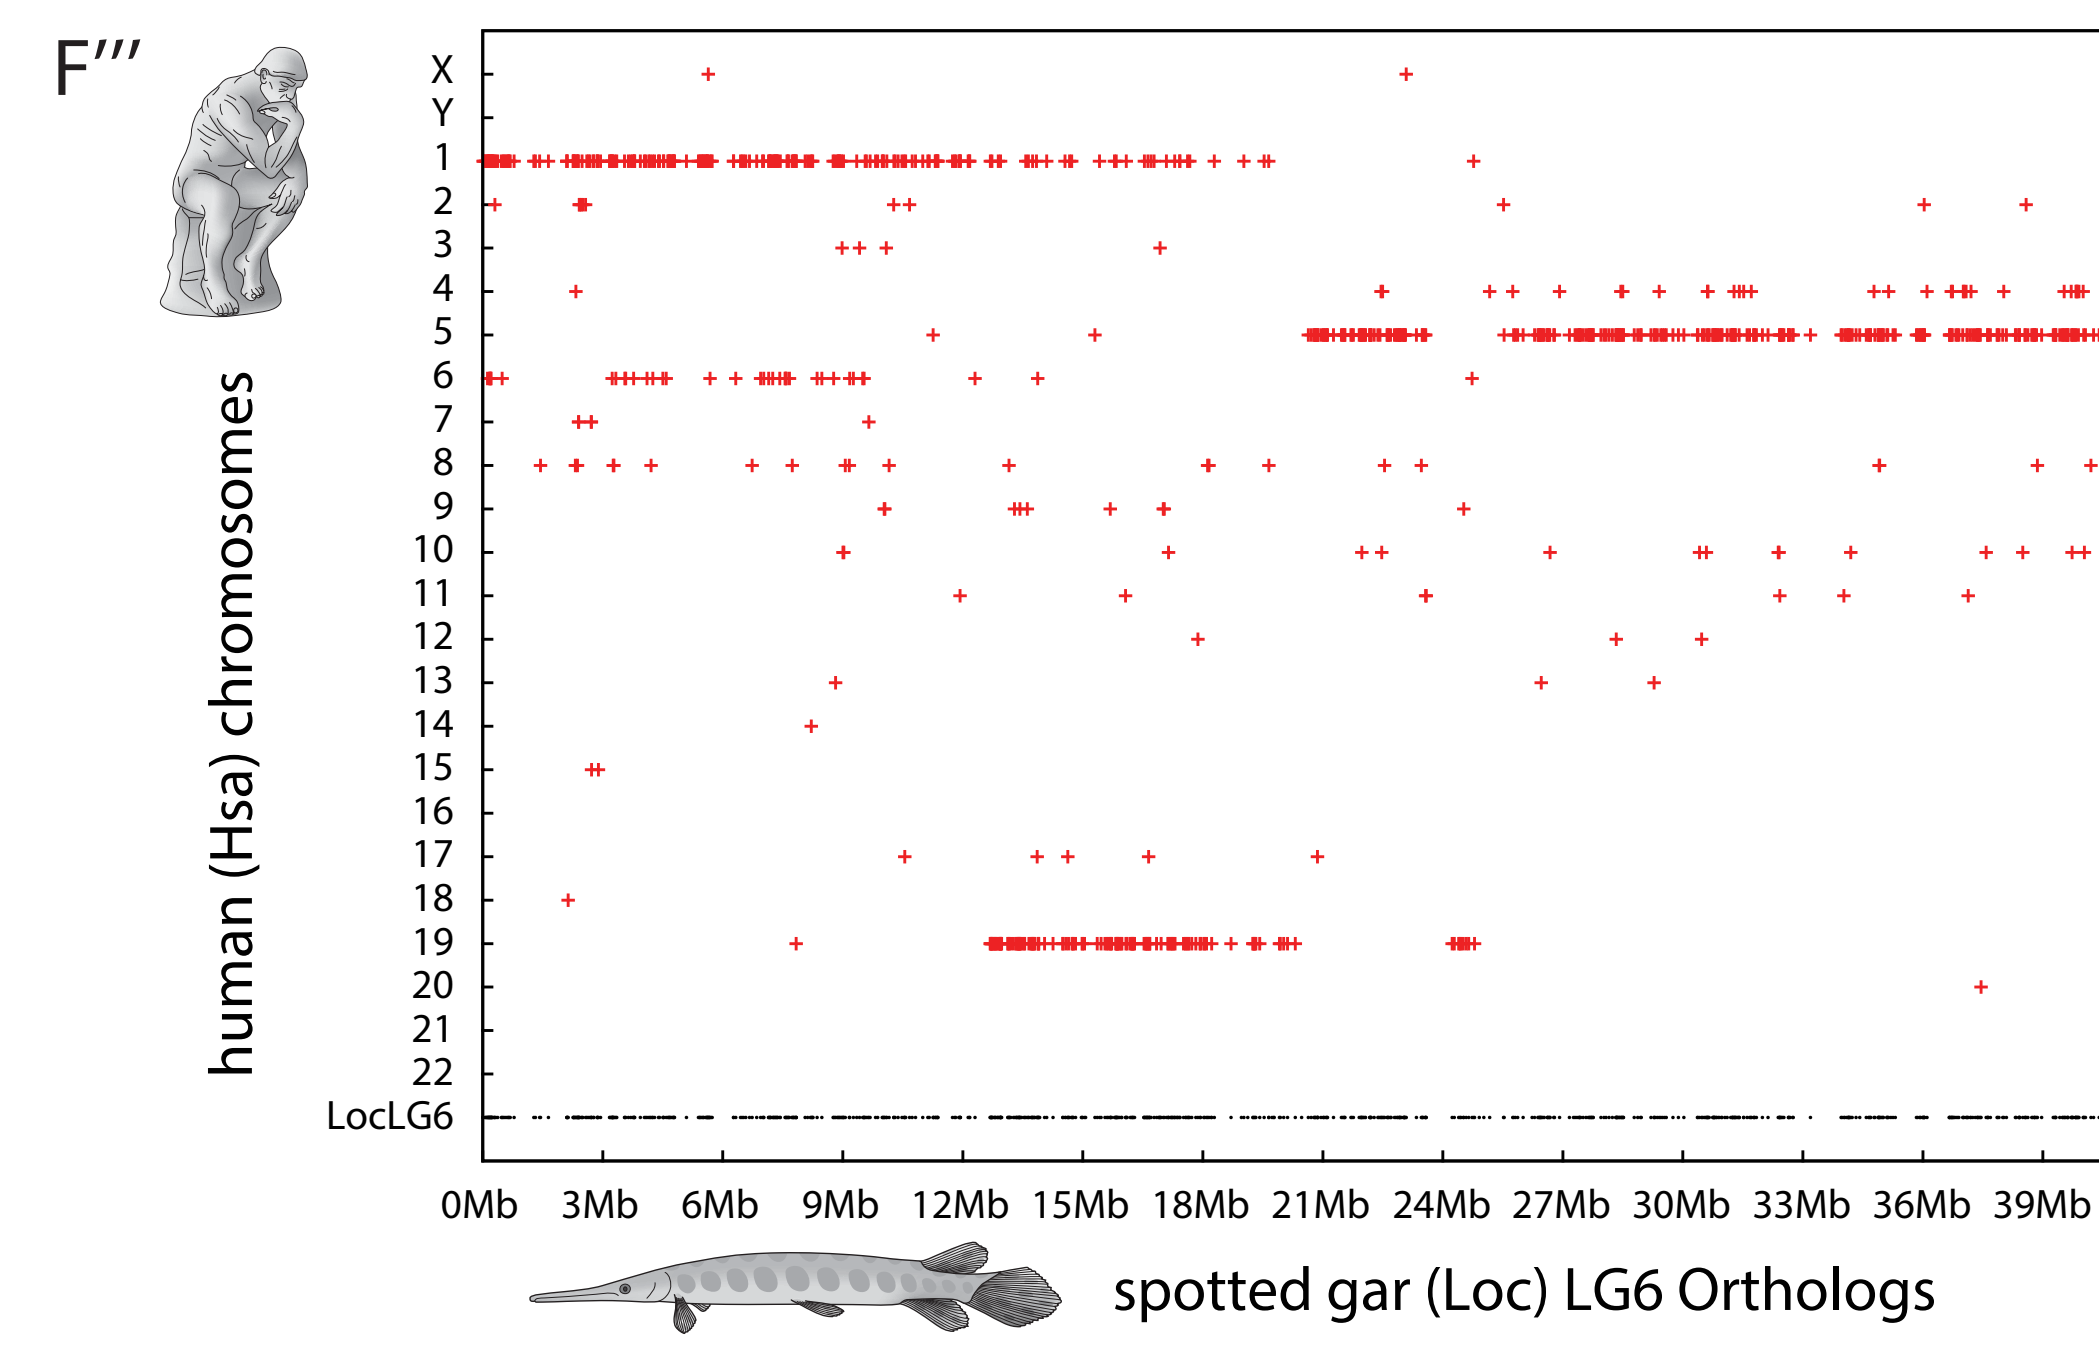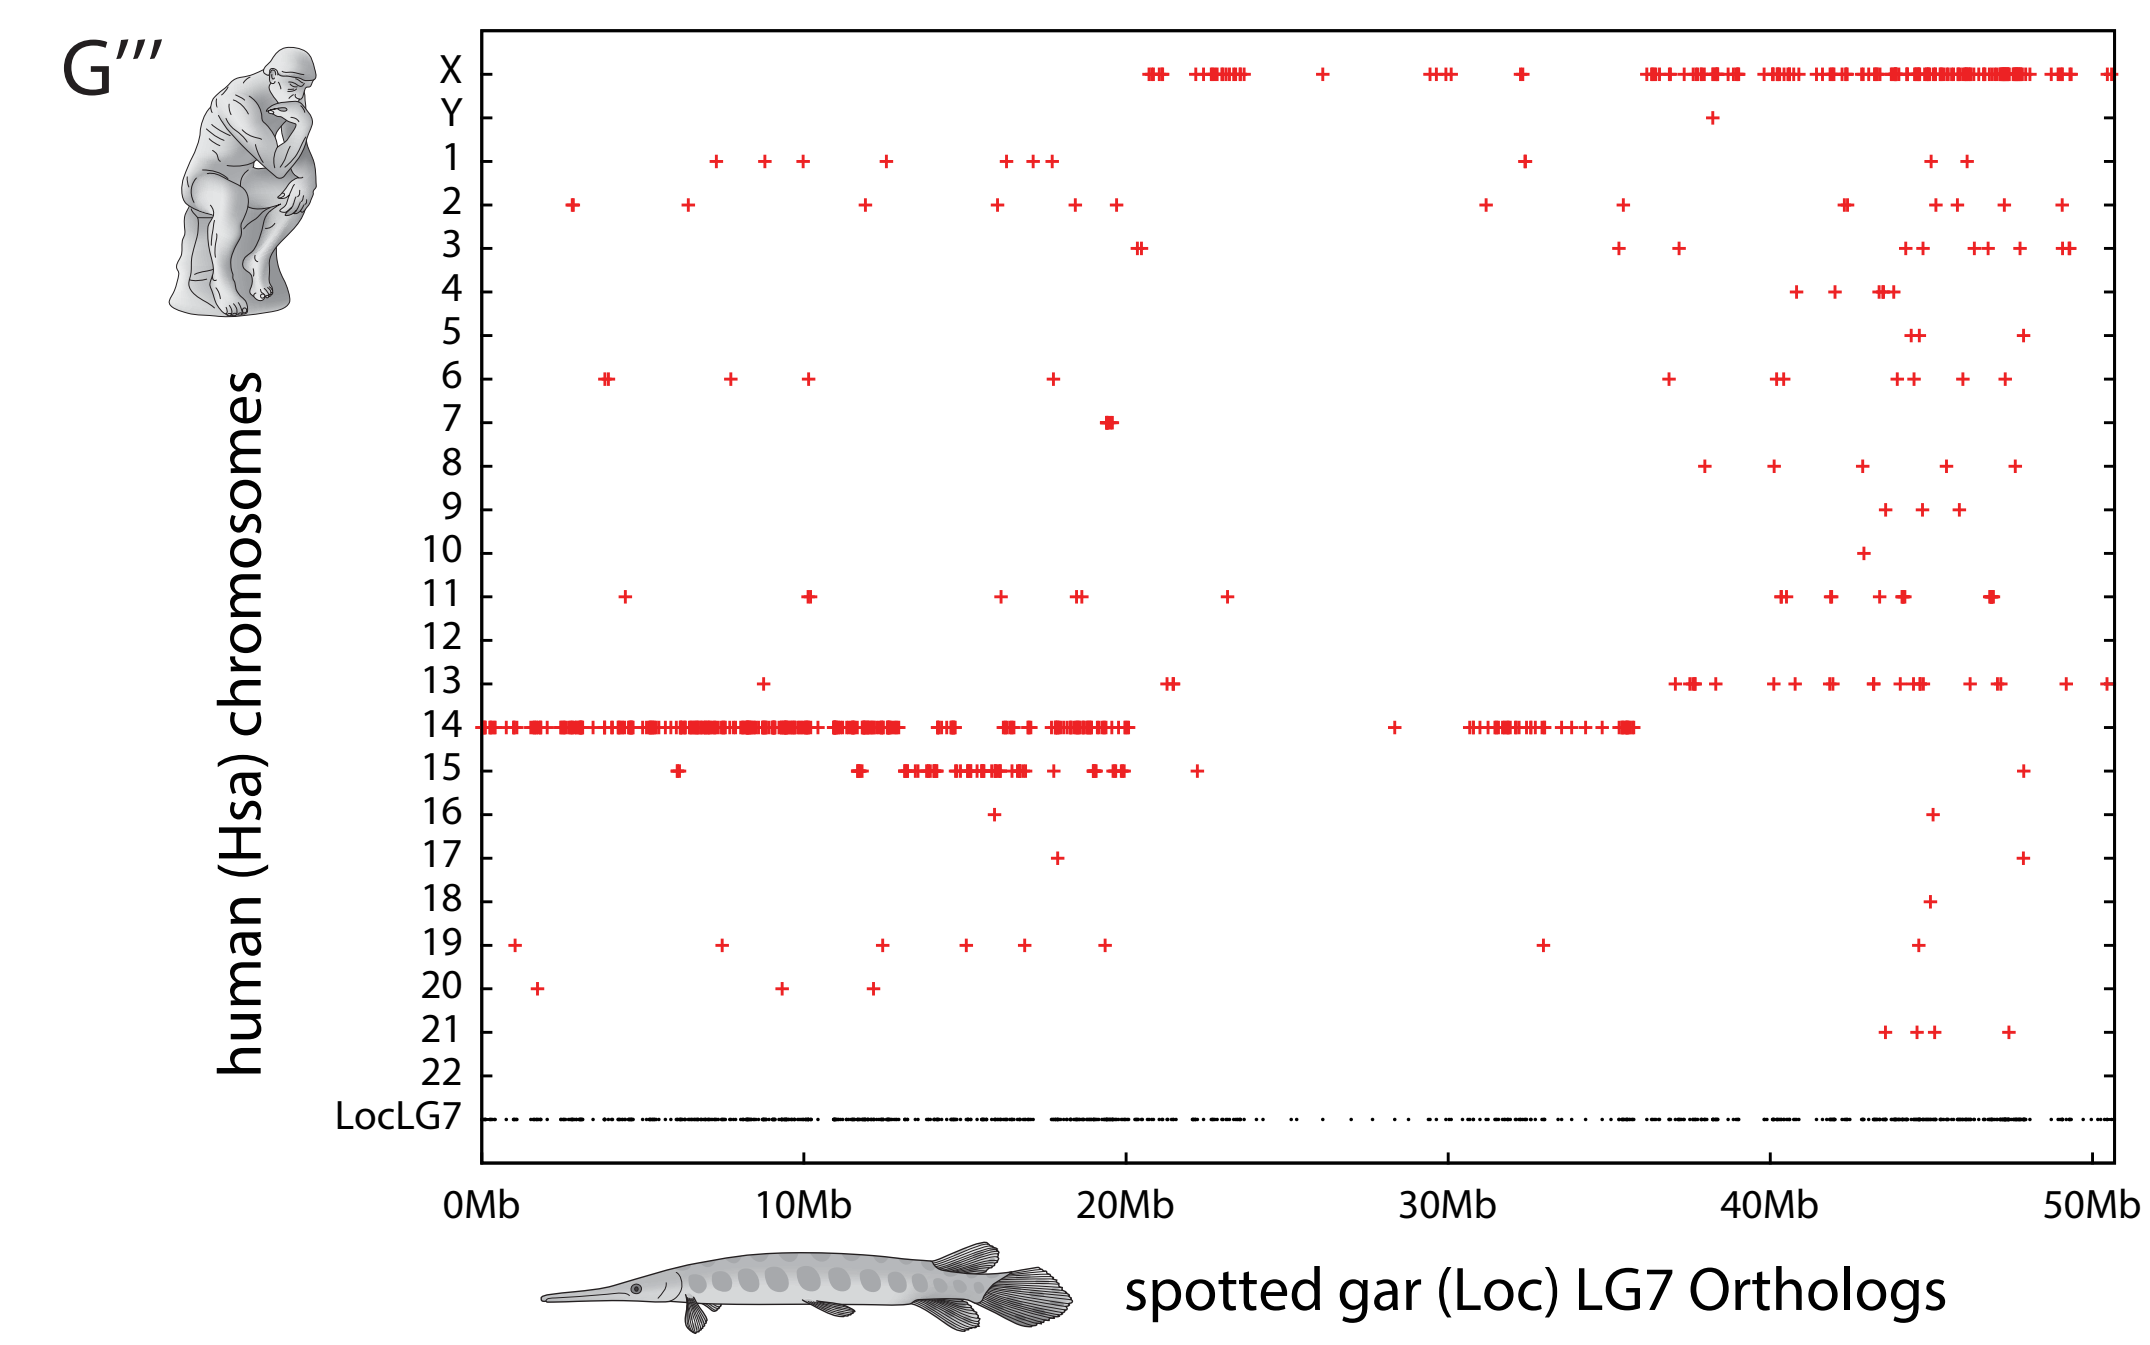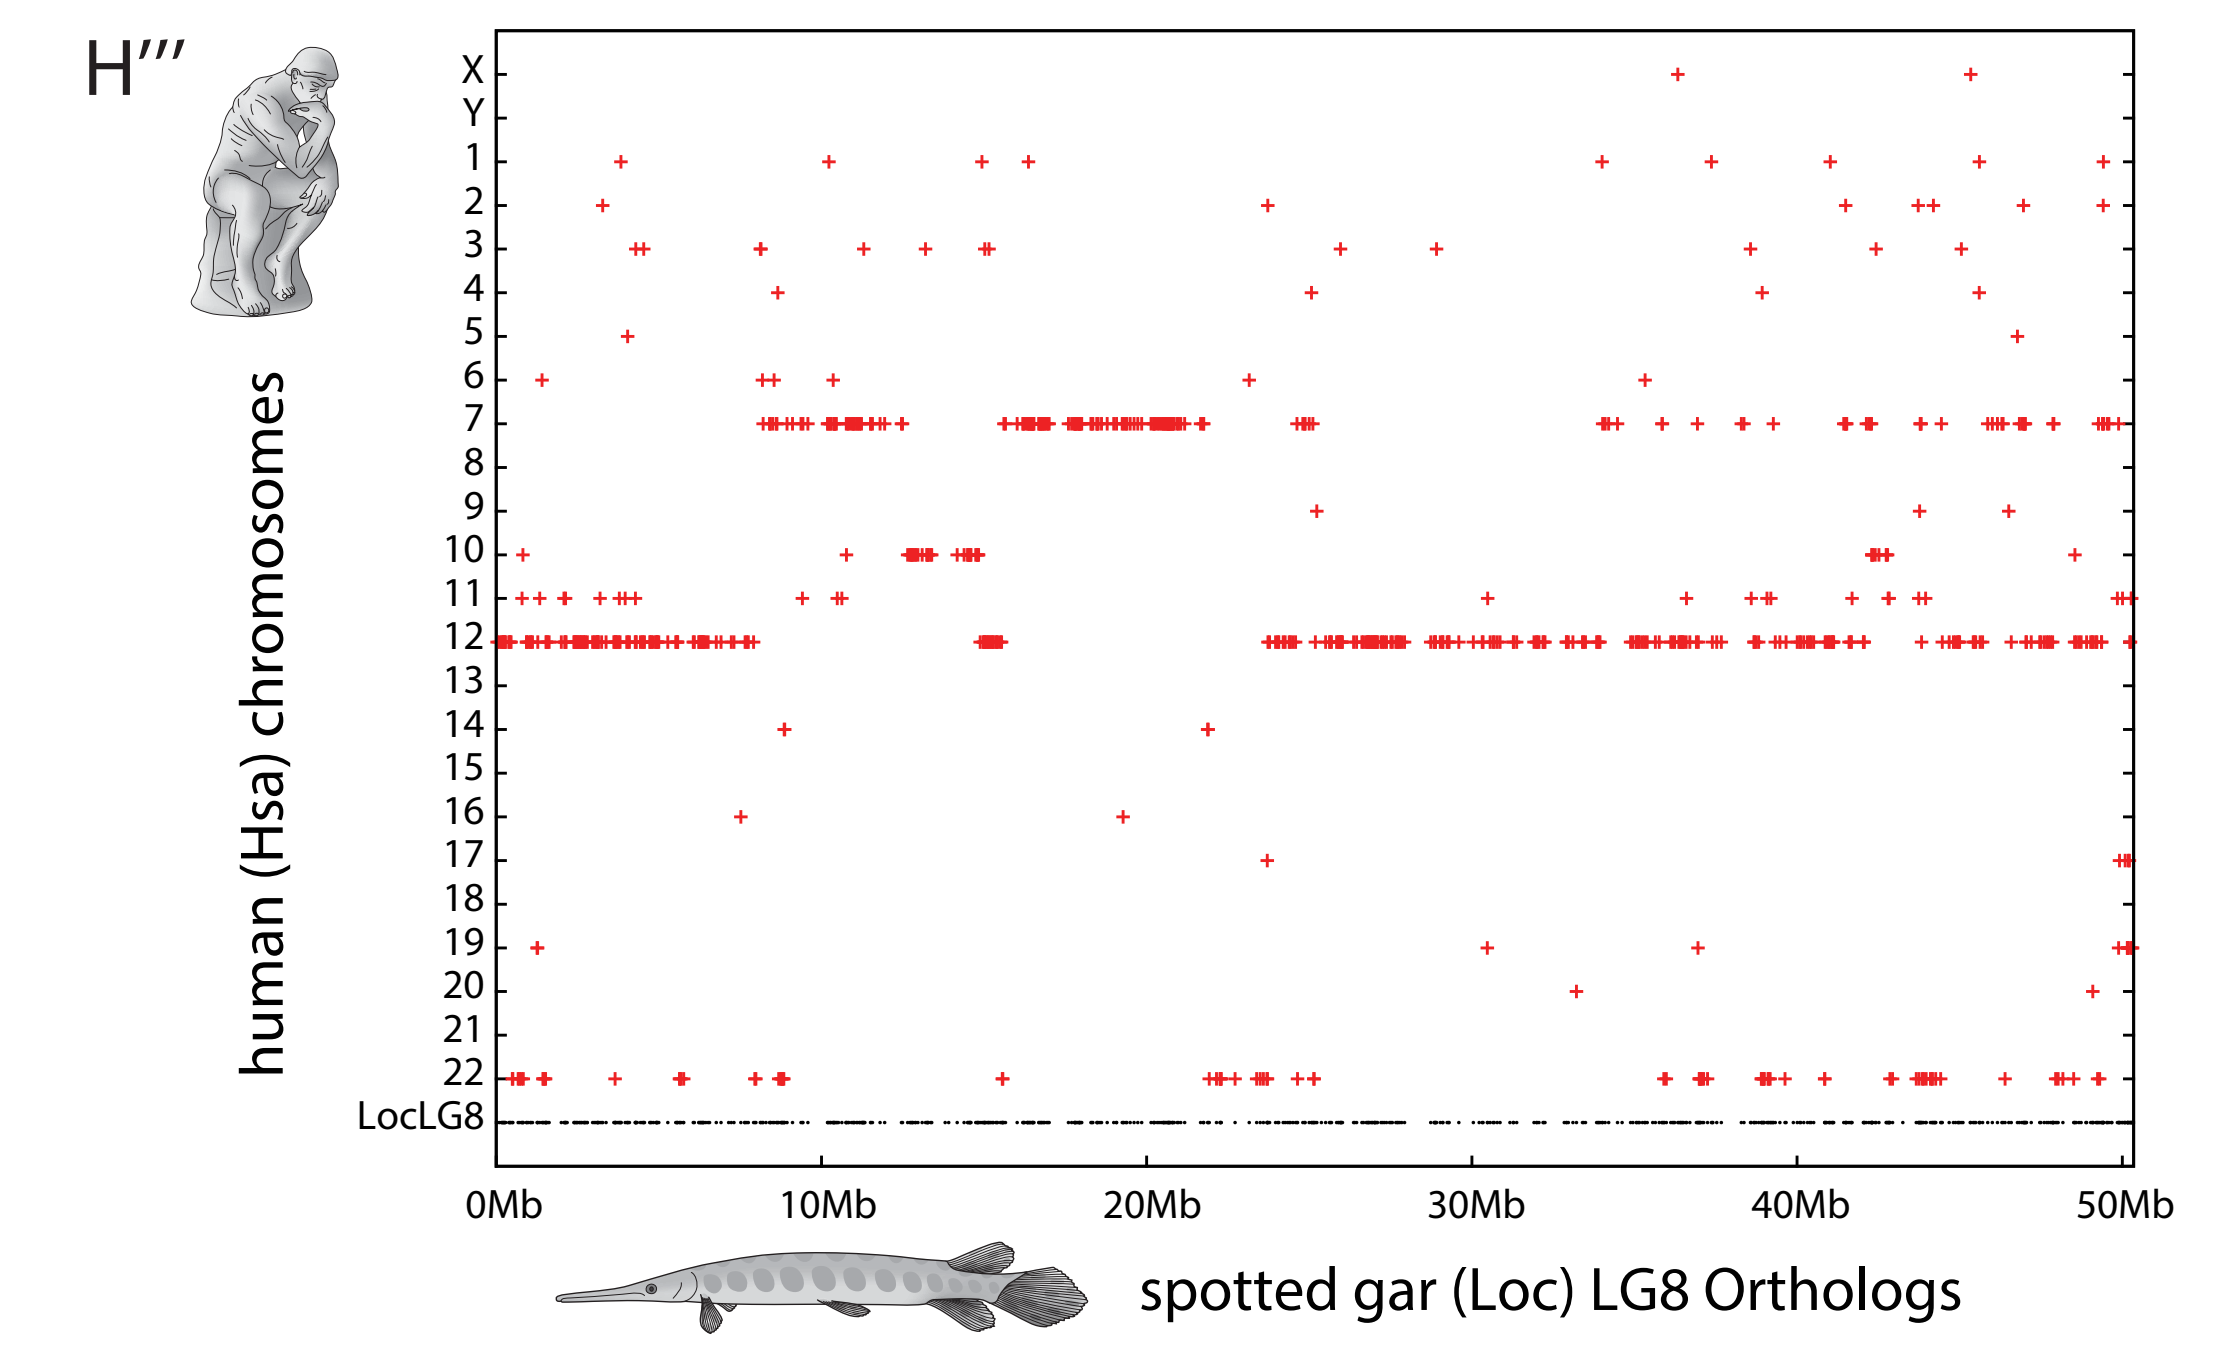

I Spotted Gar Linkage Group 9

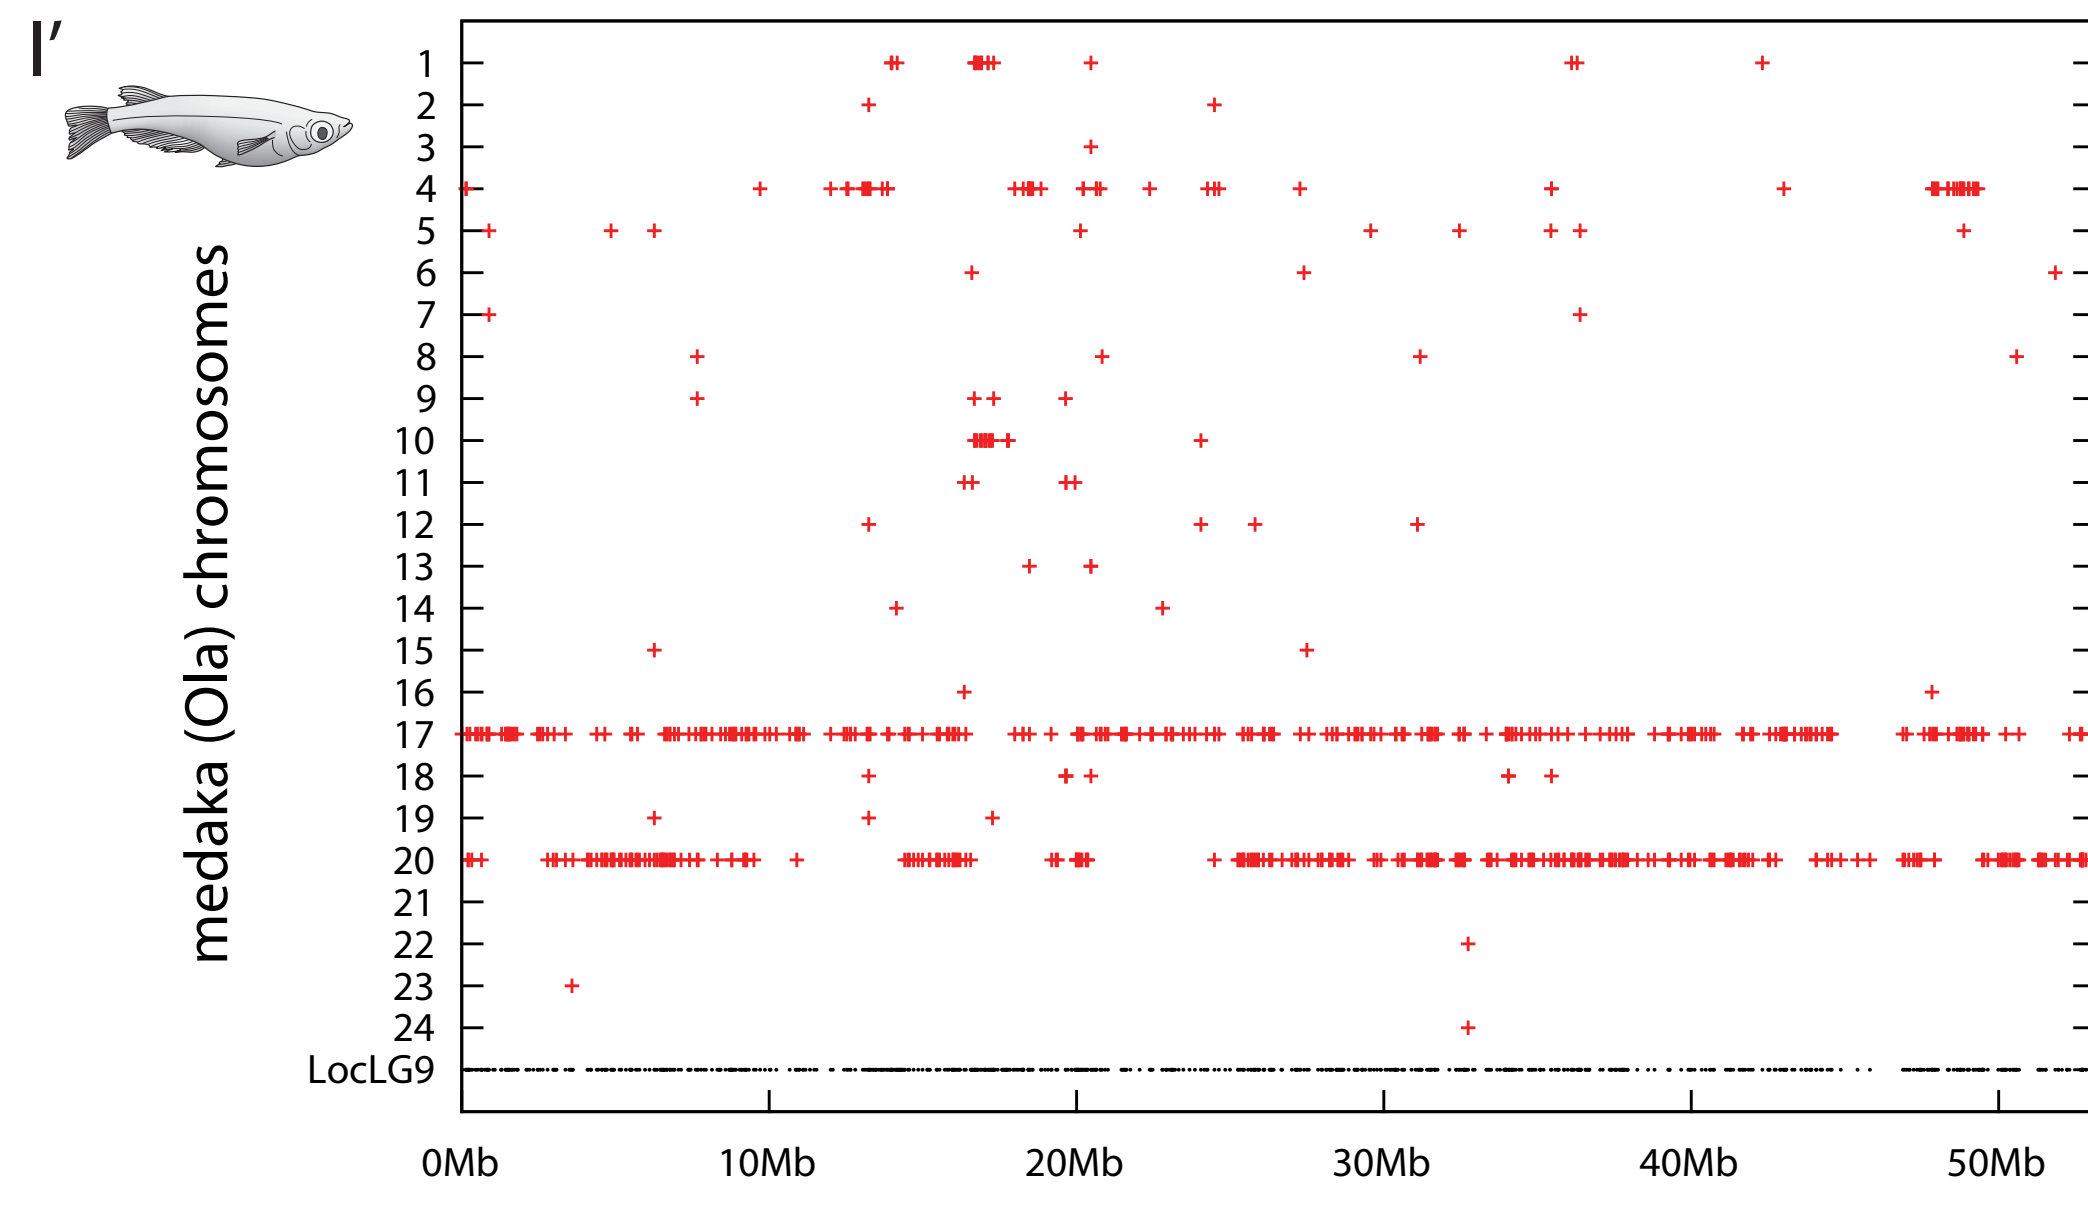

J Spotted Gar Linkage Group 10

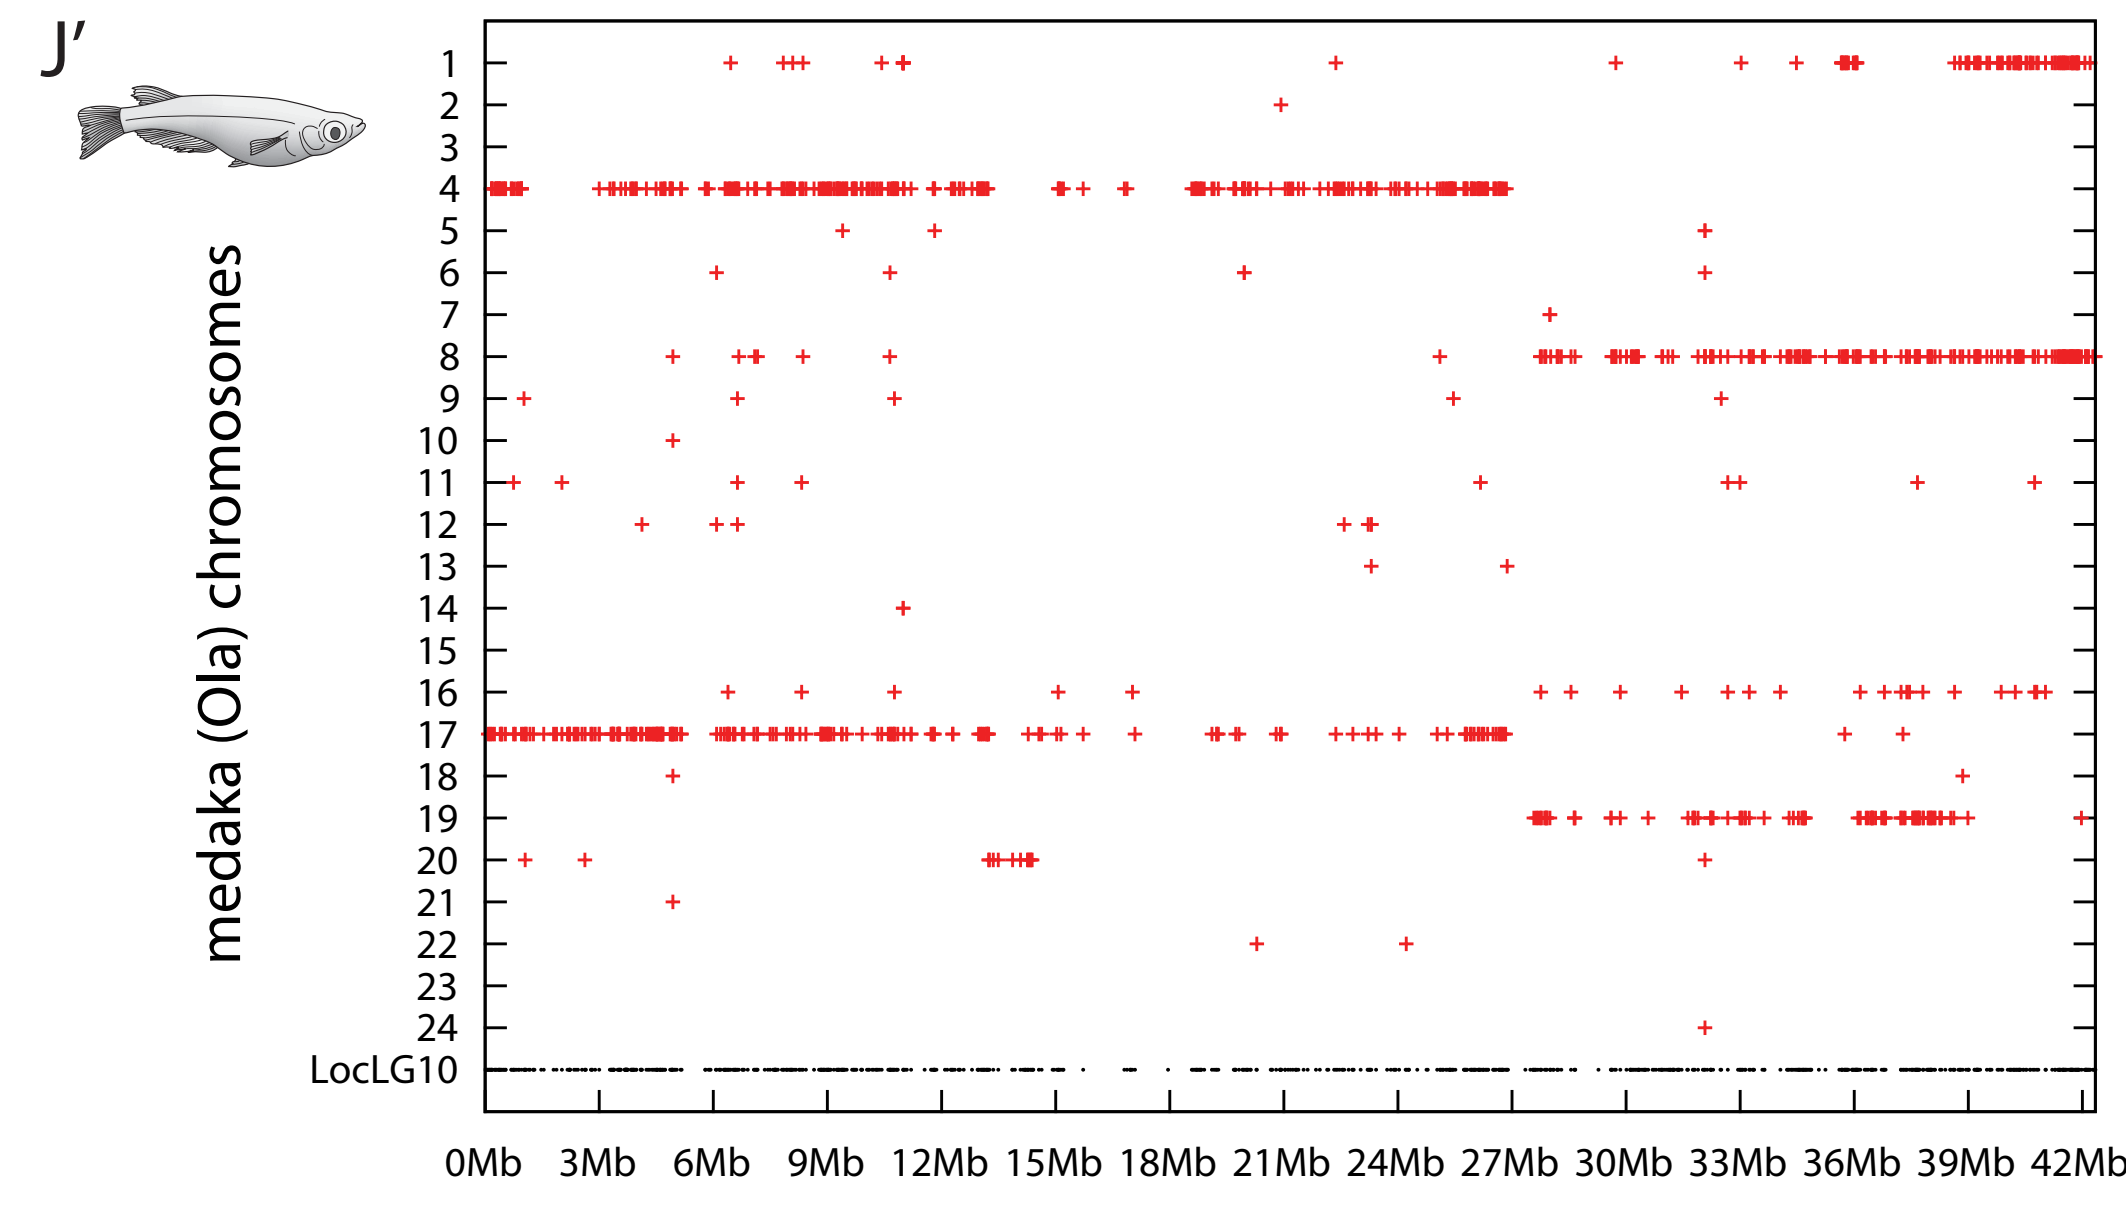

K Spotted Gar Linkage Group 11

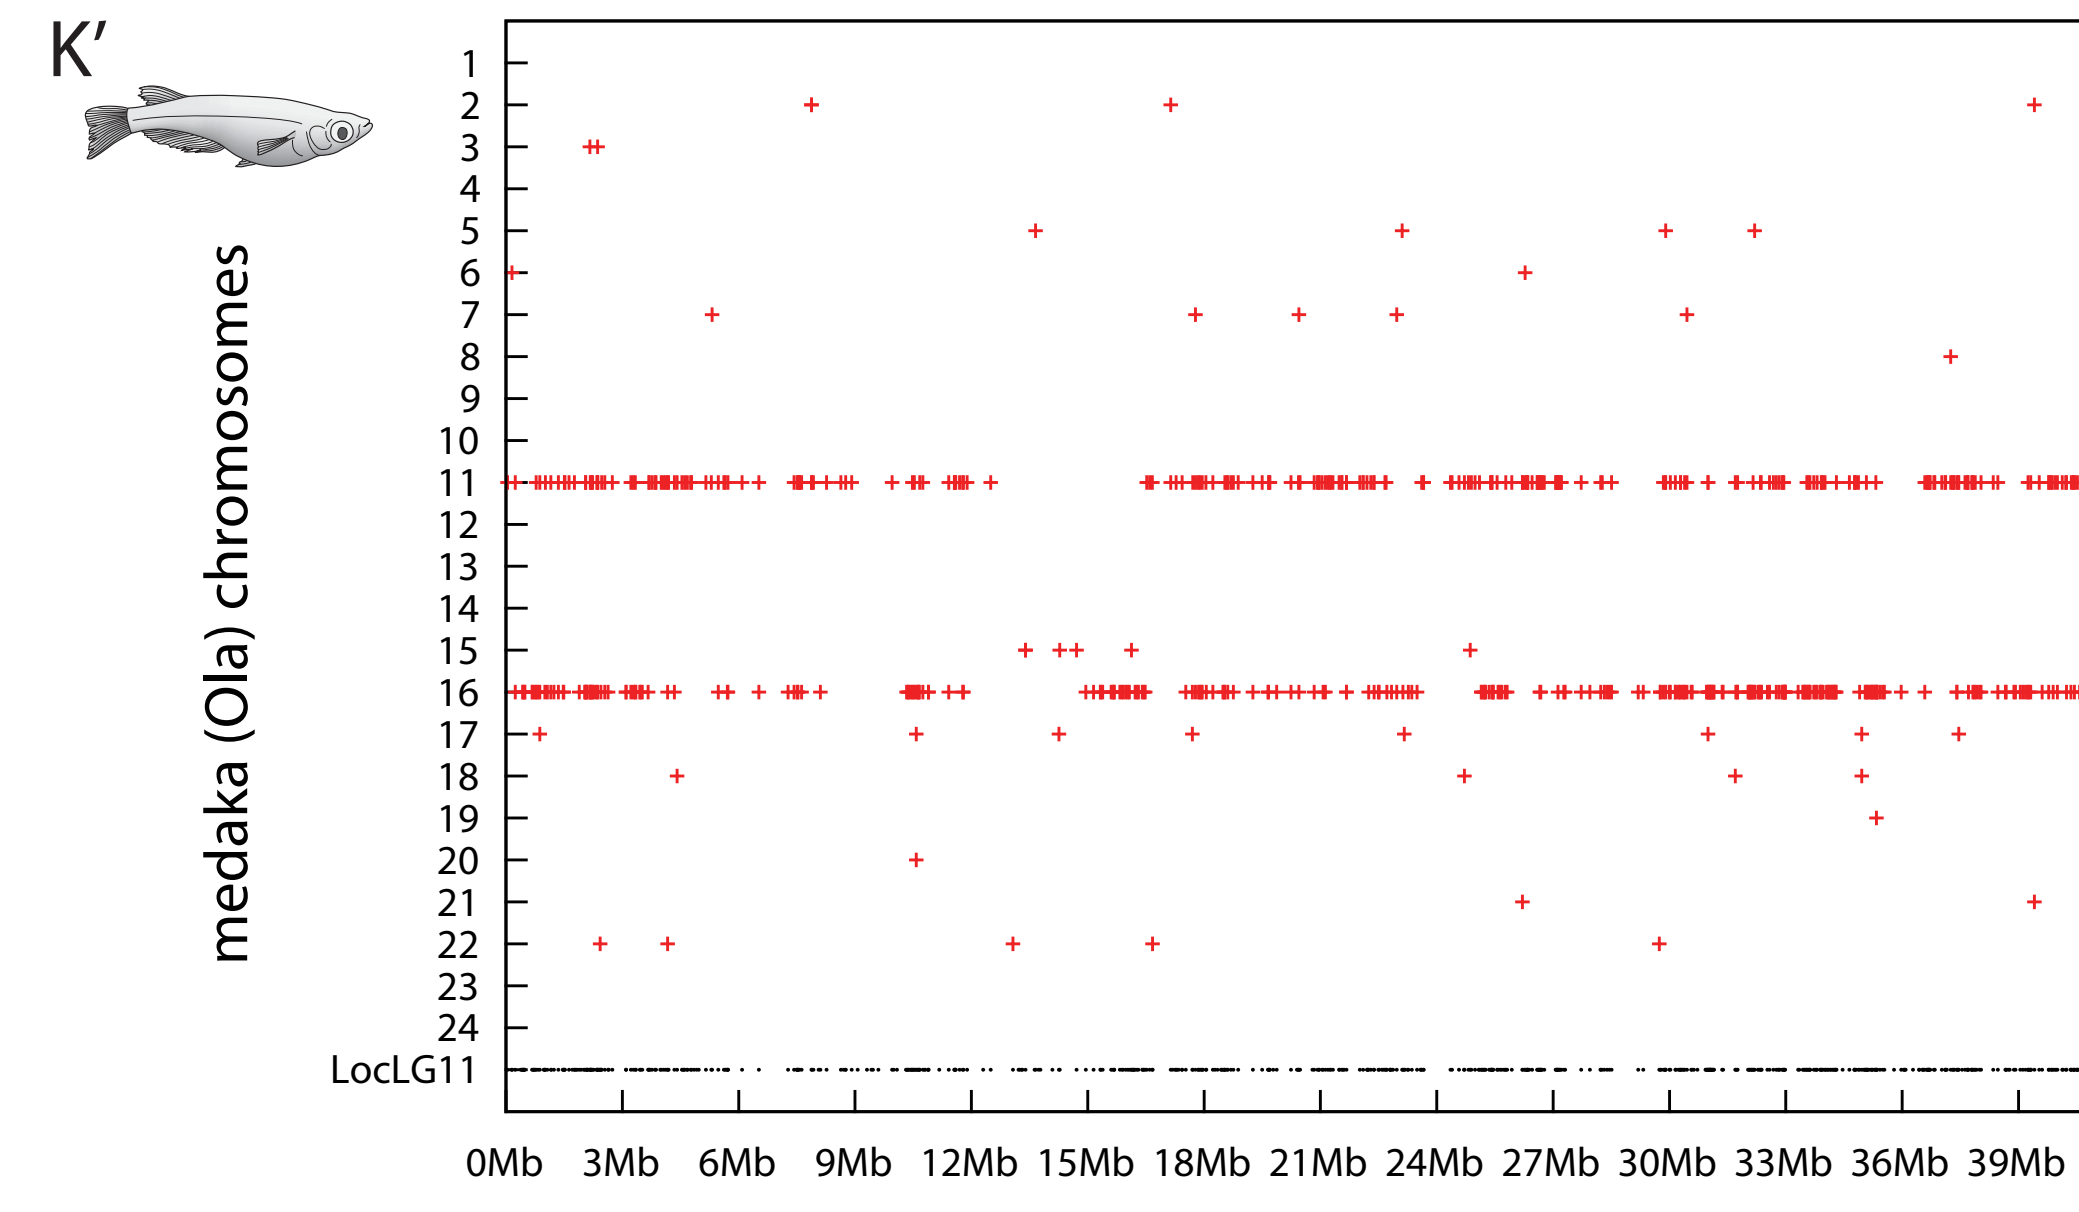

L Spotted Gar Linkage Group 12

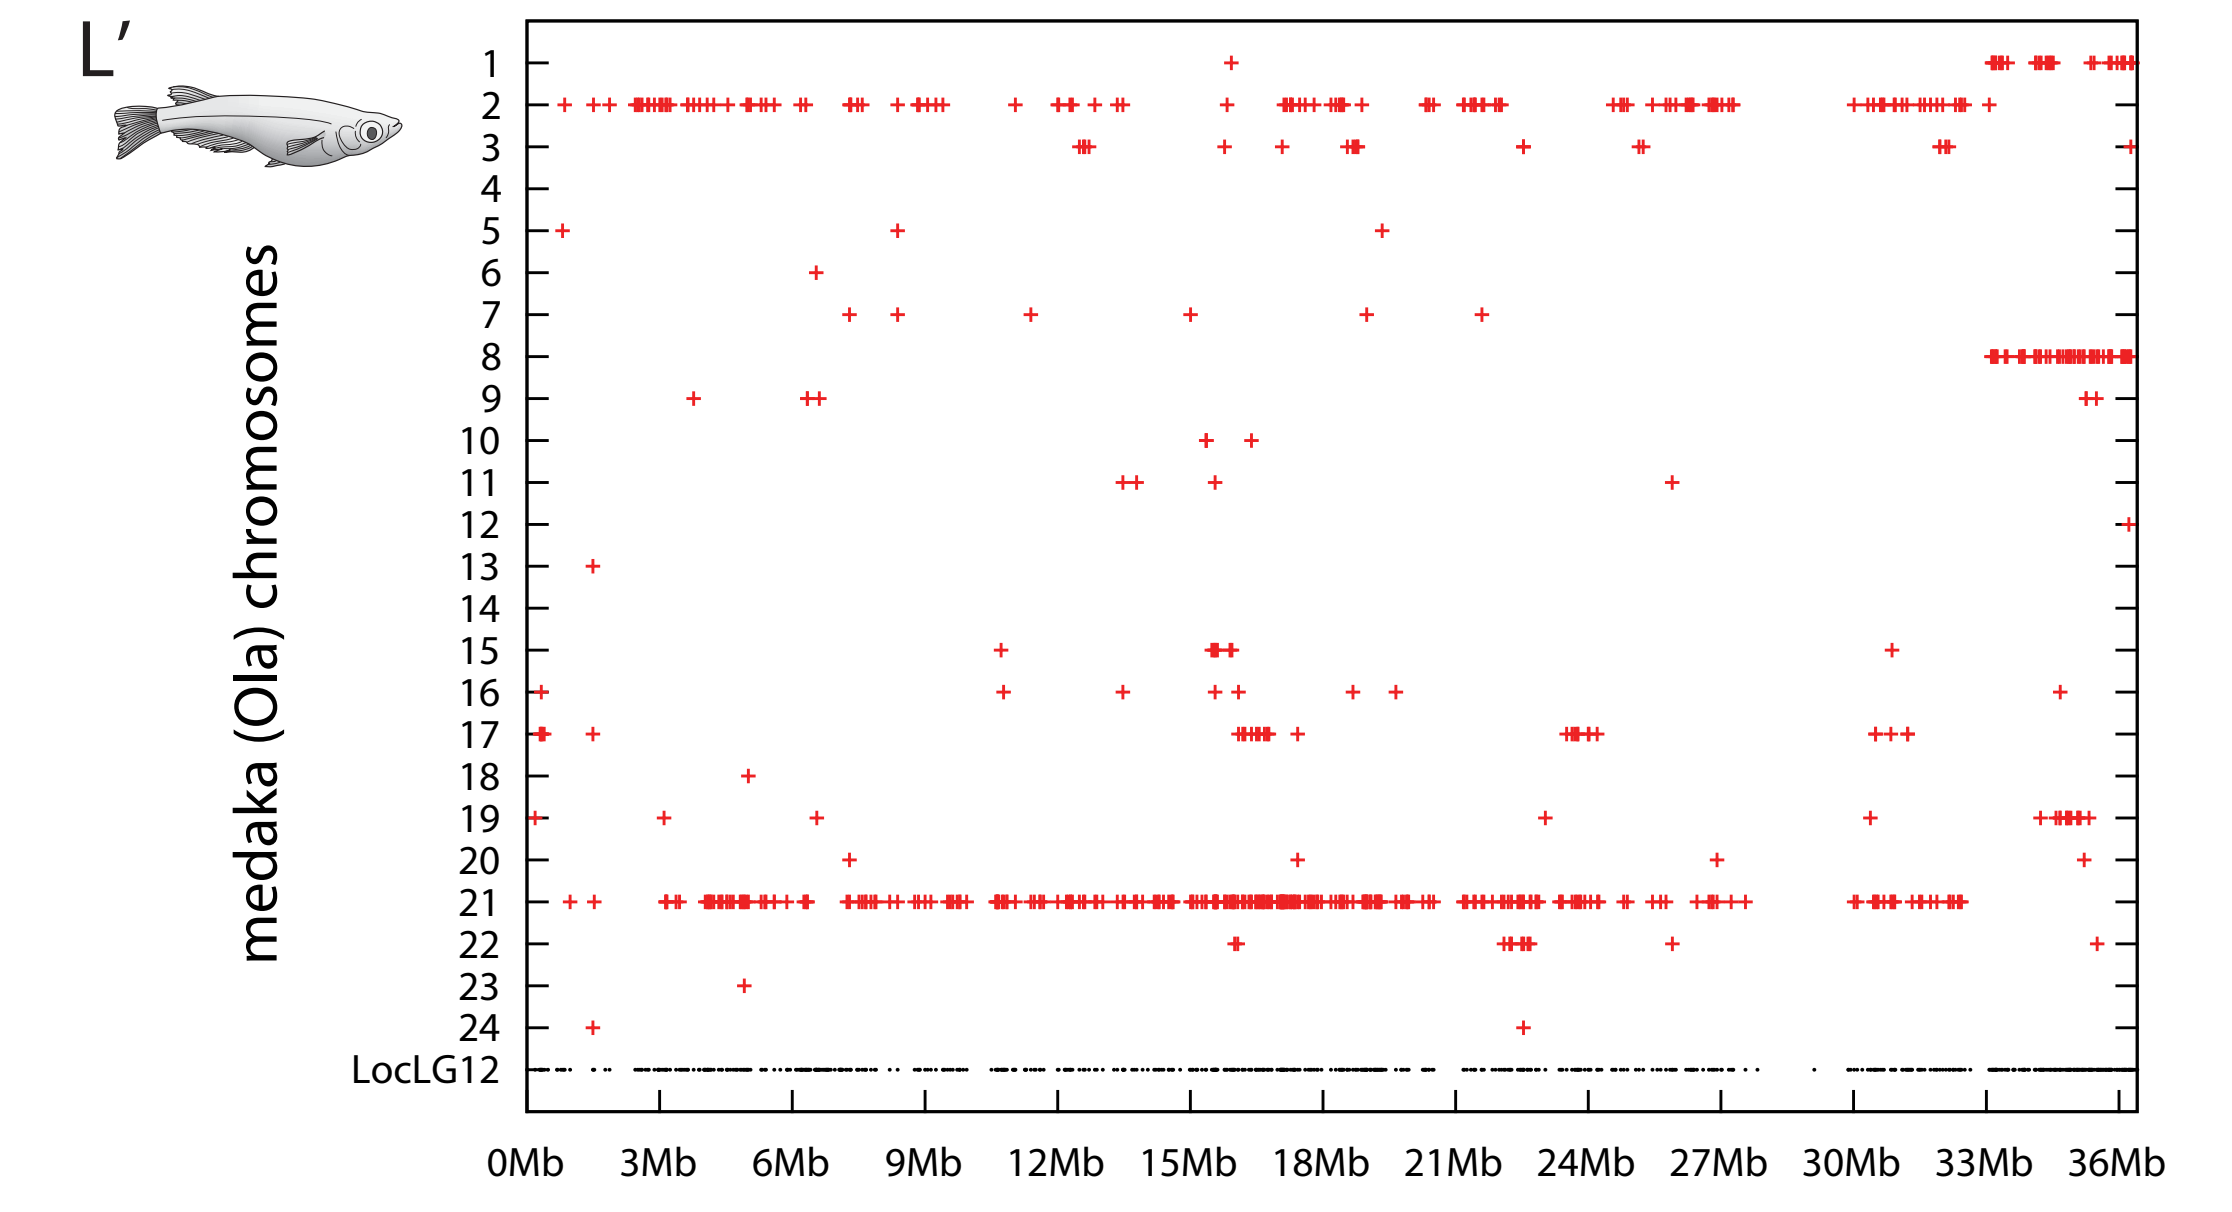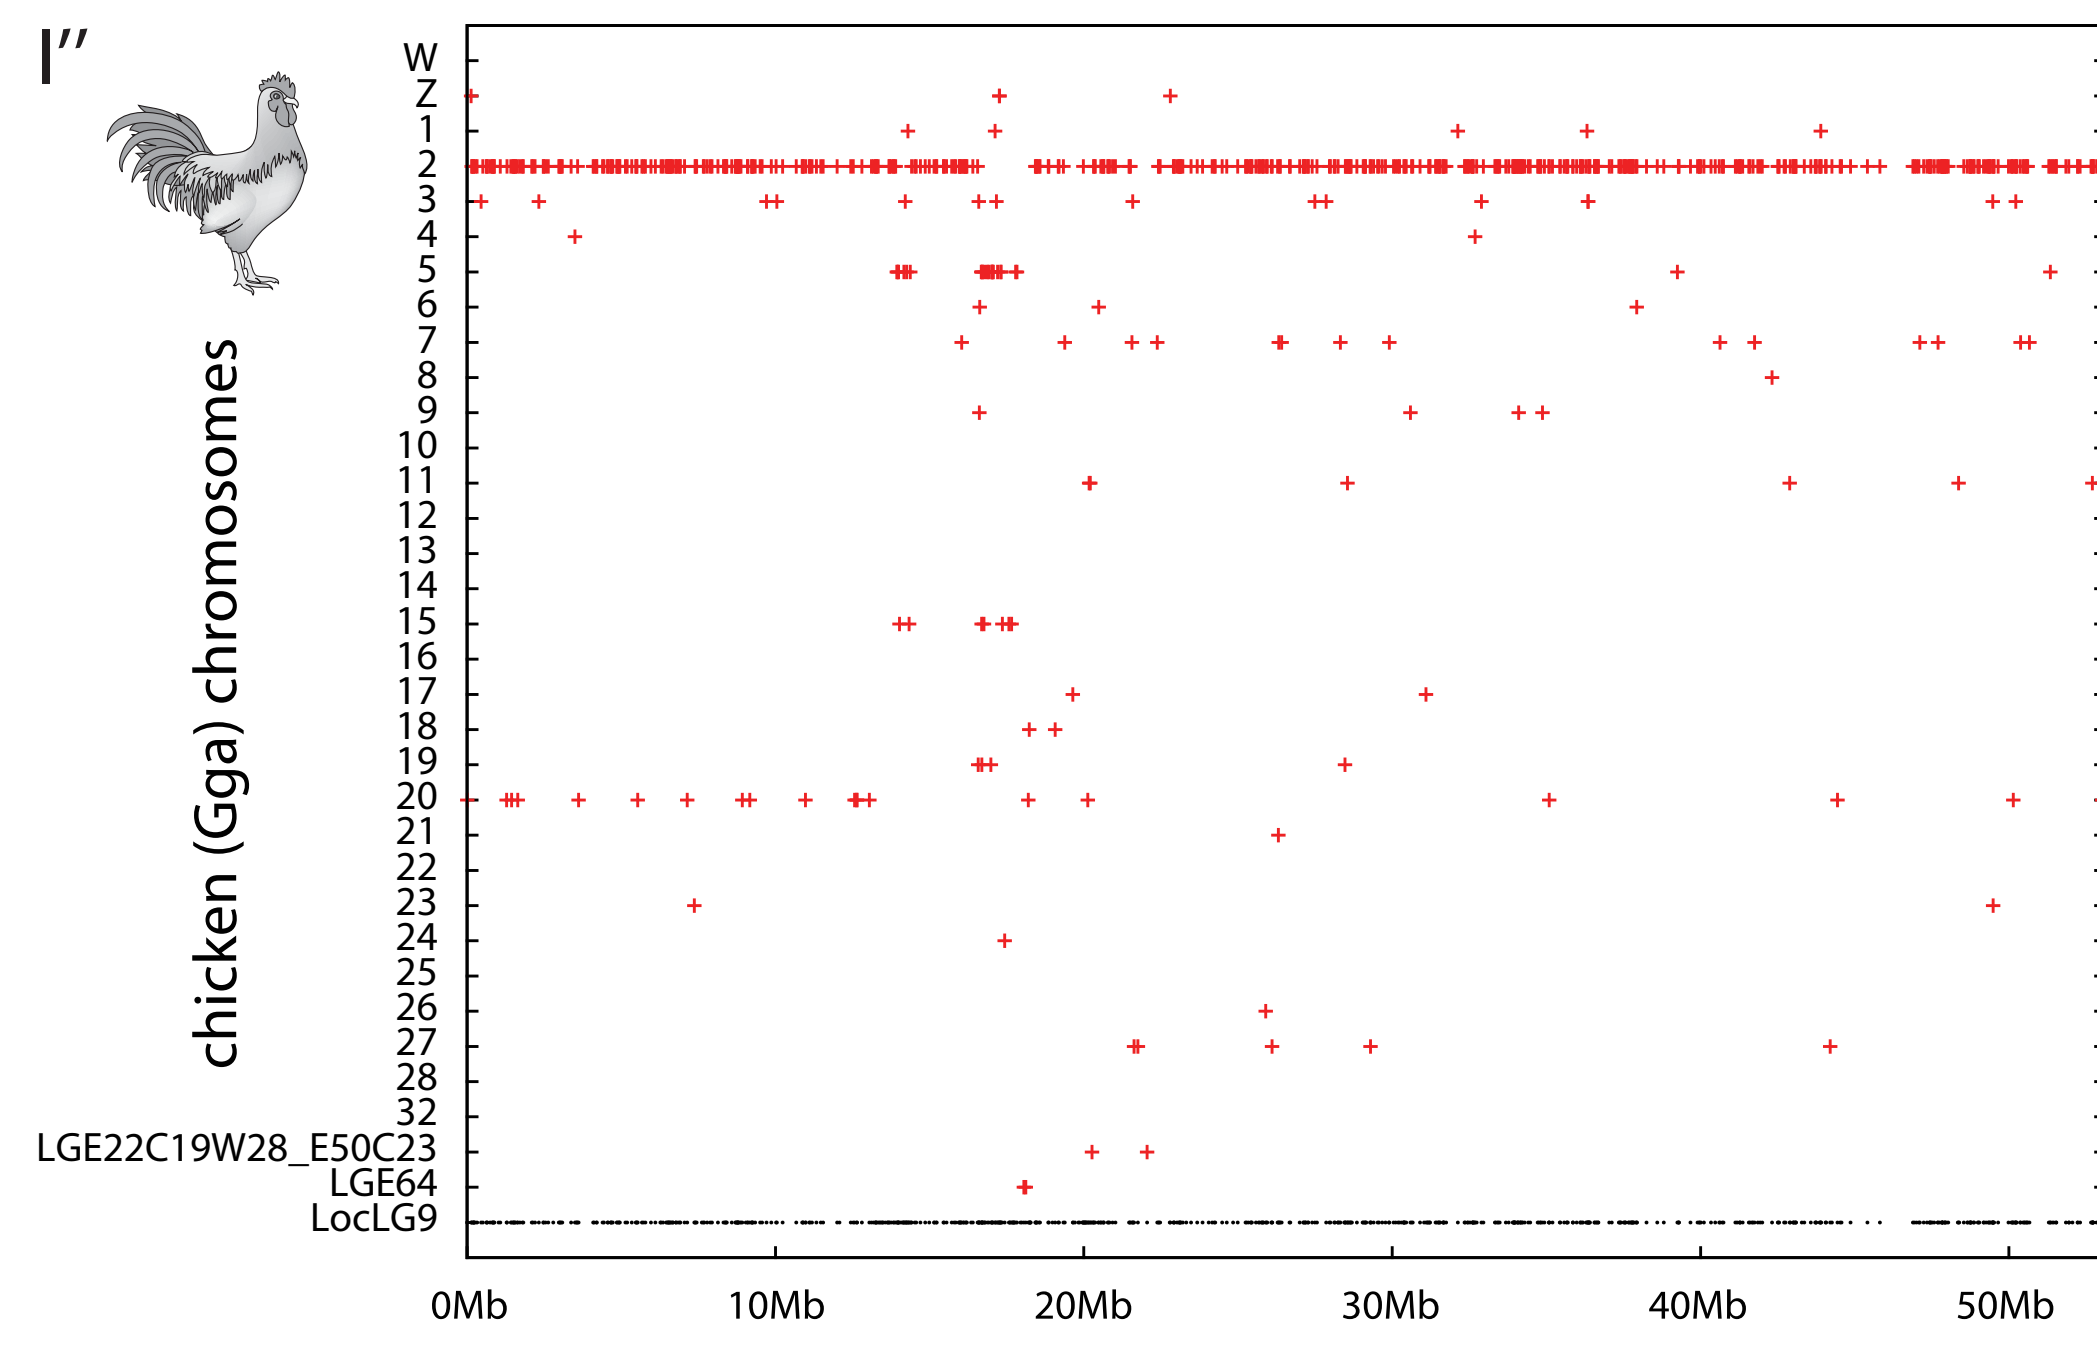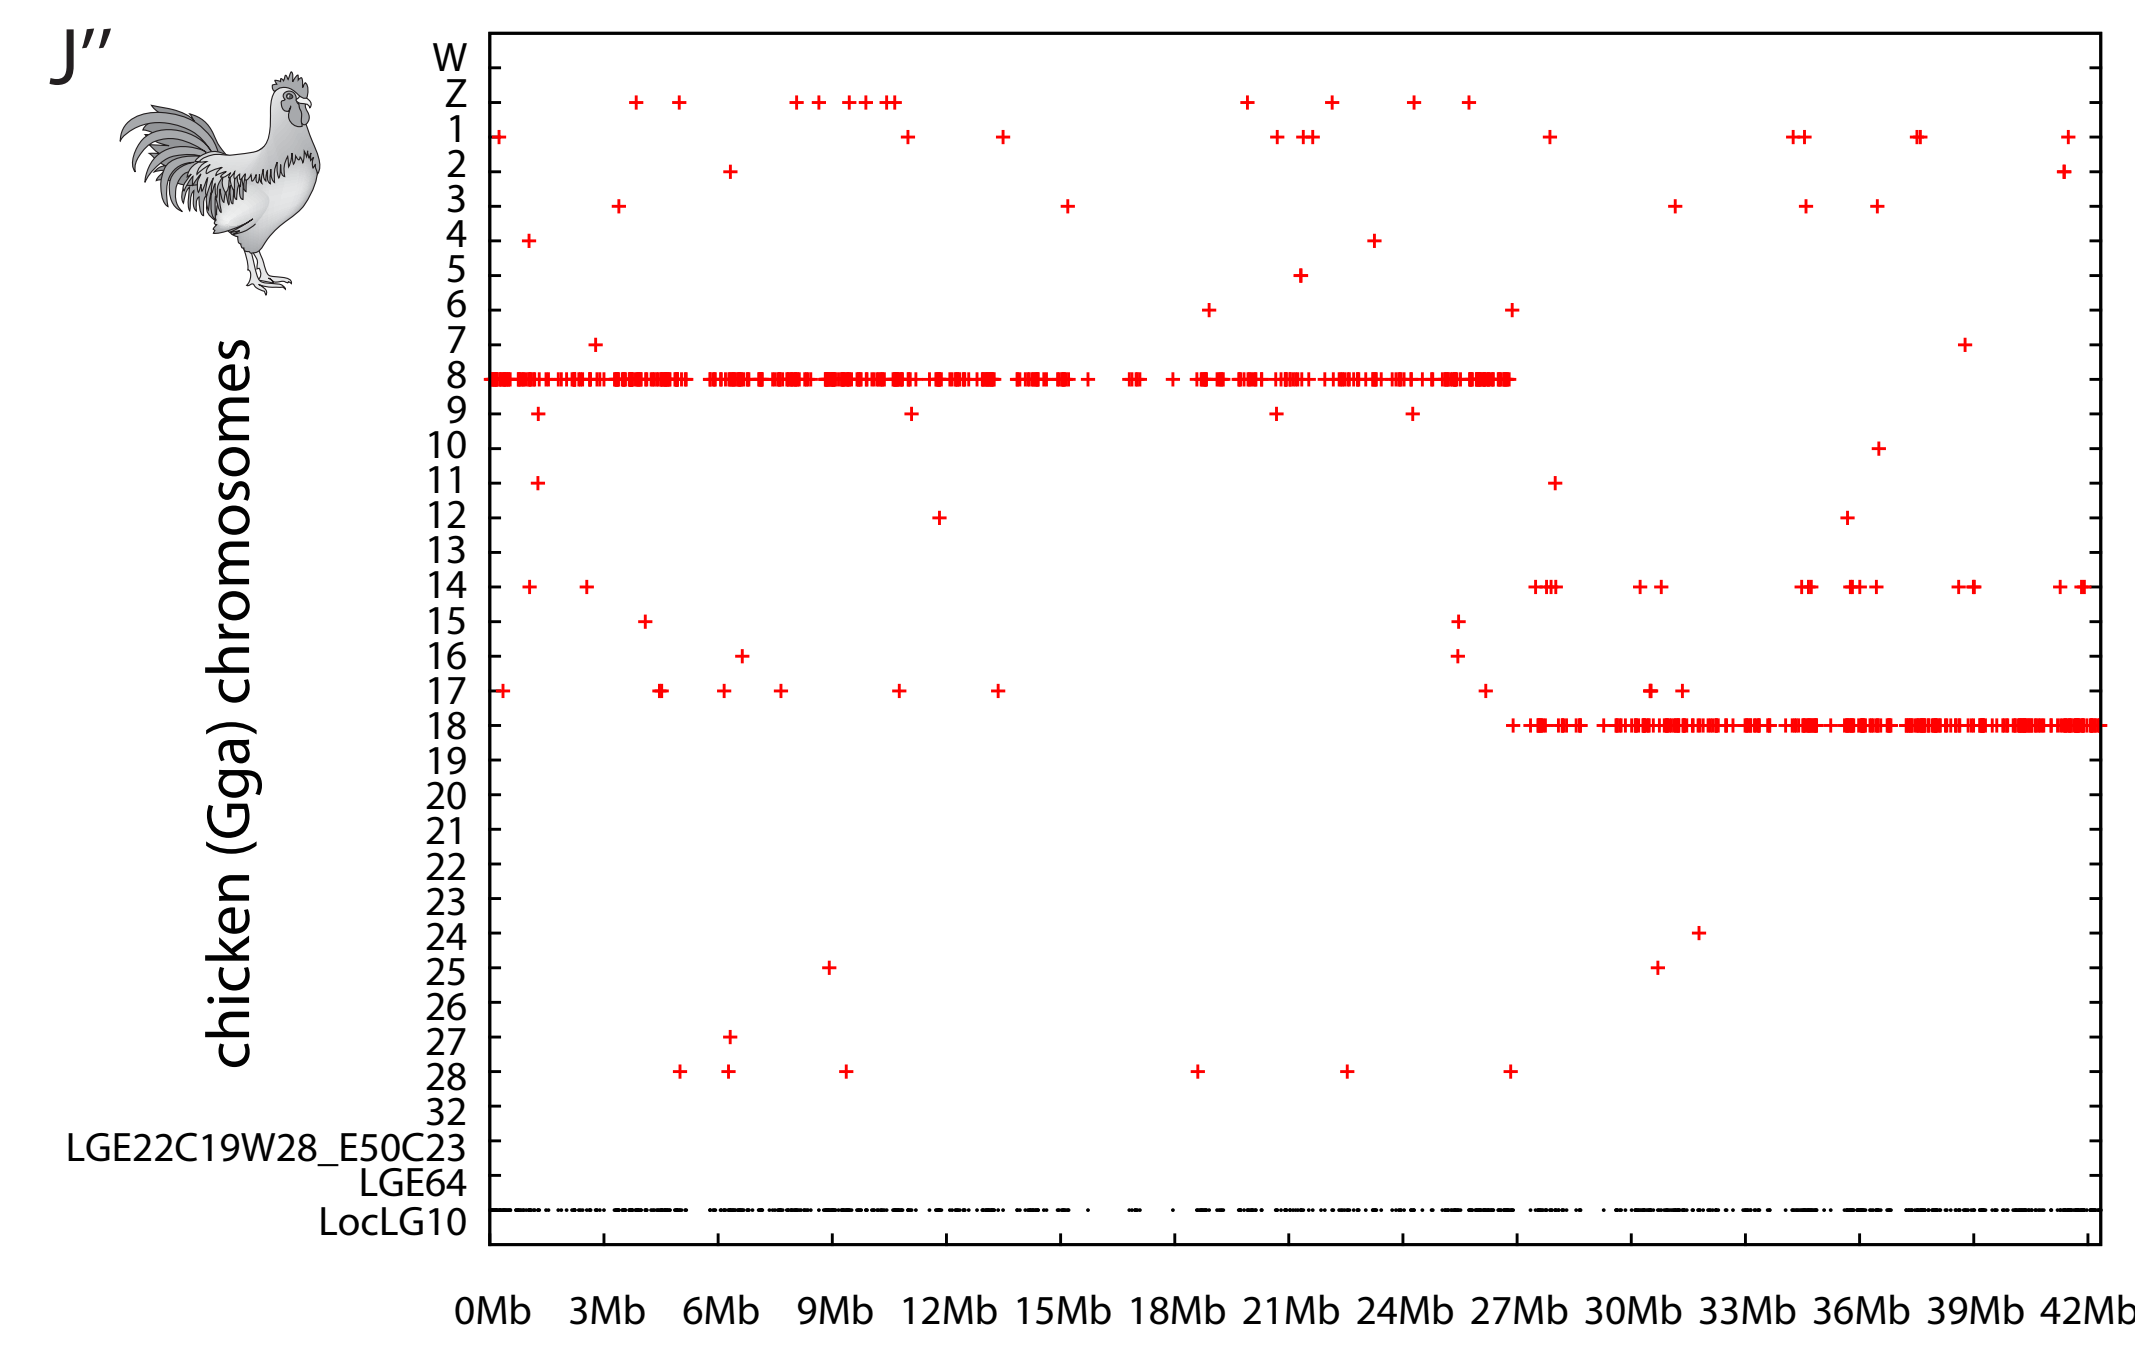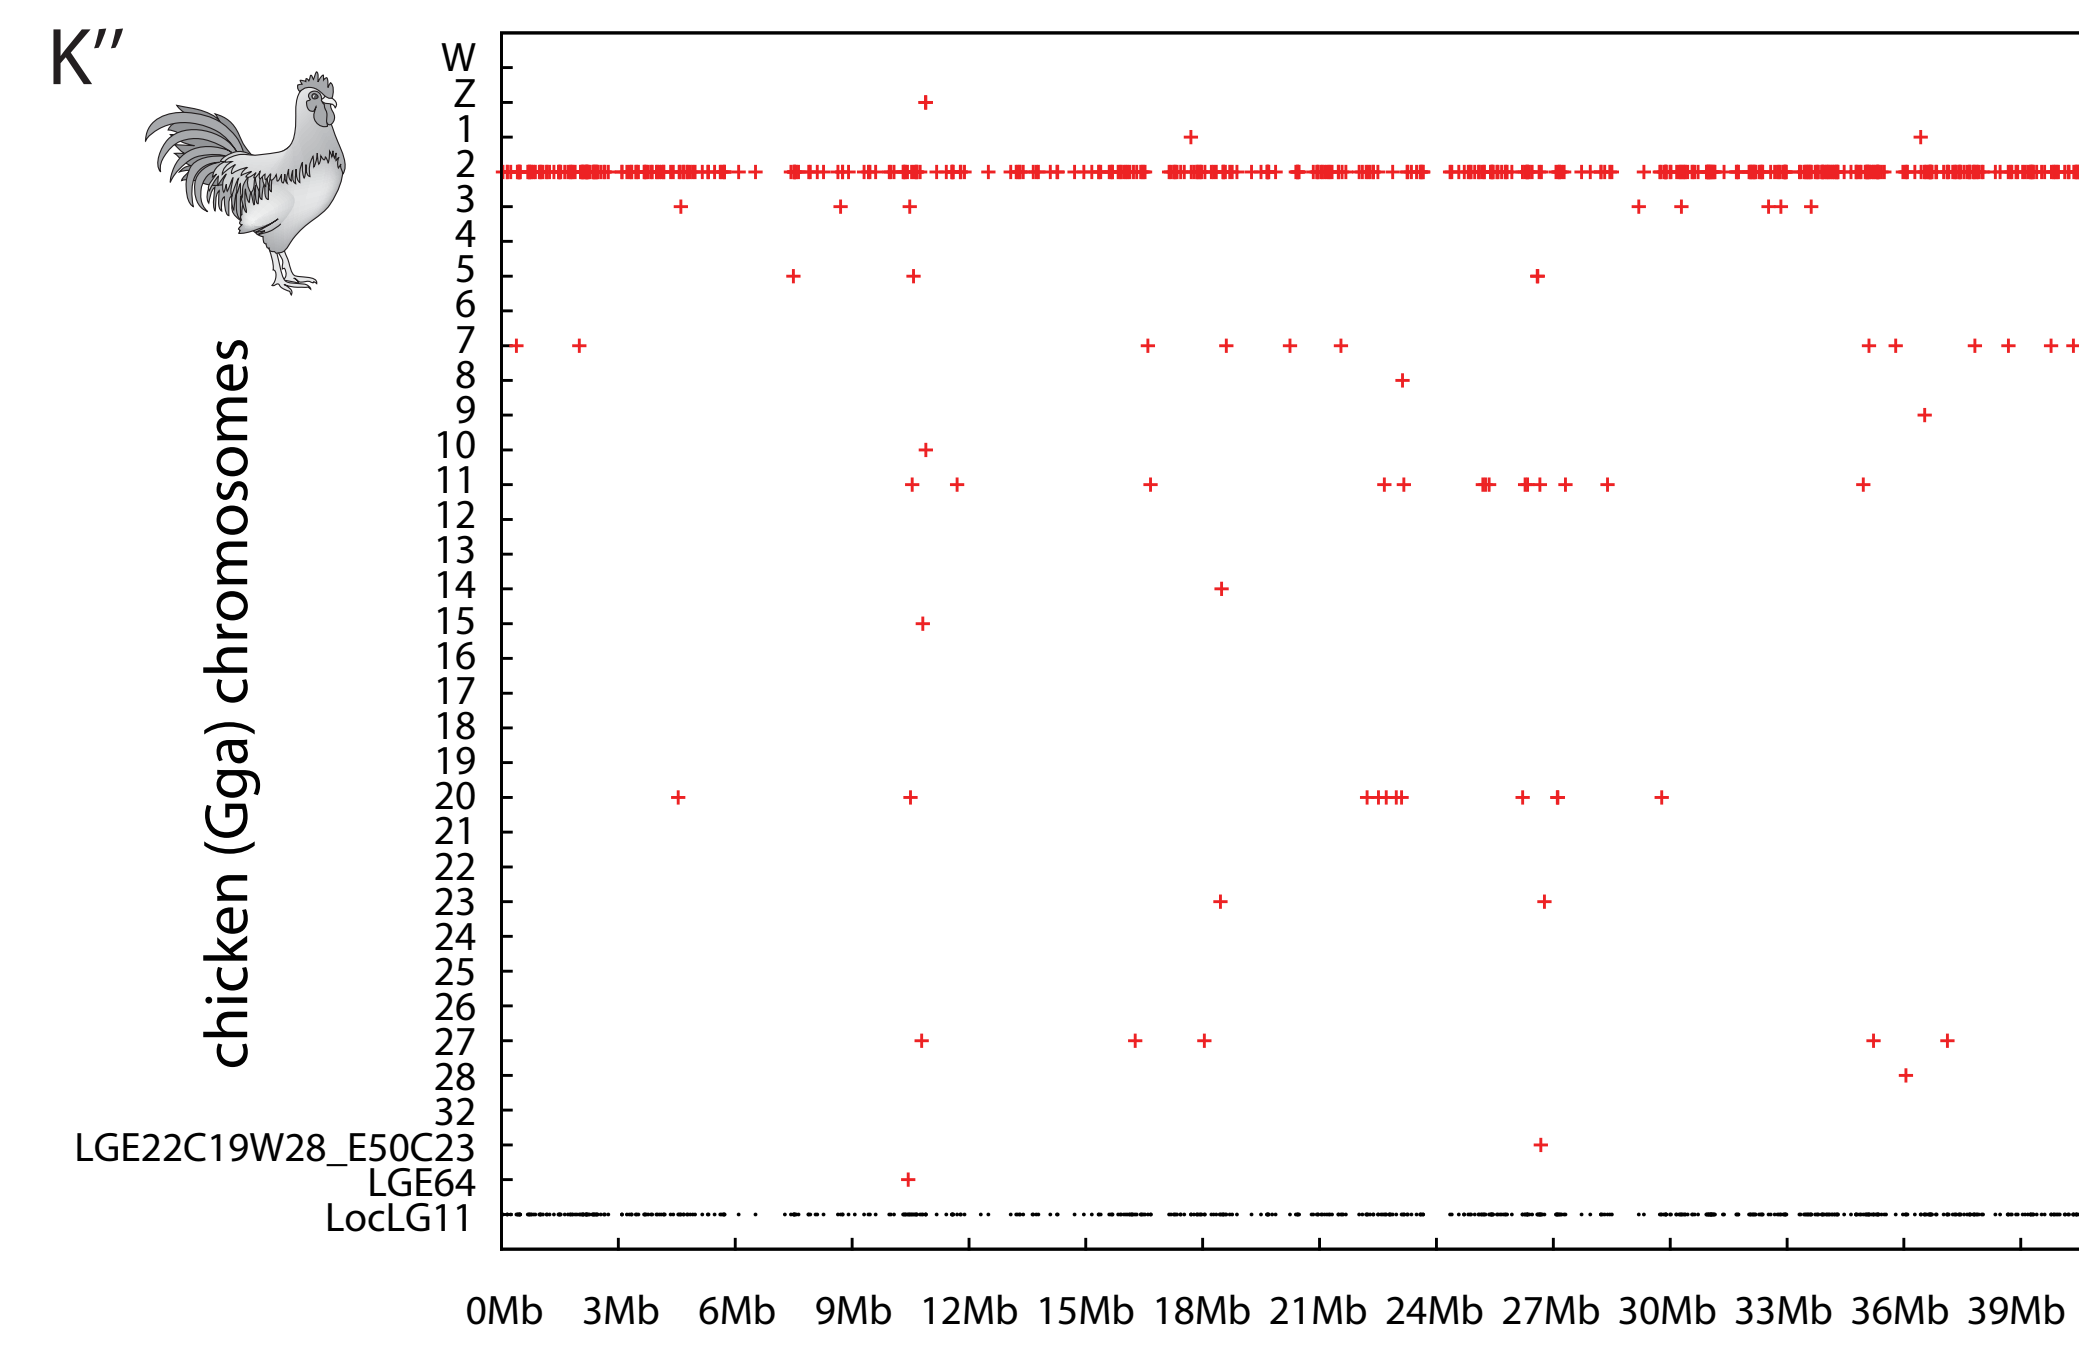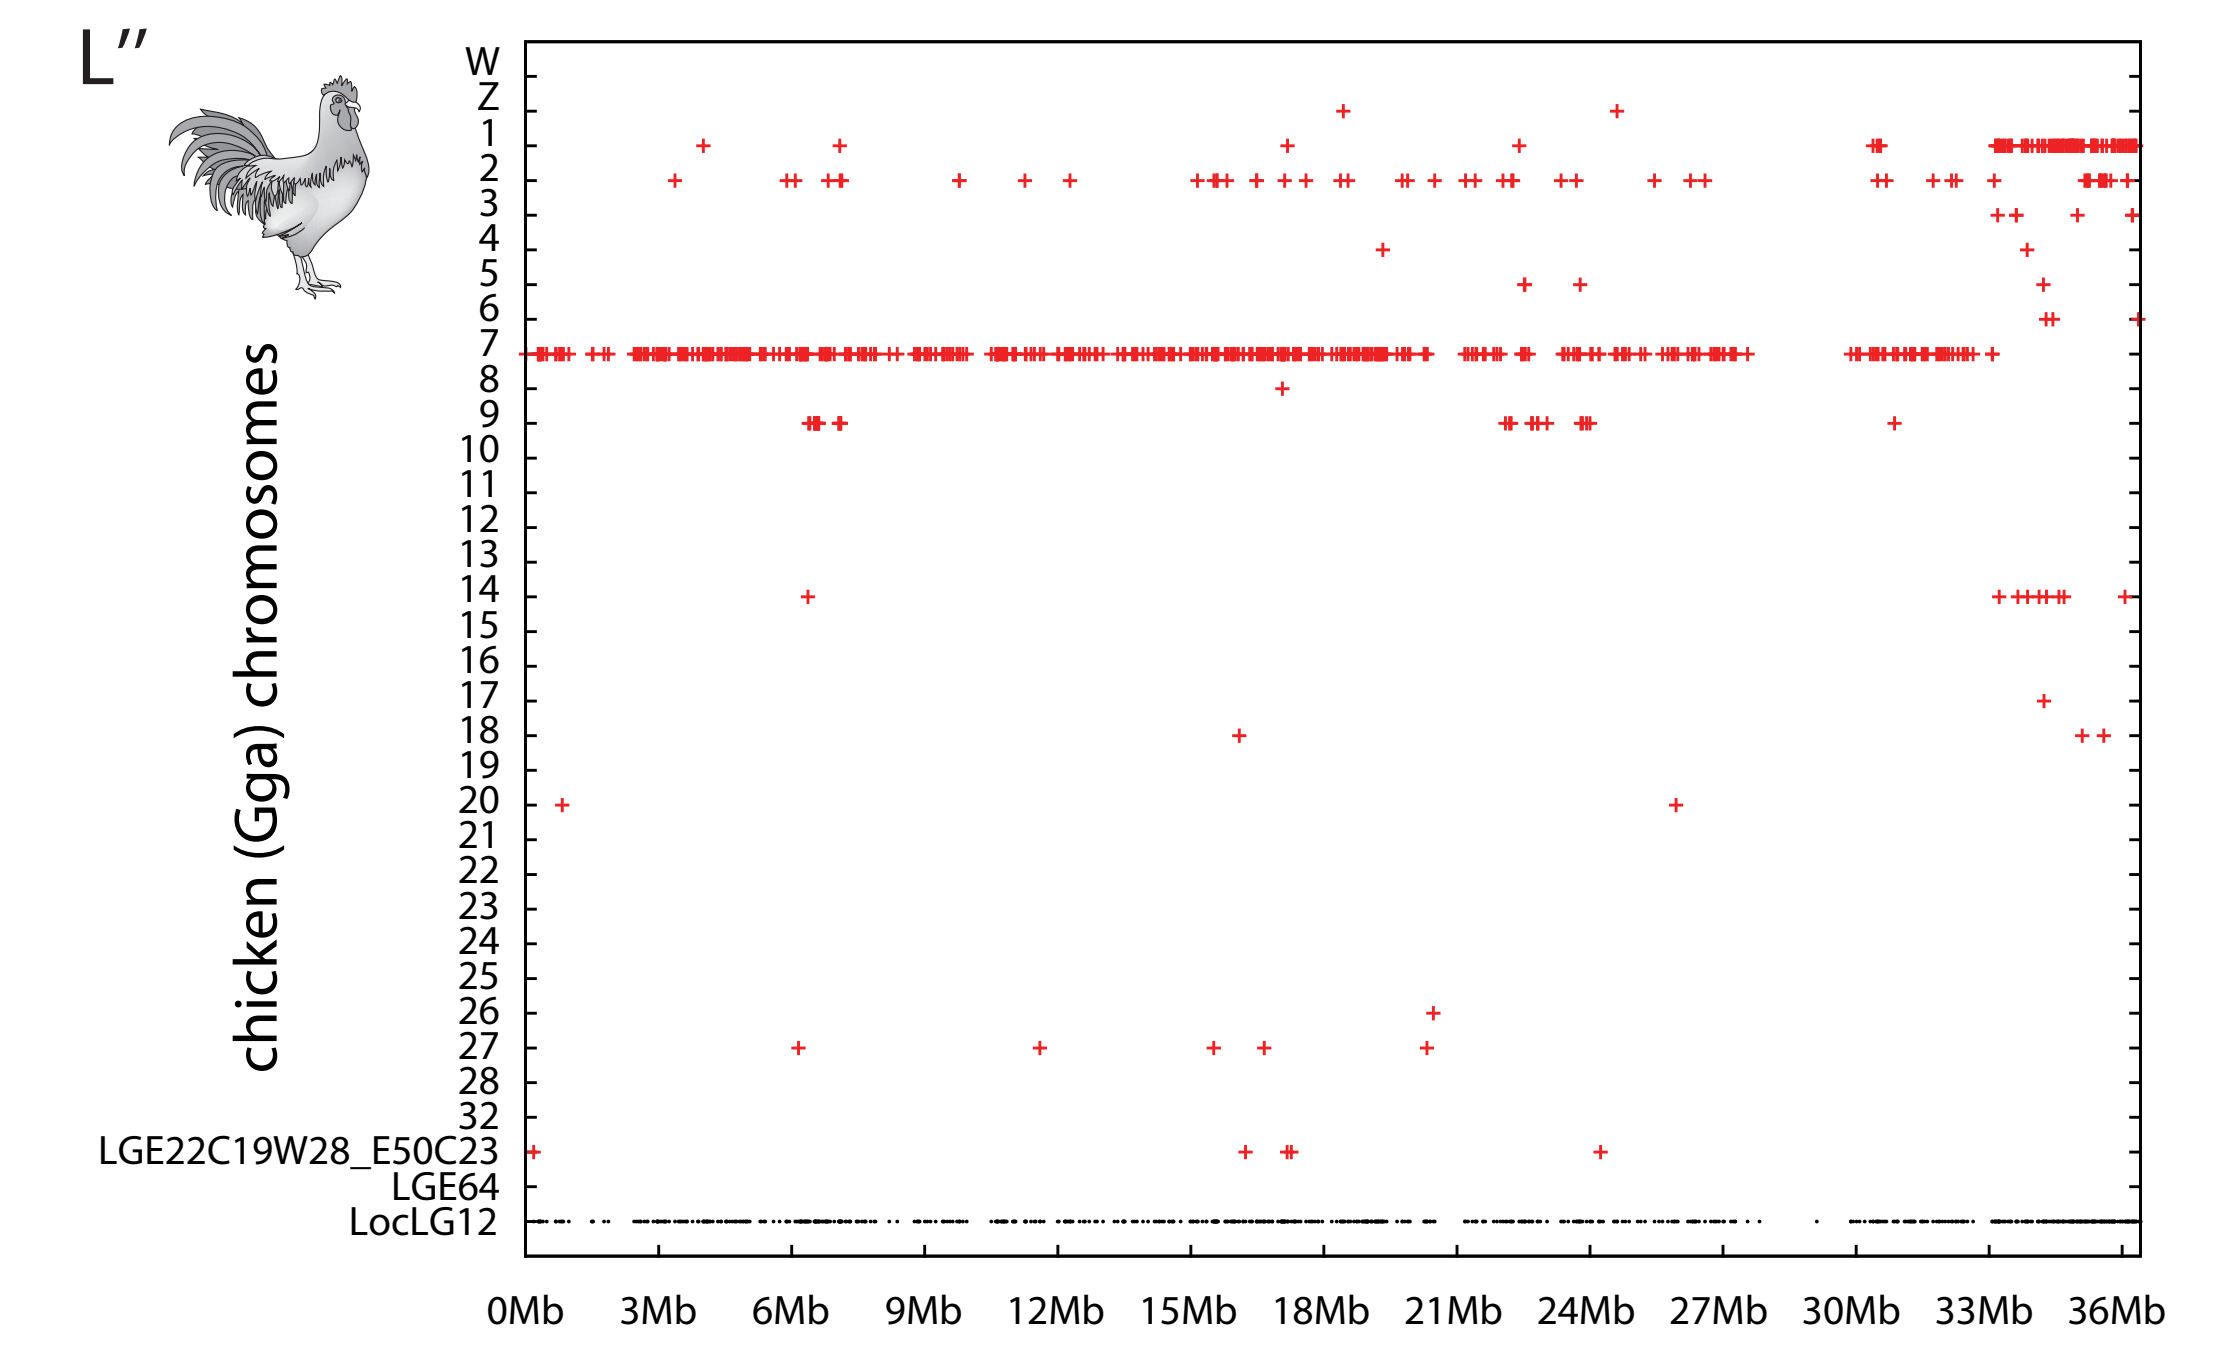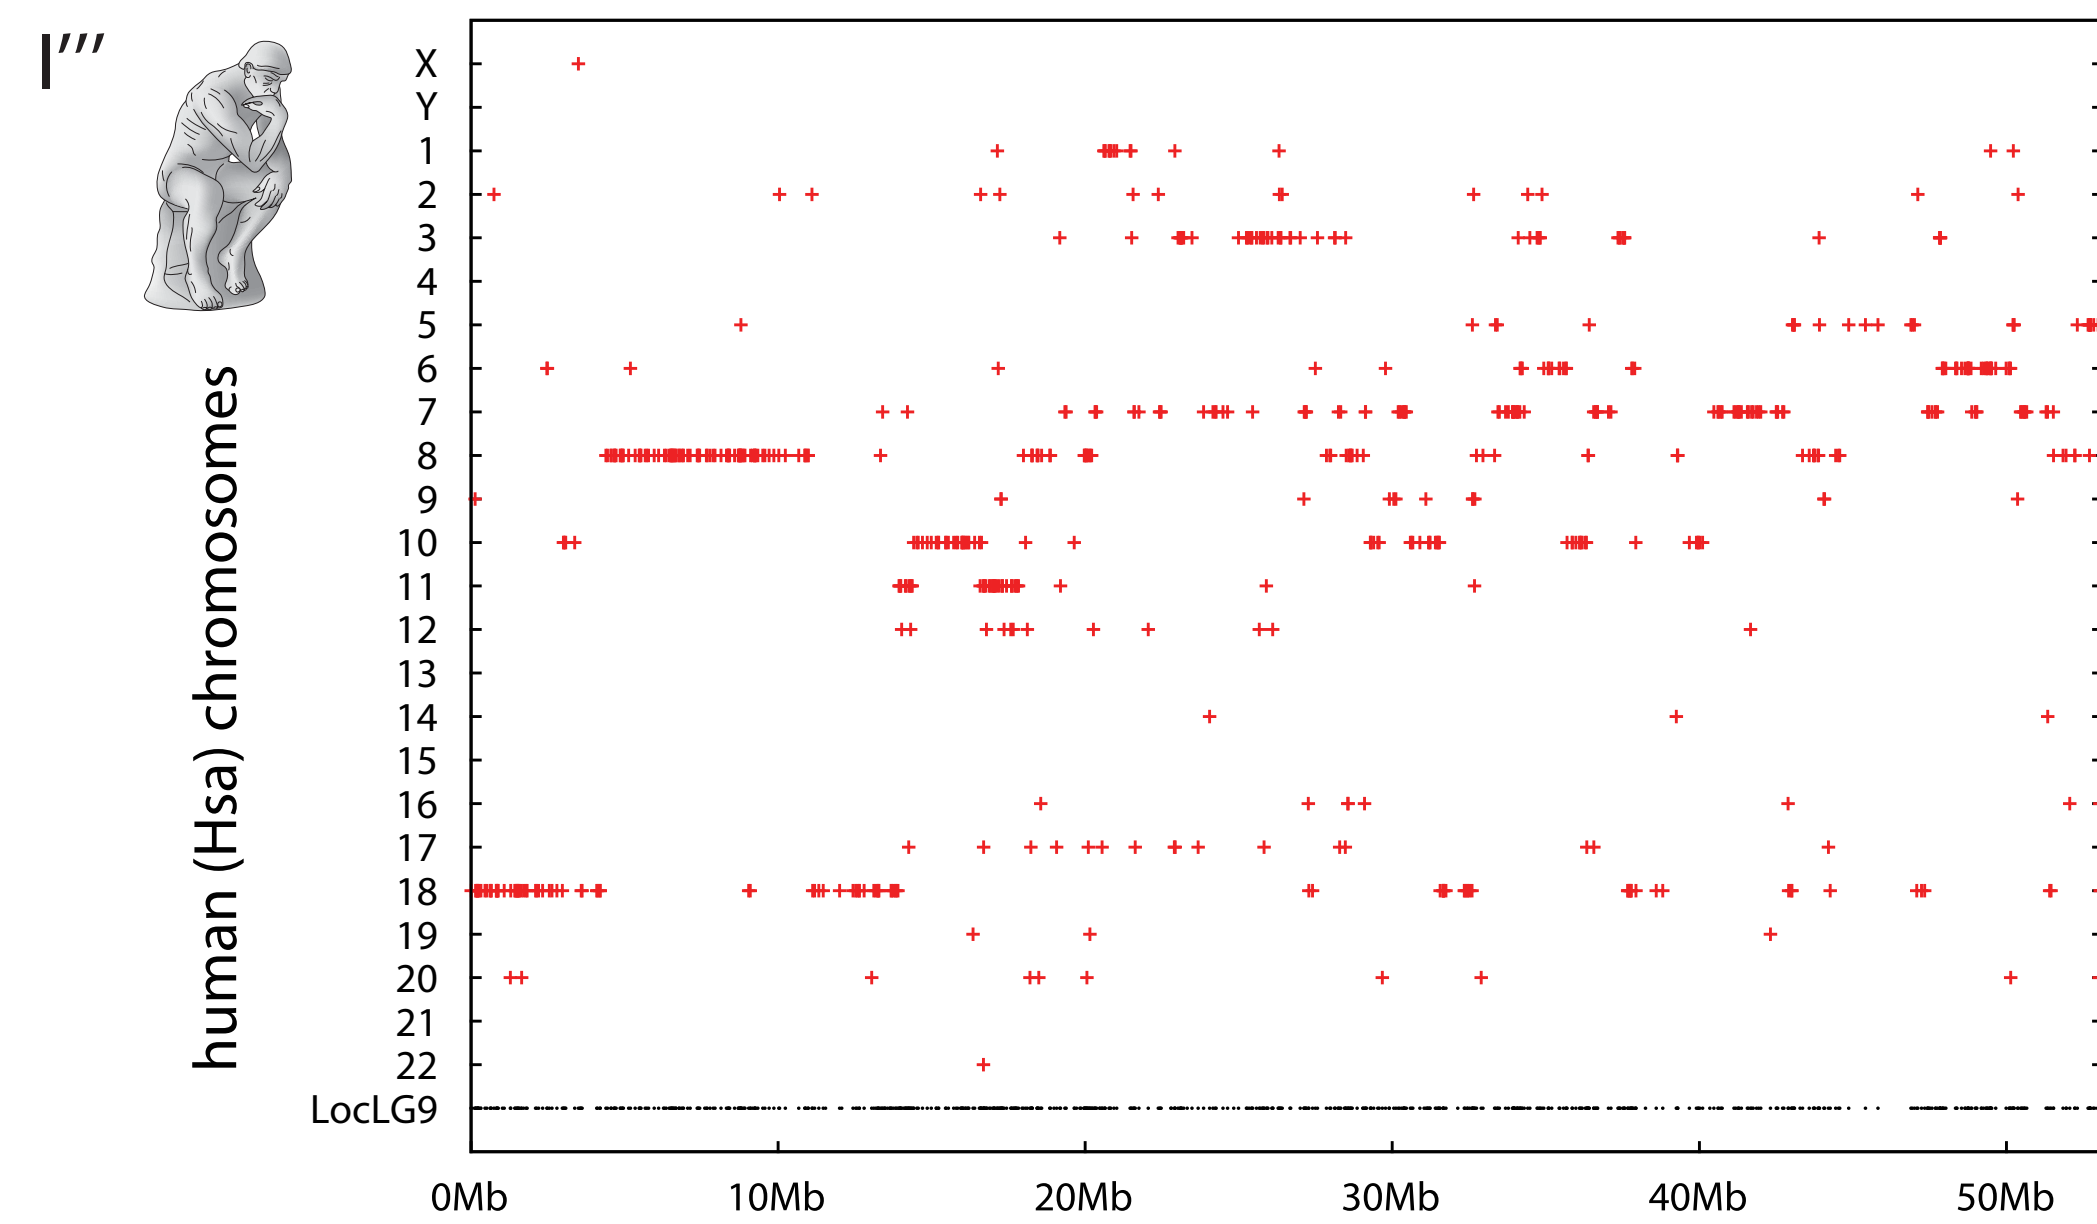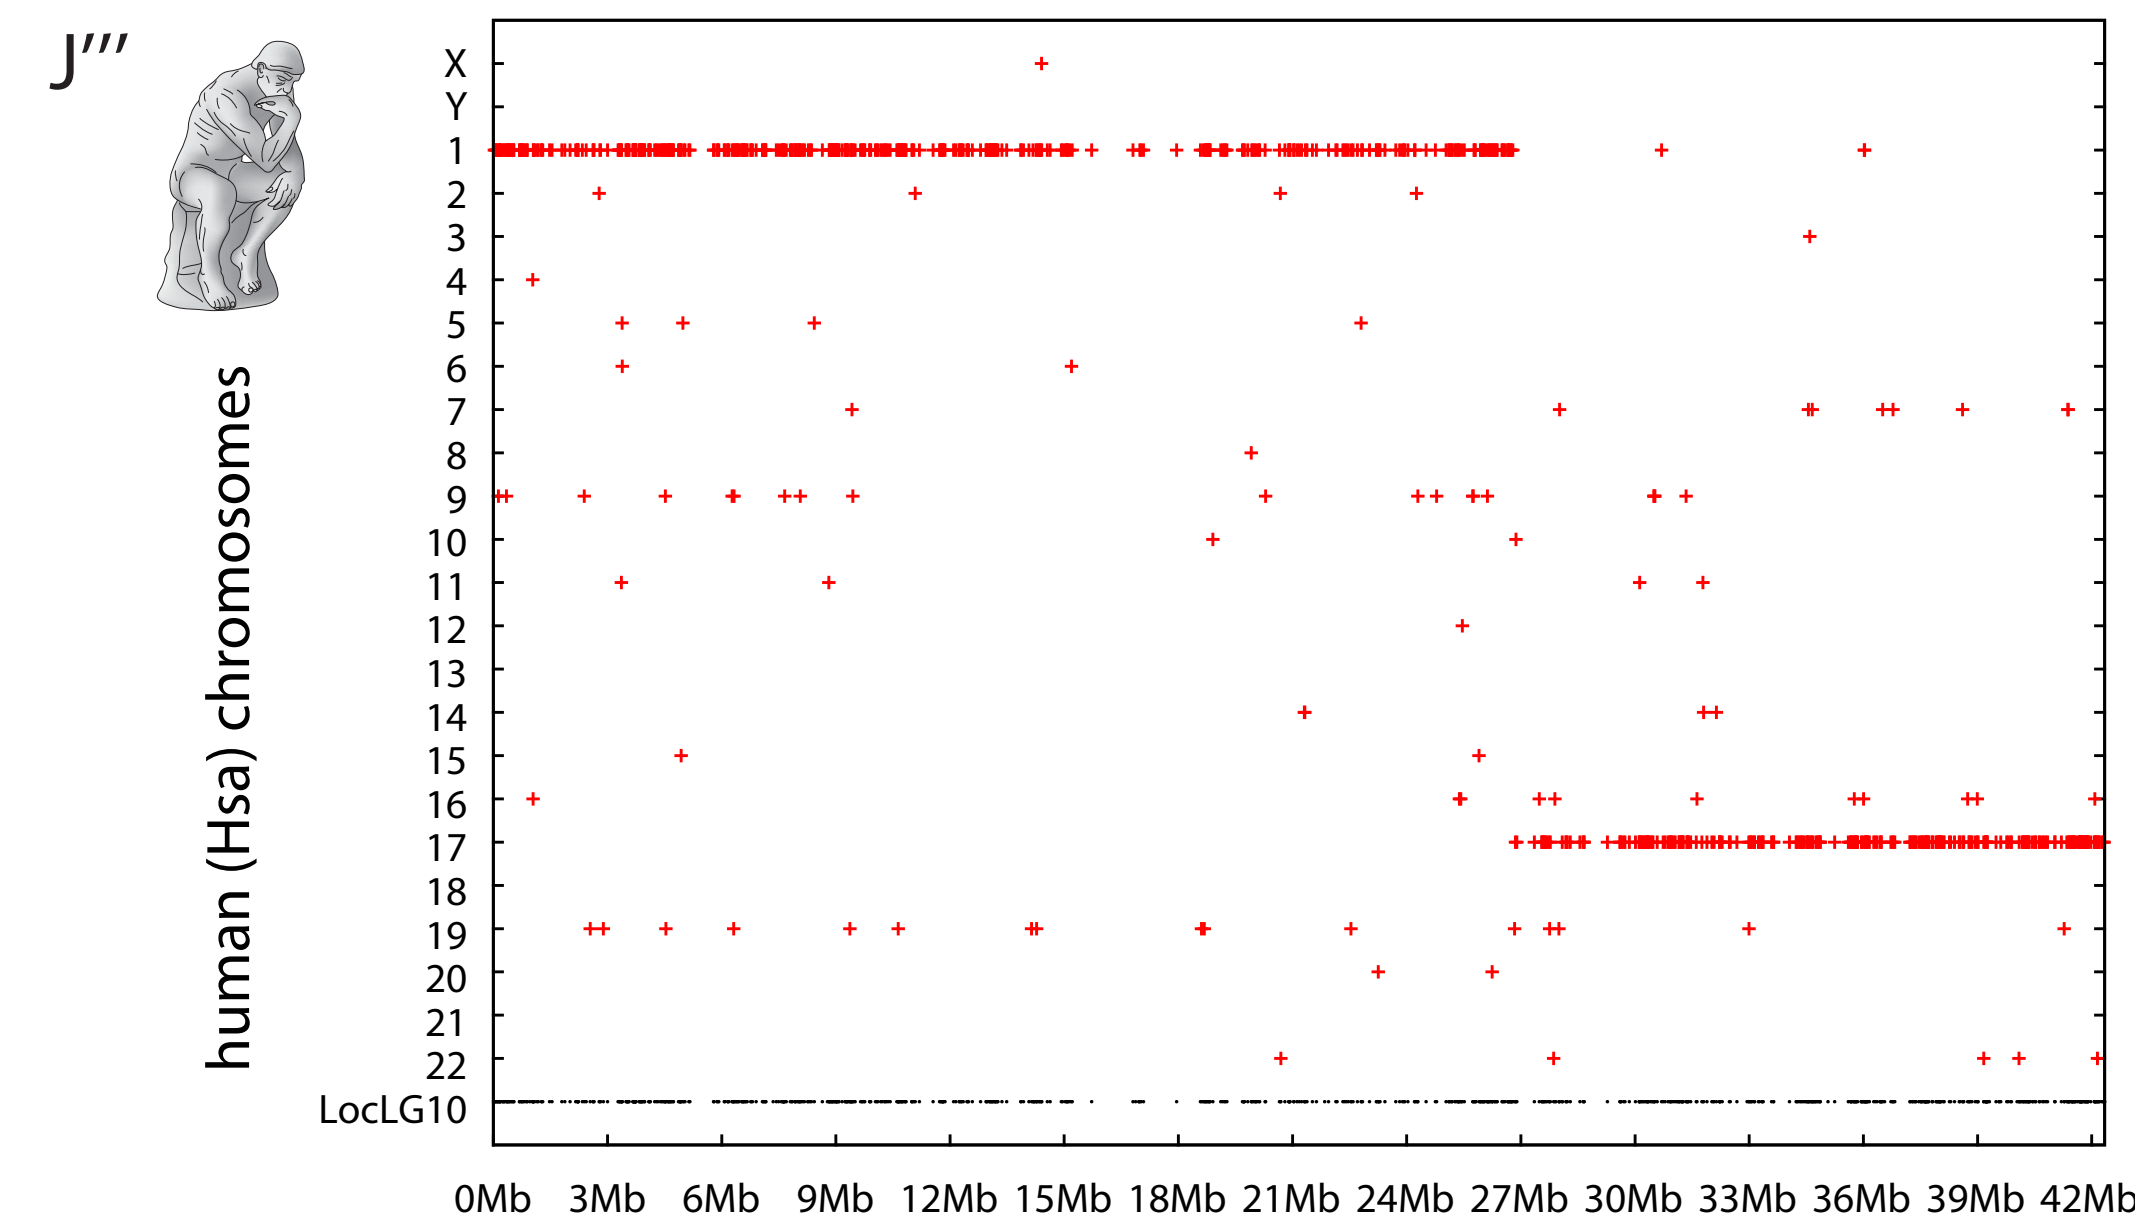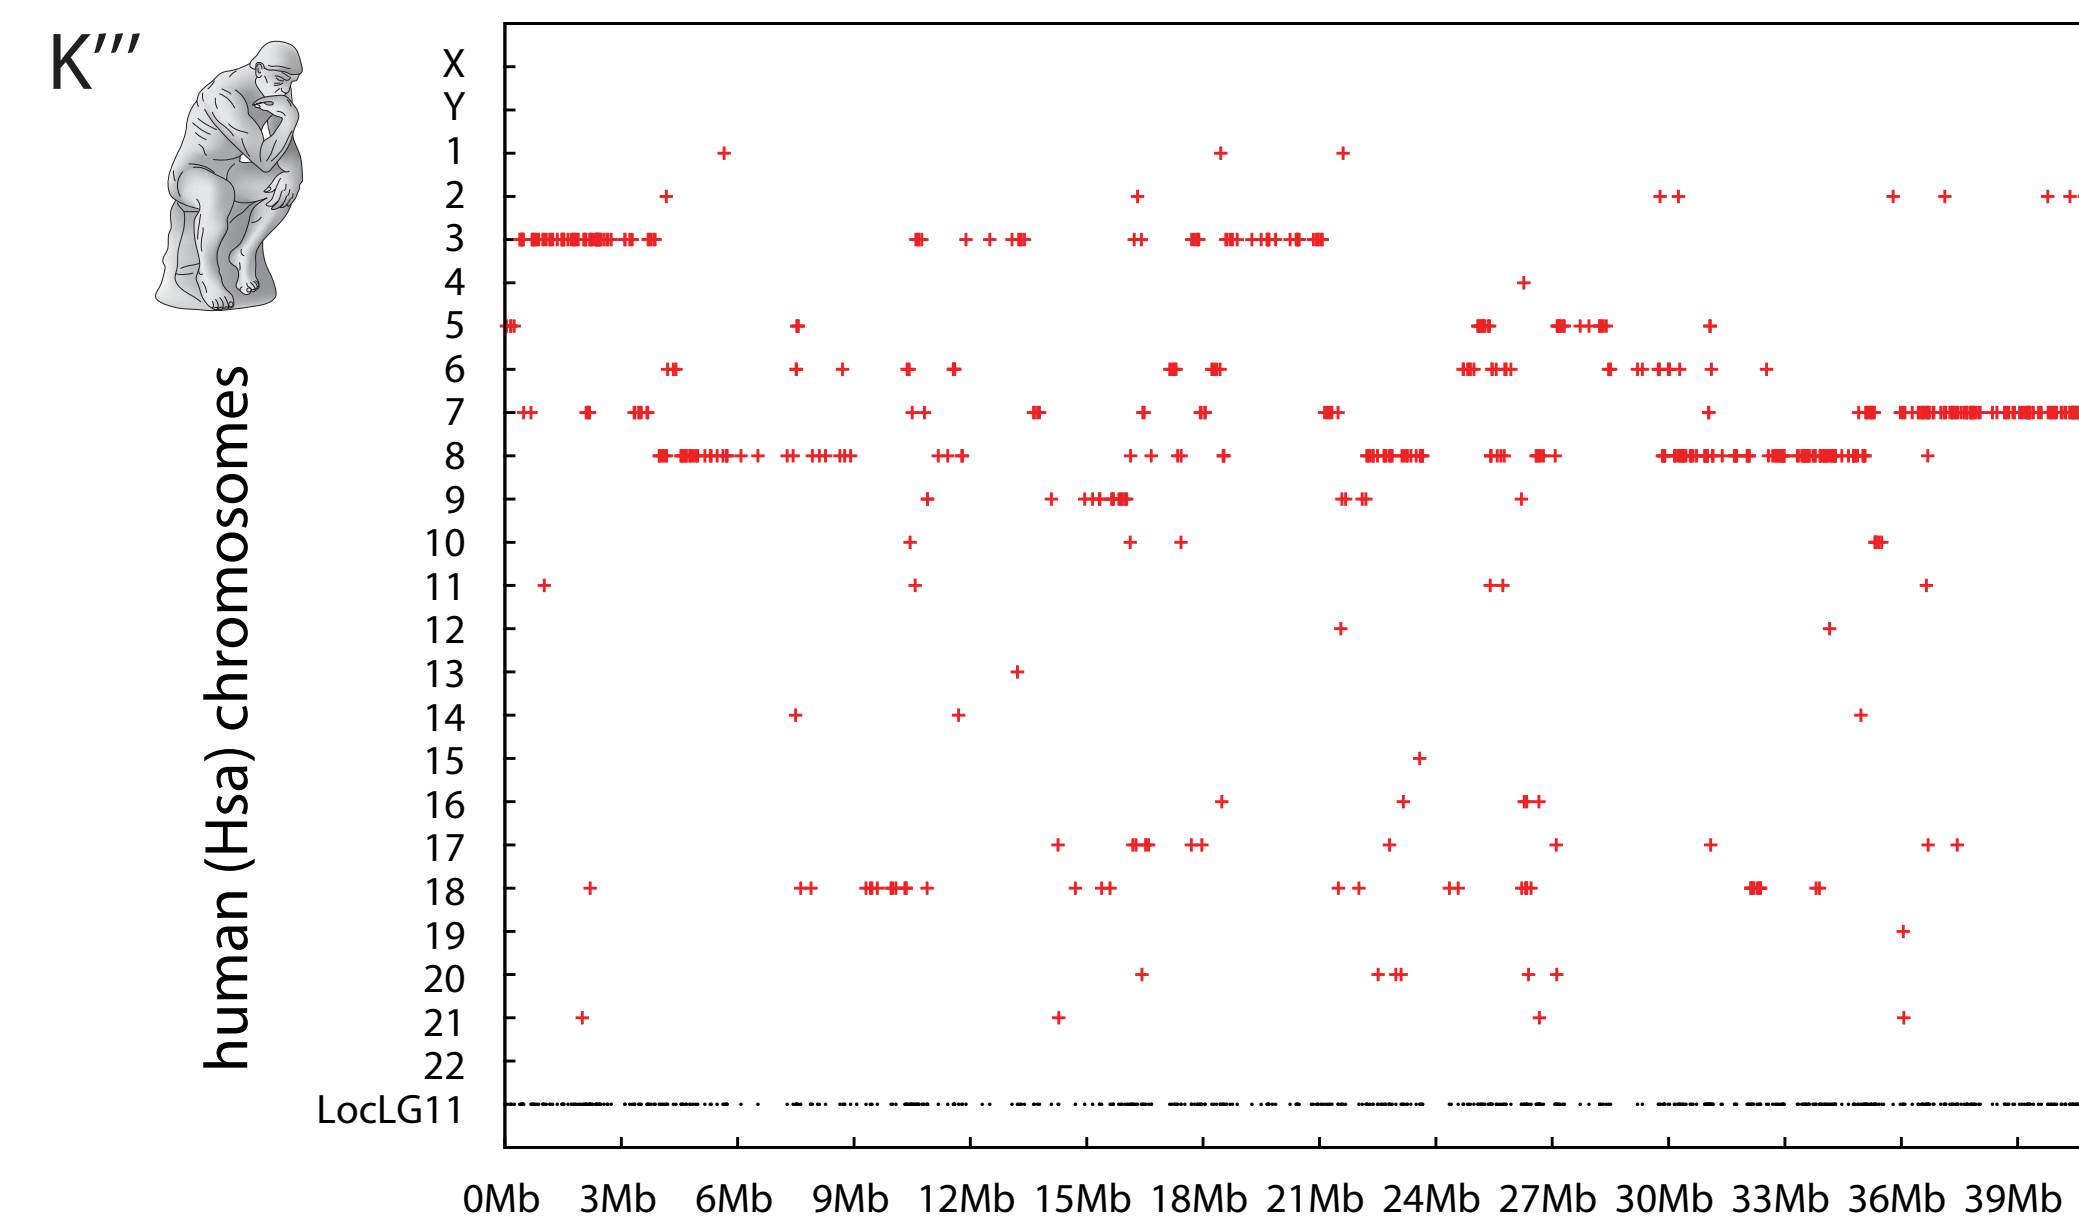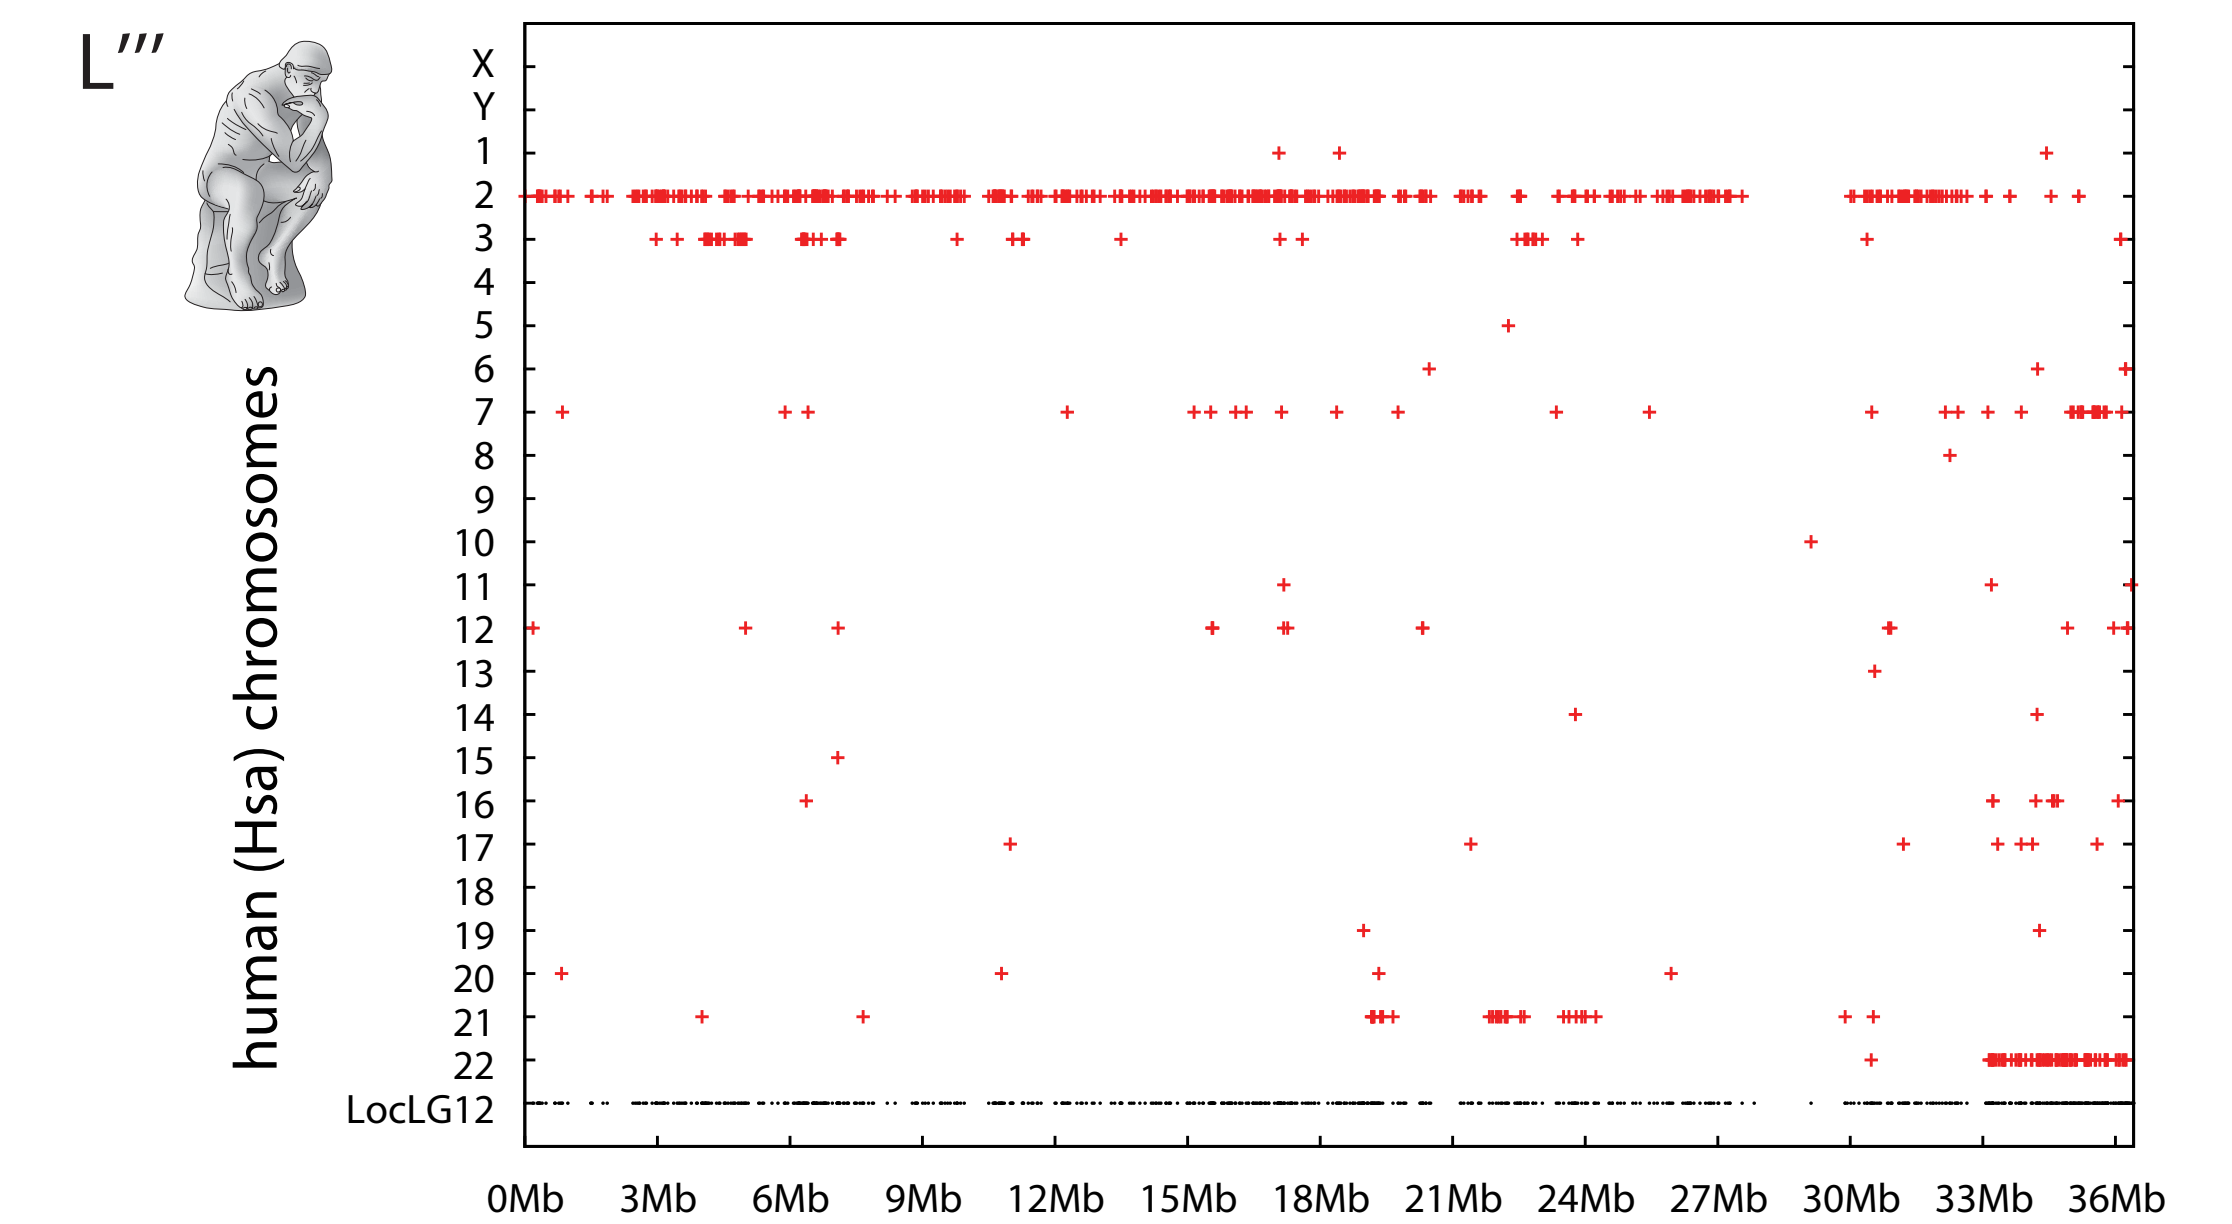

 spotted gar (Loc) LG9 Orthologs

 spotted gar (Loc) LG10 Orthologs

 spotted gar (Loc) LG11 Orthologs

 spotted gar (Loc) LG12 Orthologs



M Spotted Gar Linkage Group 13

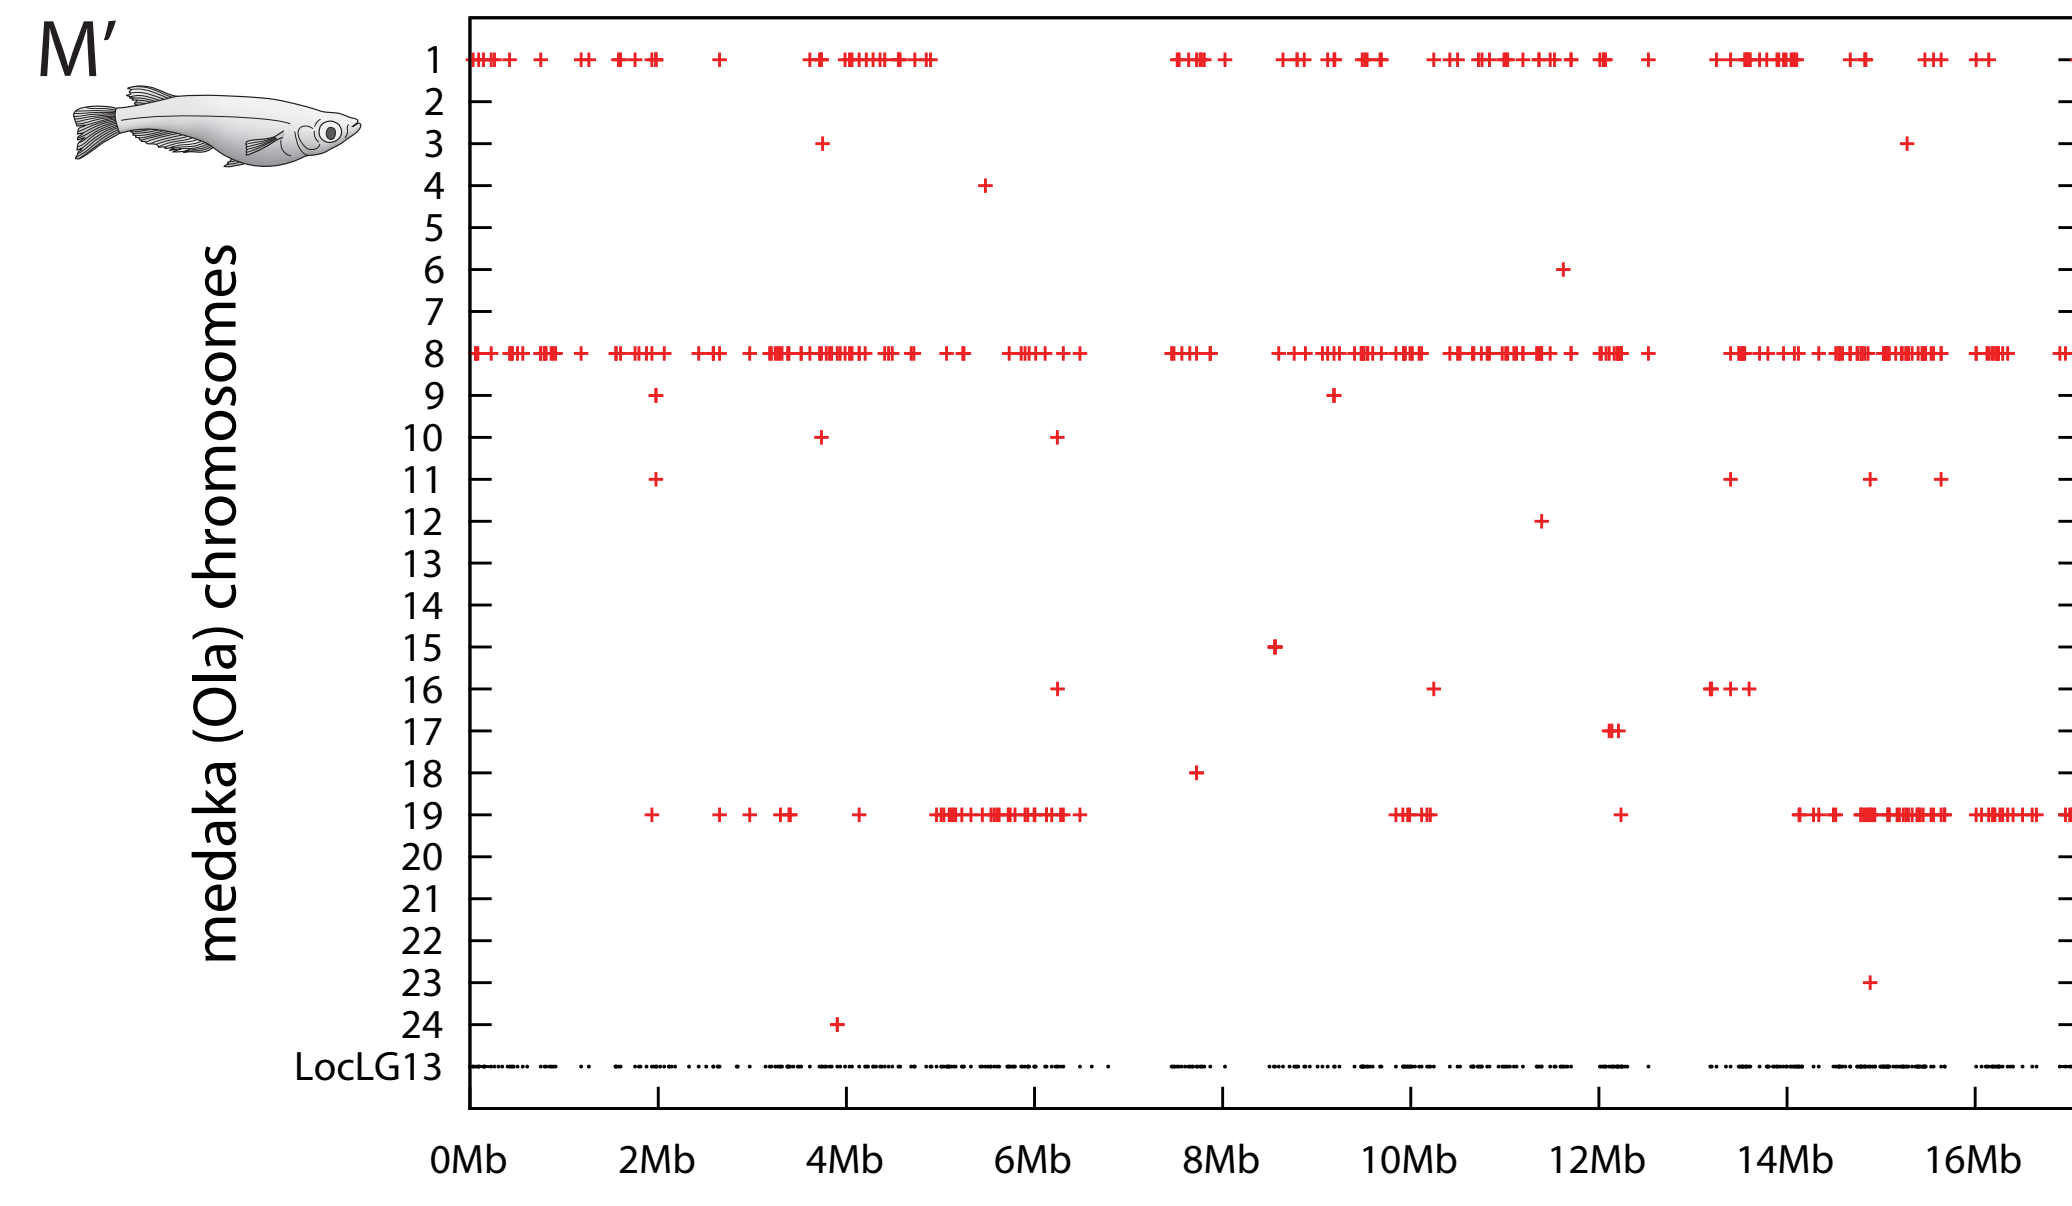

N Spotted Gar Linkage Group 14

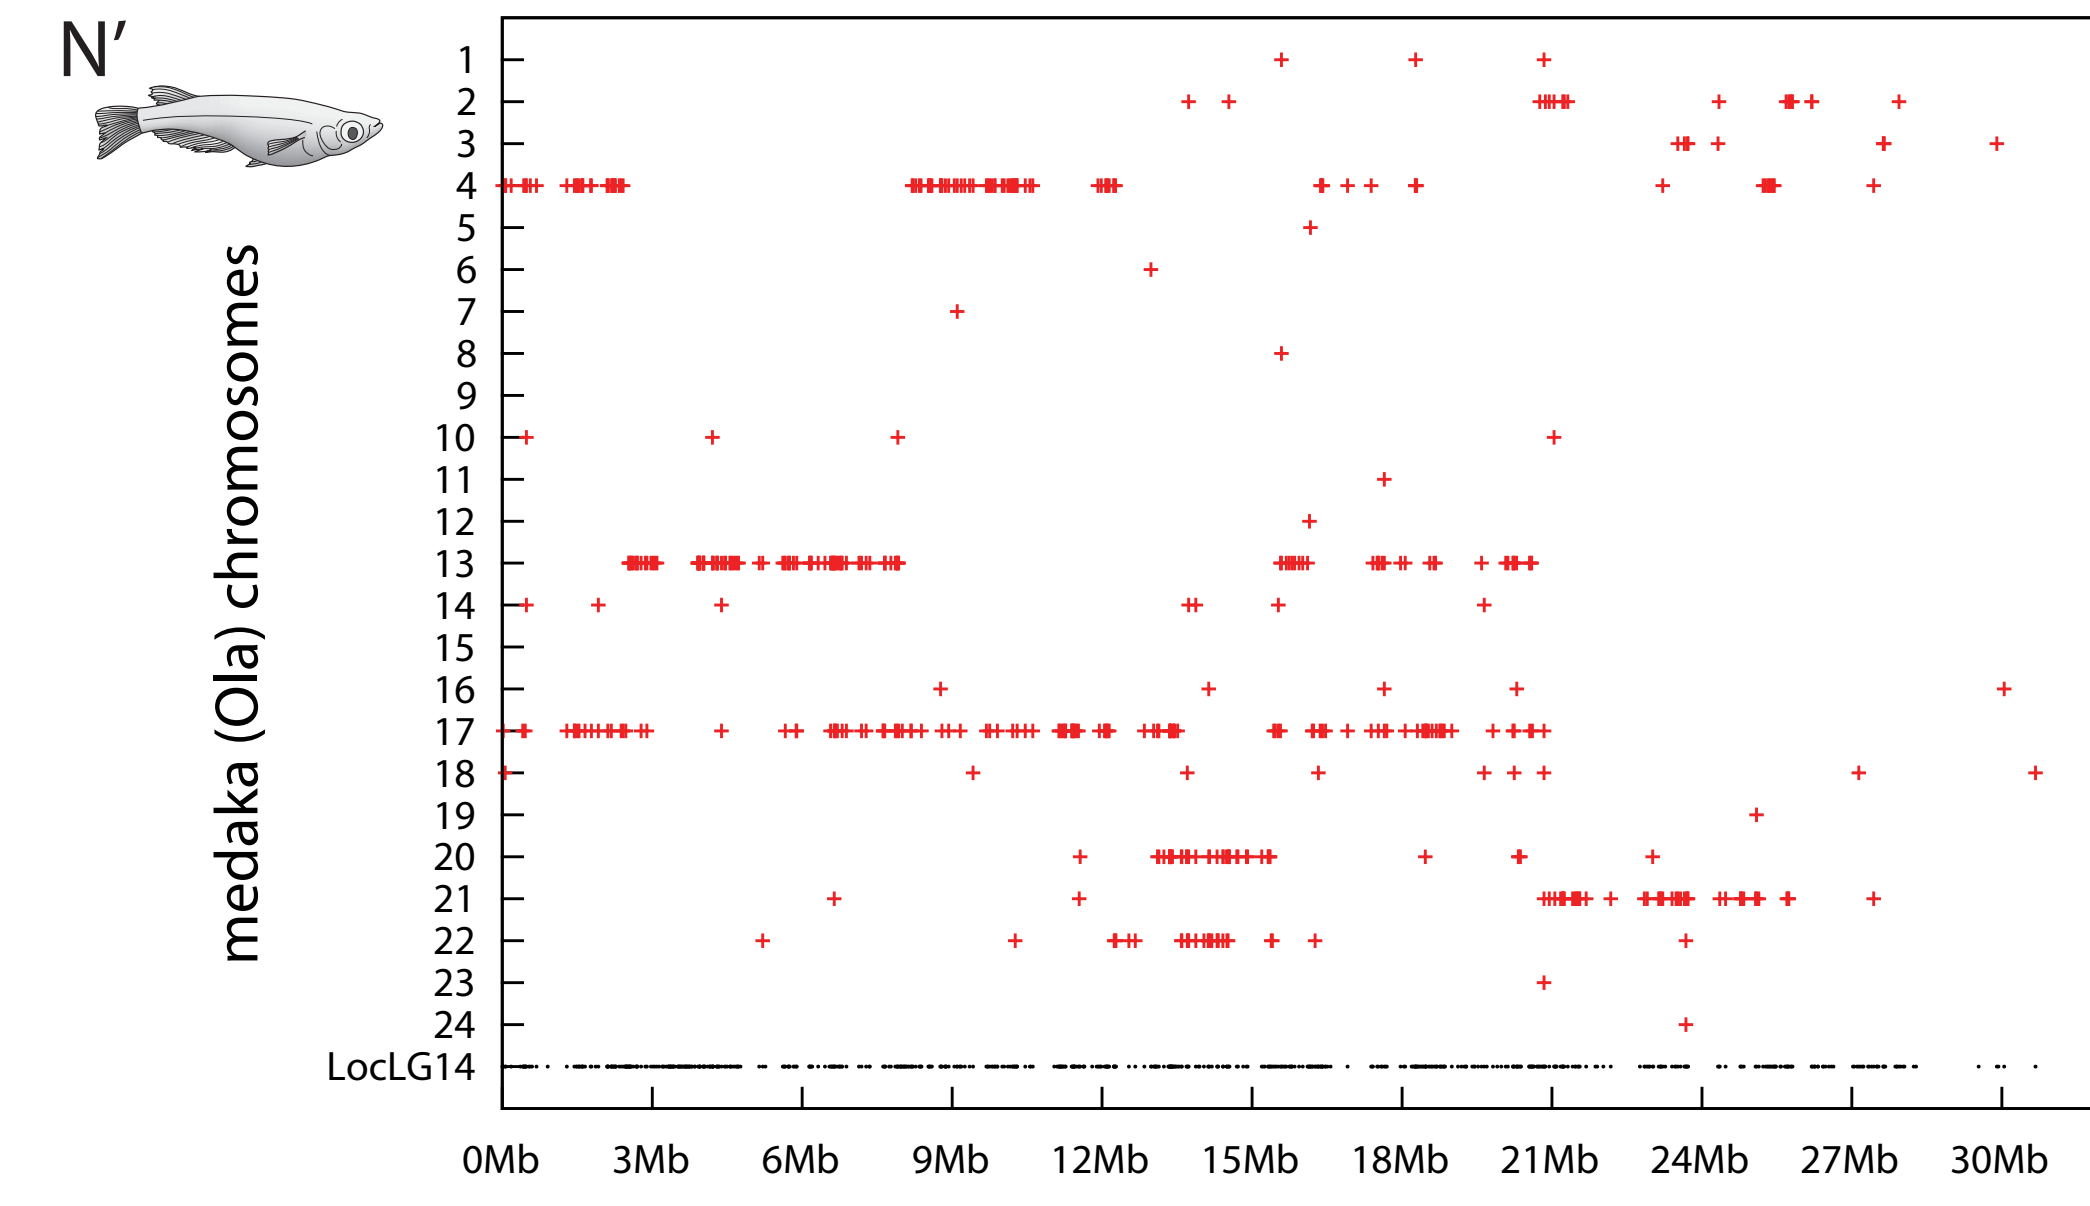

O Spotted Gar Linkage Group 15

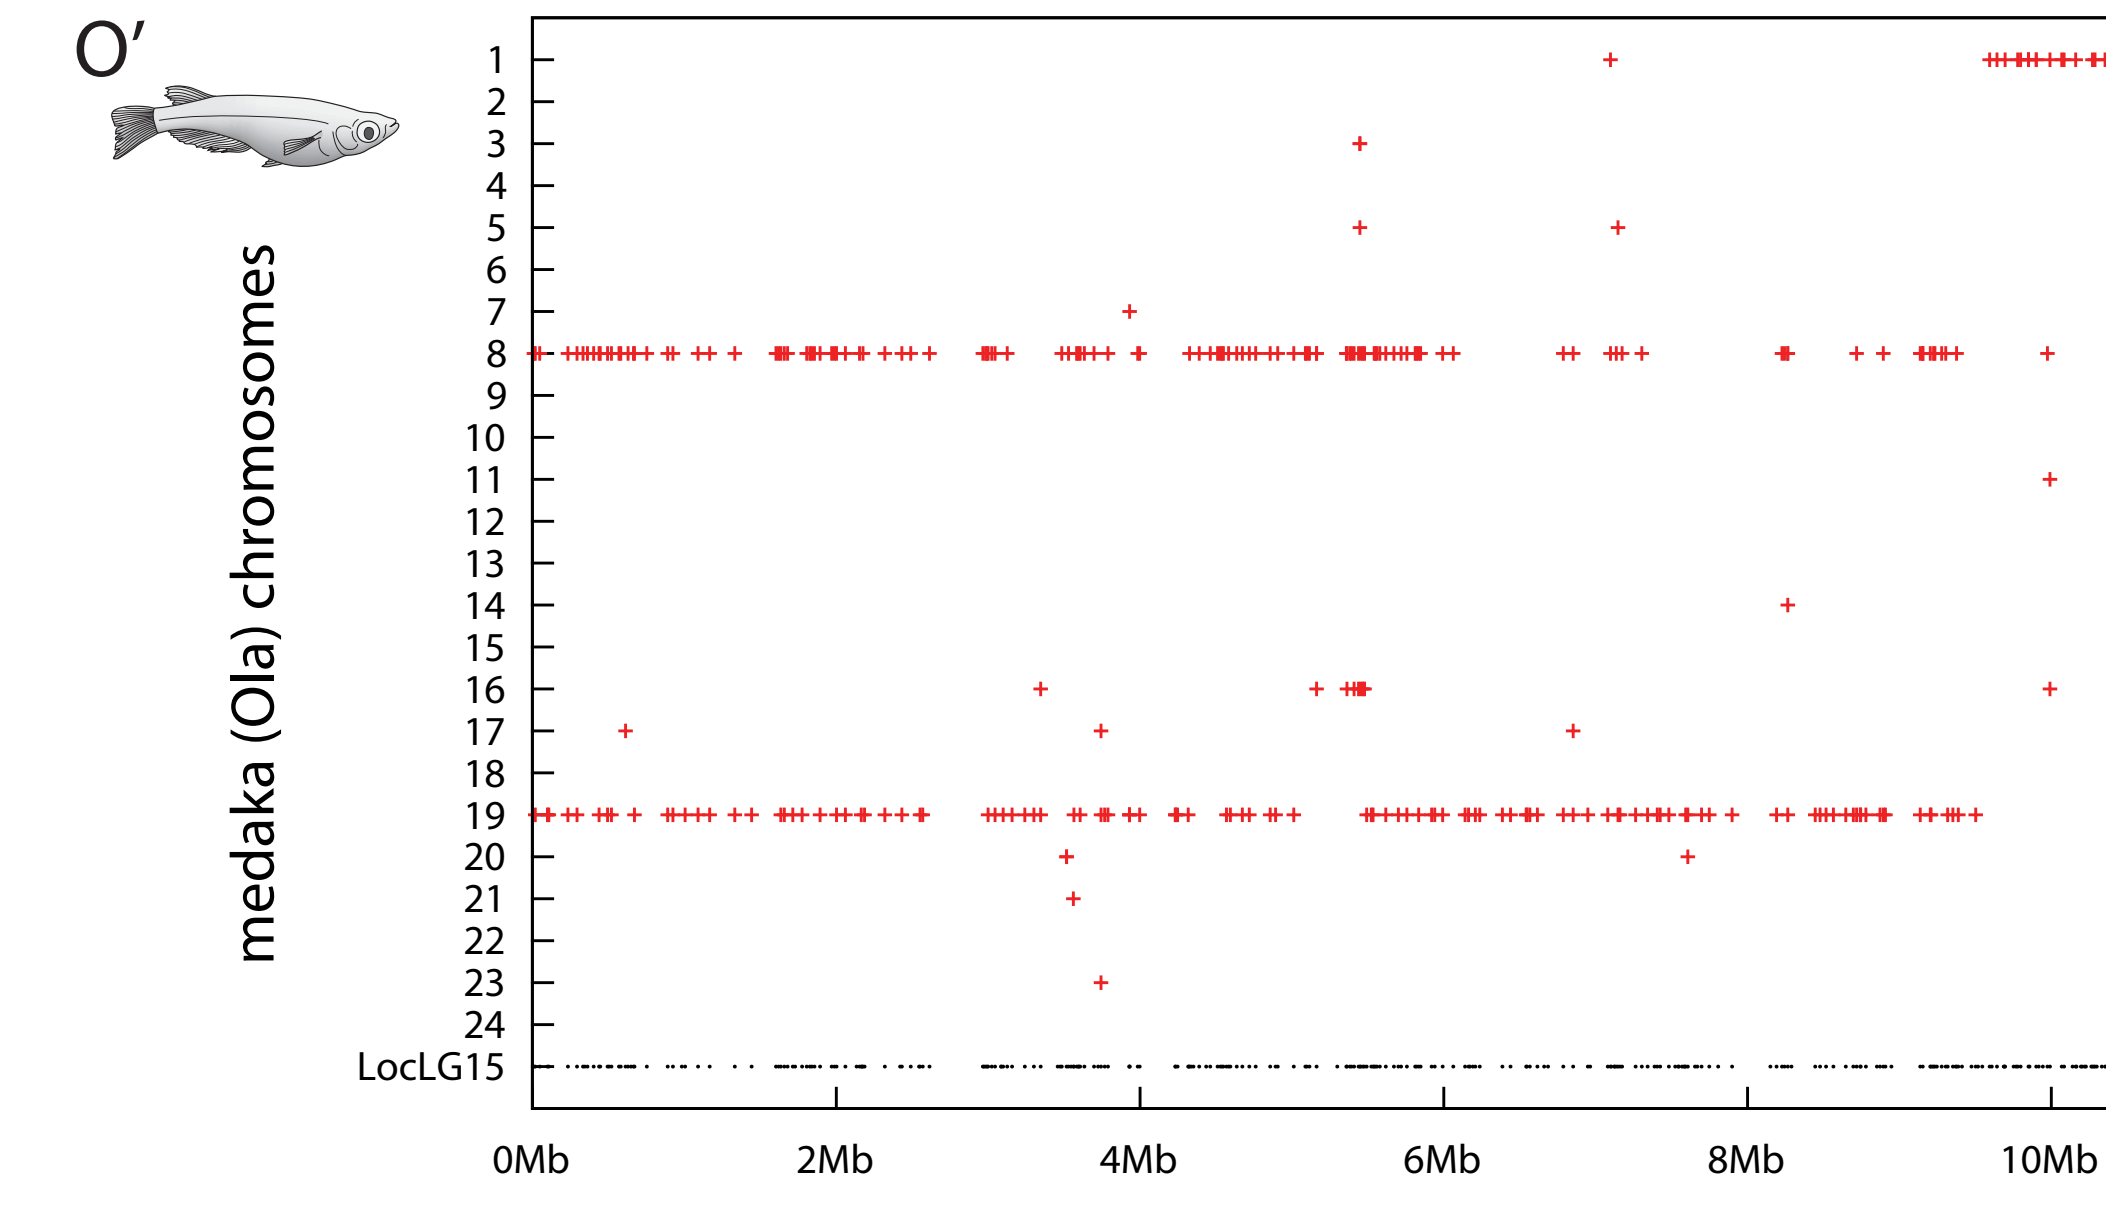

P Spotted Gar Linkage Group 16

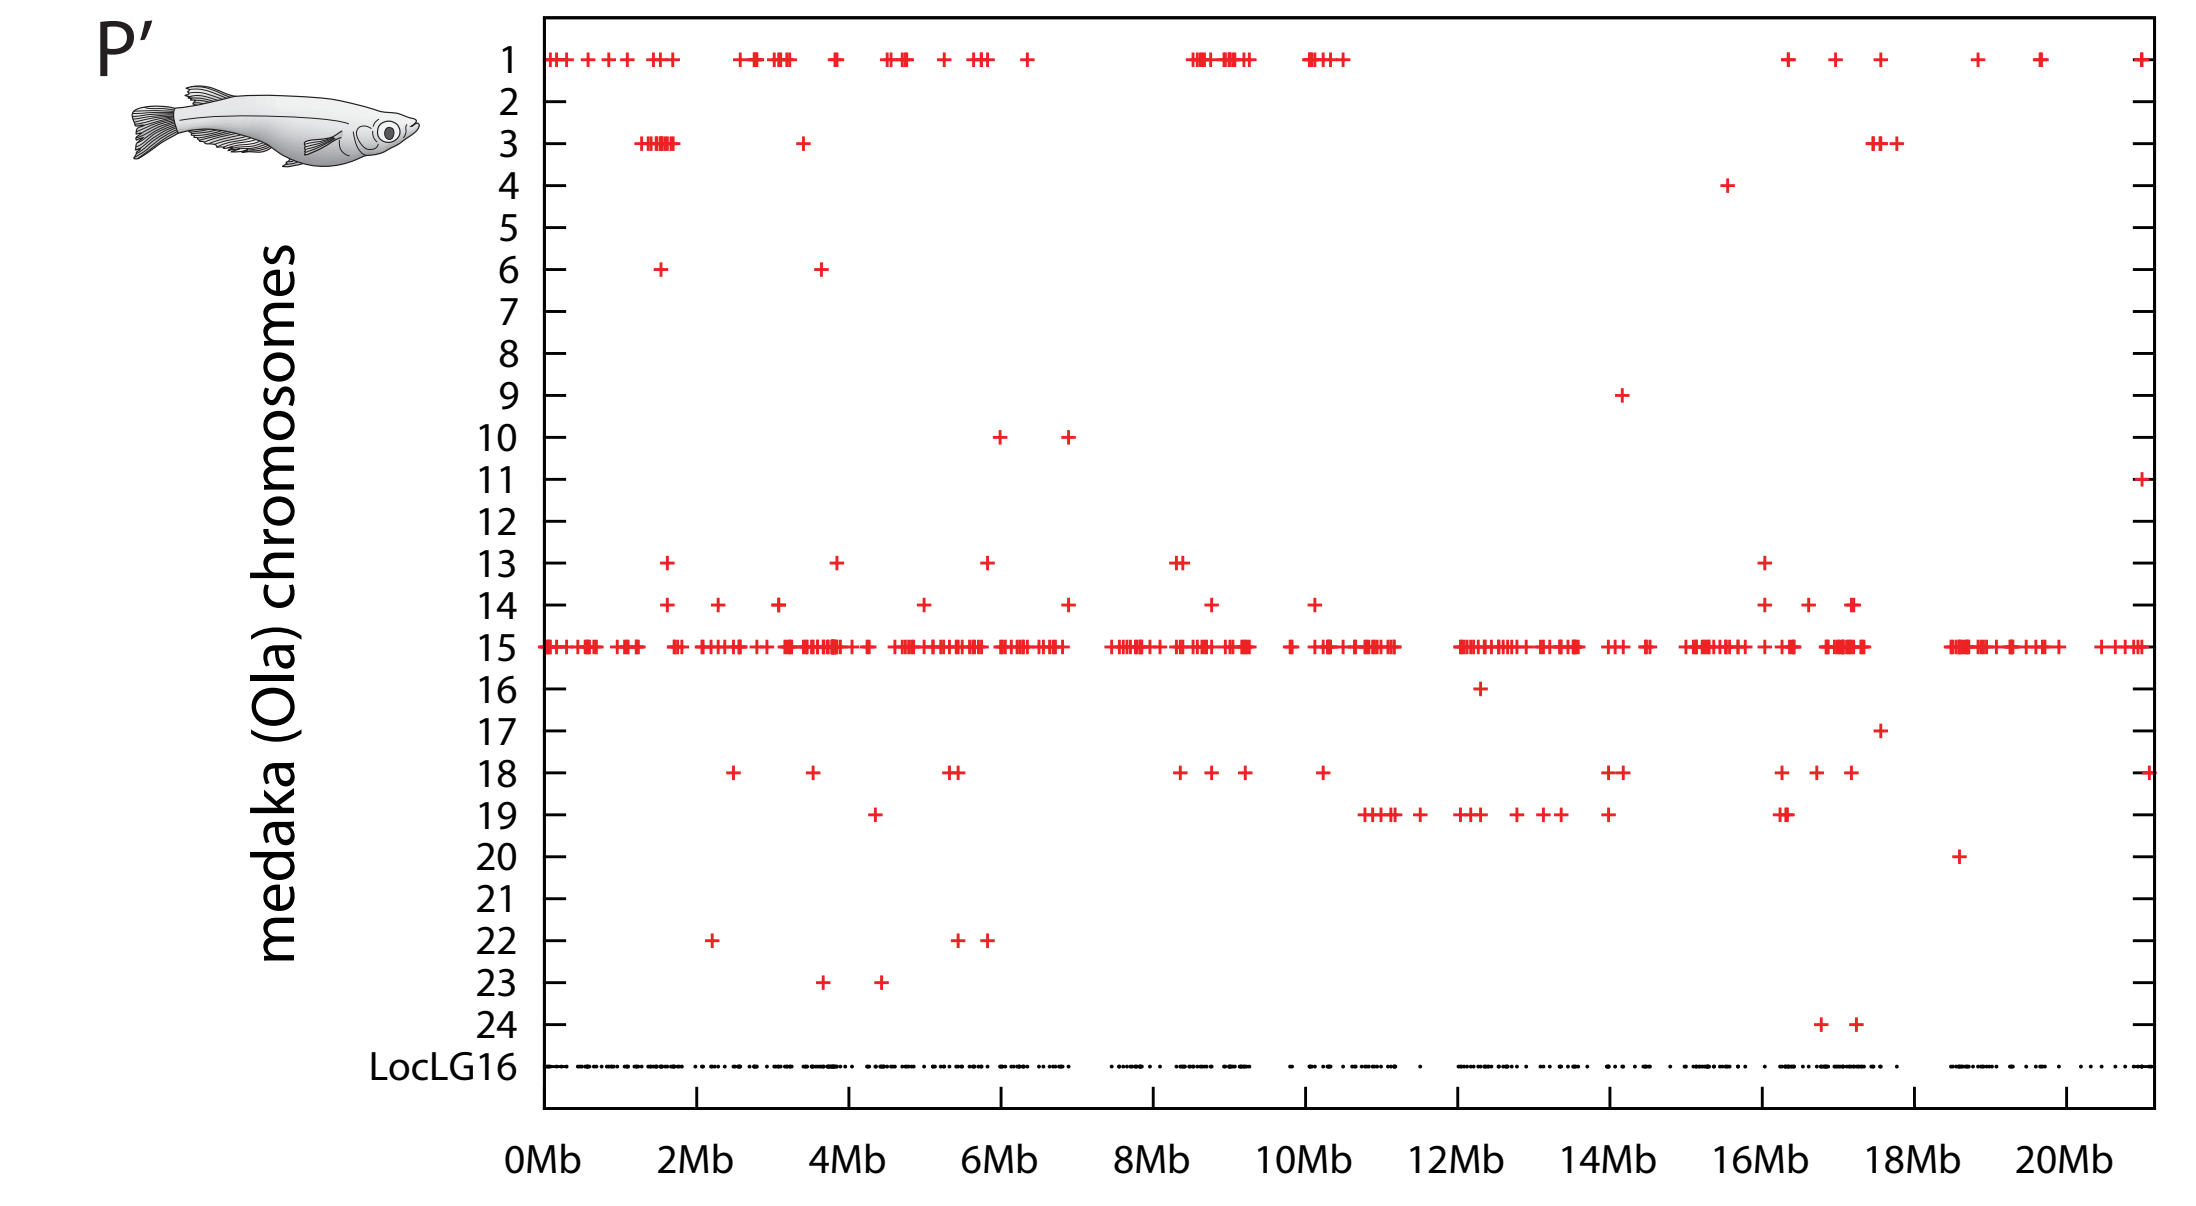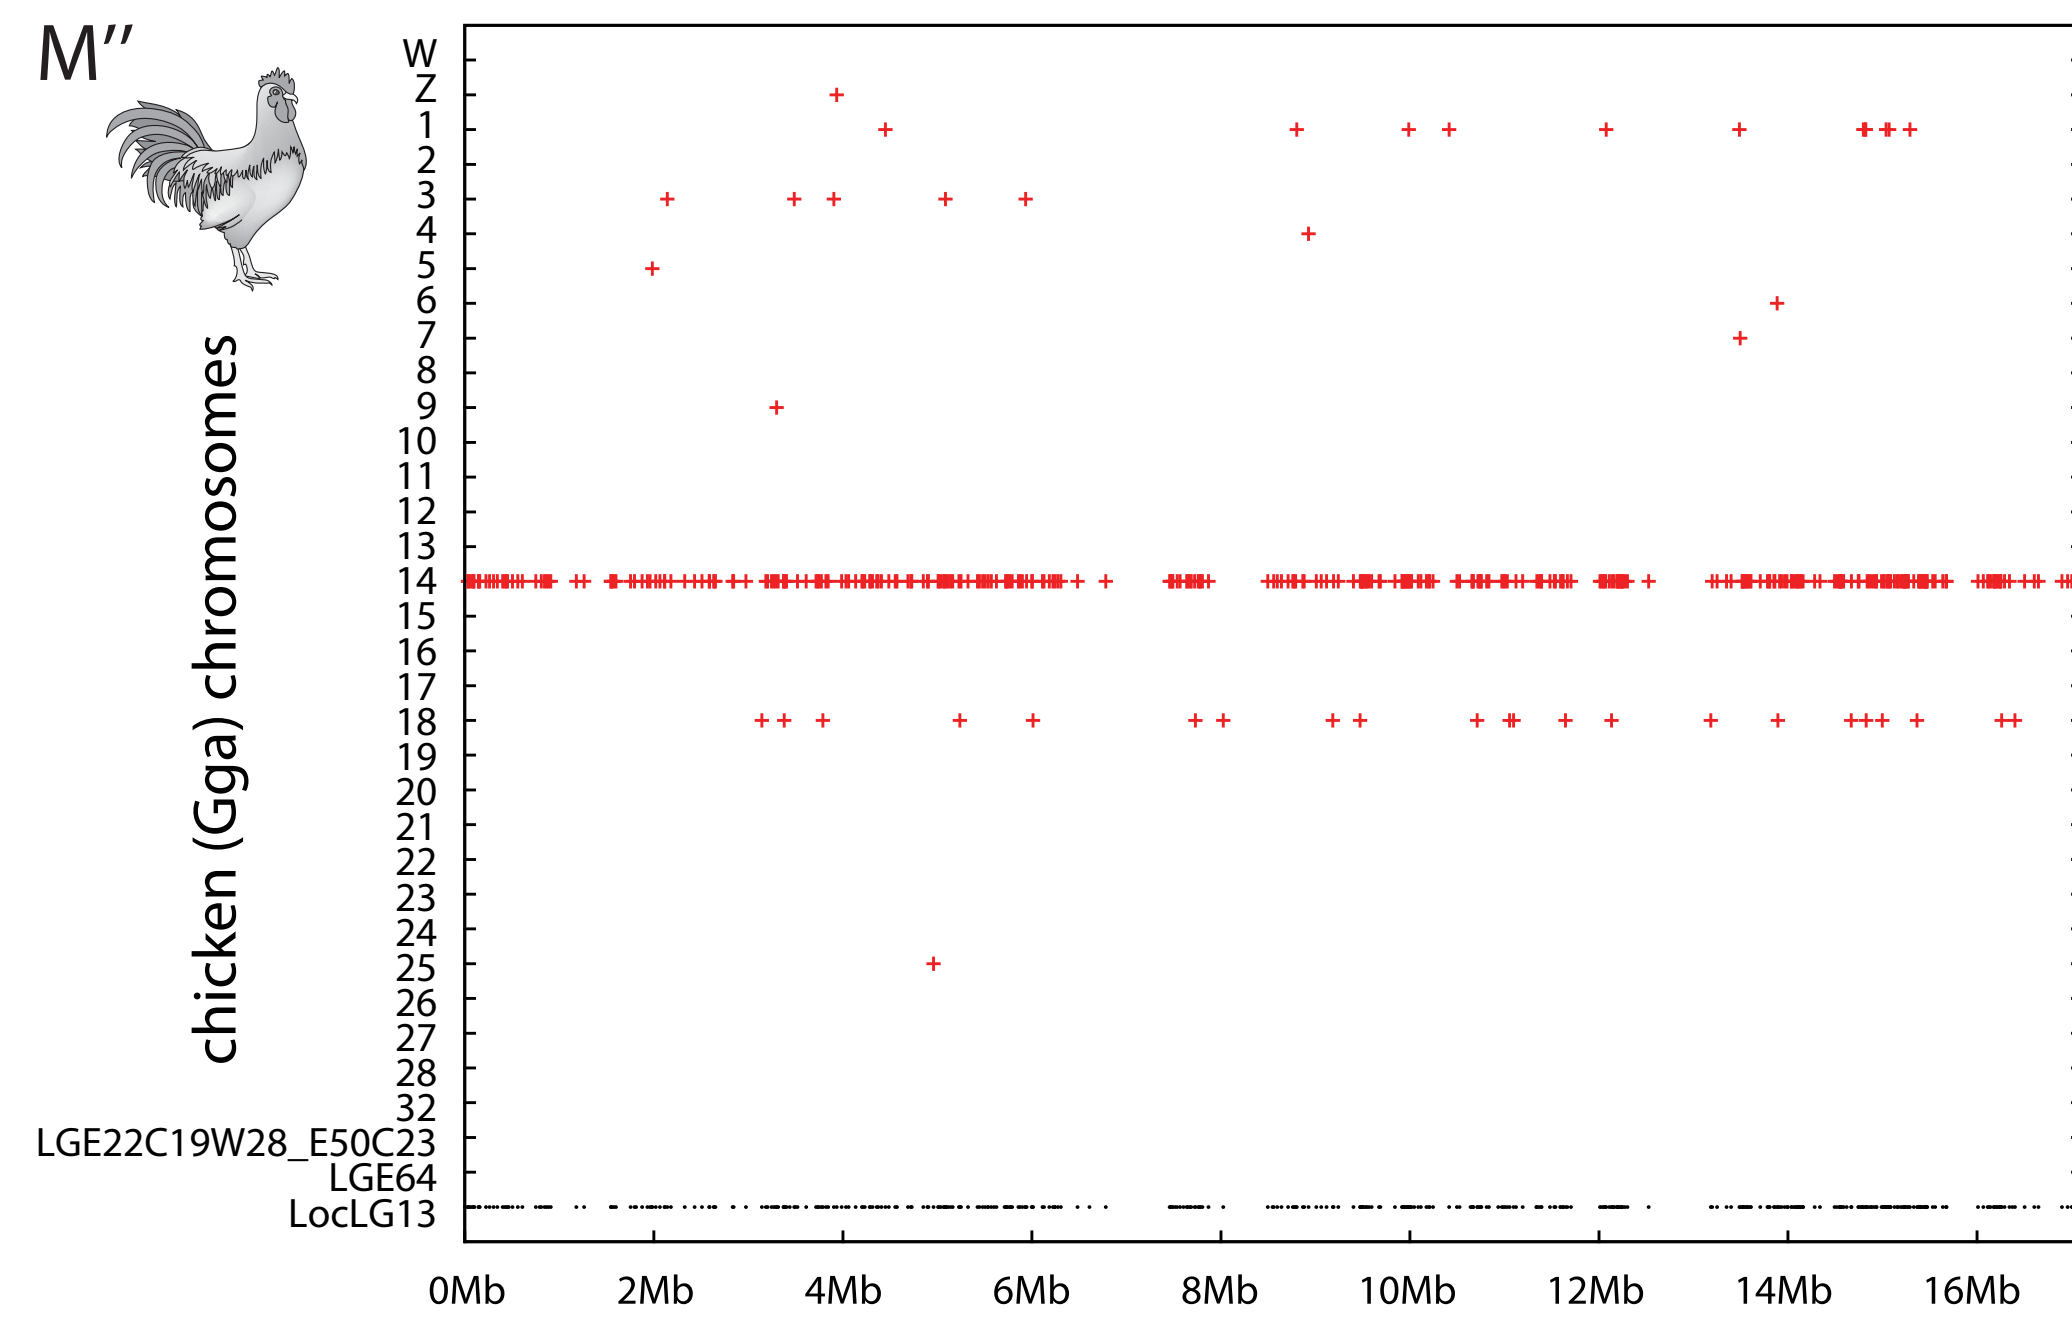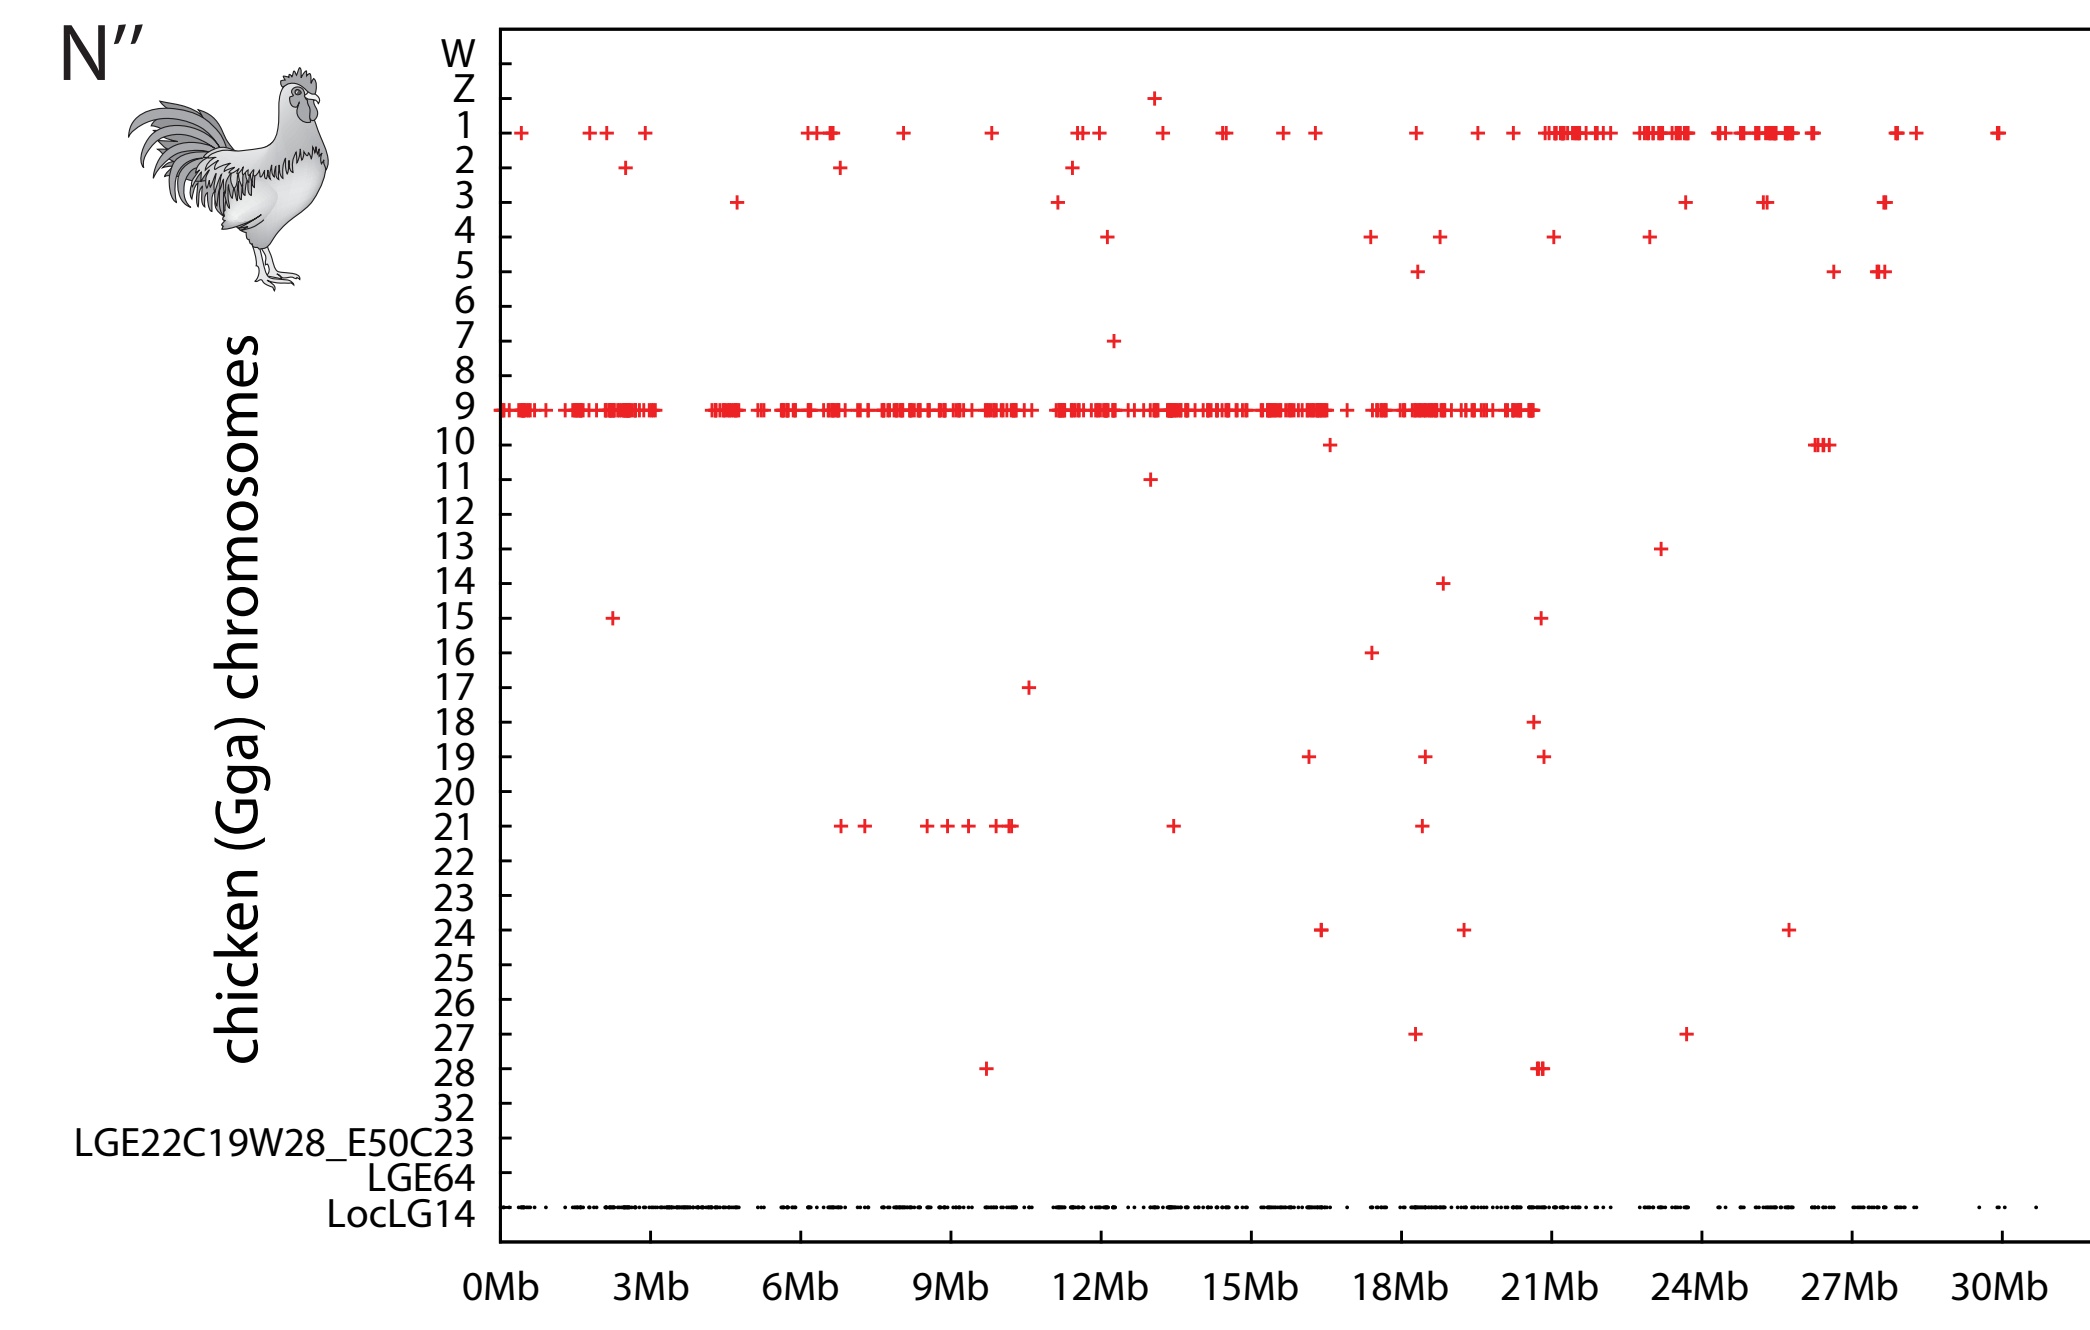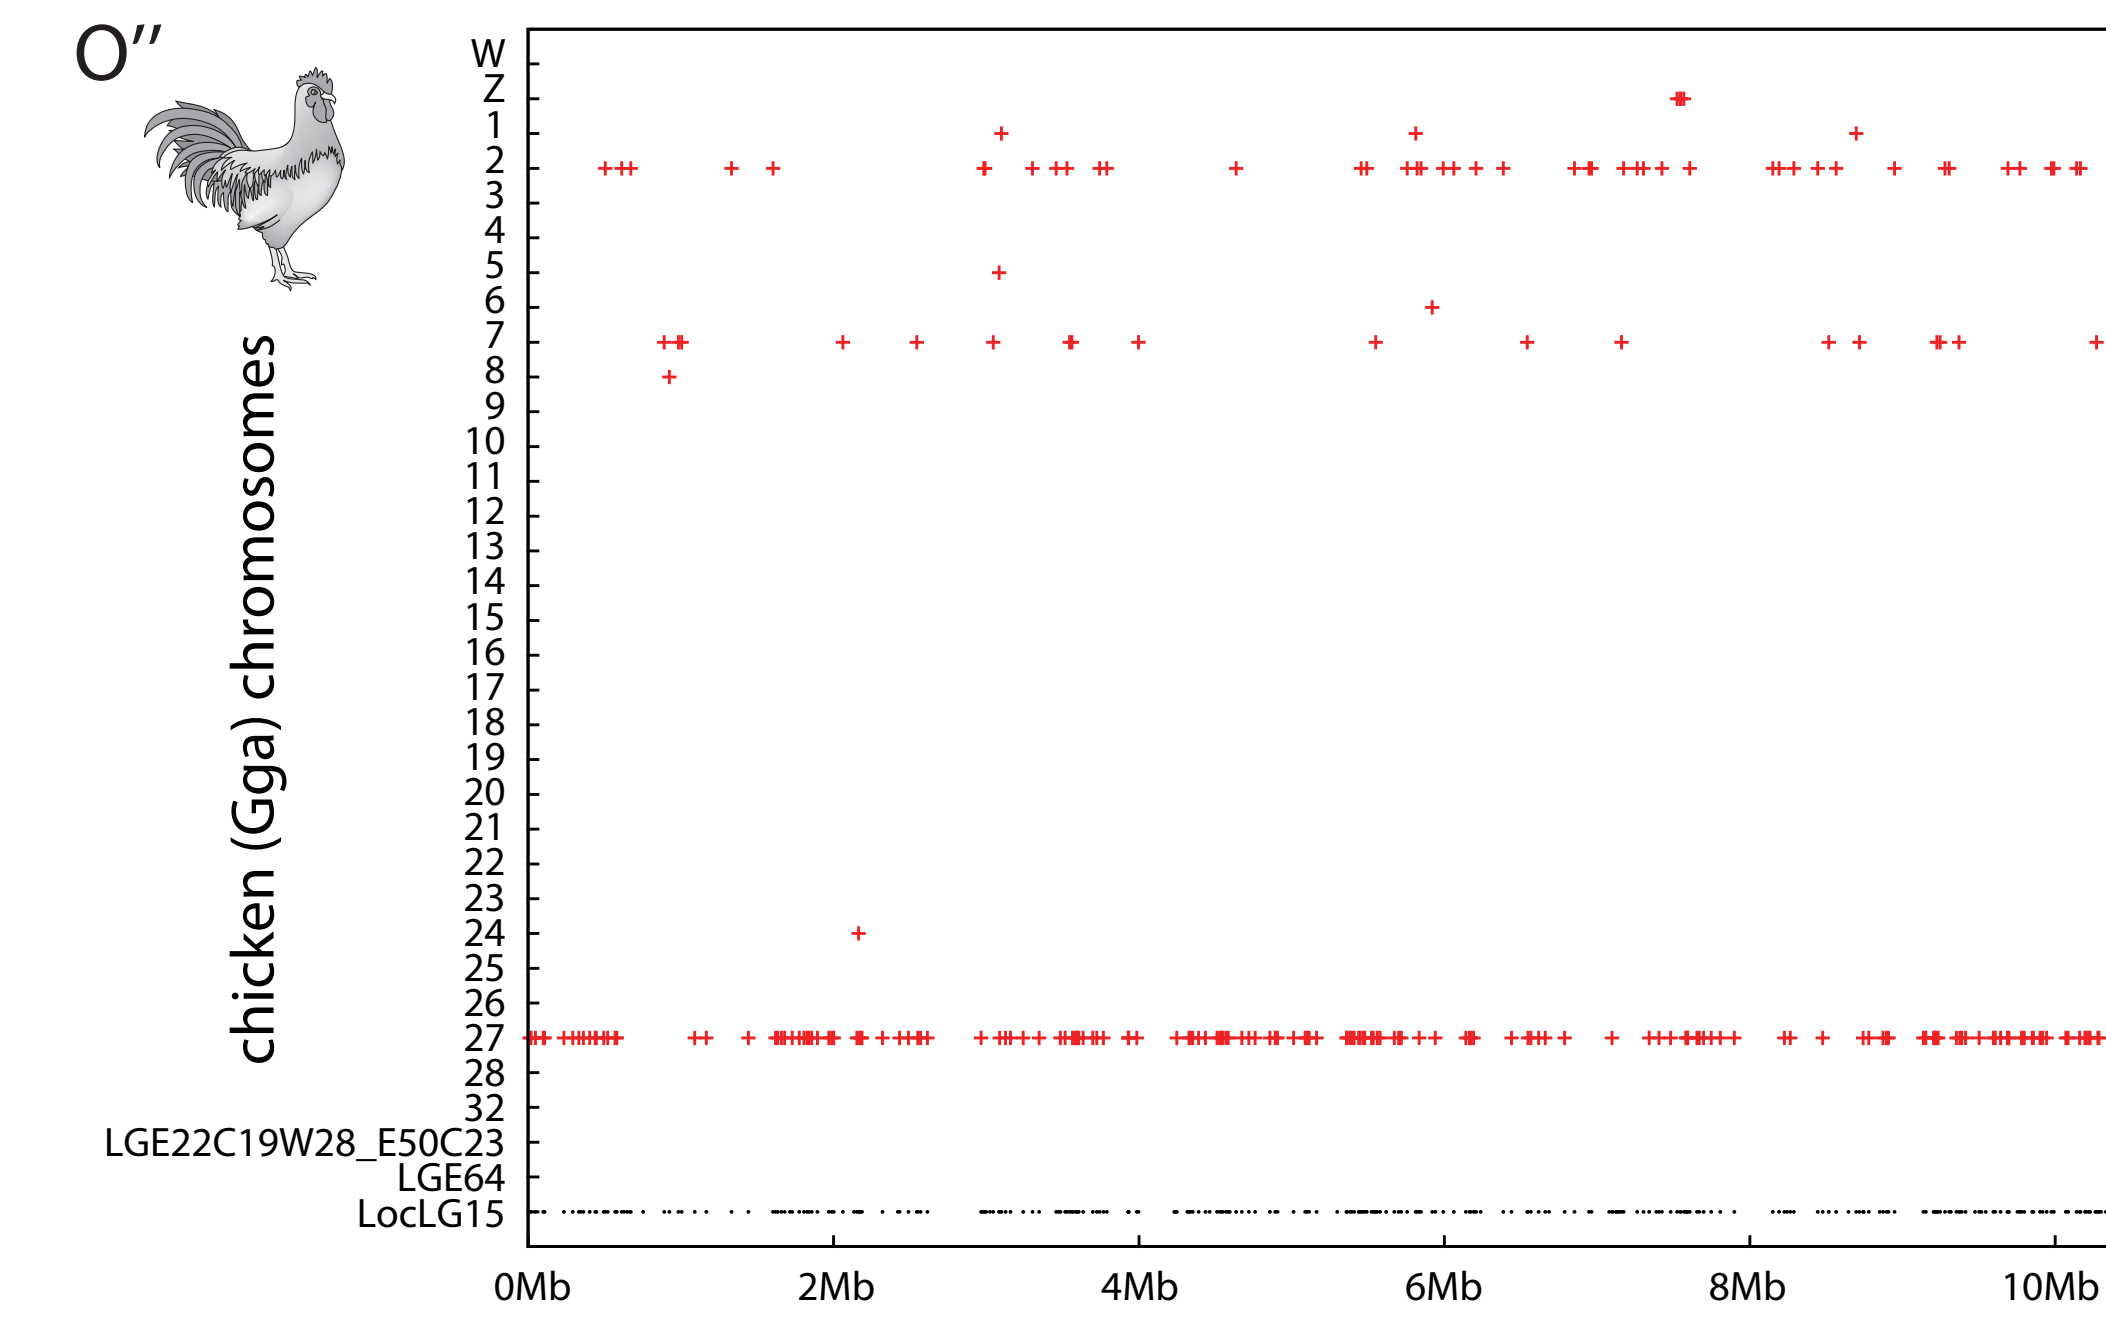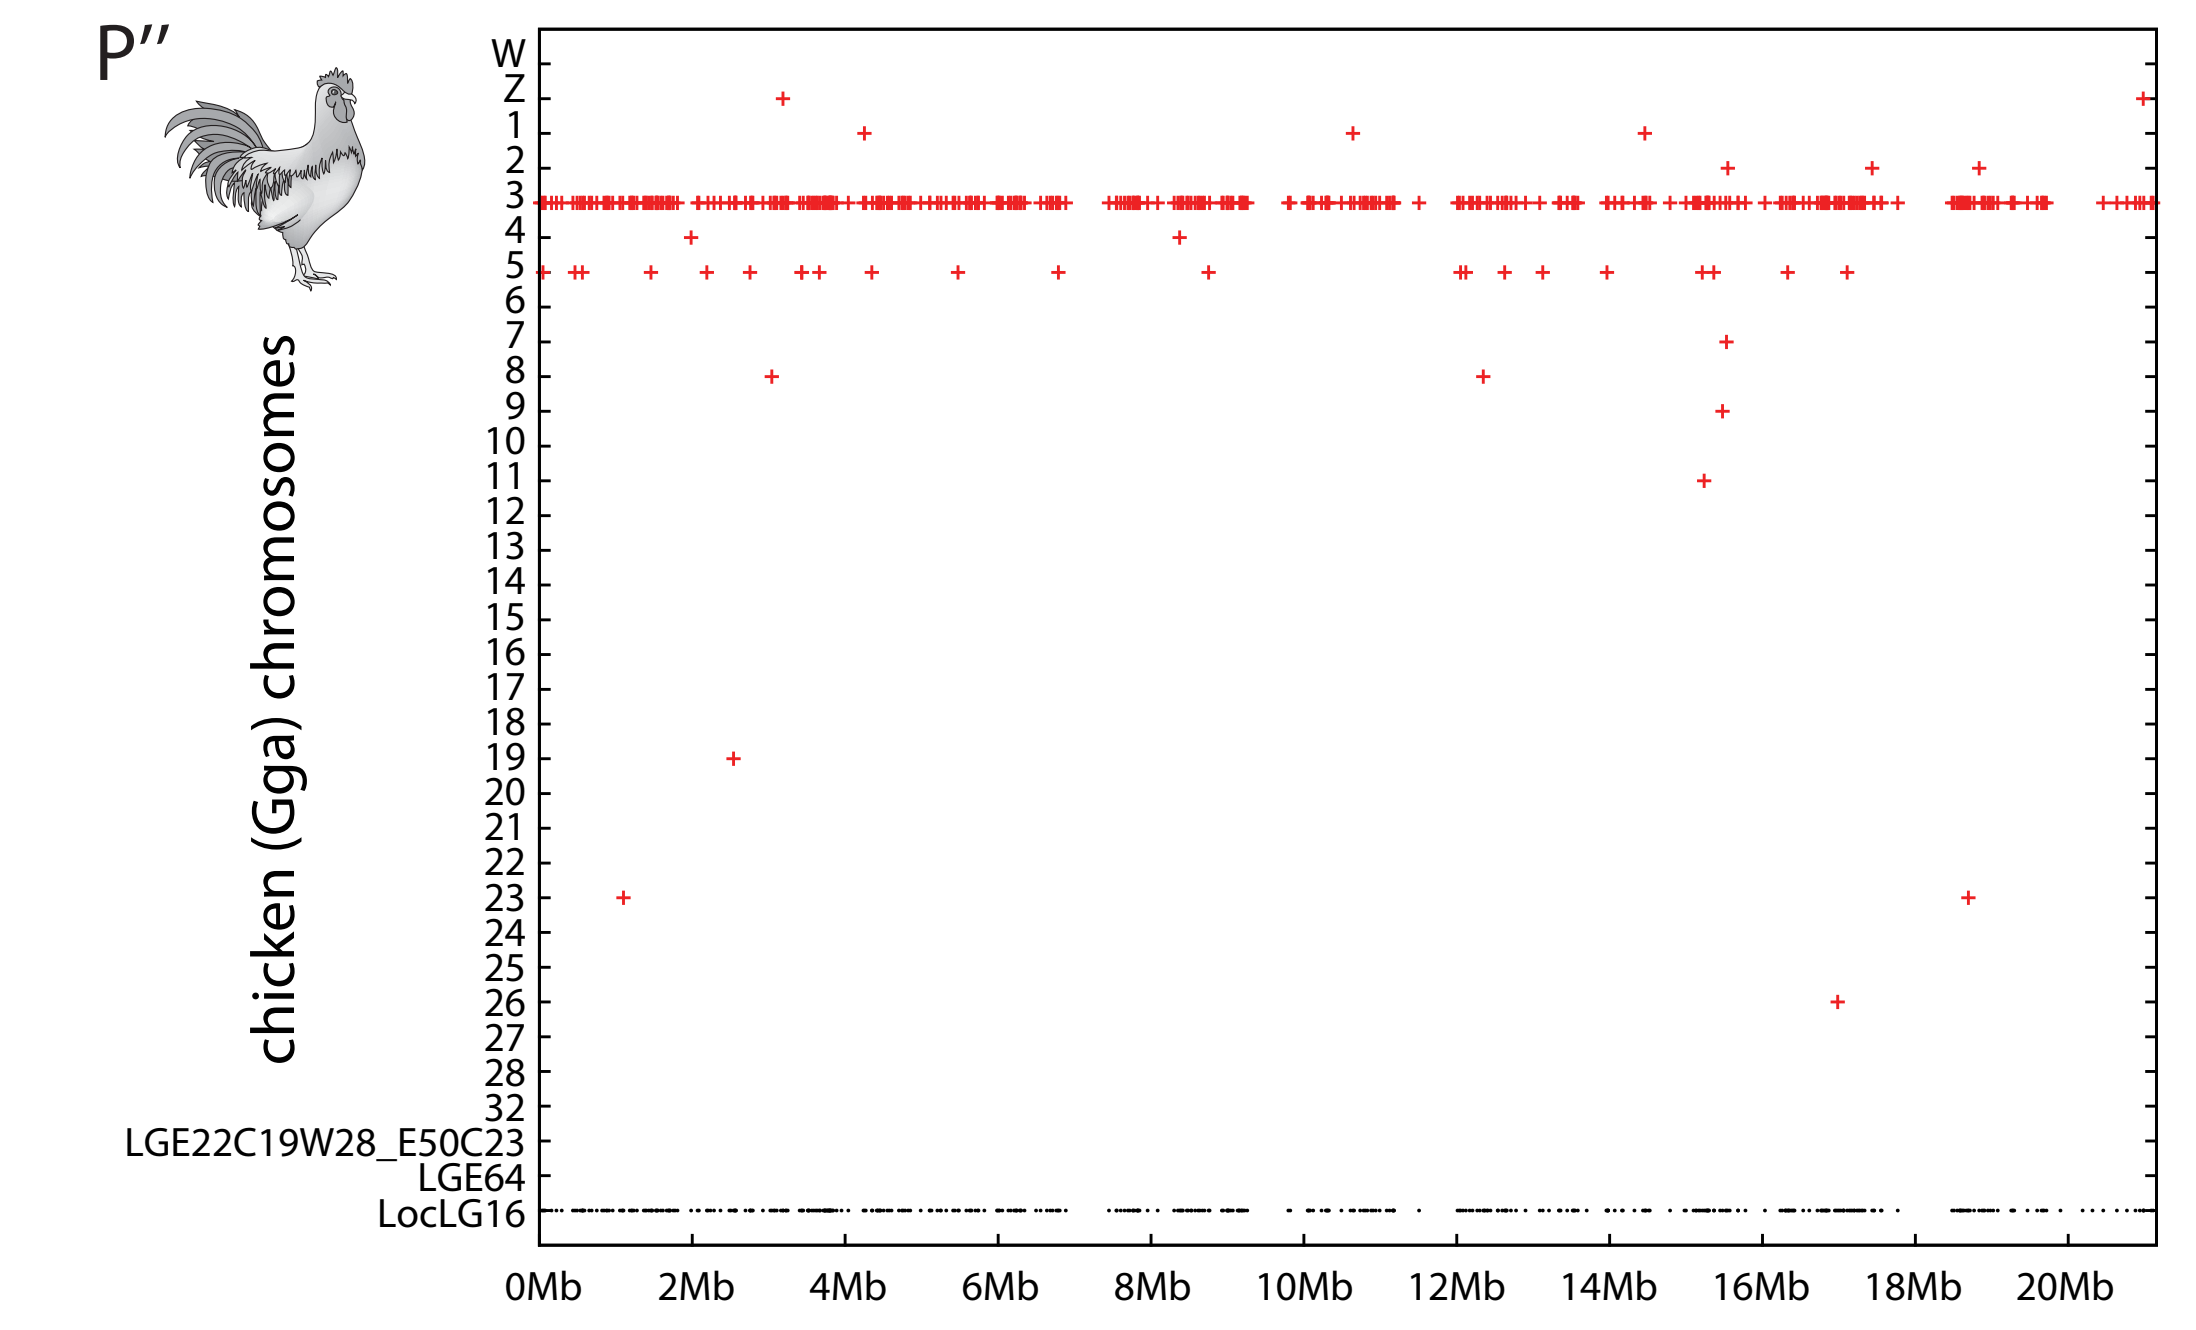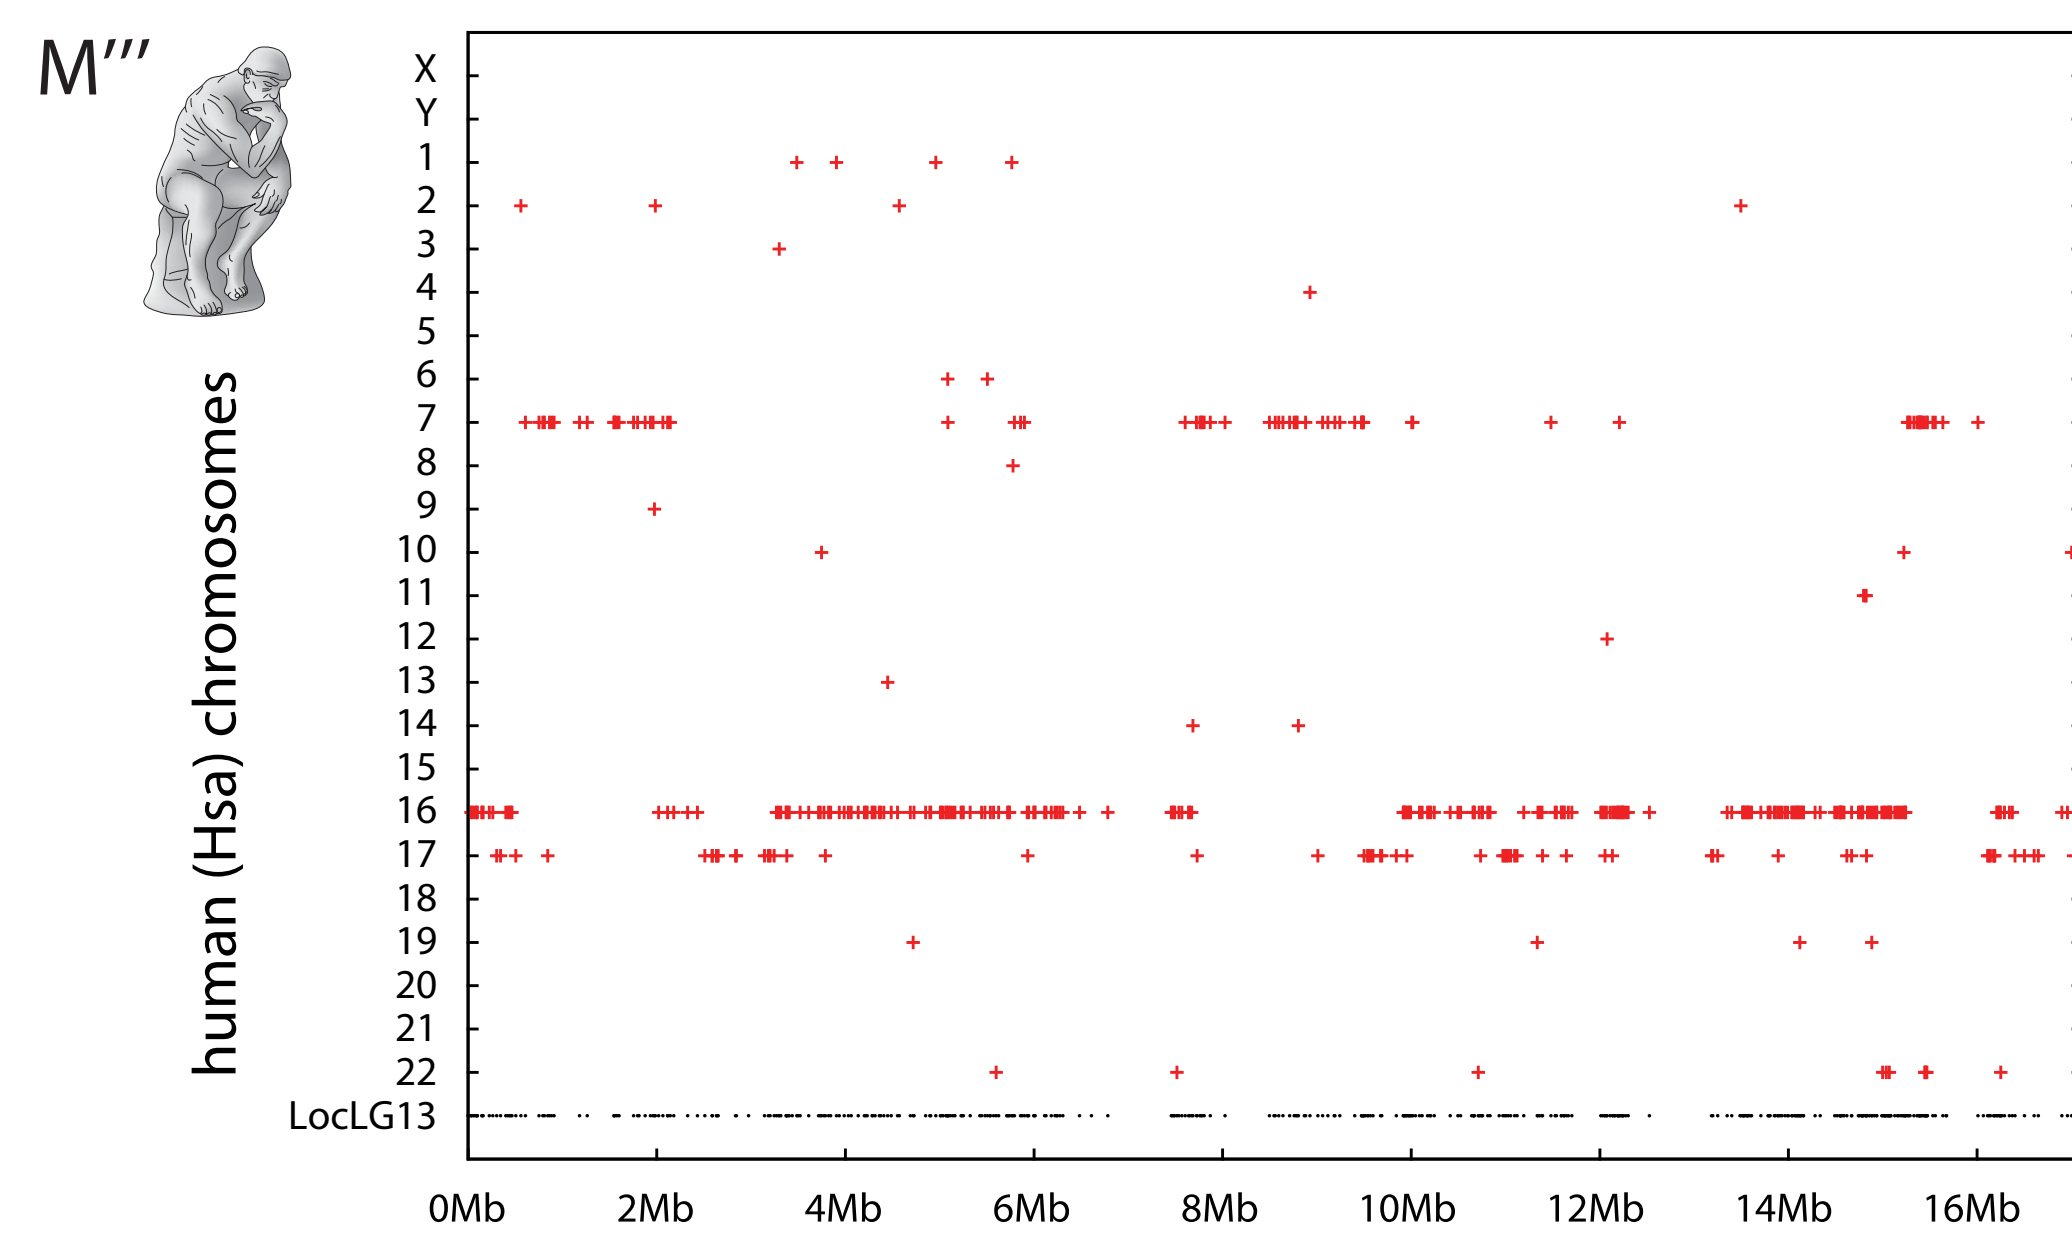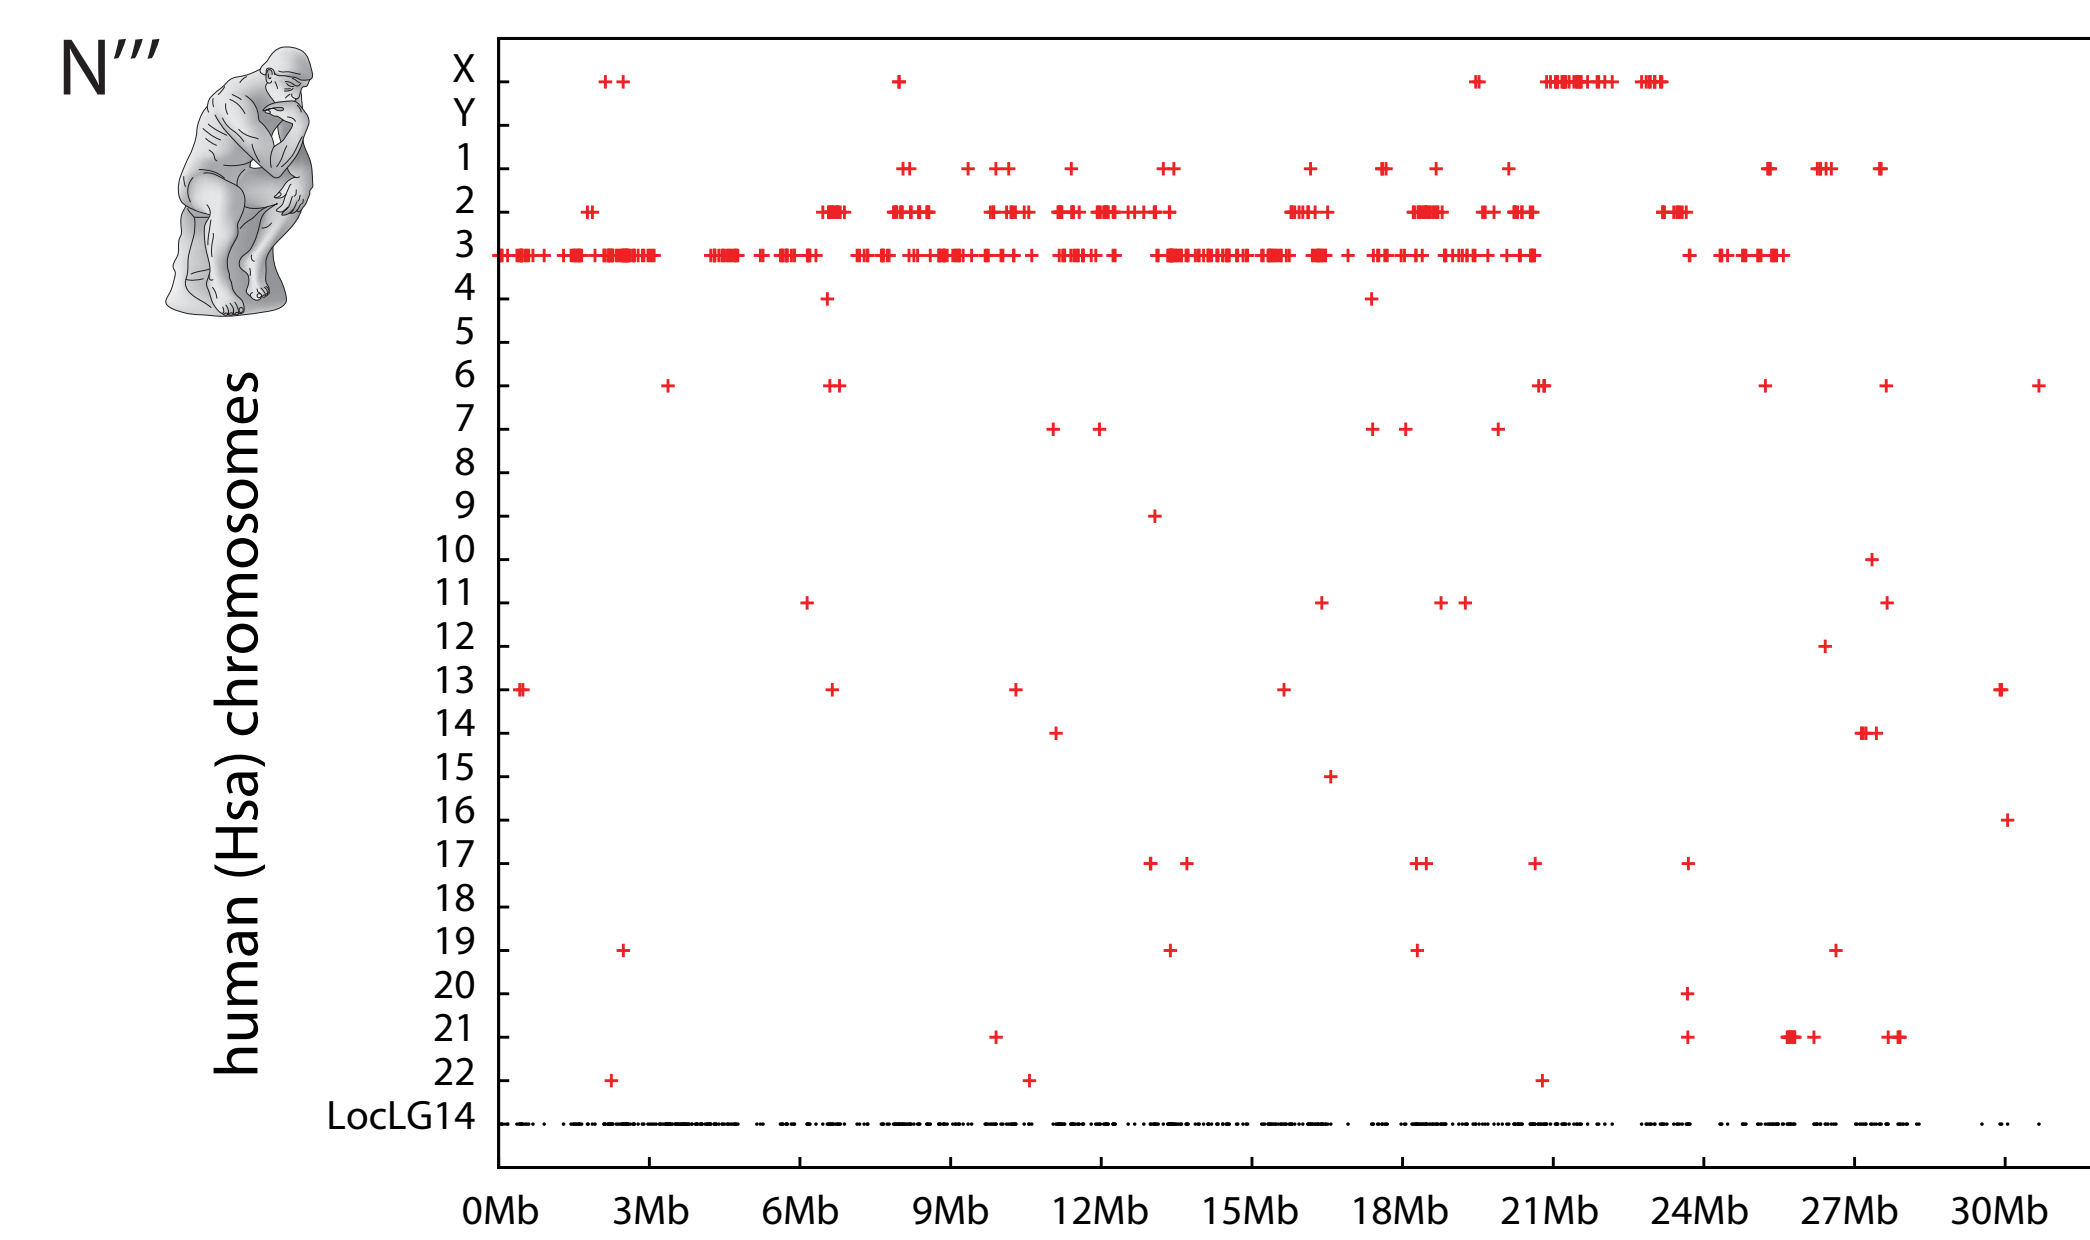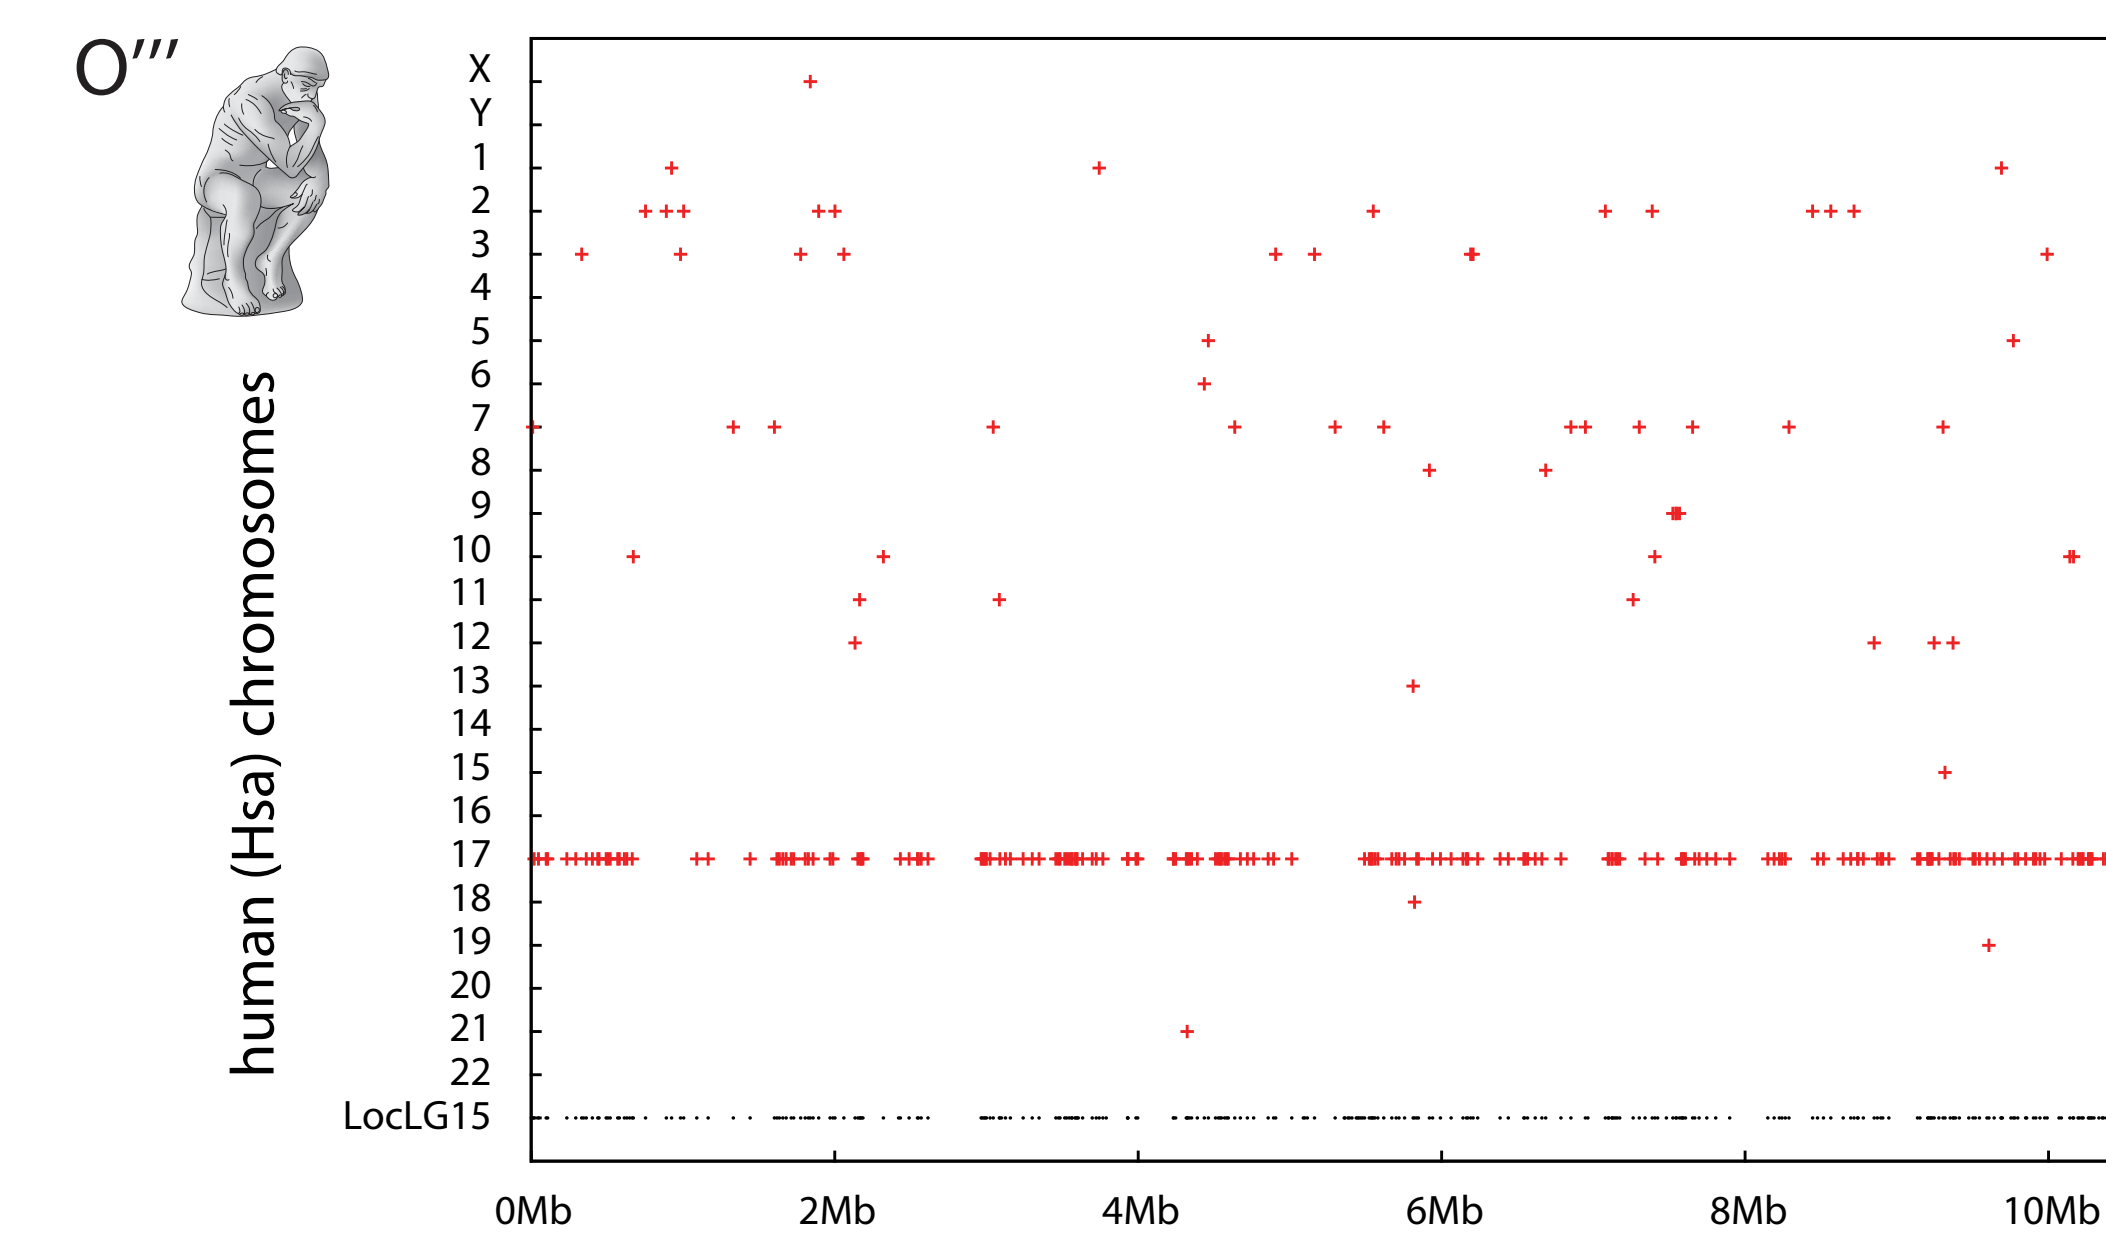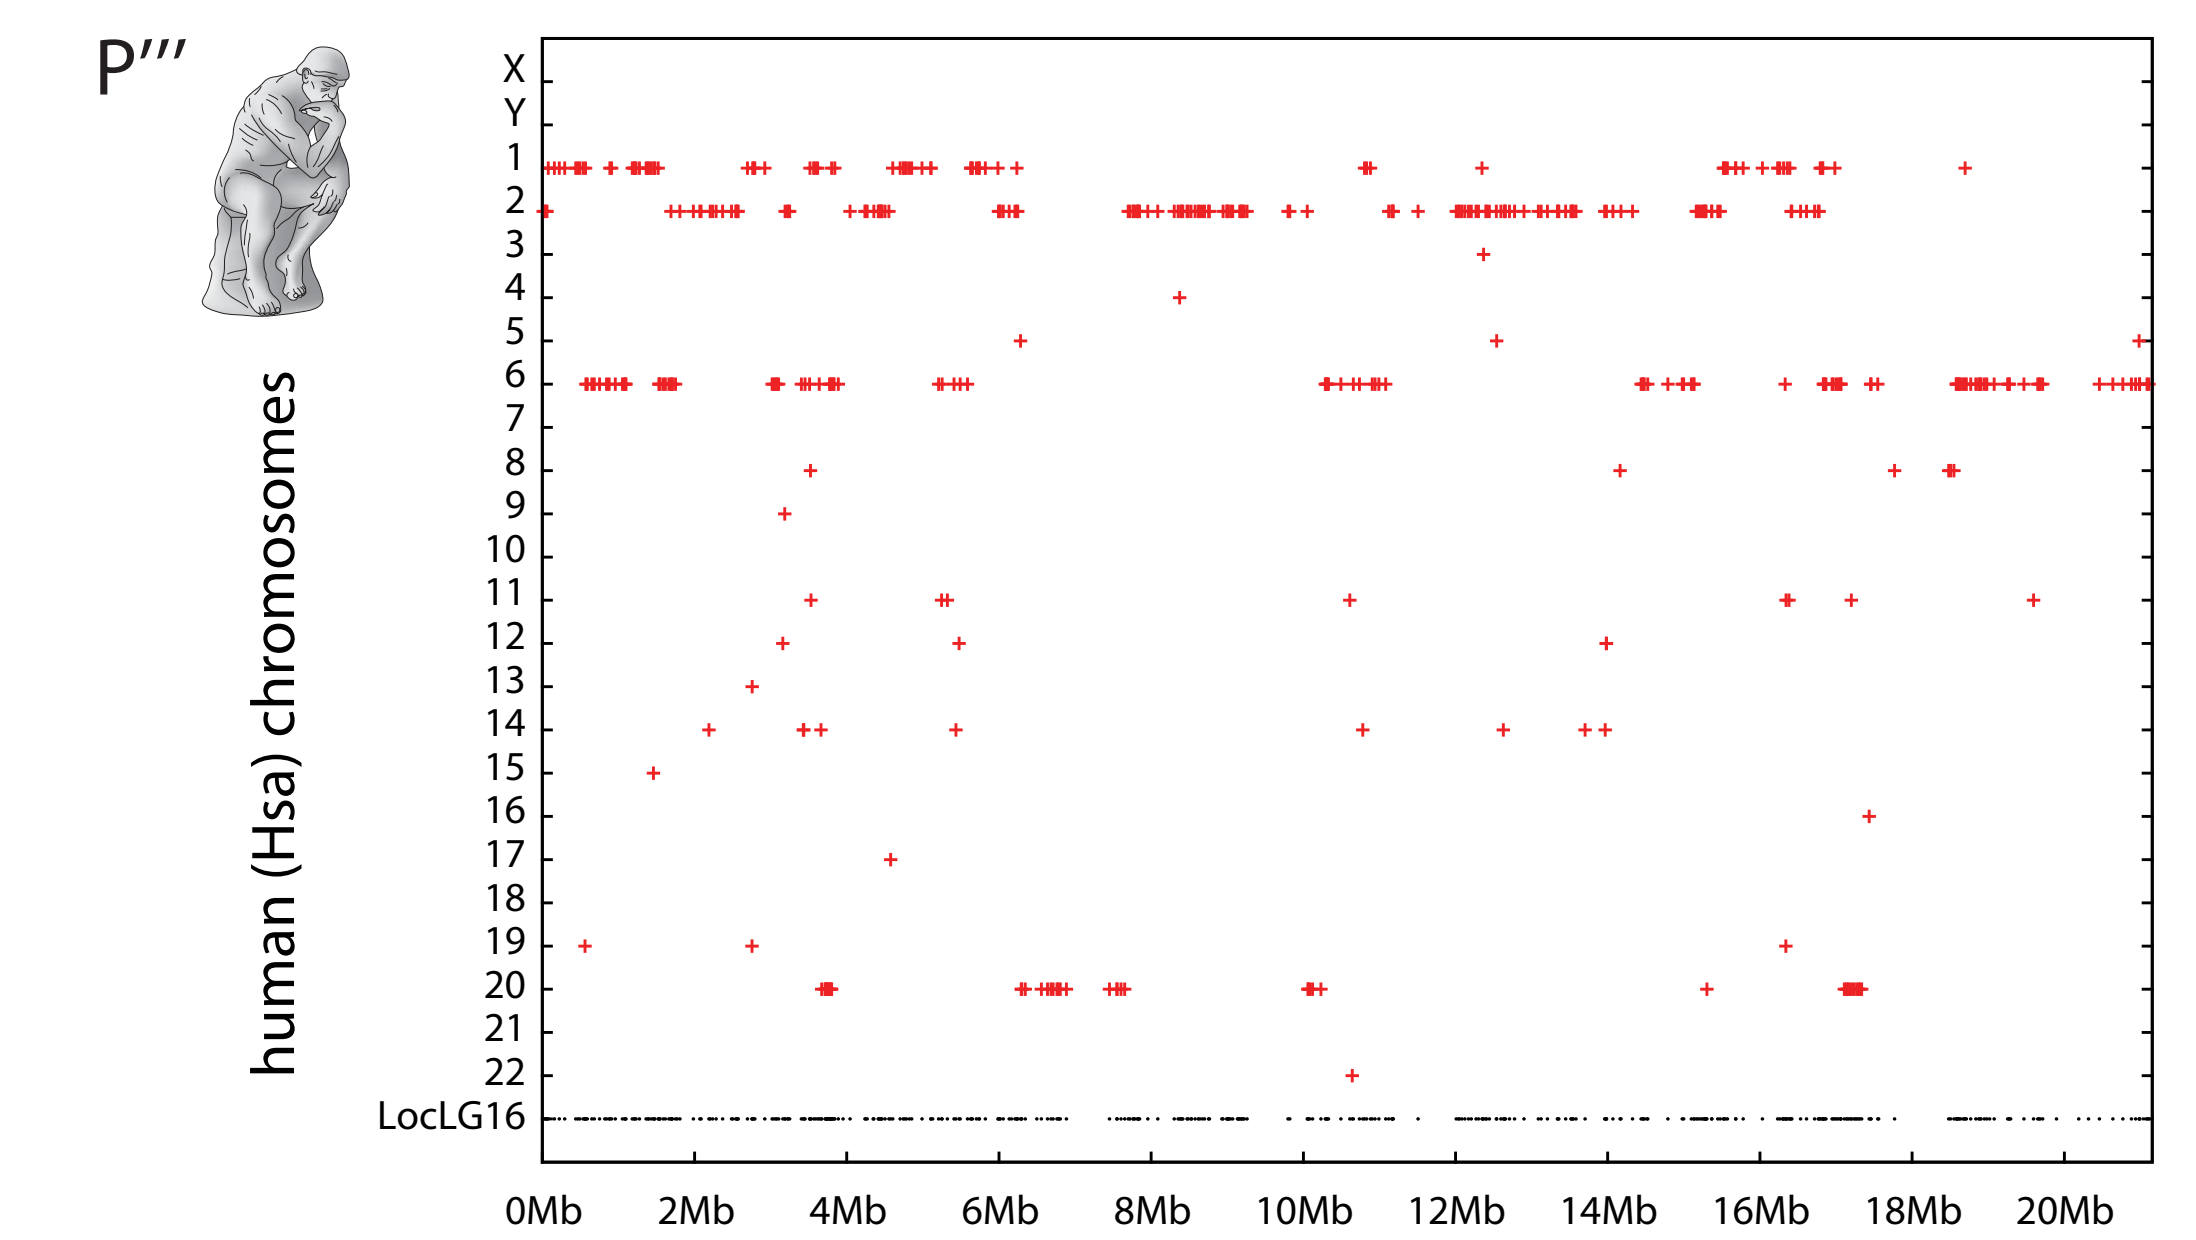

 spotted gar (Loc) LG13 Orthologs

 spotted gar (Loc) LG14 Orthologs

 spotted gar (Loc) LG15 Orthologs

 spotted gar (Loc) LG16 Orthologs



Q Spotted Gar Linkage Group 17

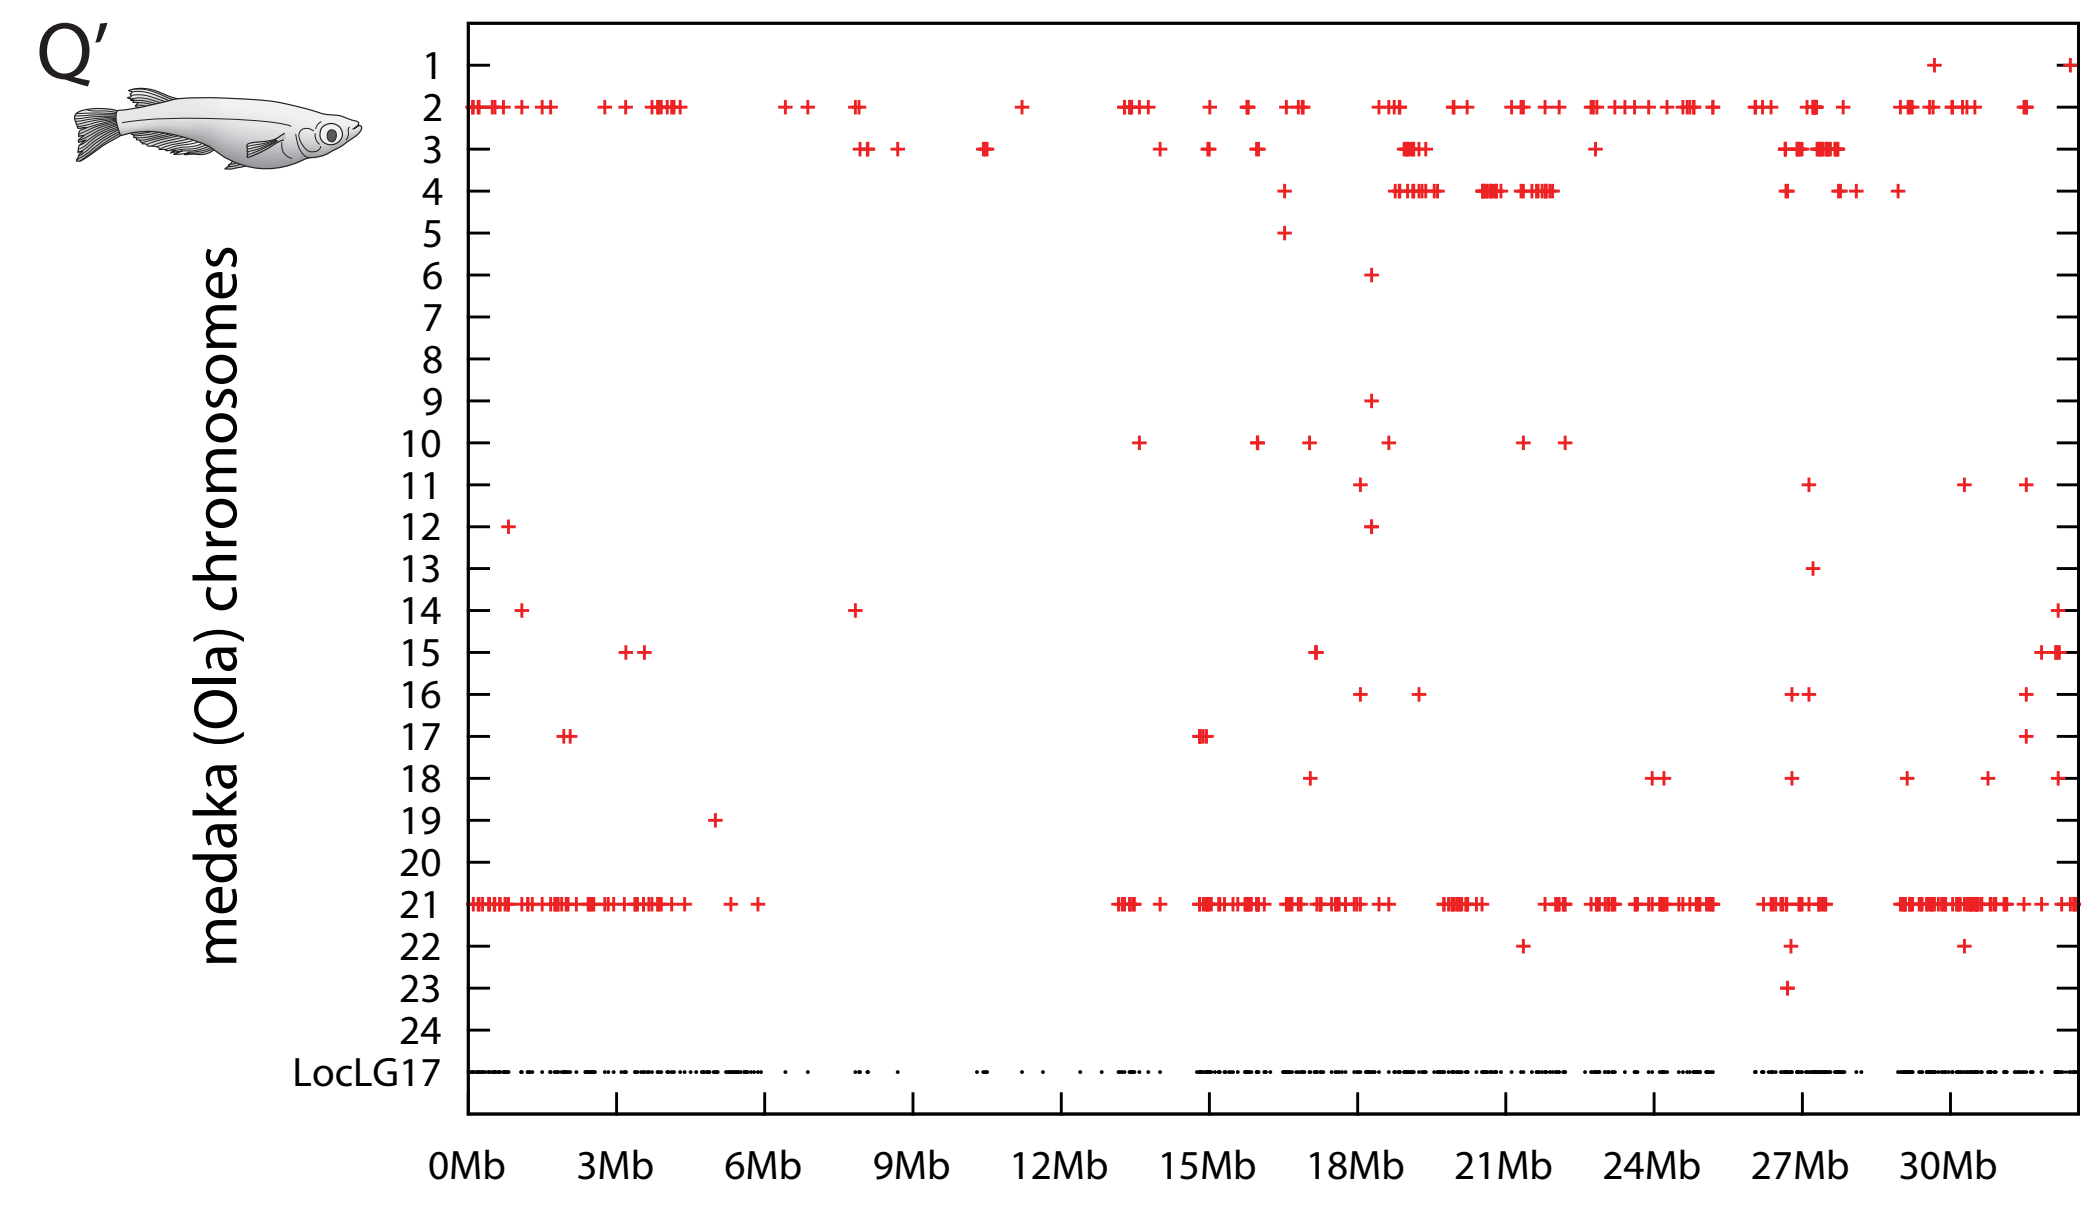

R Spotted Gar Linkage Group 18

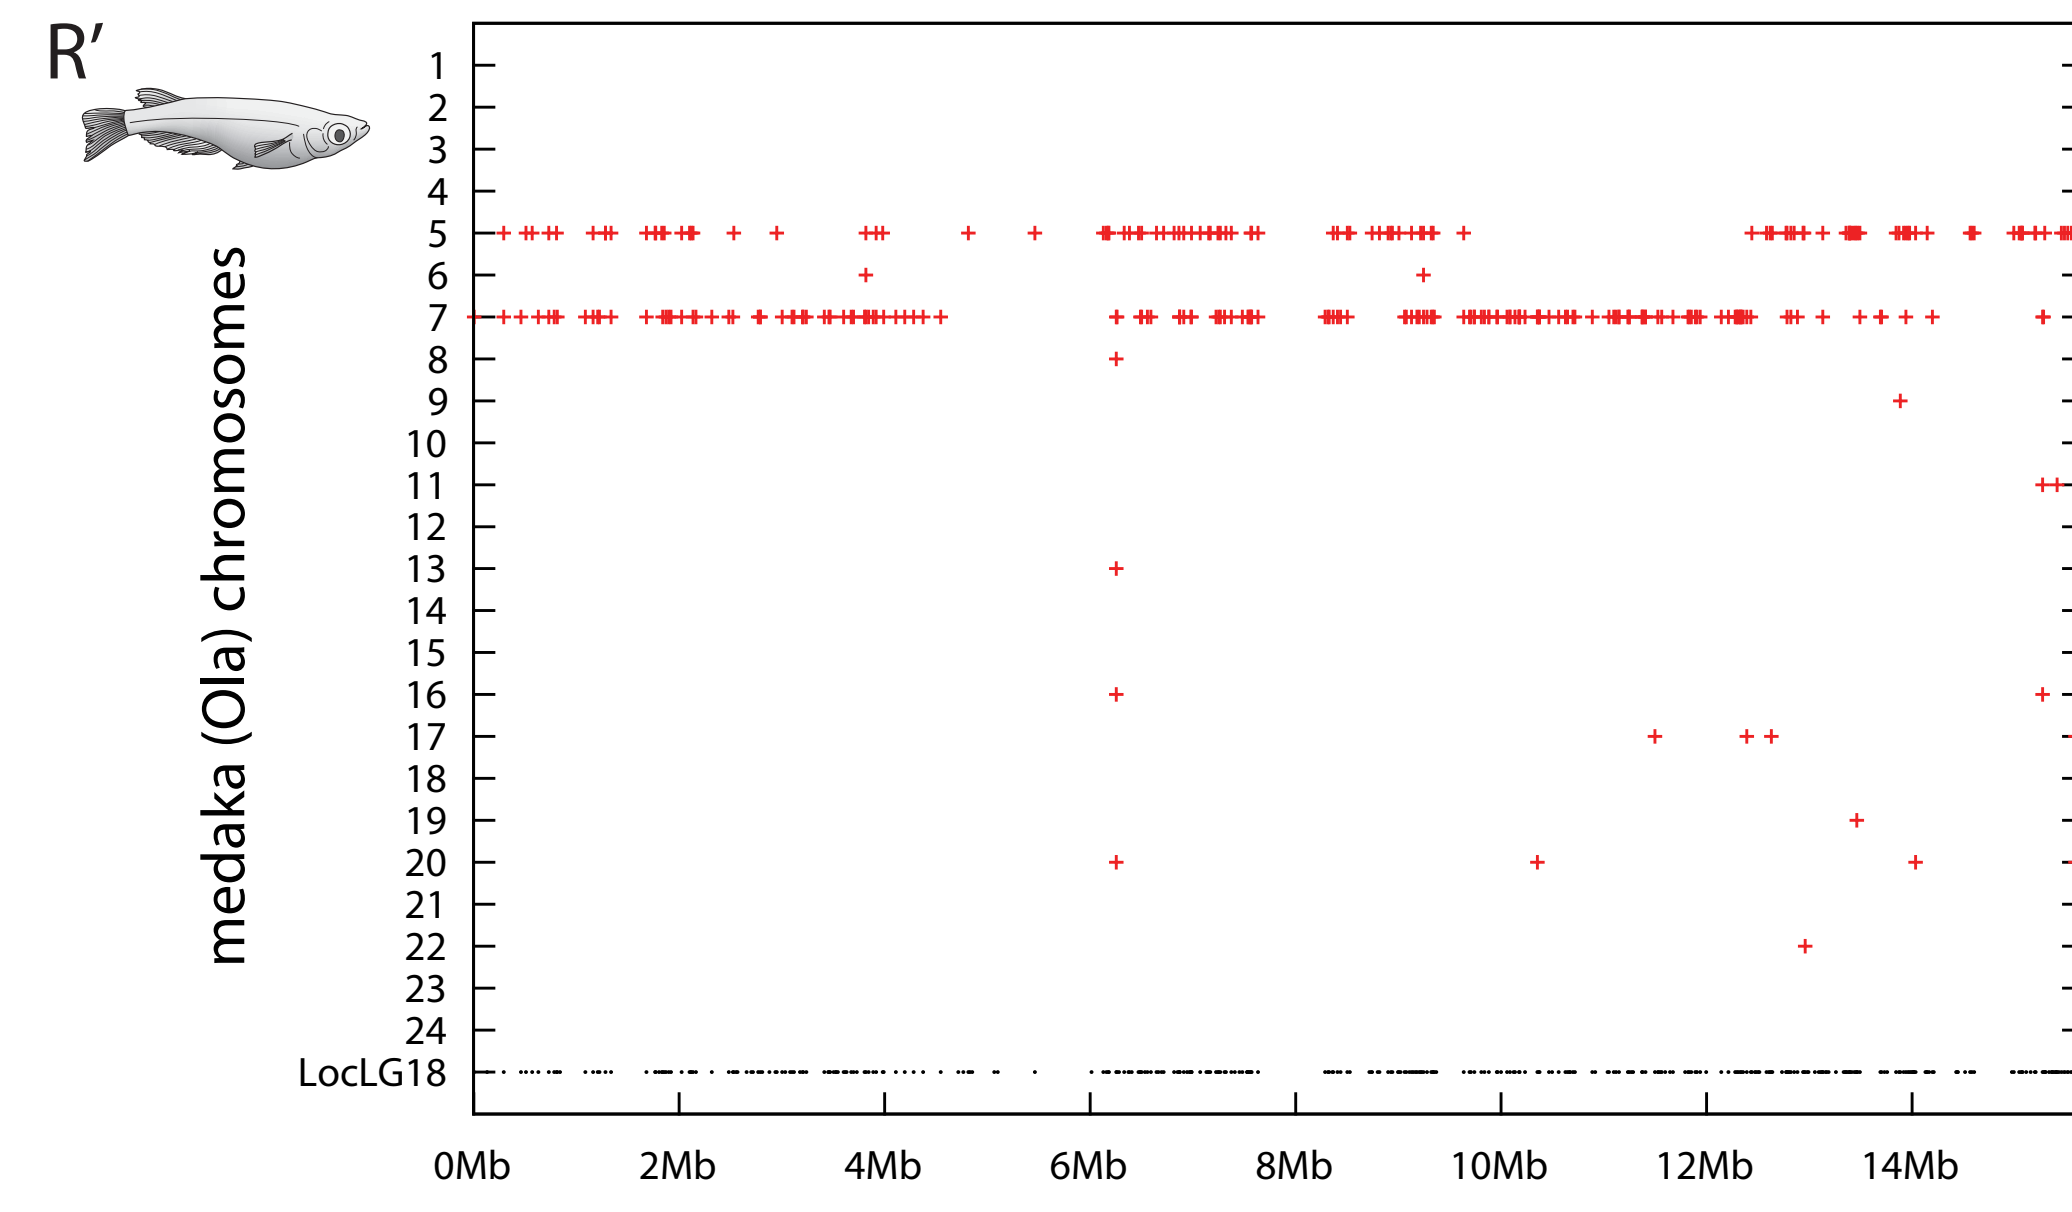

S Spotted Gar Linkage Group 19

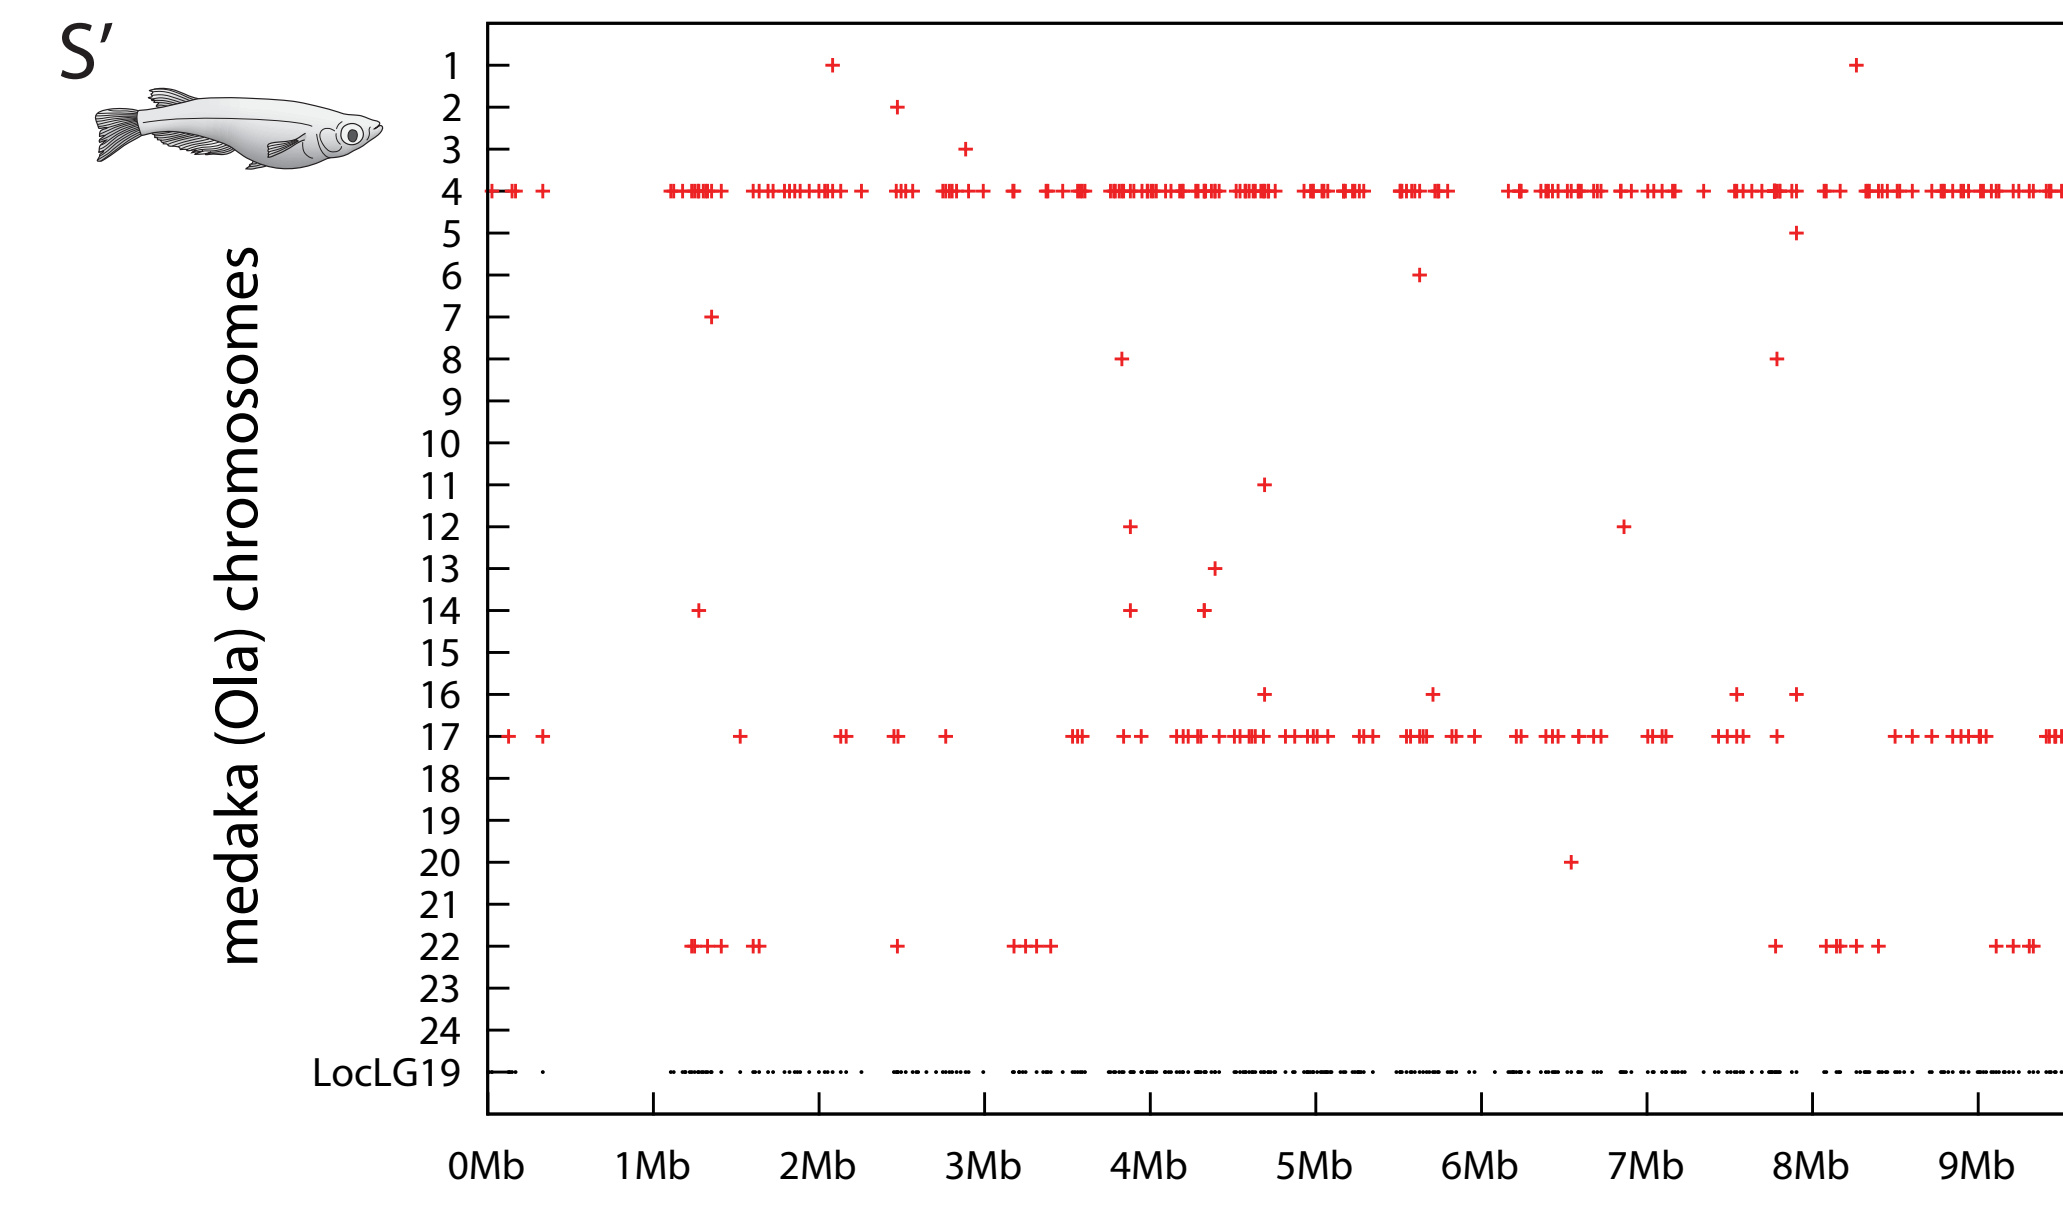

T Spotted Gar Linkage Group 20

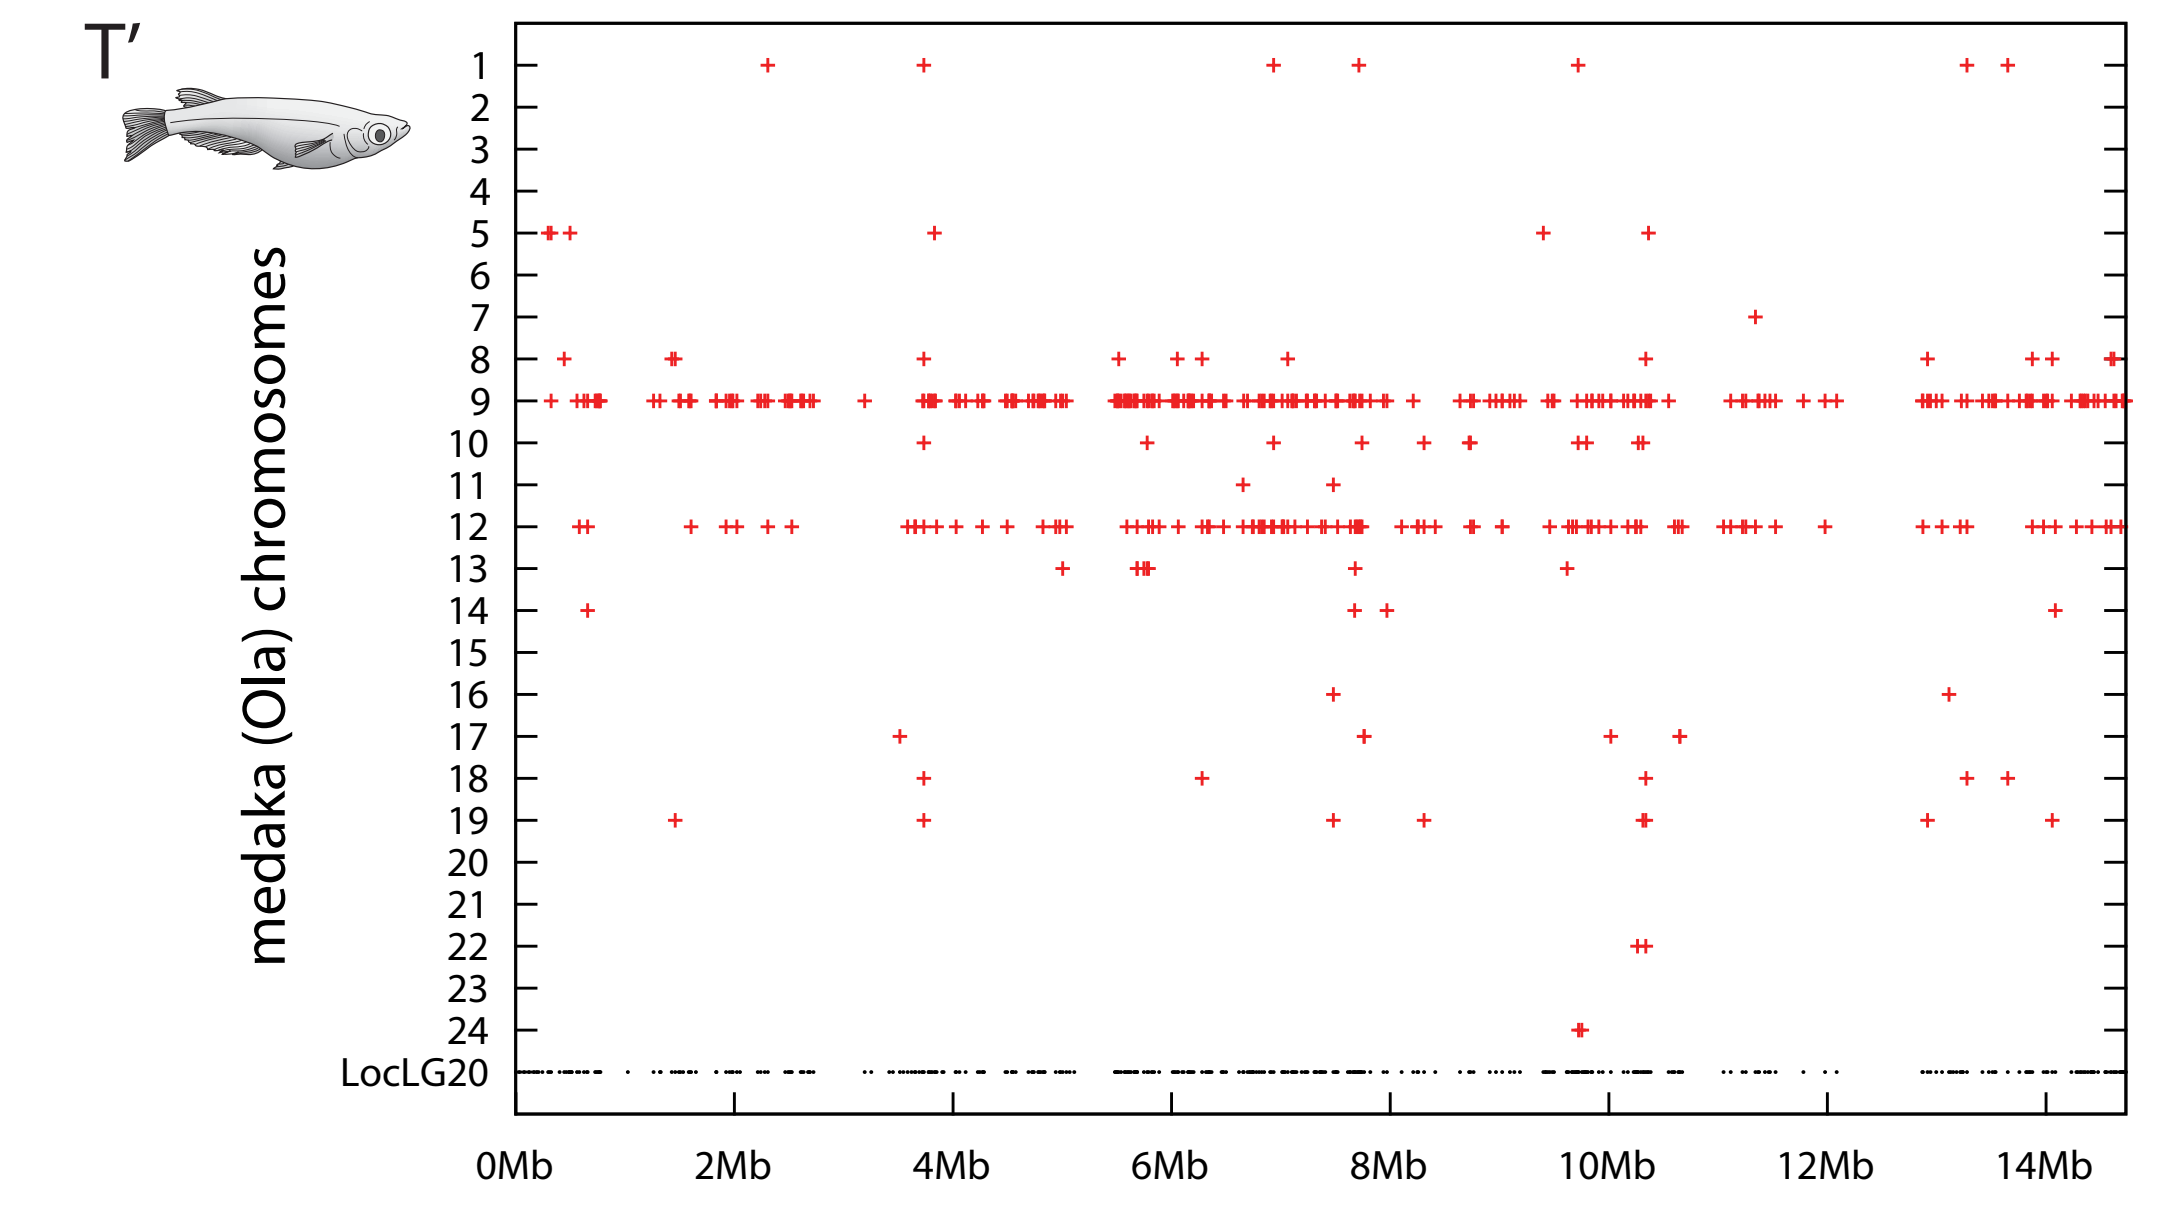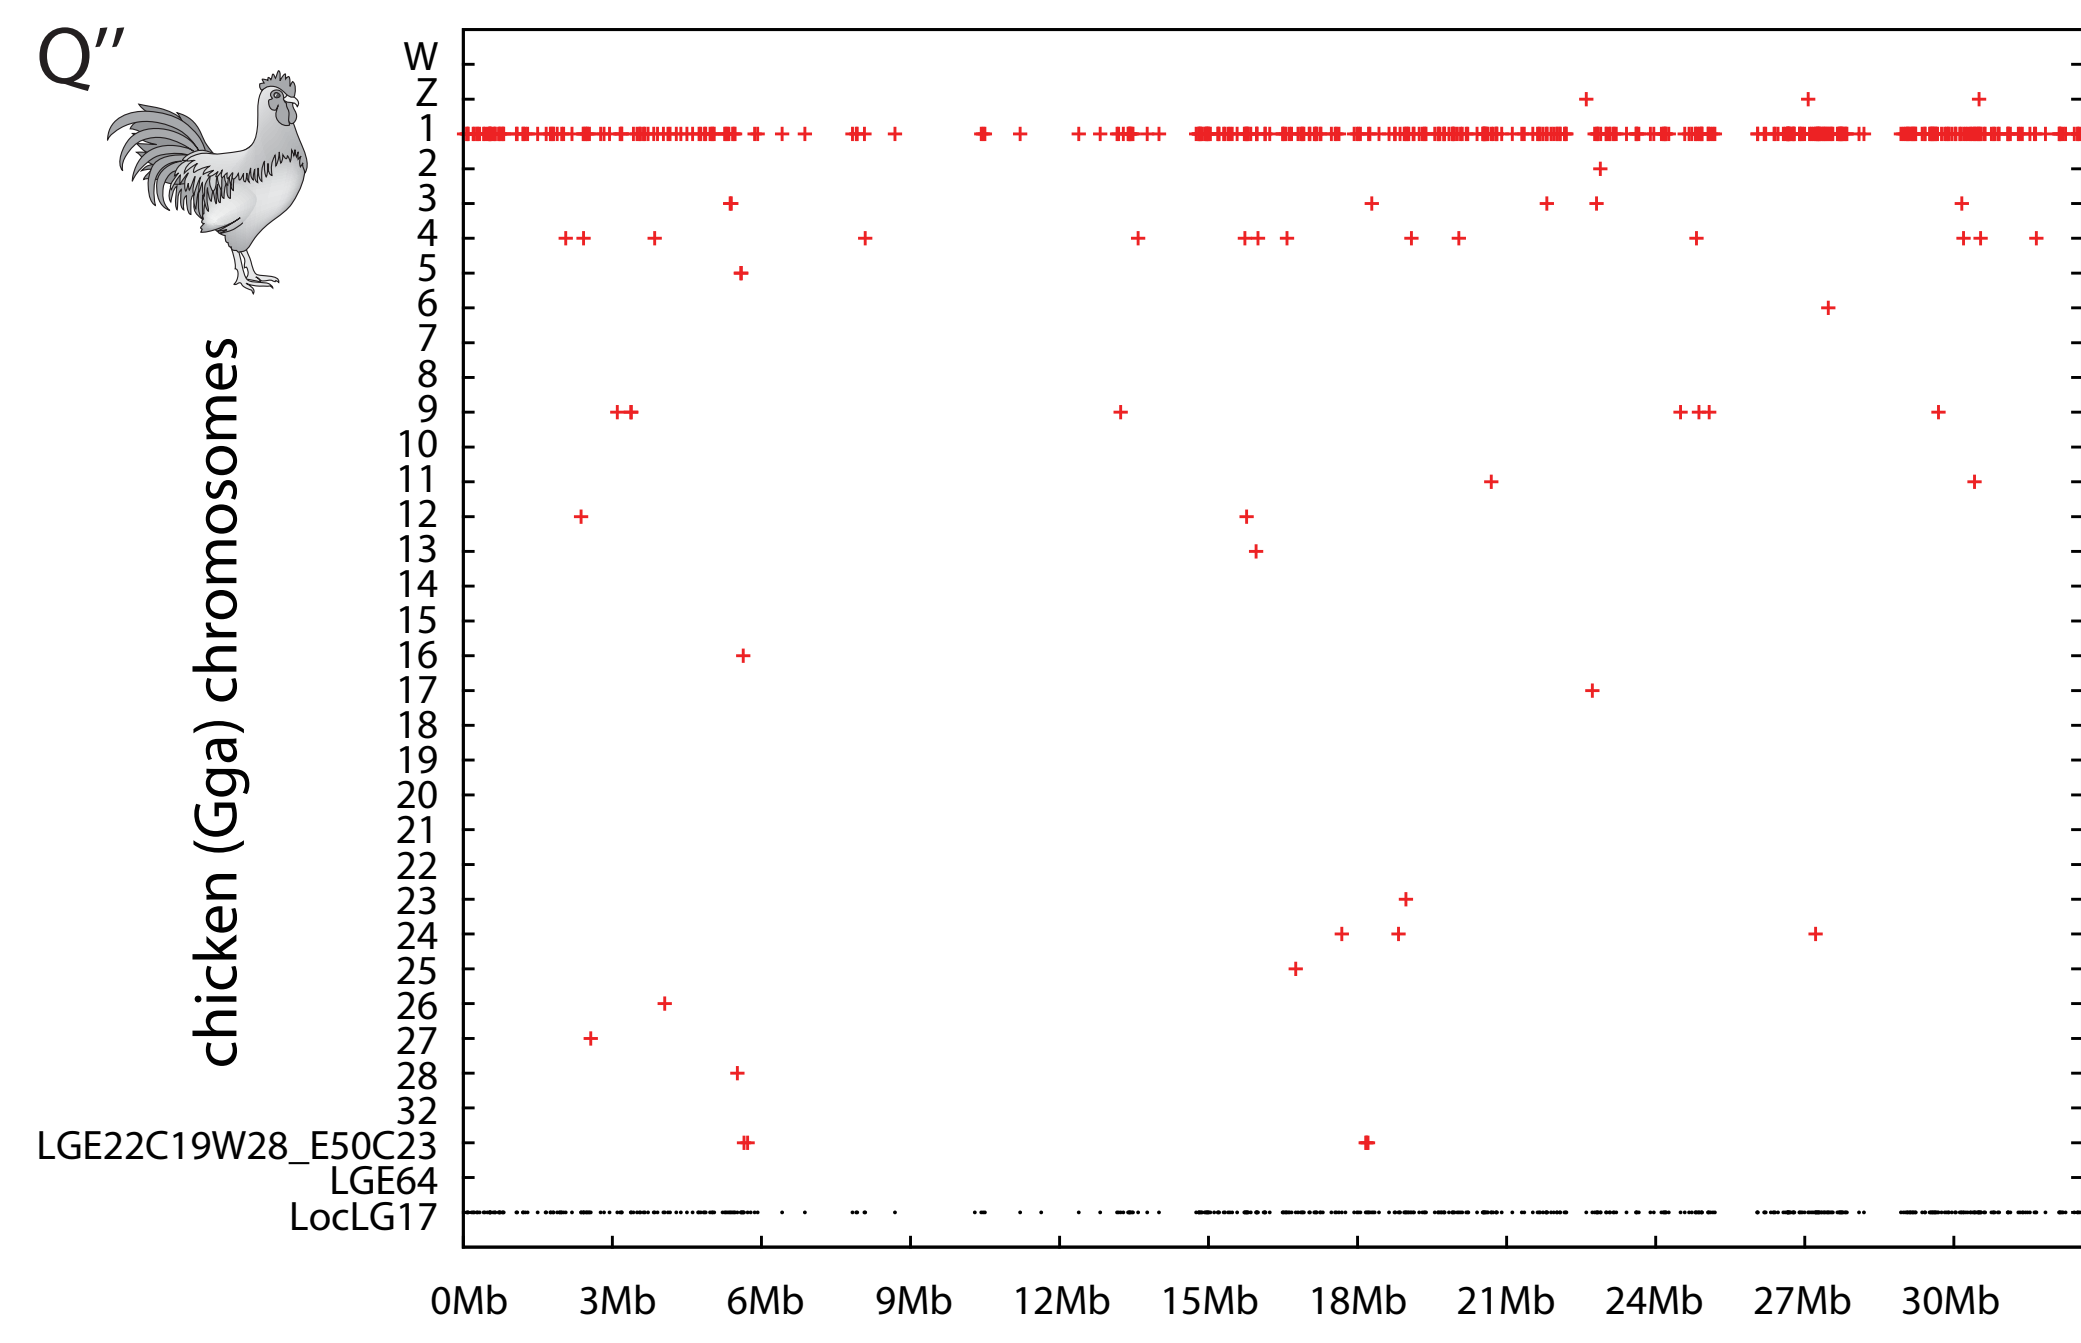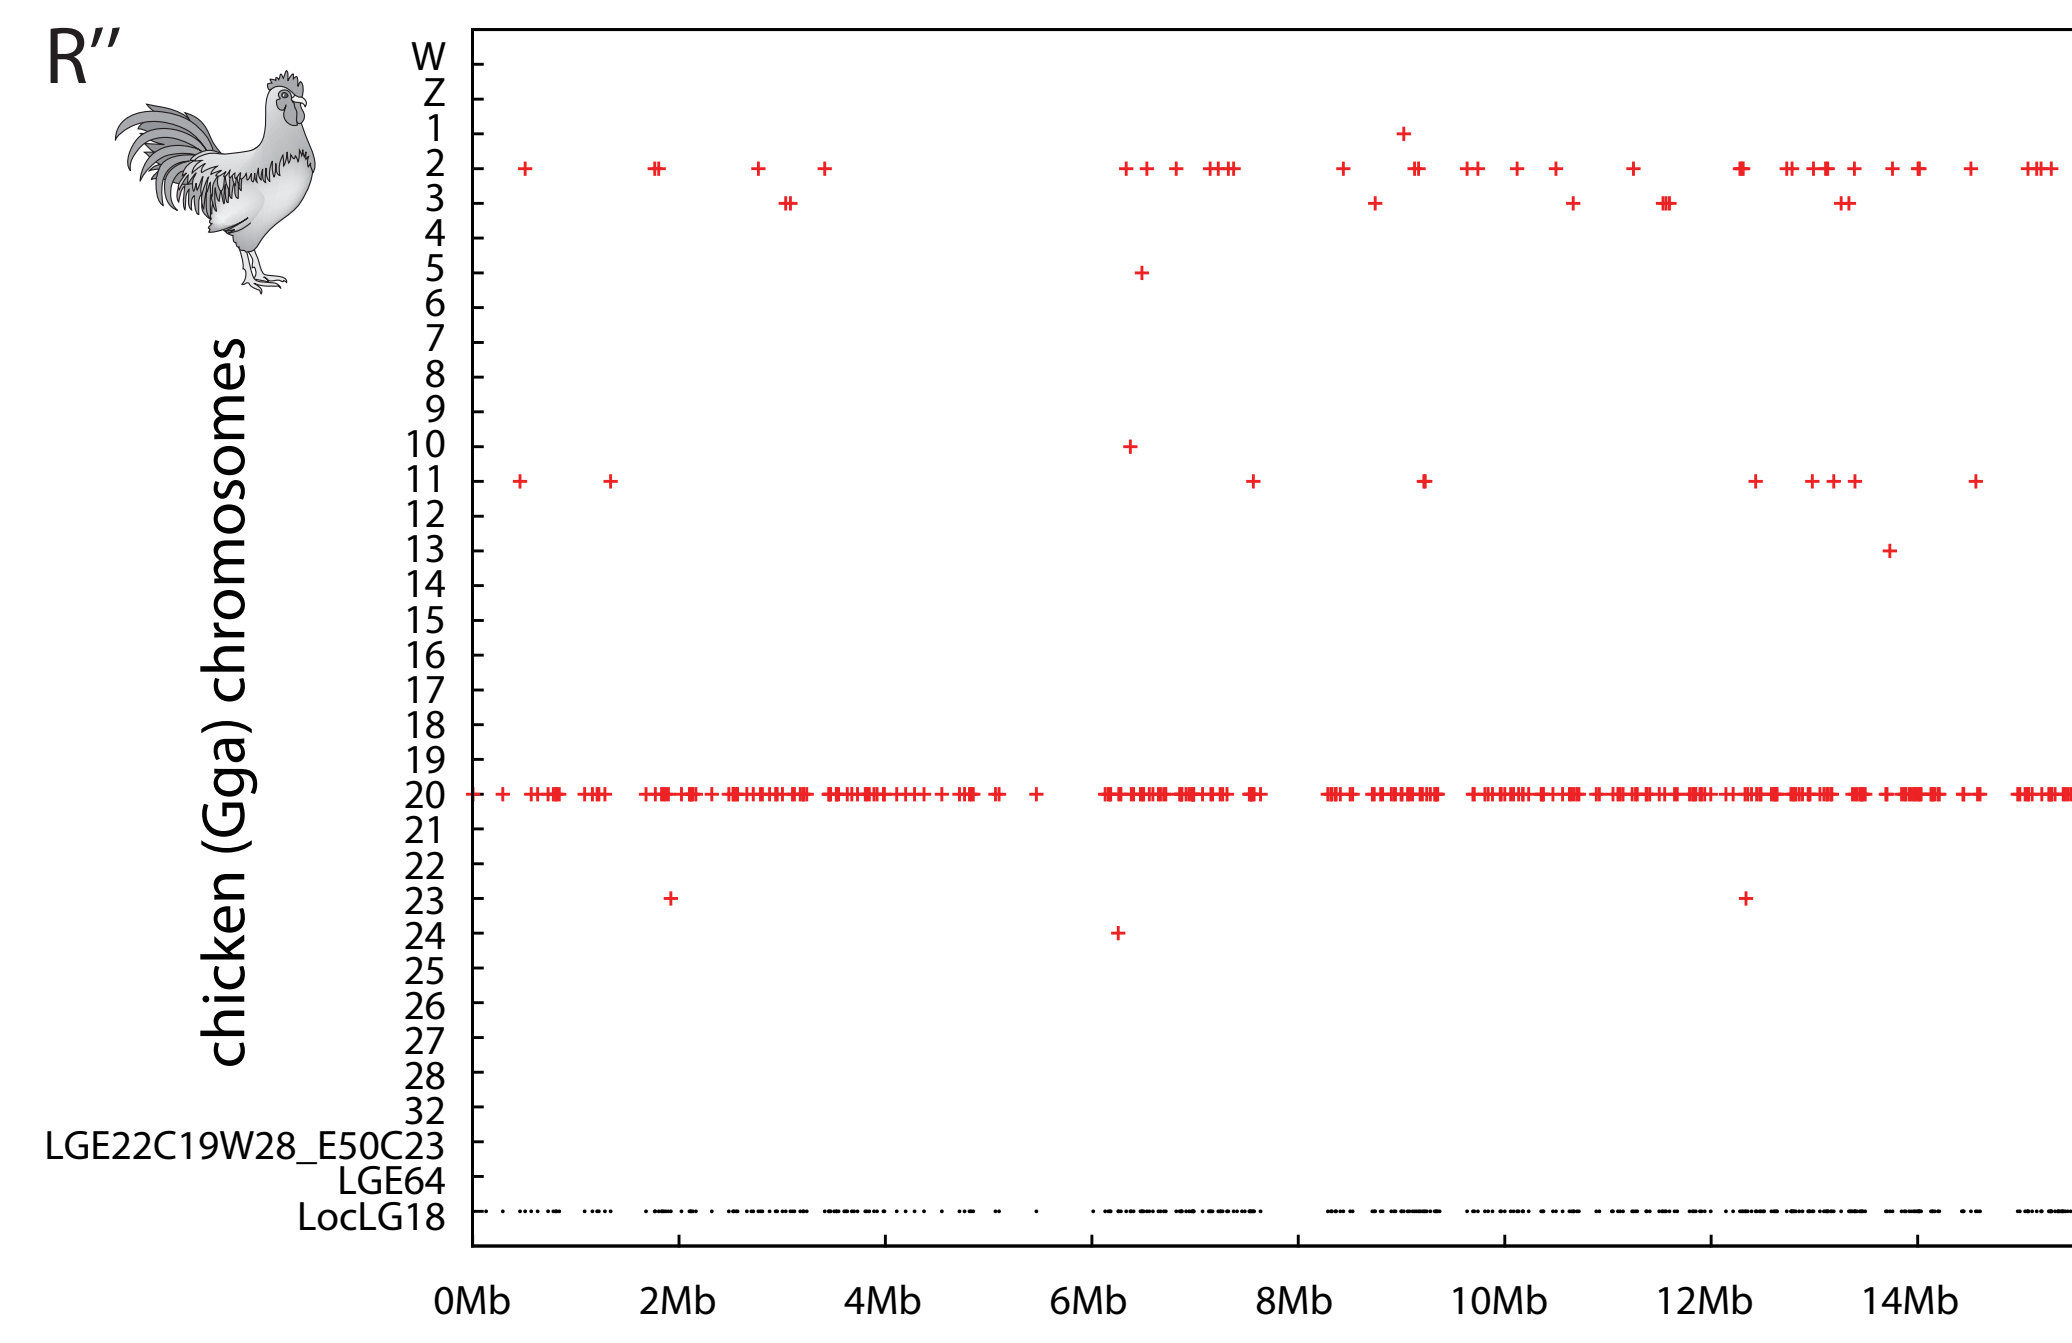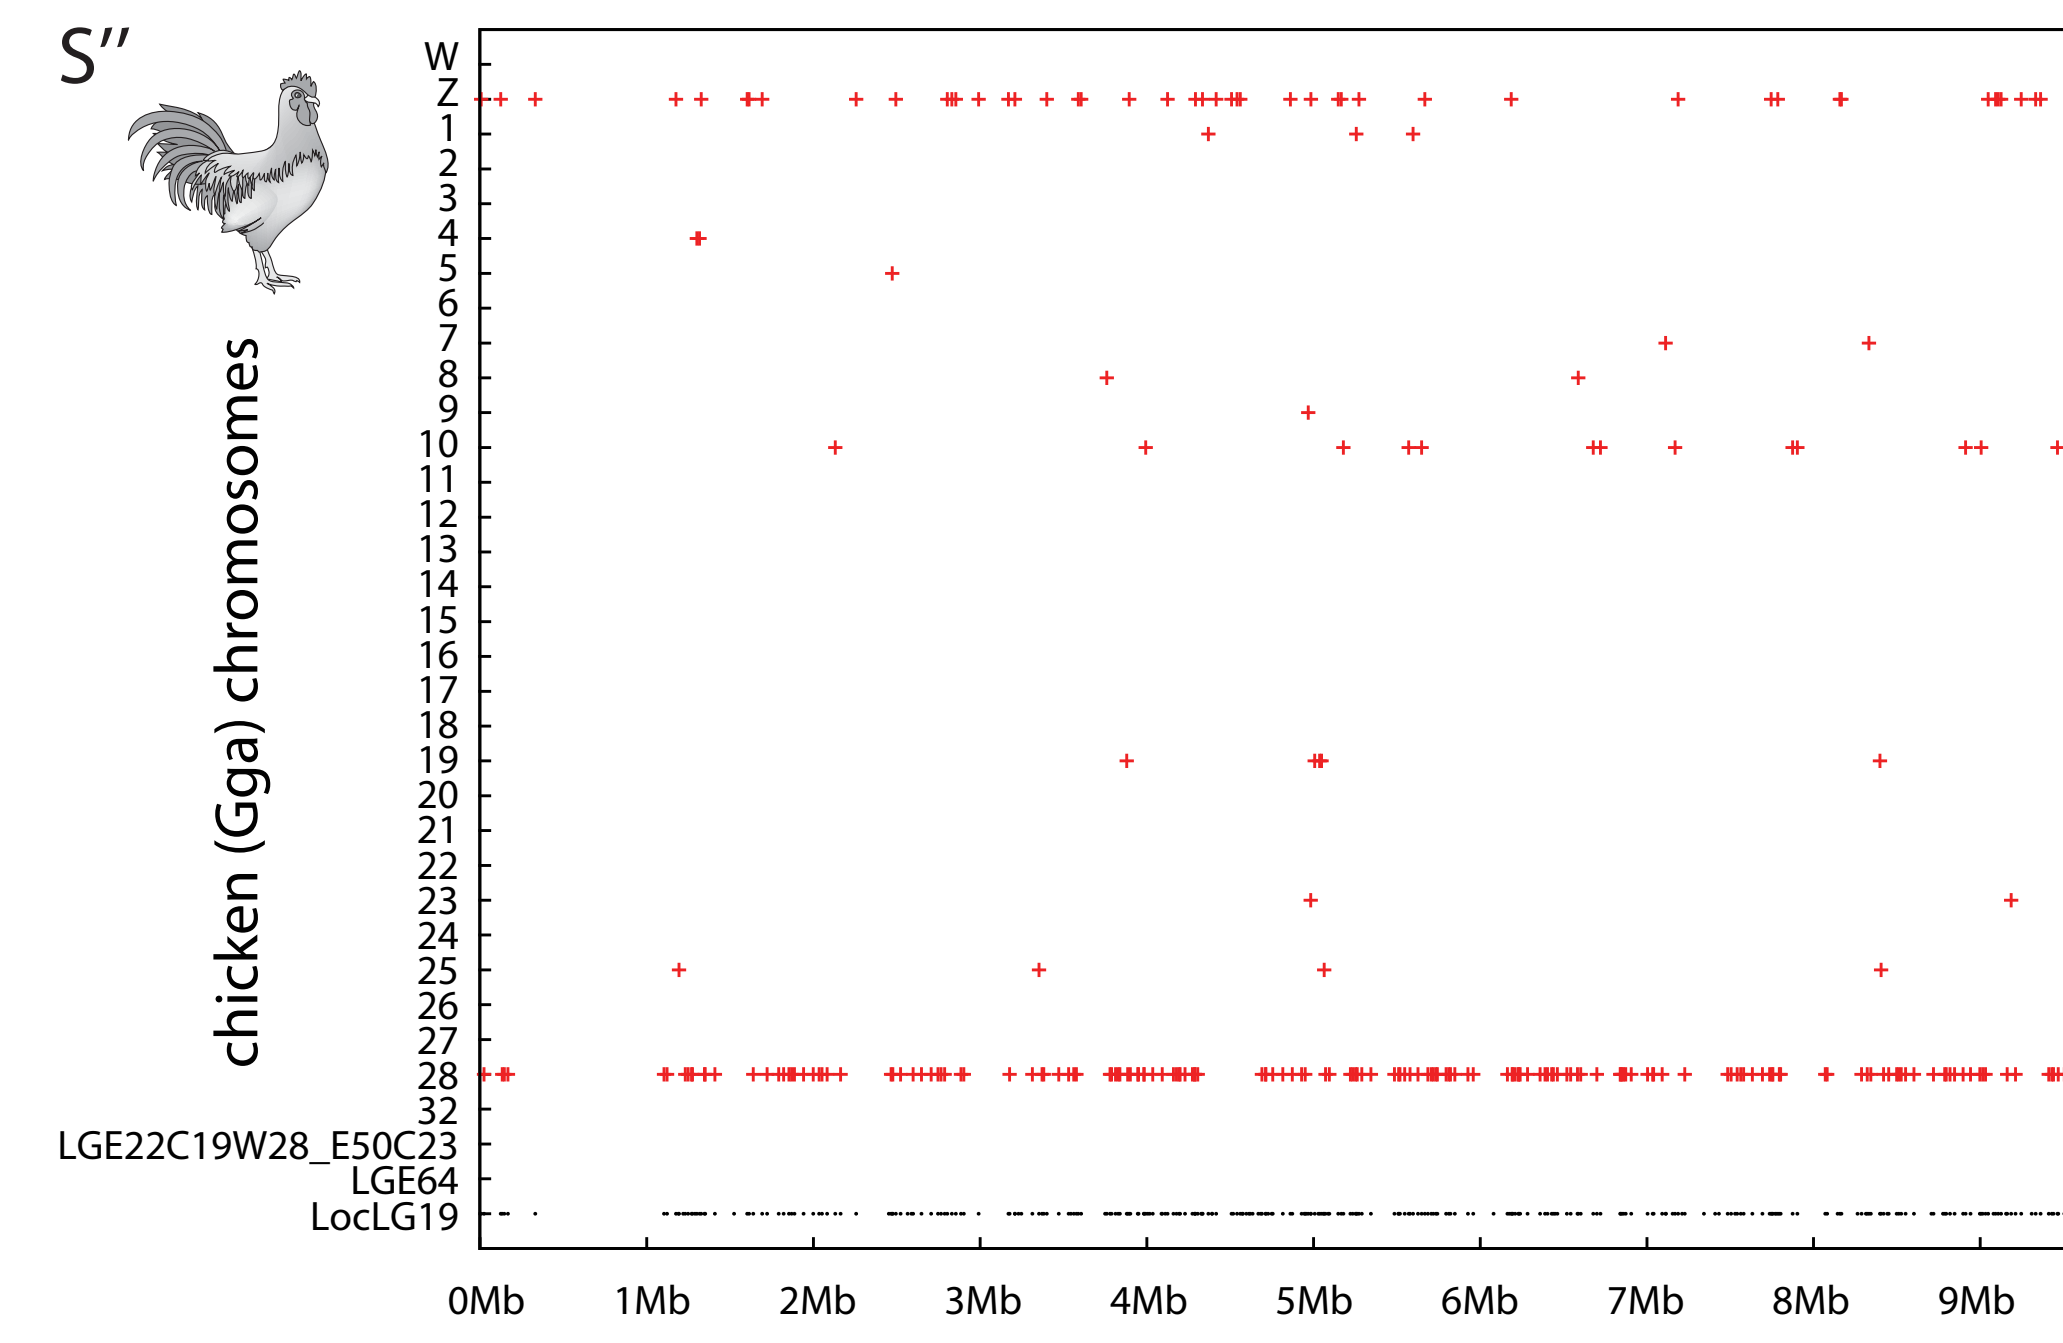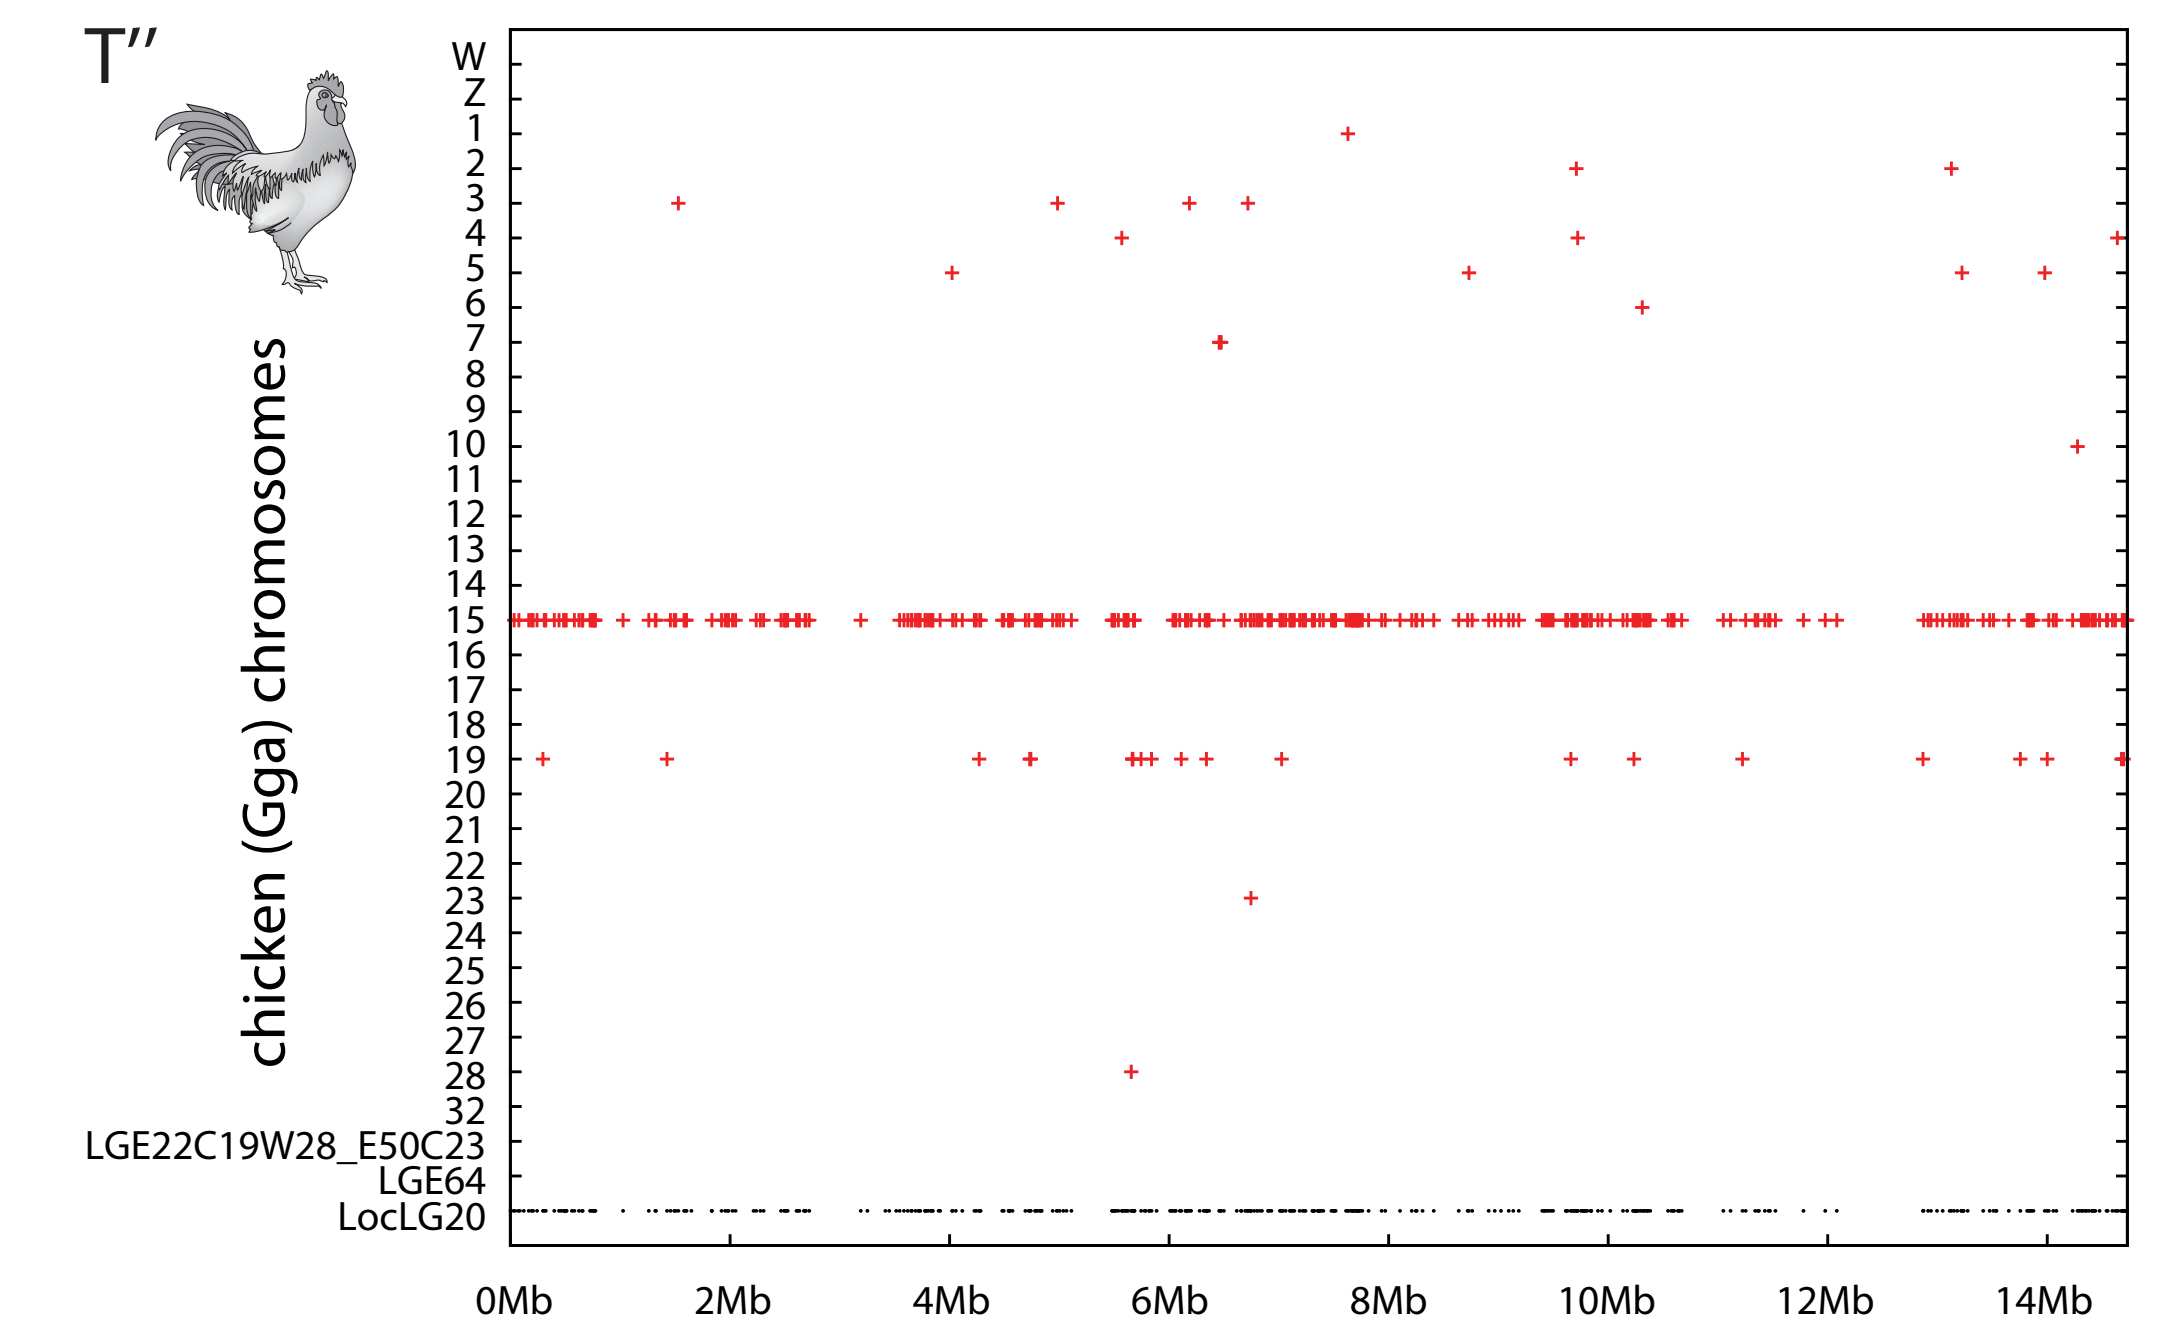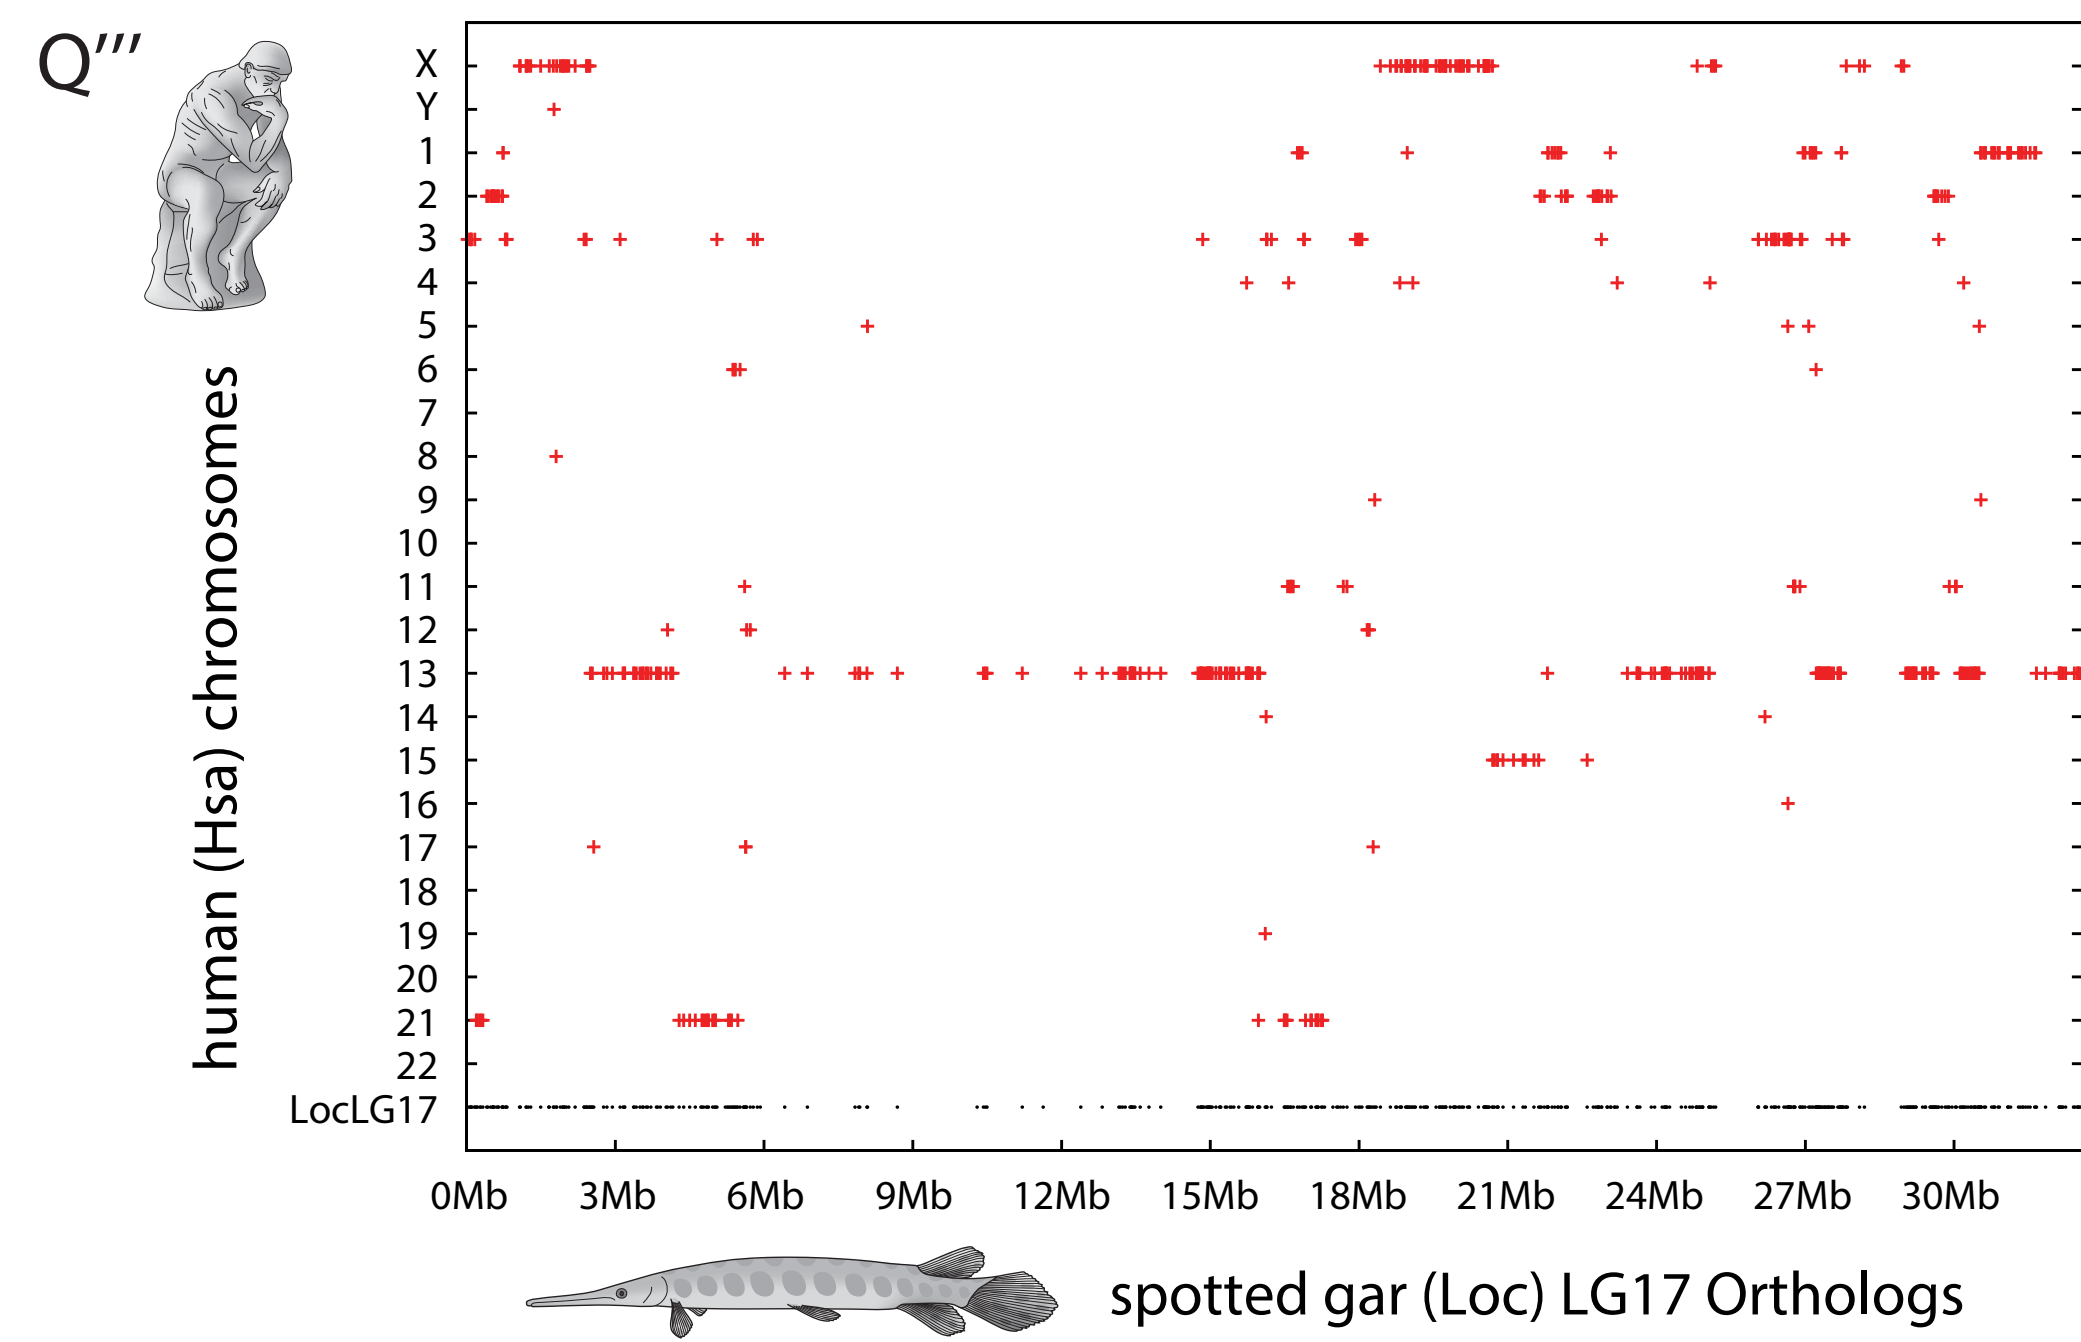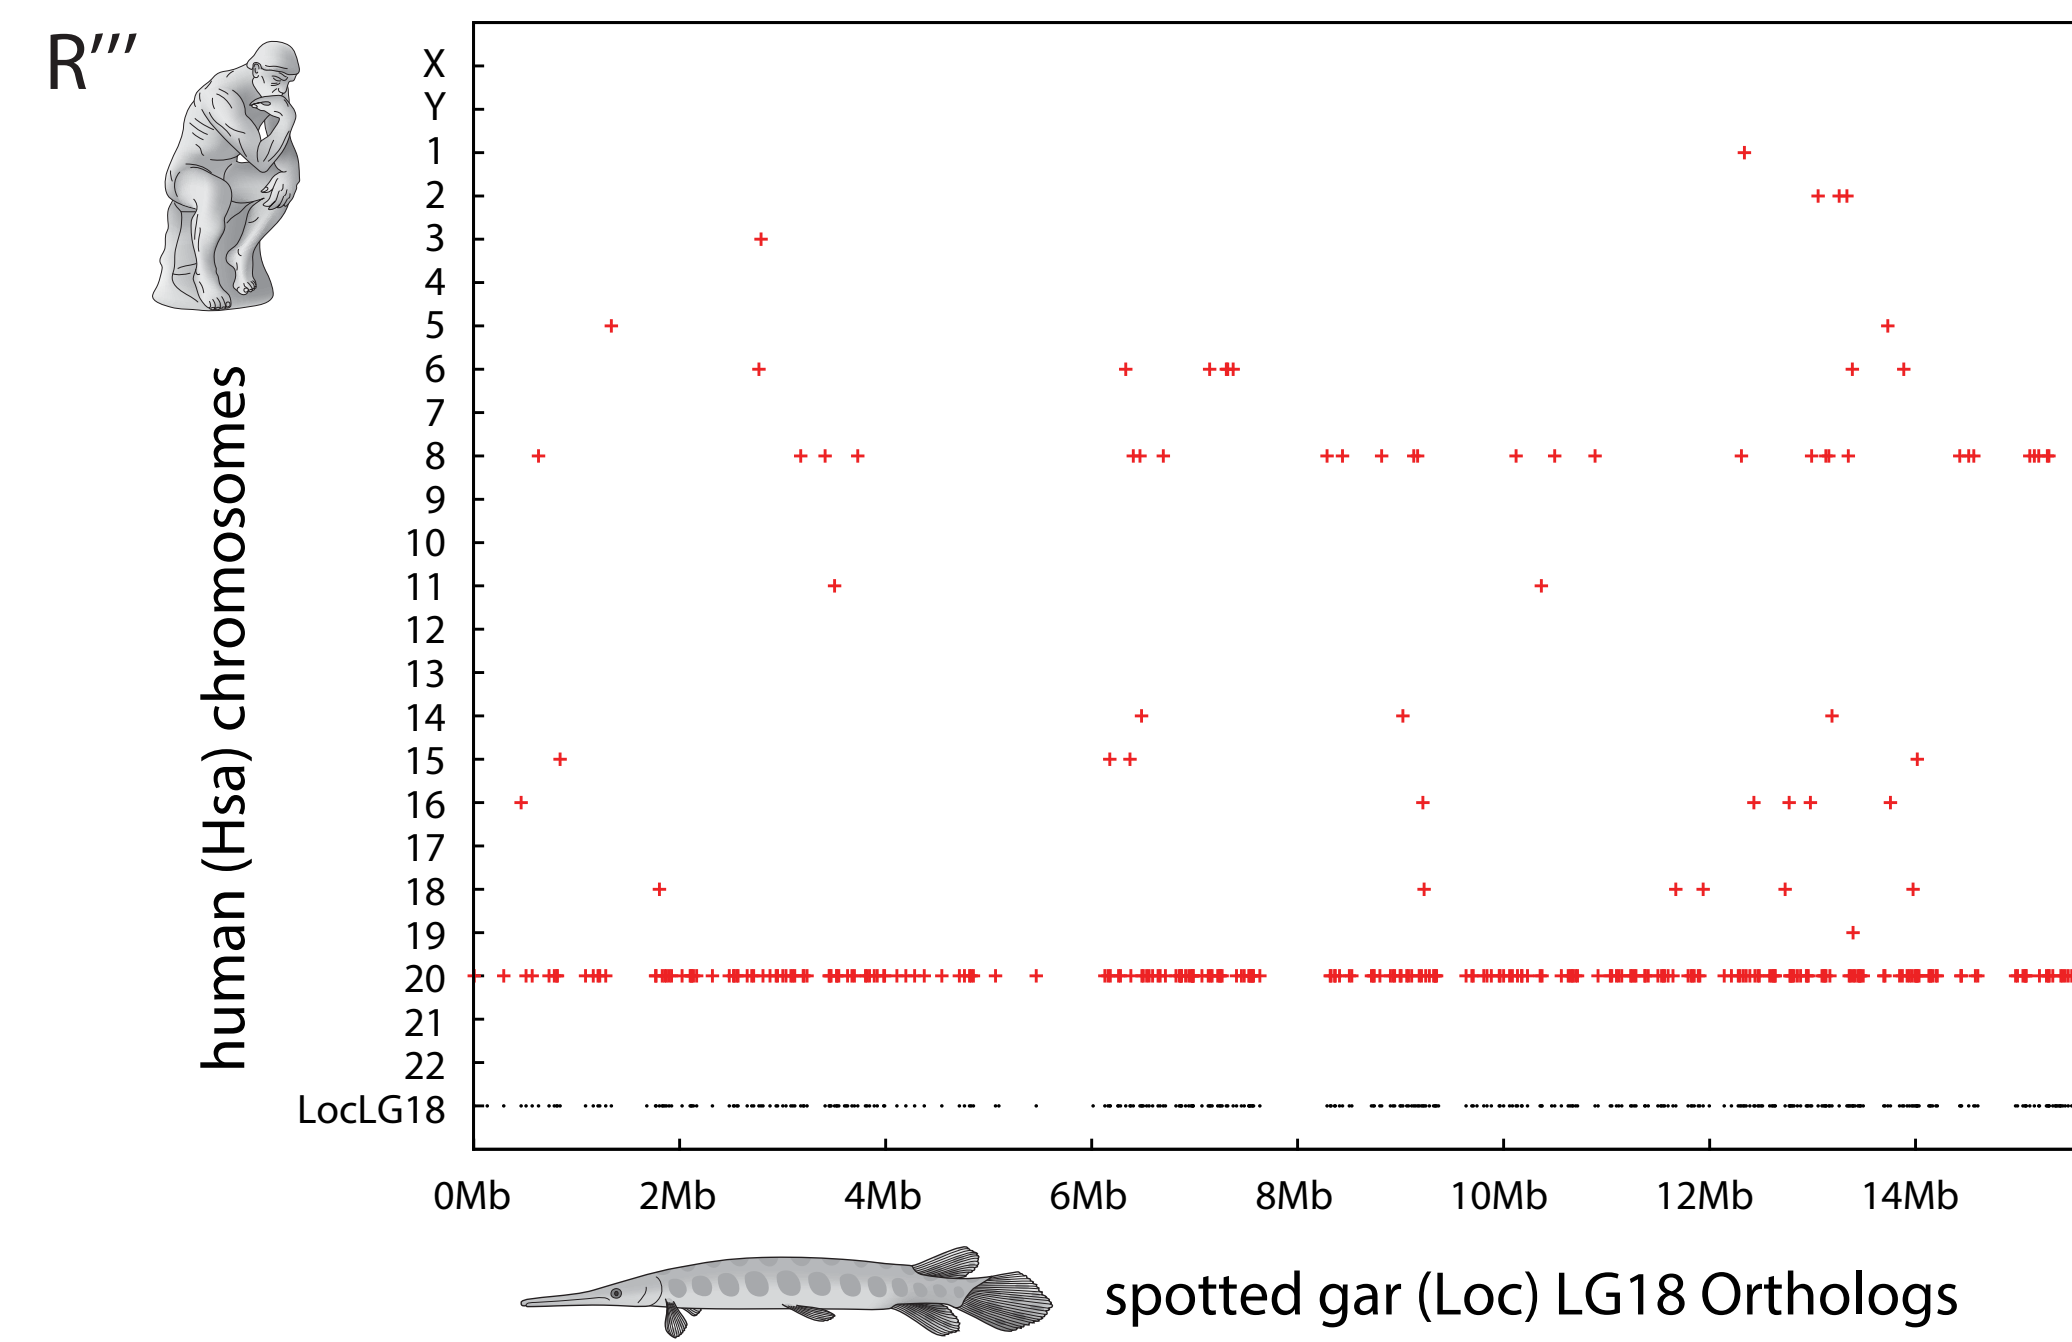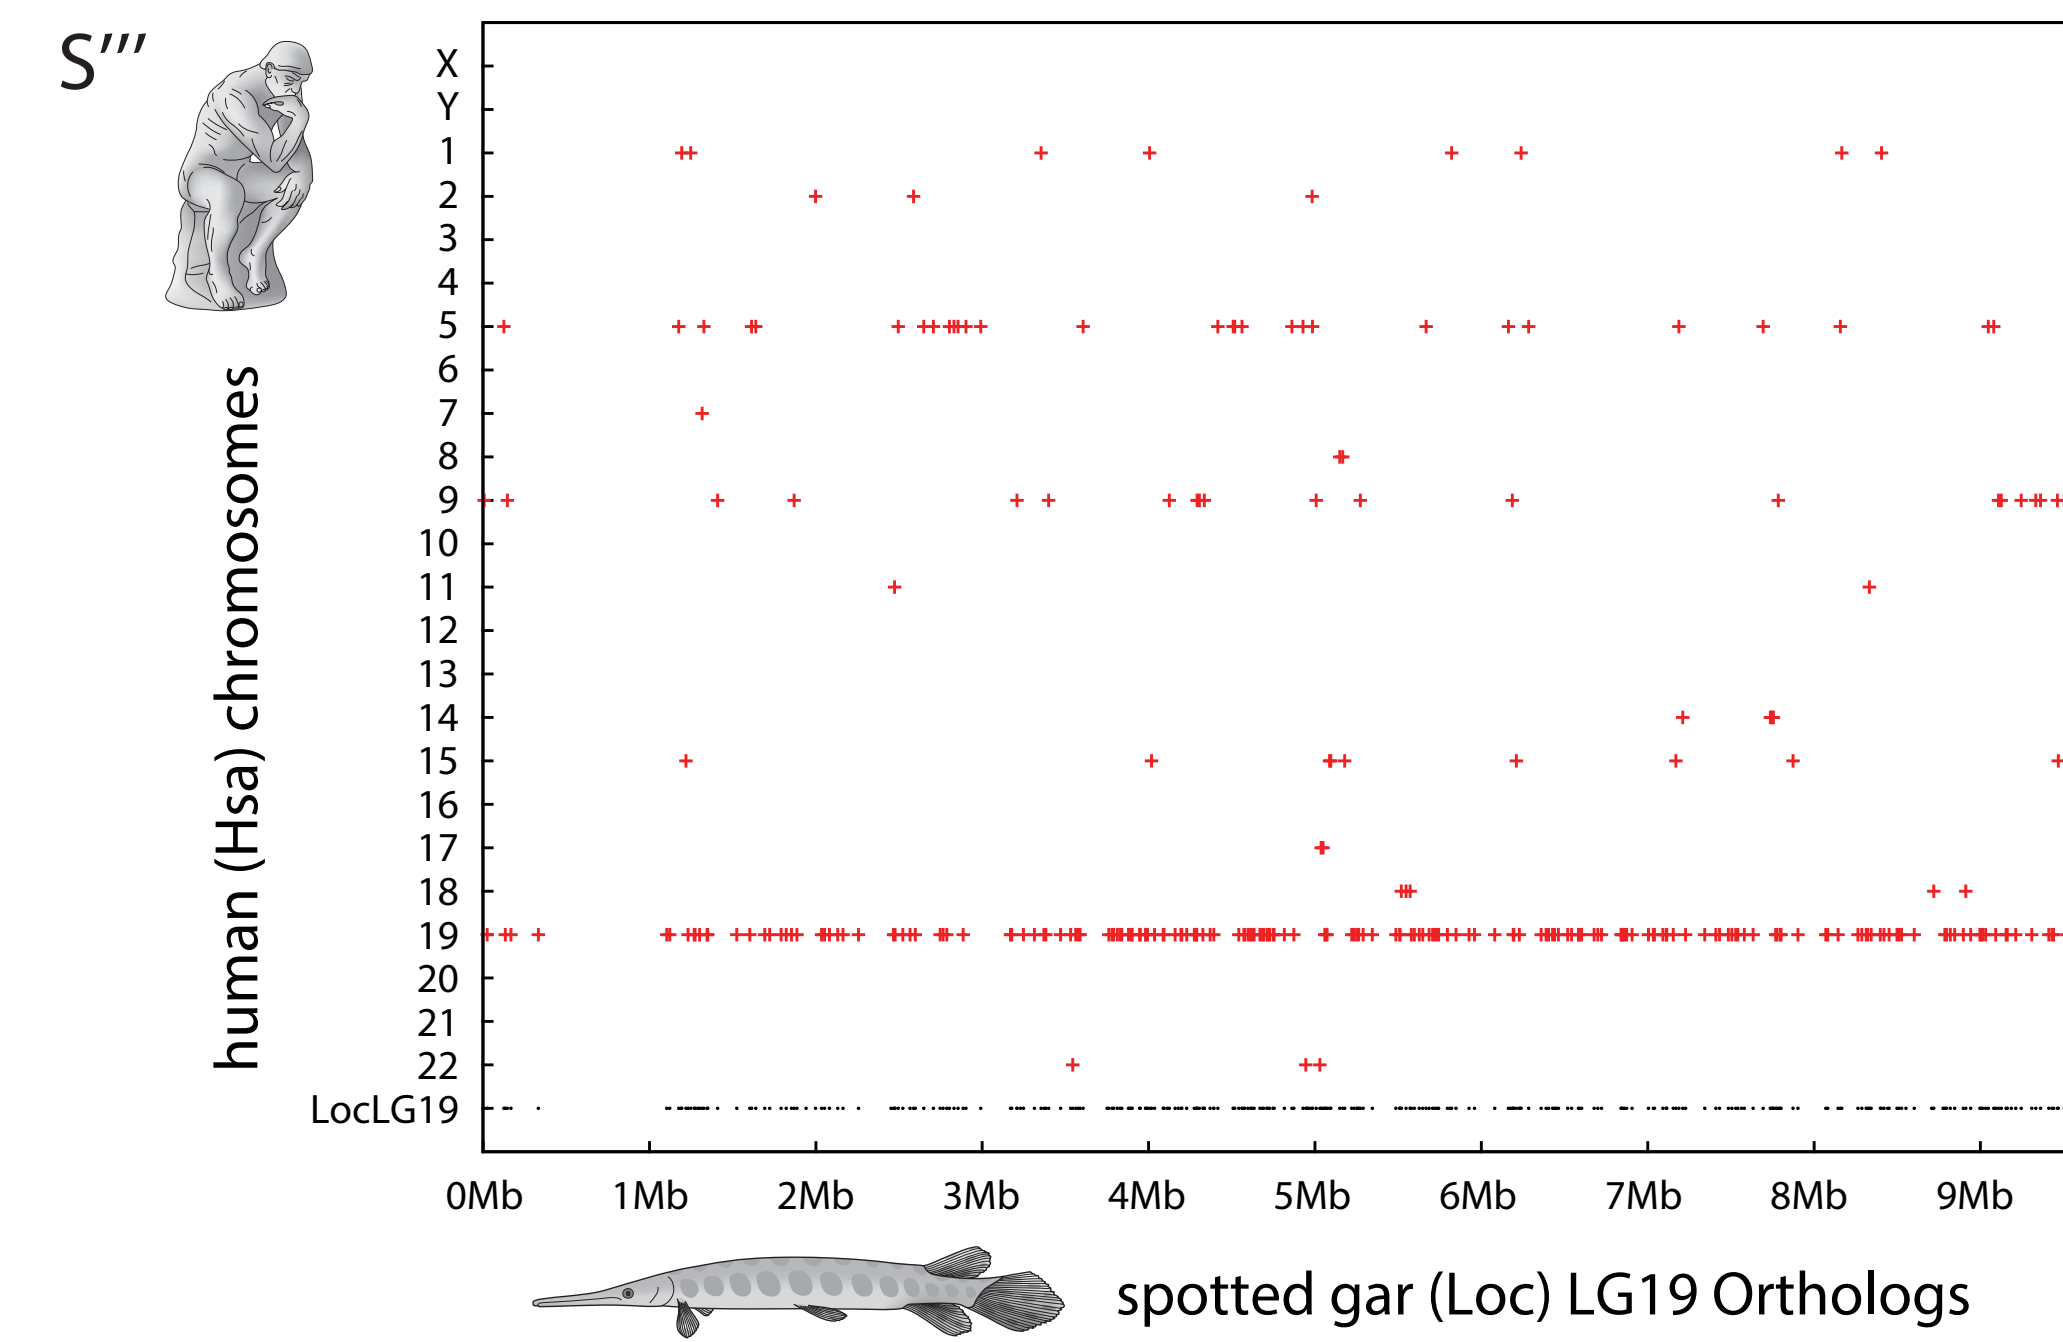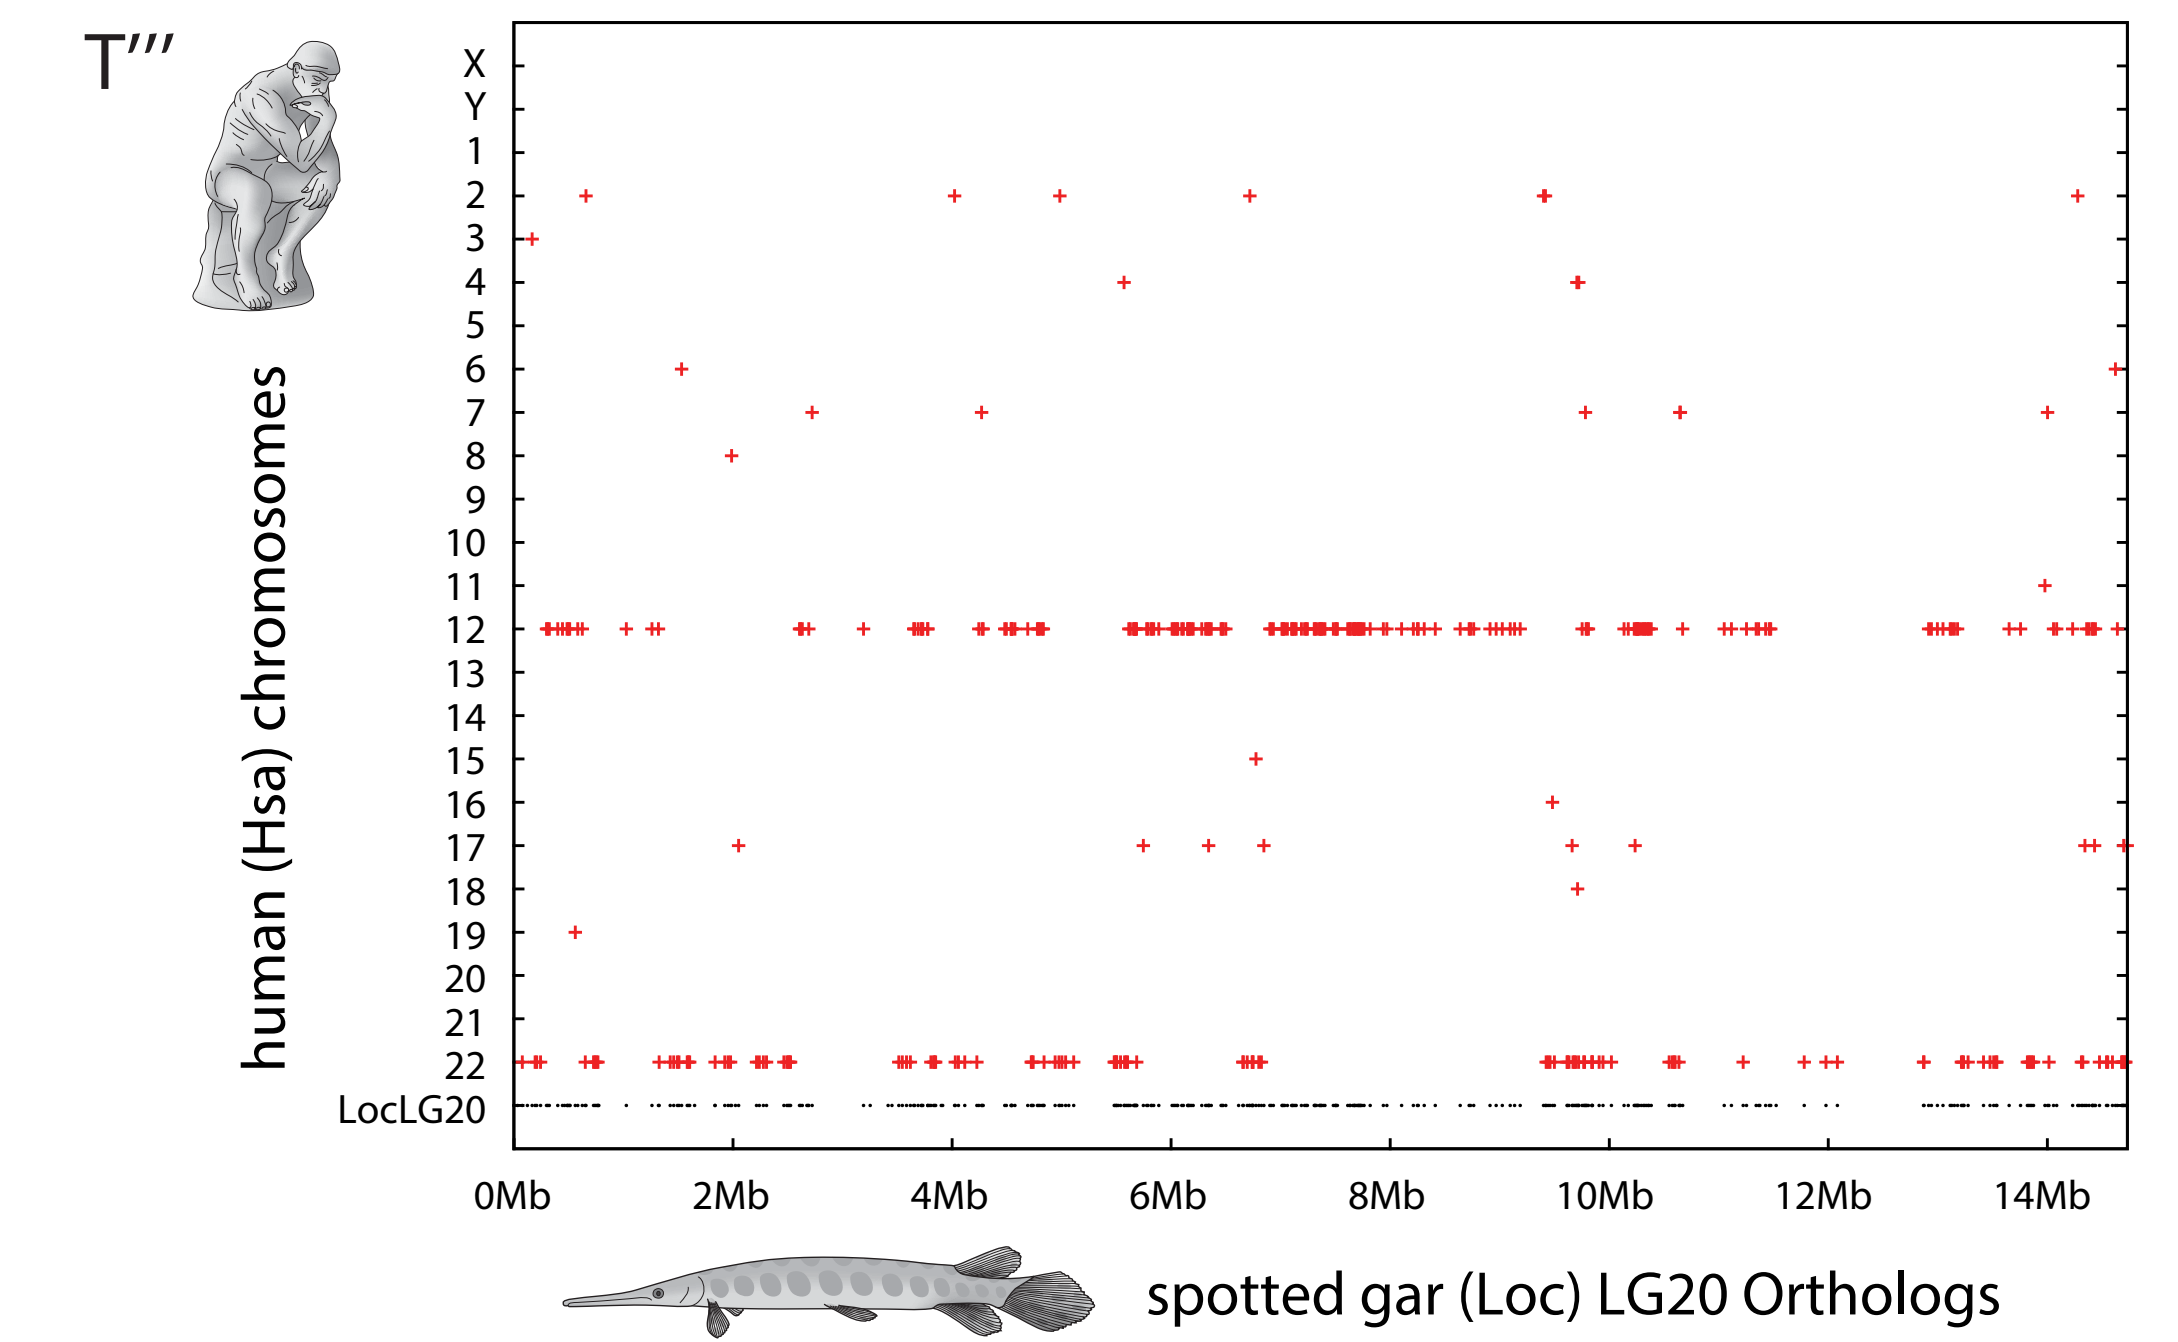

spotted gar (Loc) LG17 Orthologs

spotted gar (Loc) LG18 Orthologs

spotted gar (Loc) LG19 Orthologs

spotted gar (Loc) LG20 Orthologs

U Spotted Gar Linkage Group 21

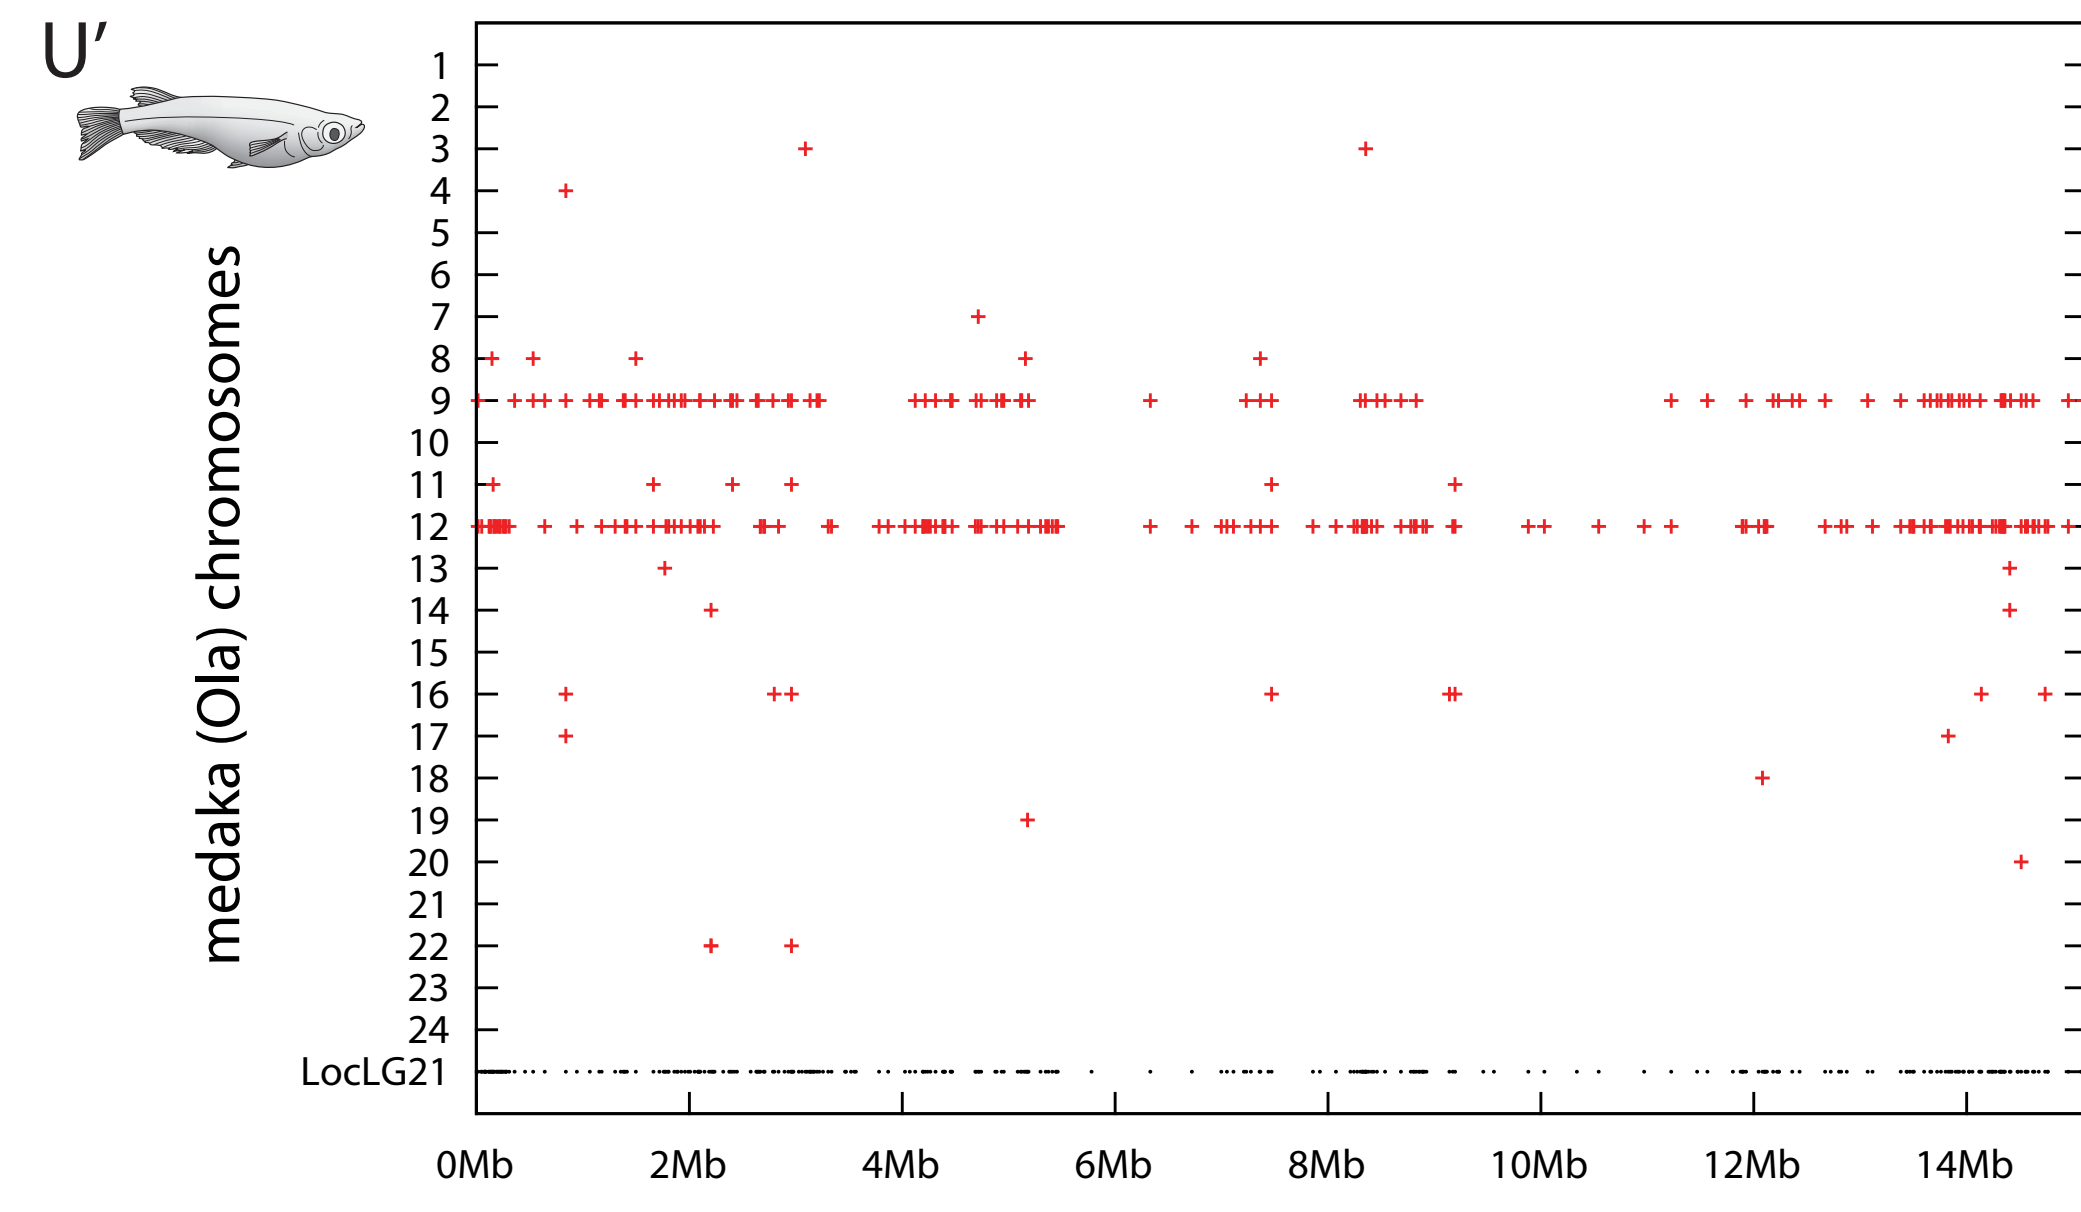

V Spotted Gar Linkage Group 22

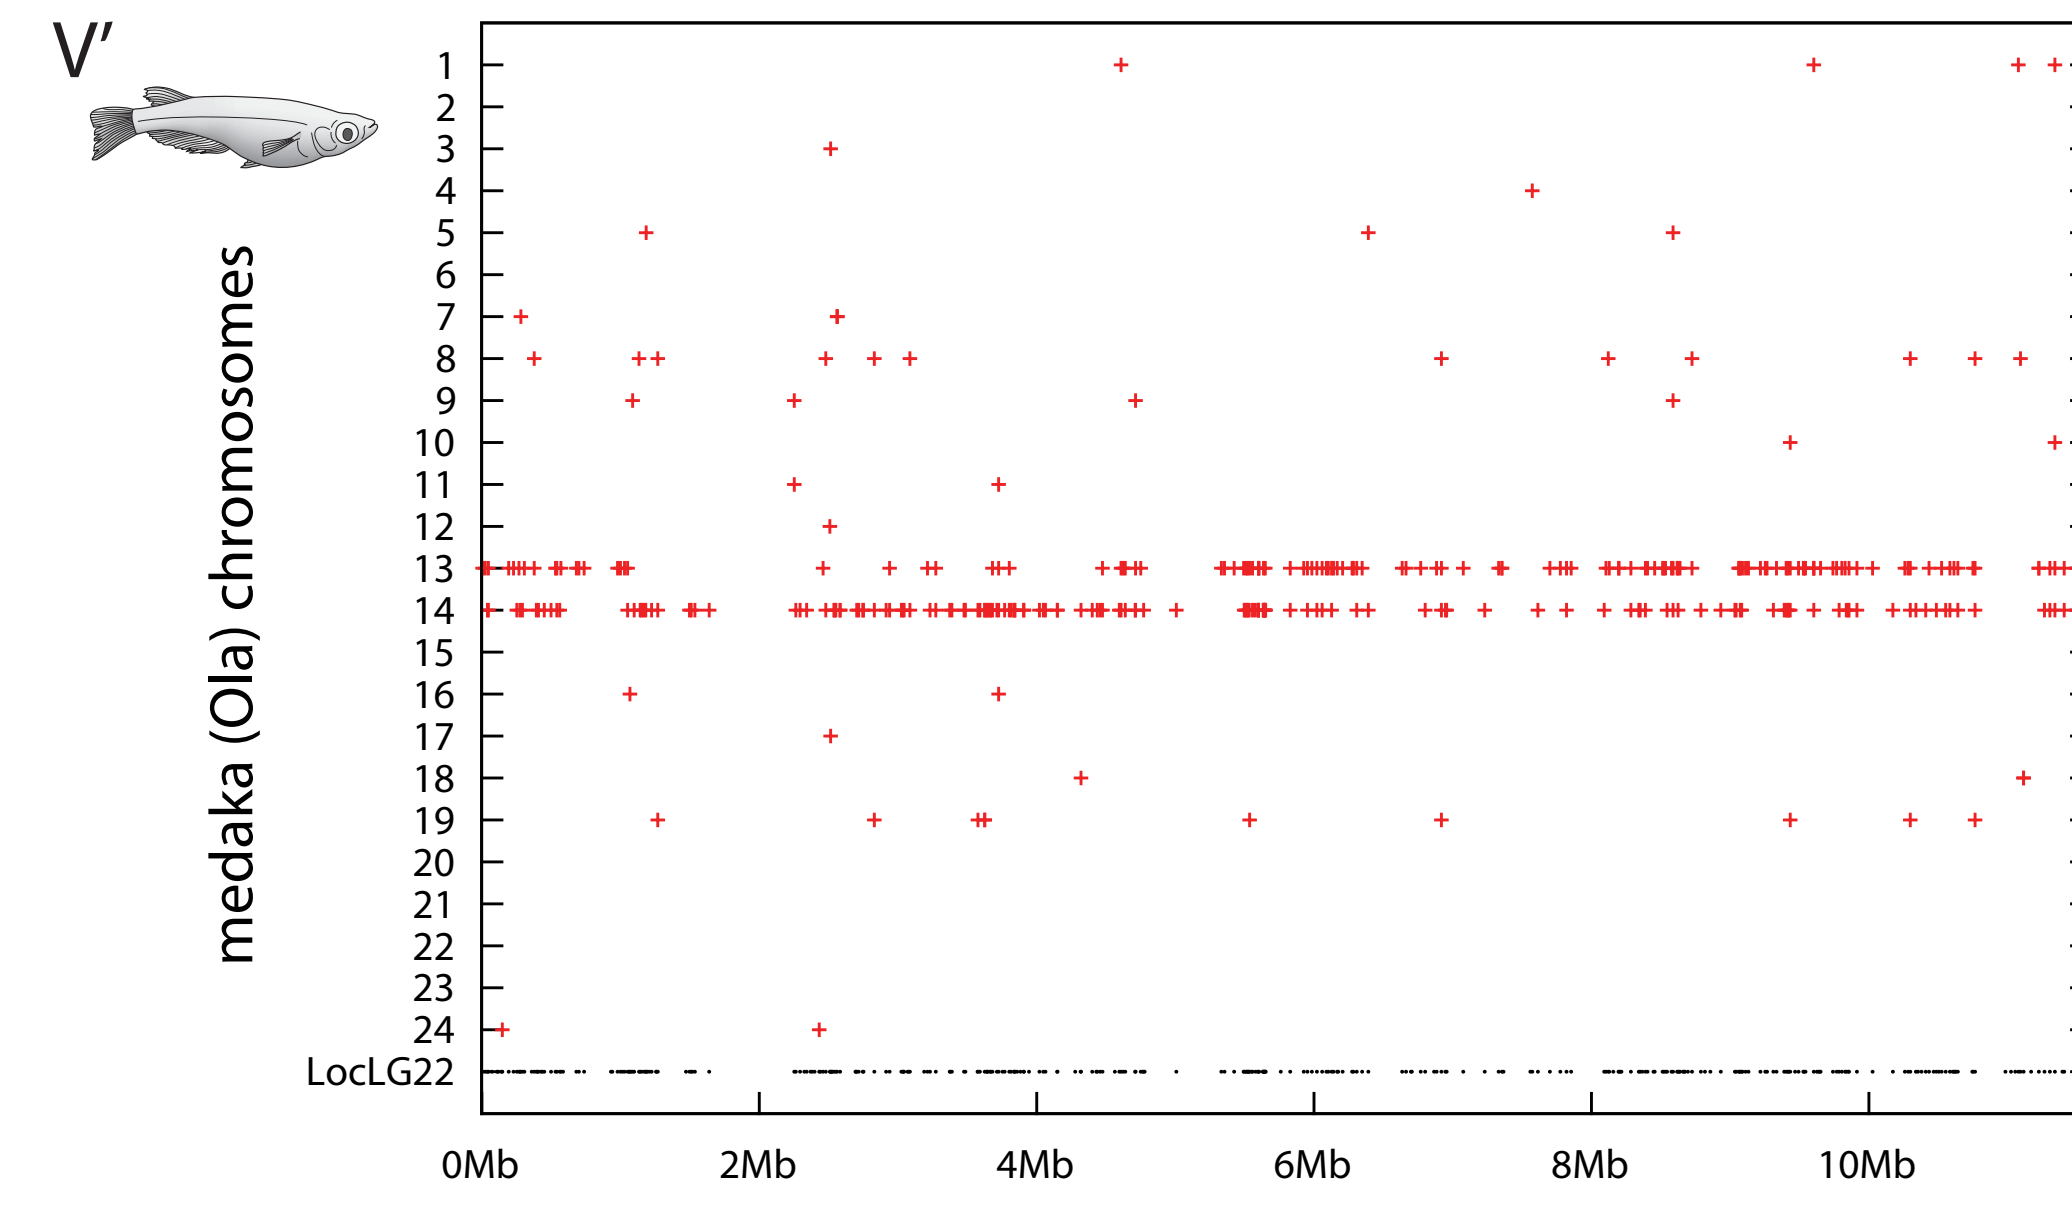

W Spotted Gar Linkage Group 23

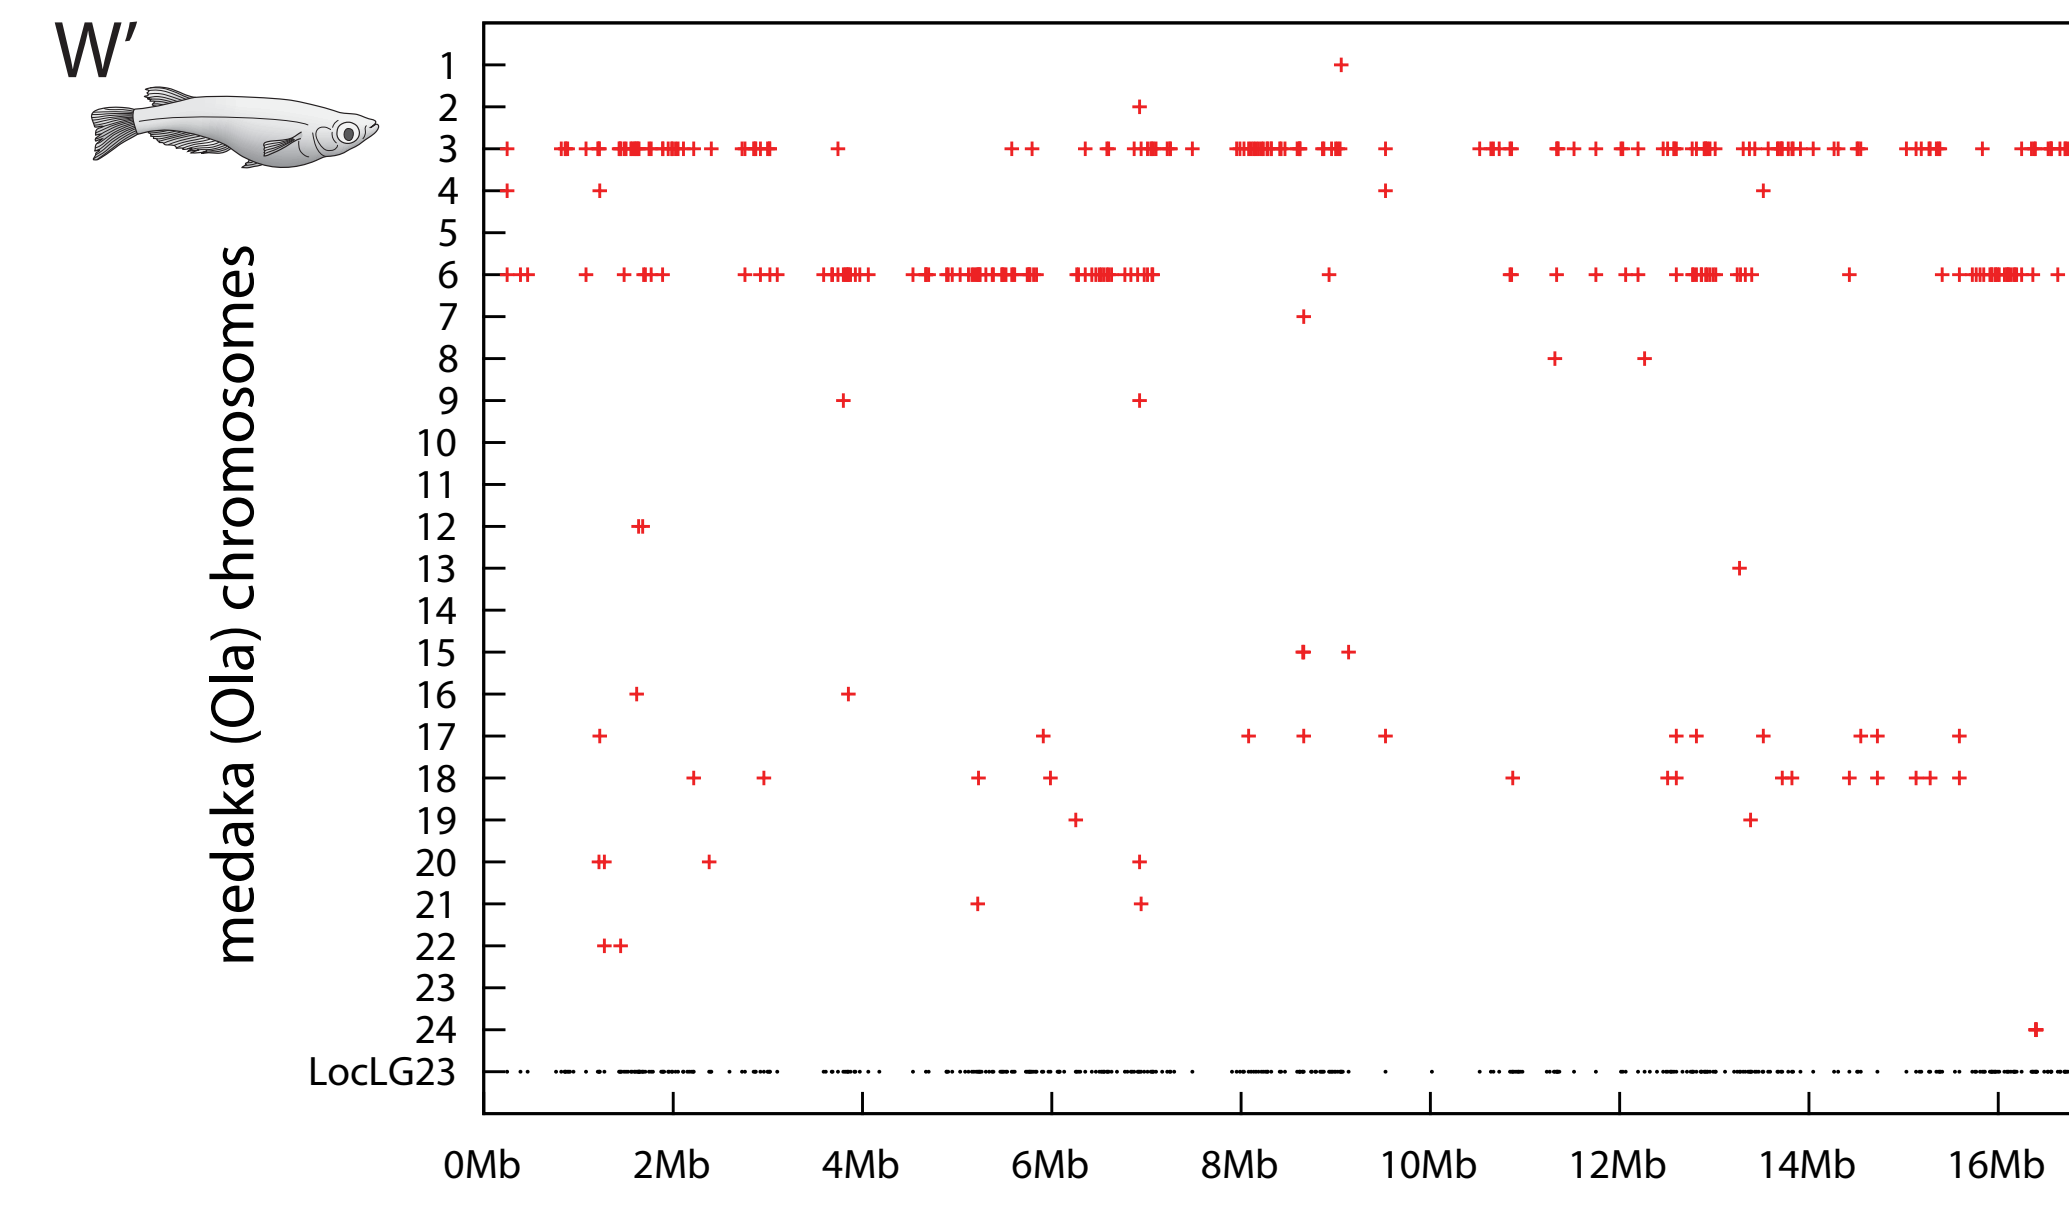

X Spotted Gar Linkage Group 24

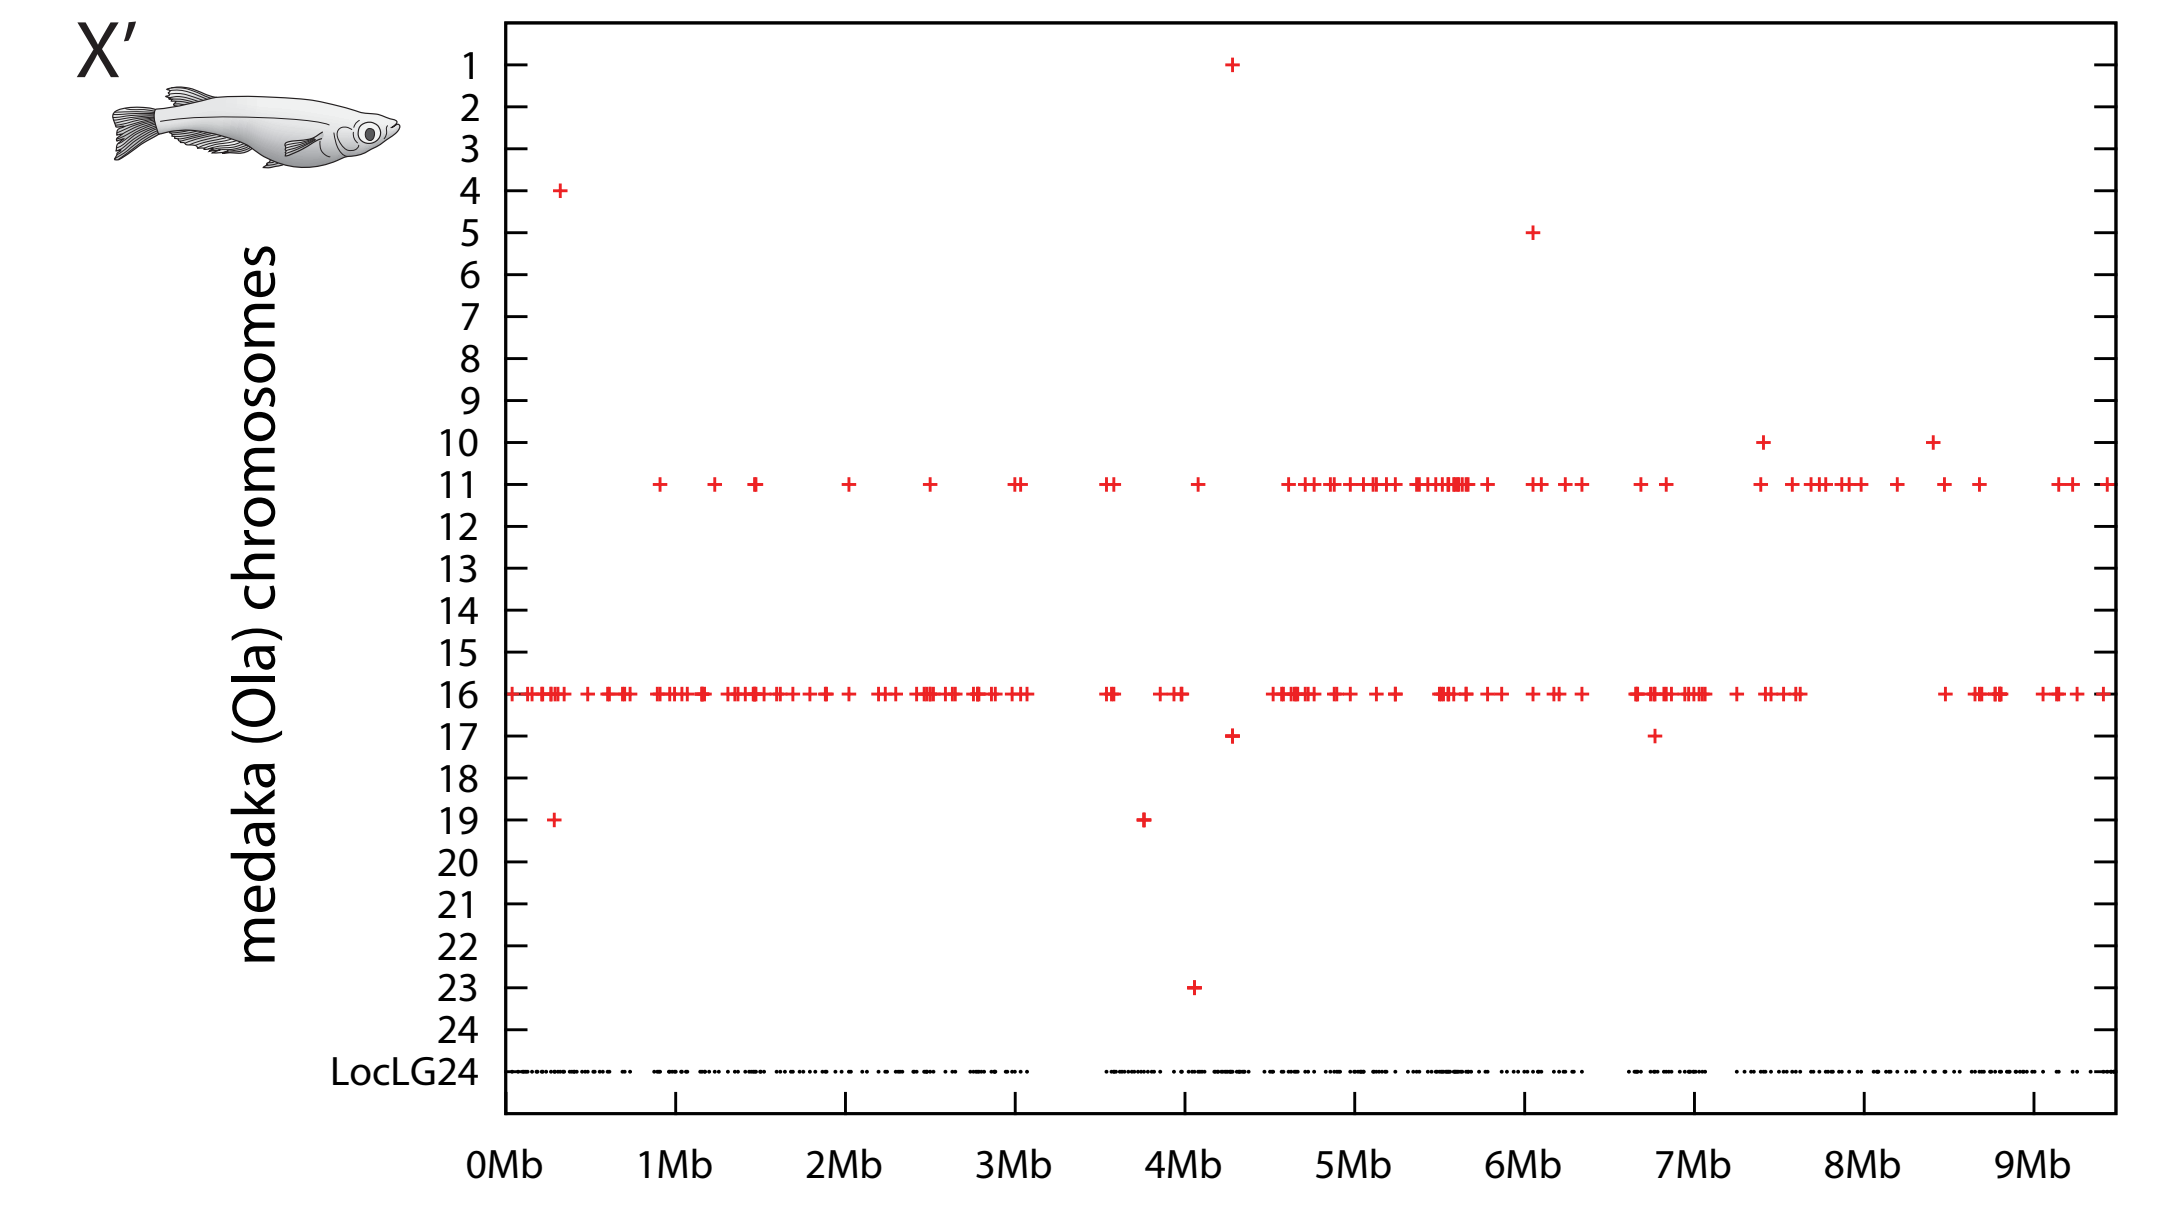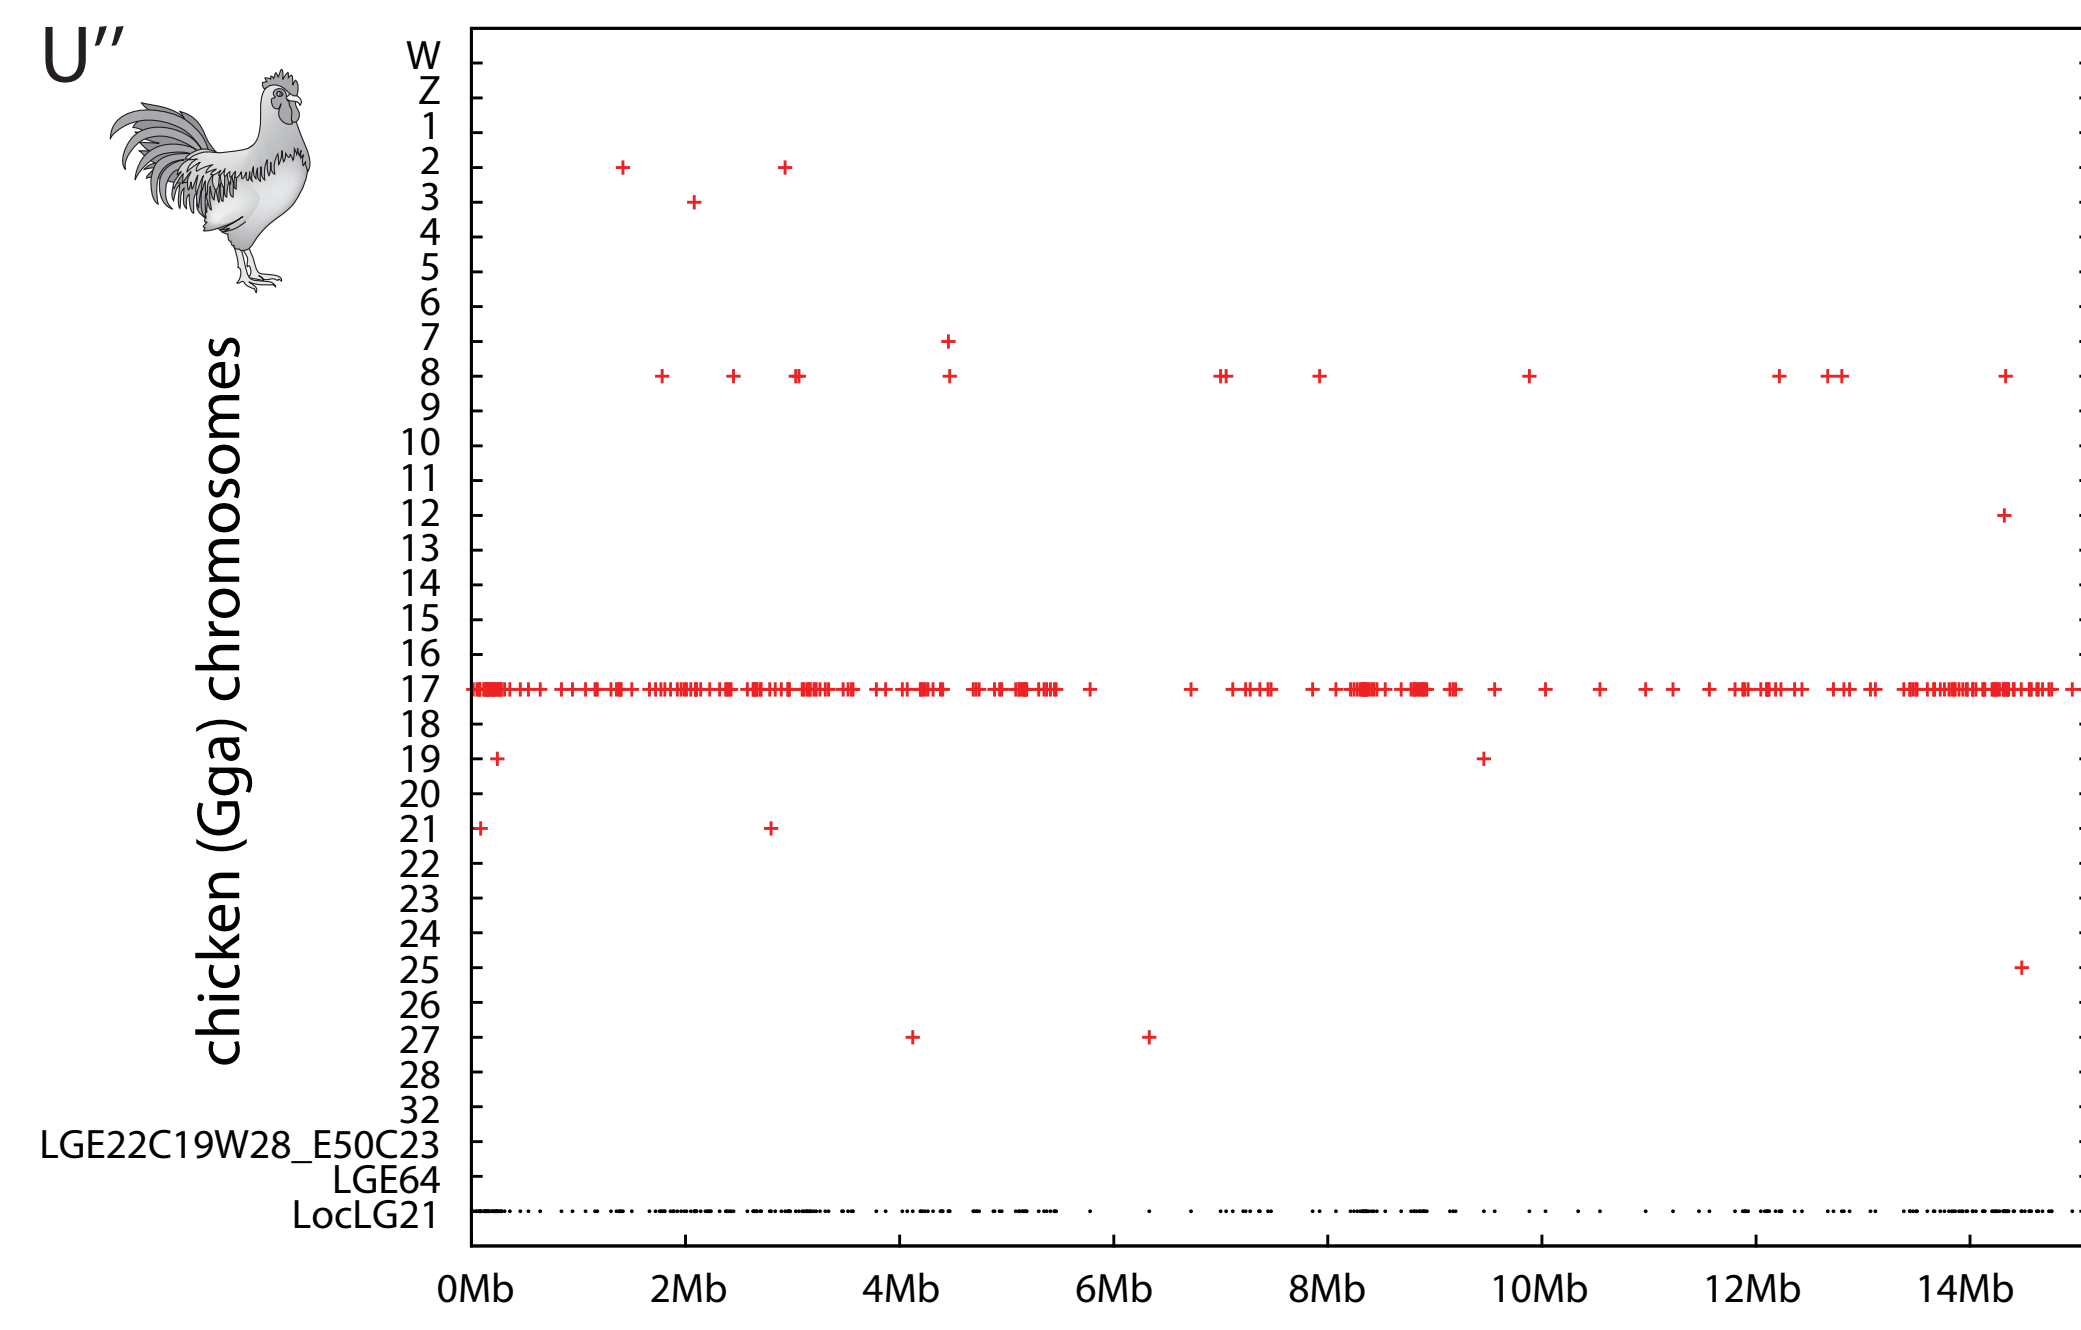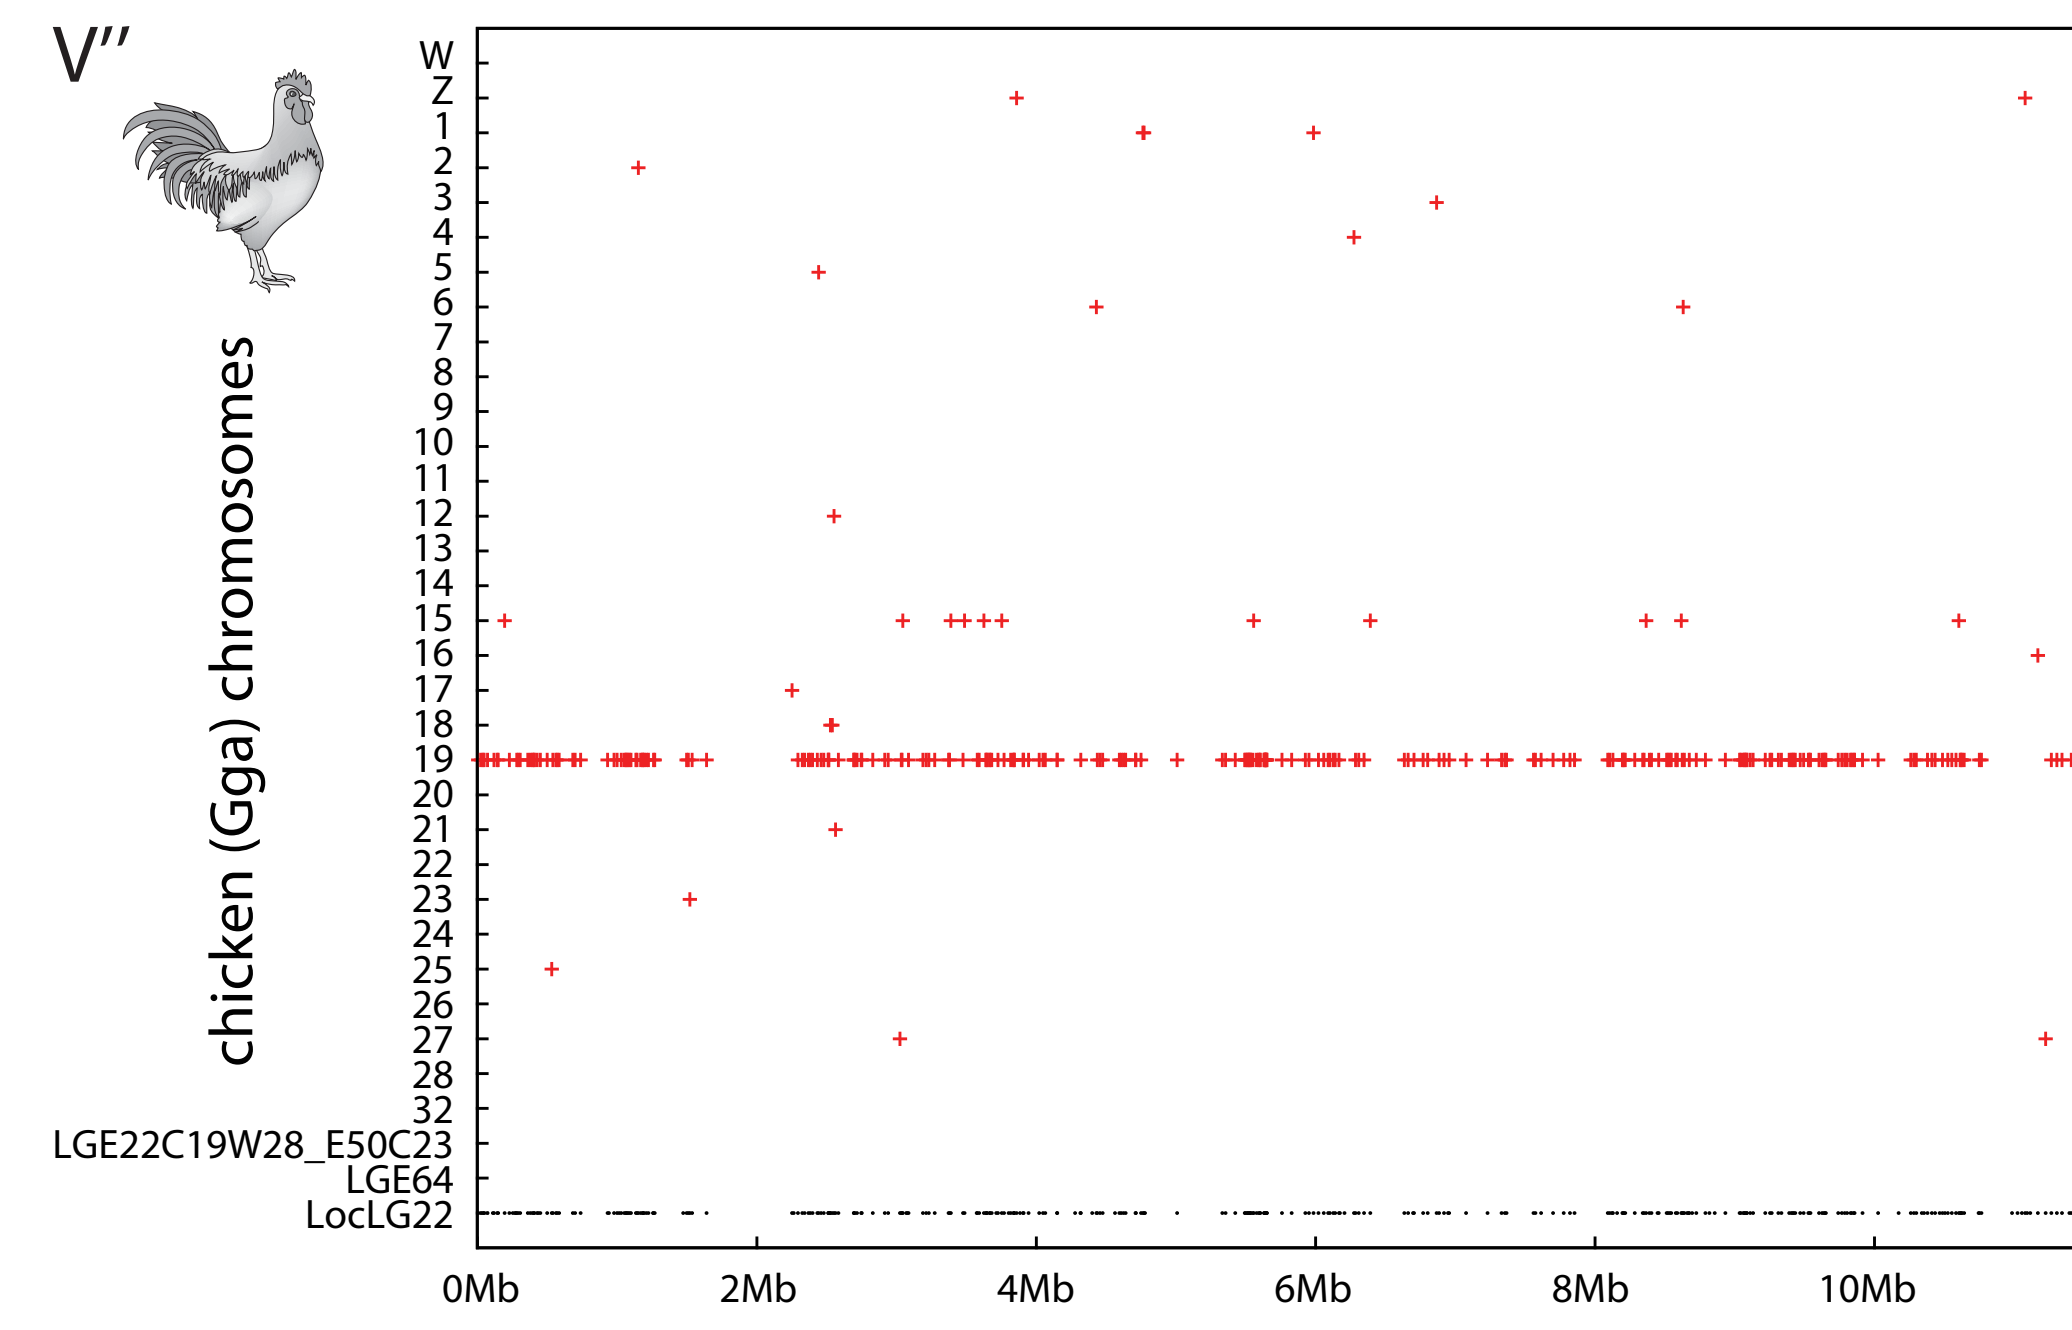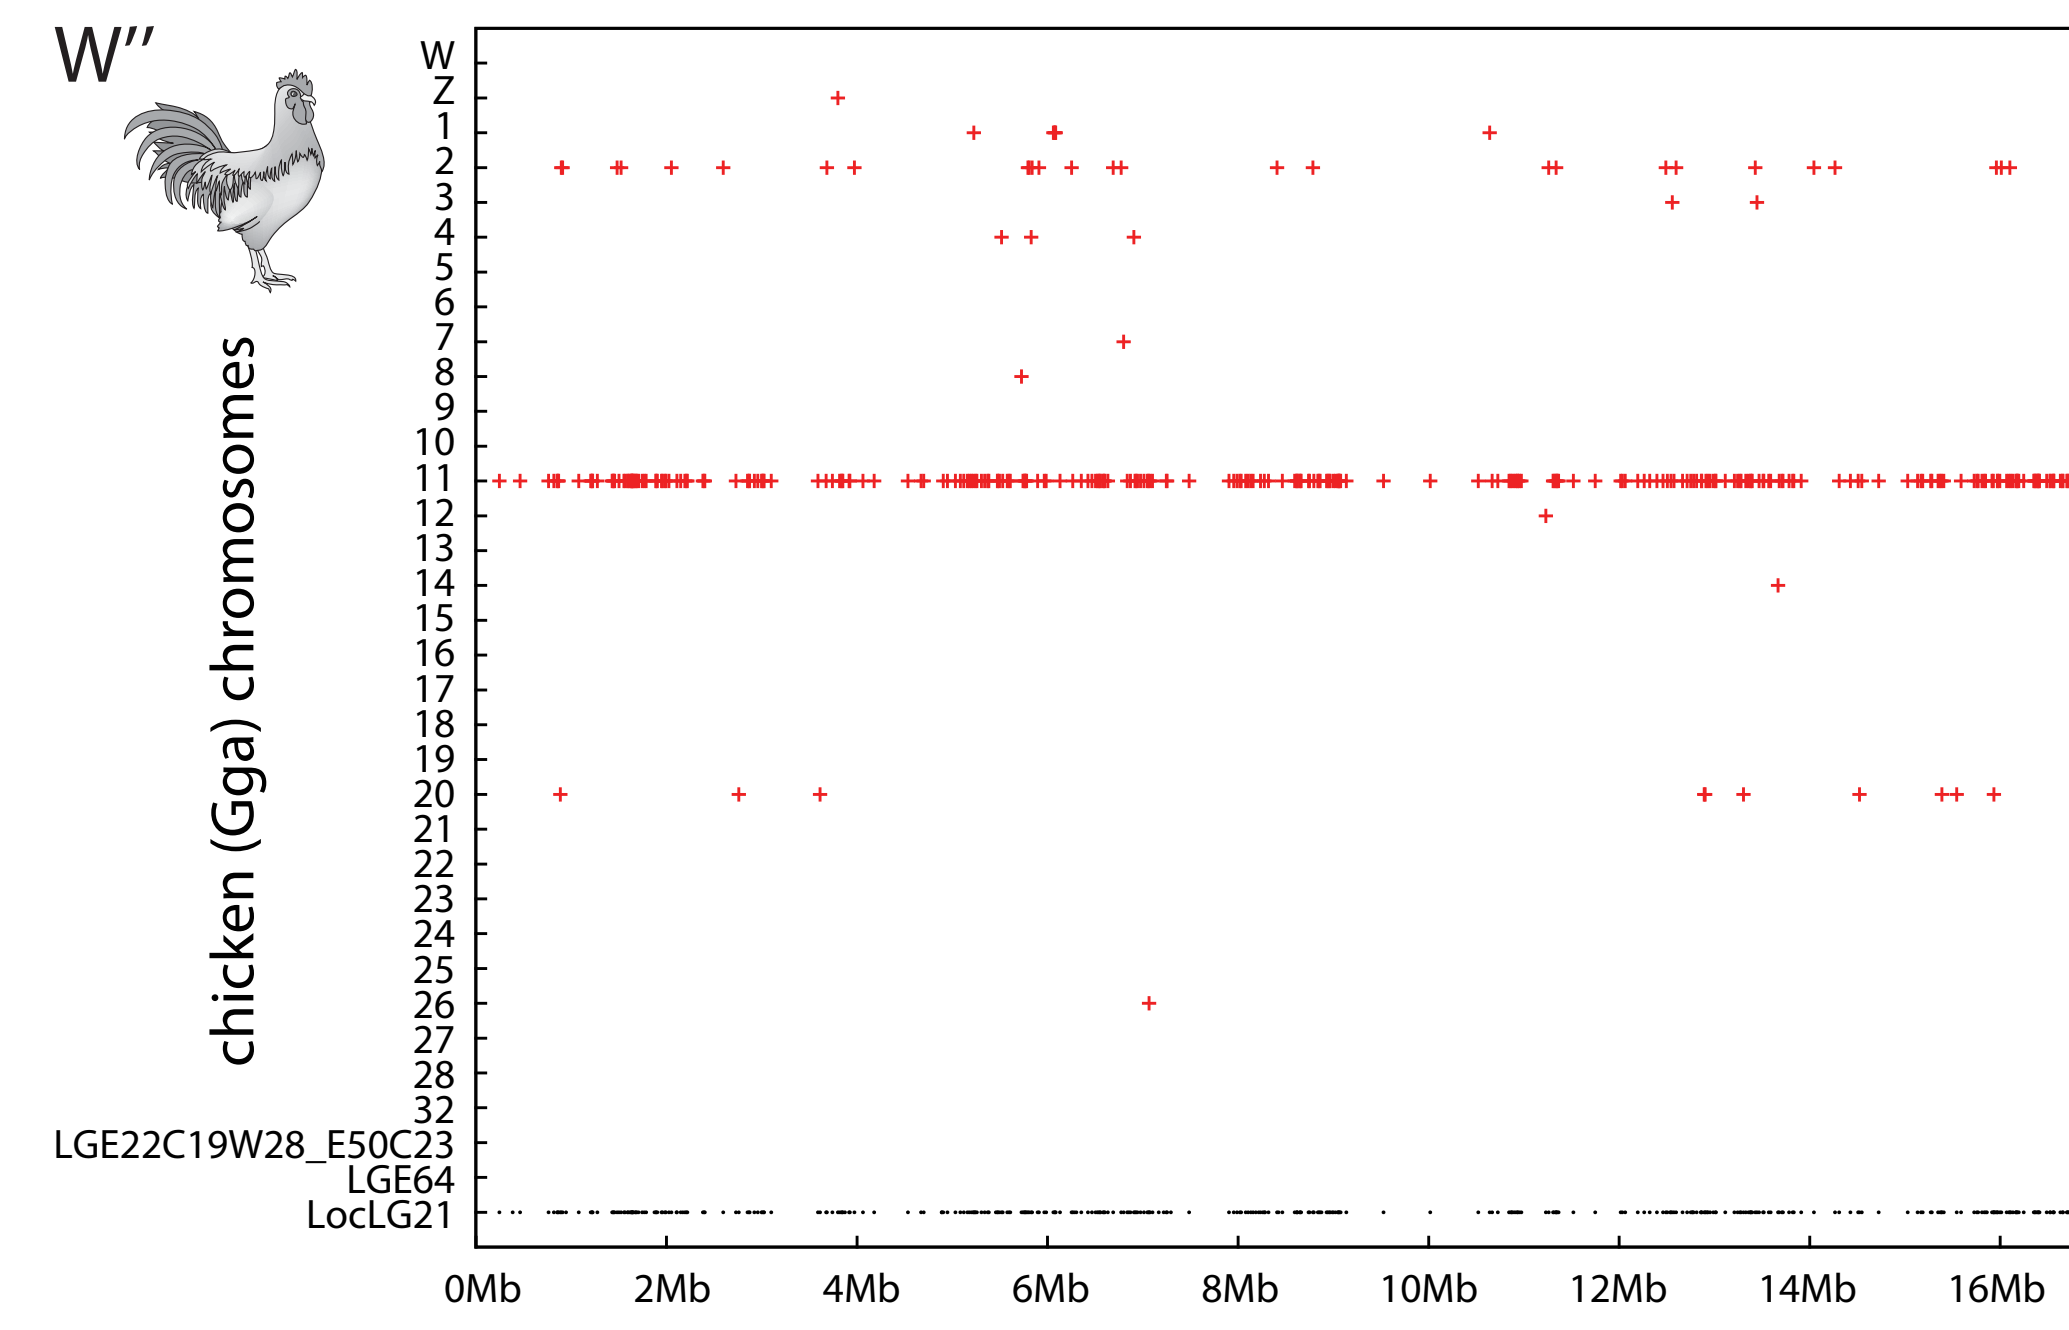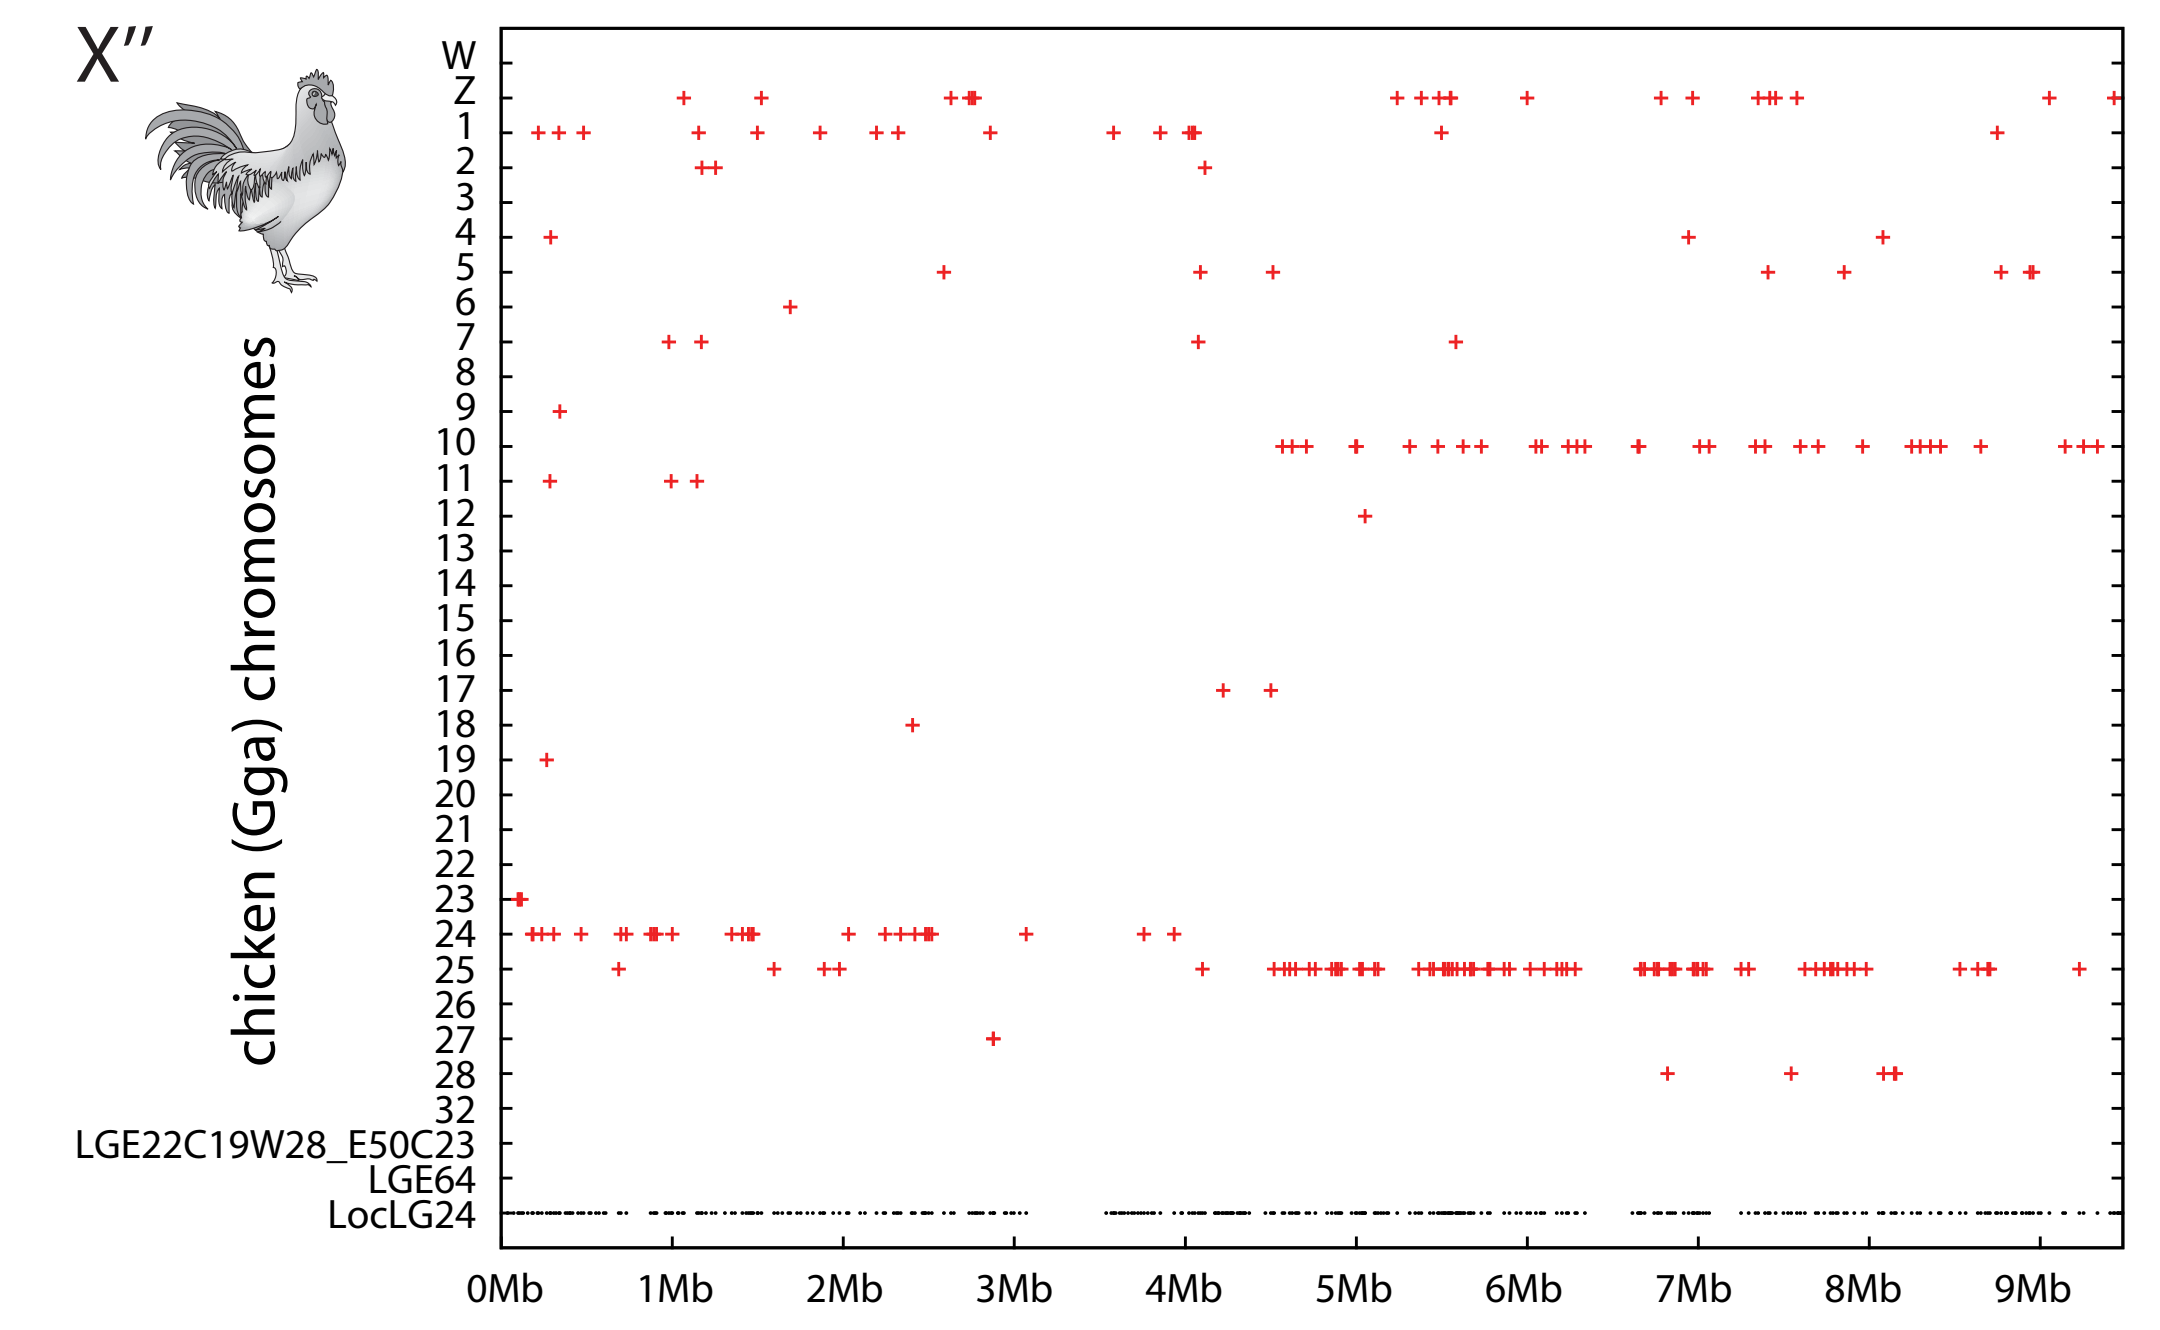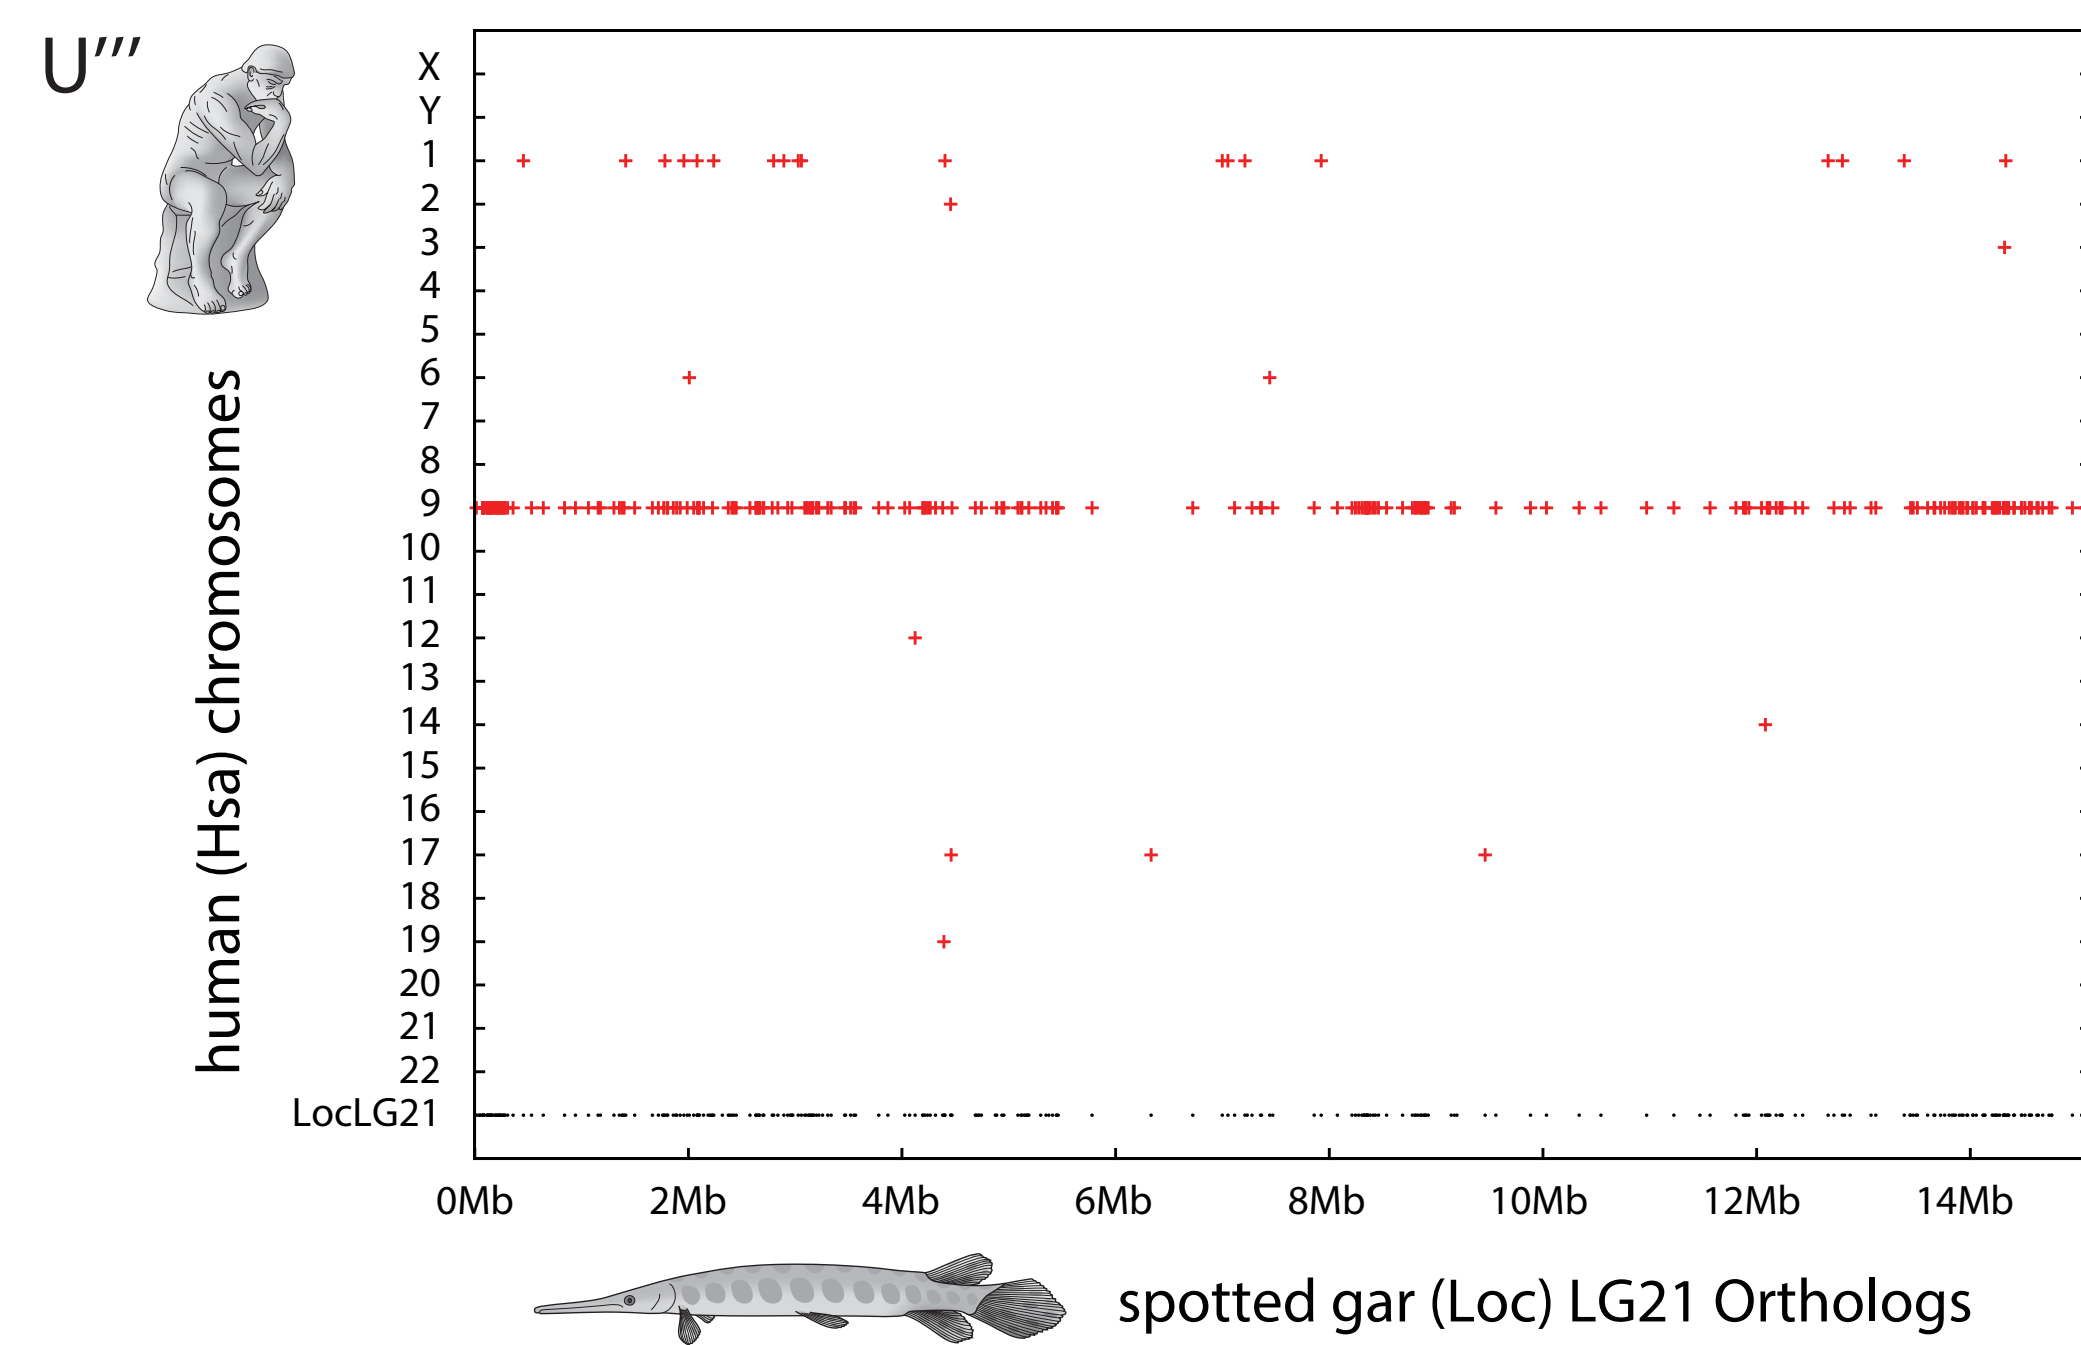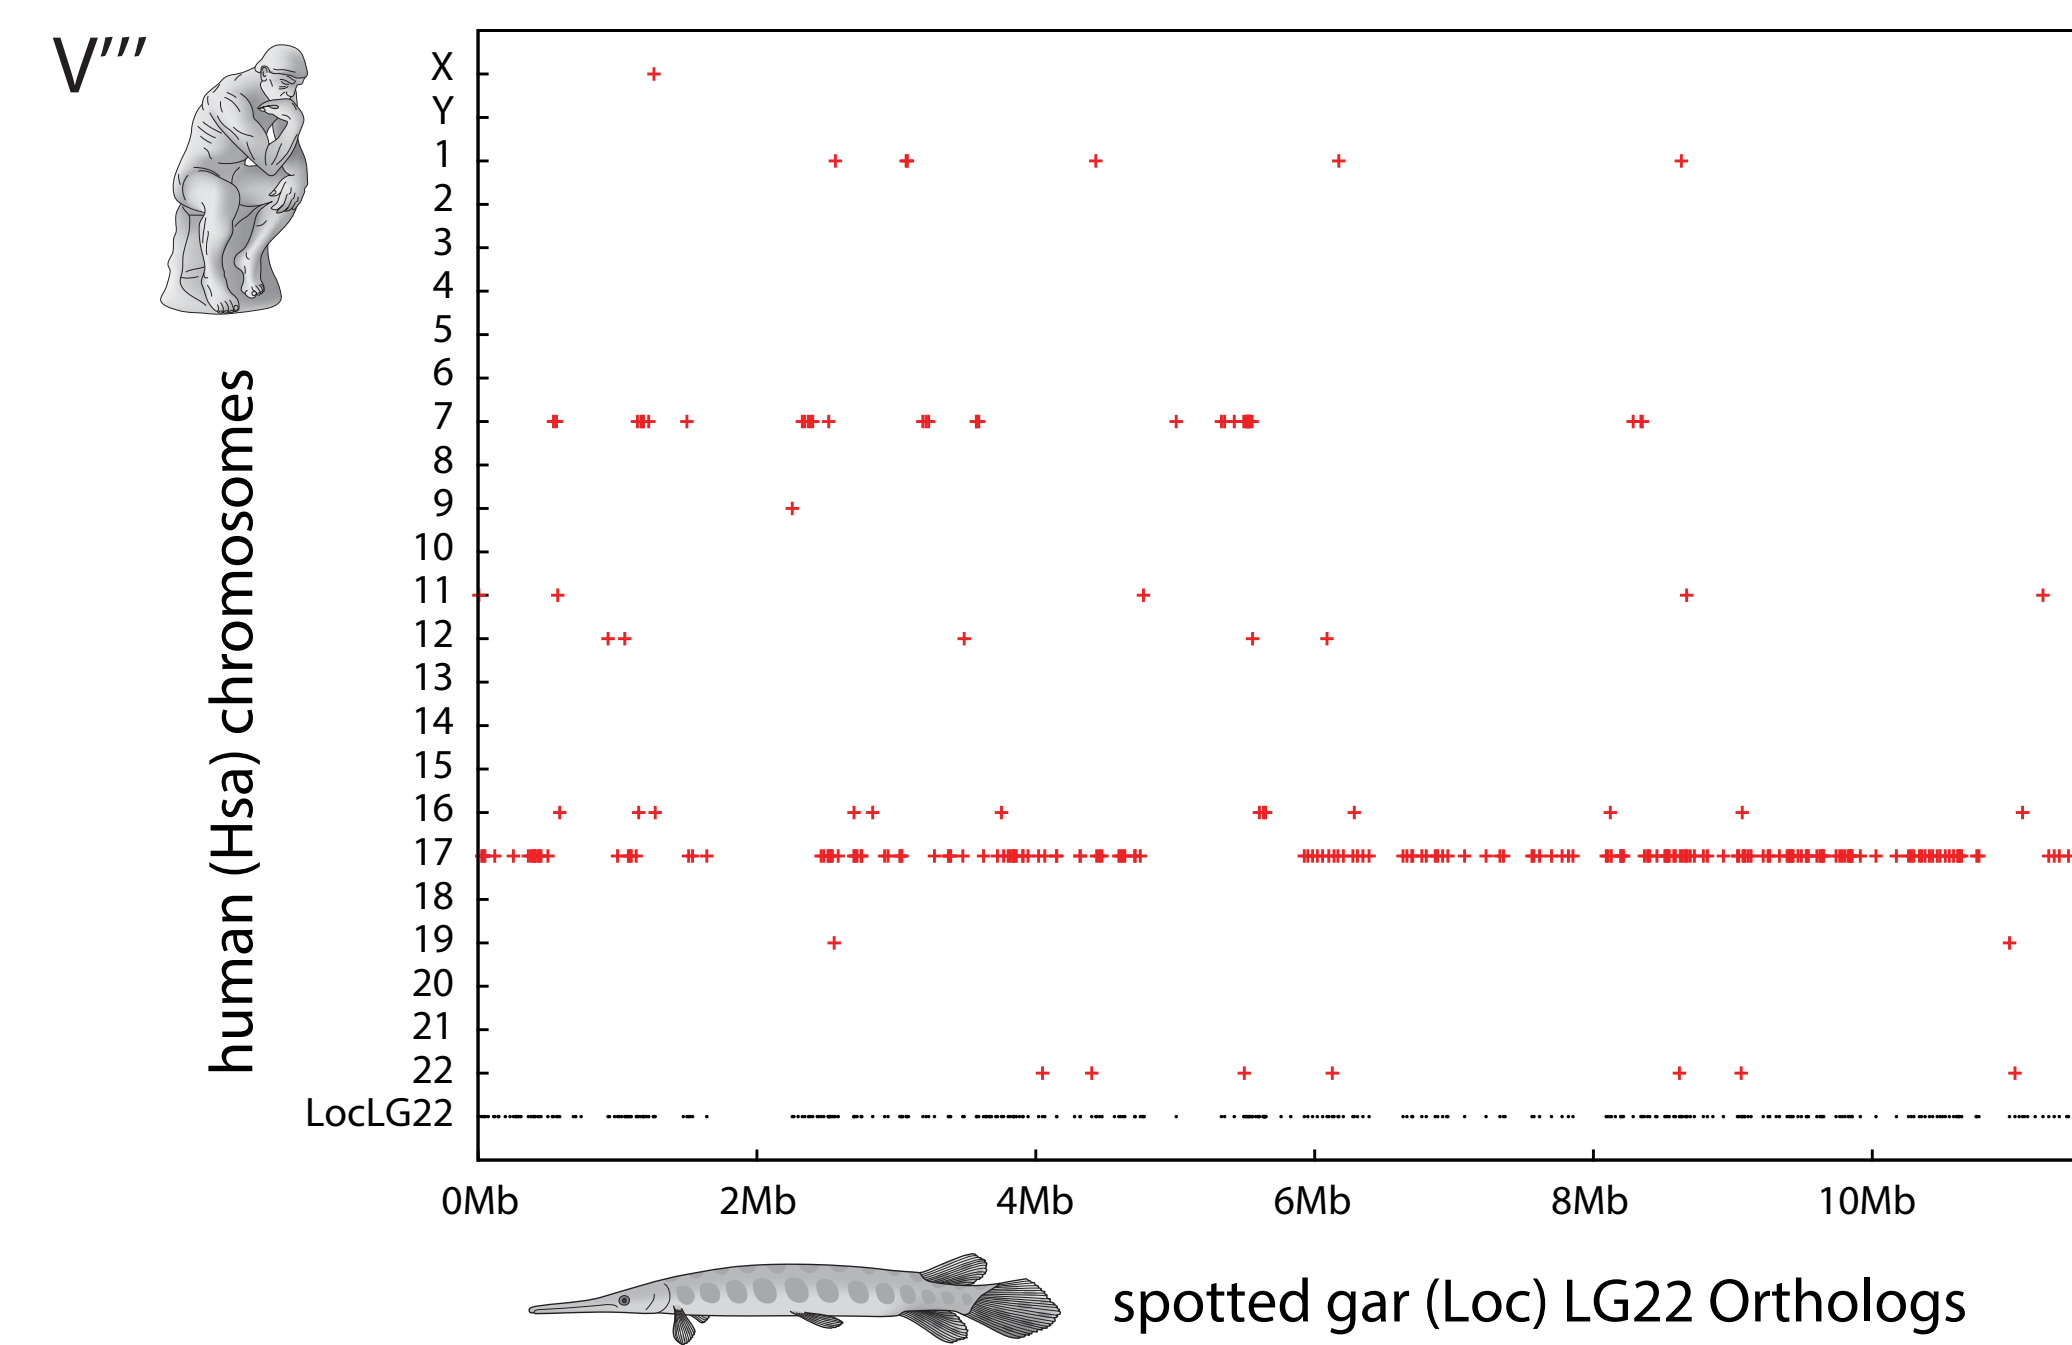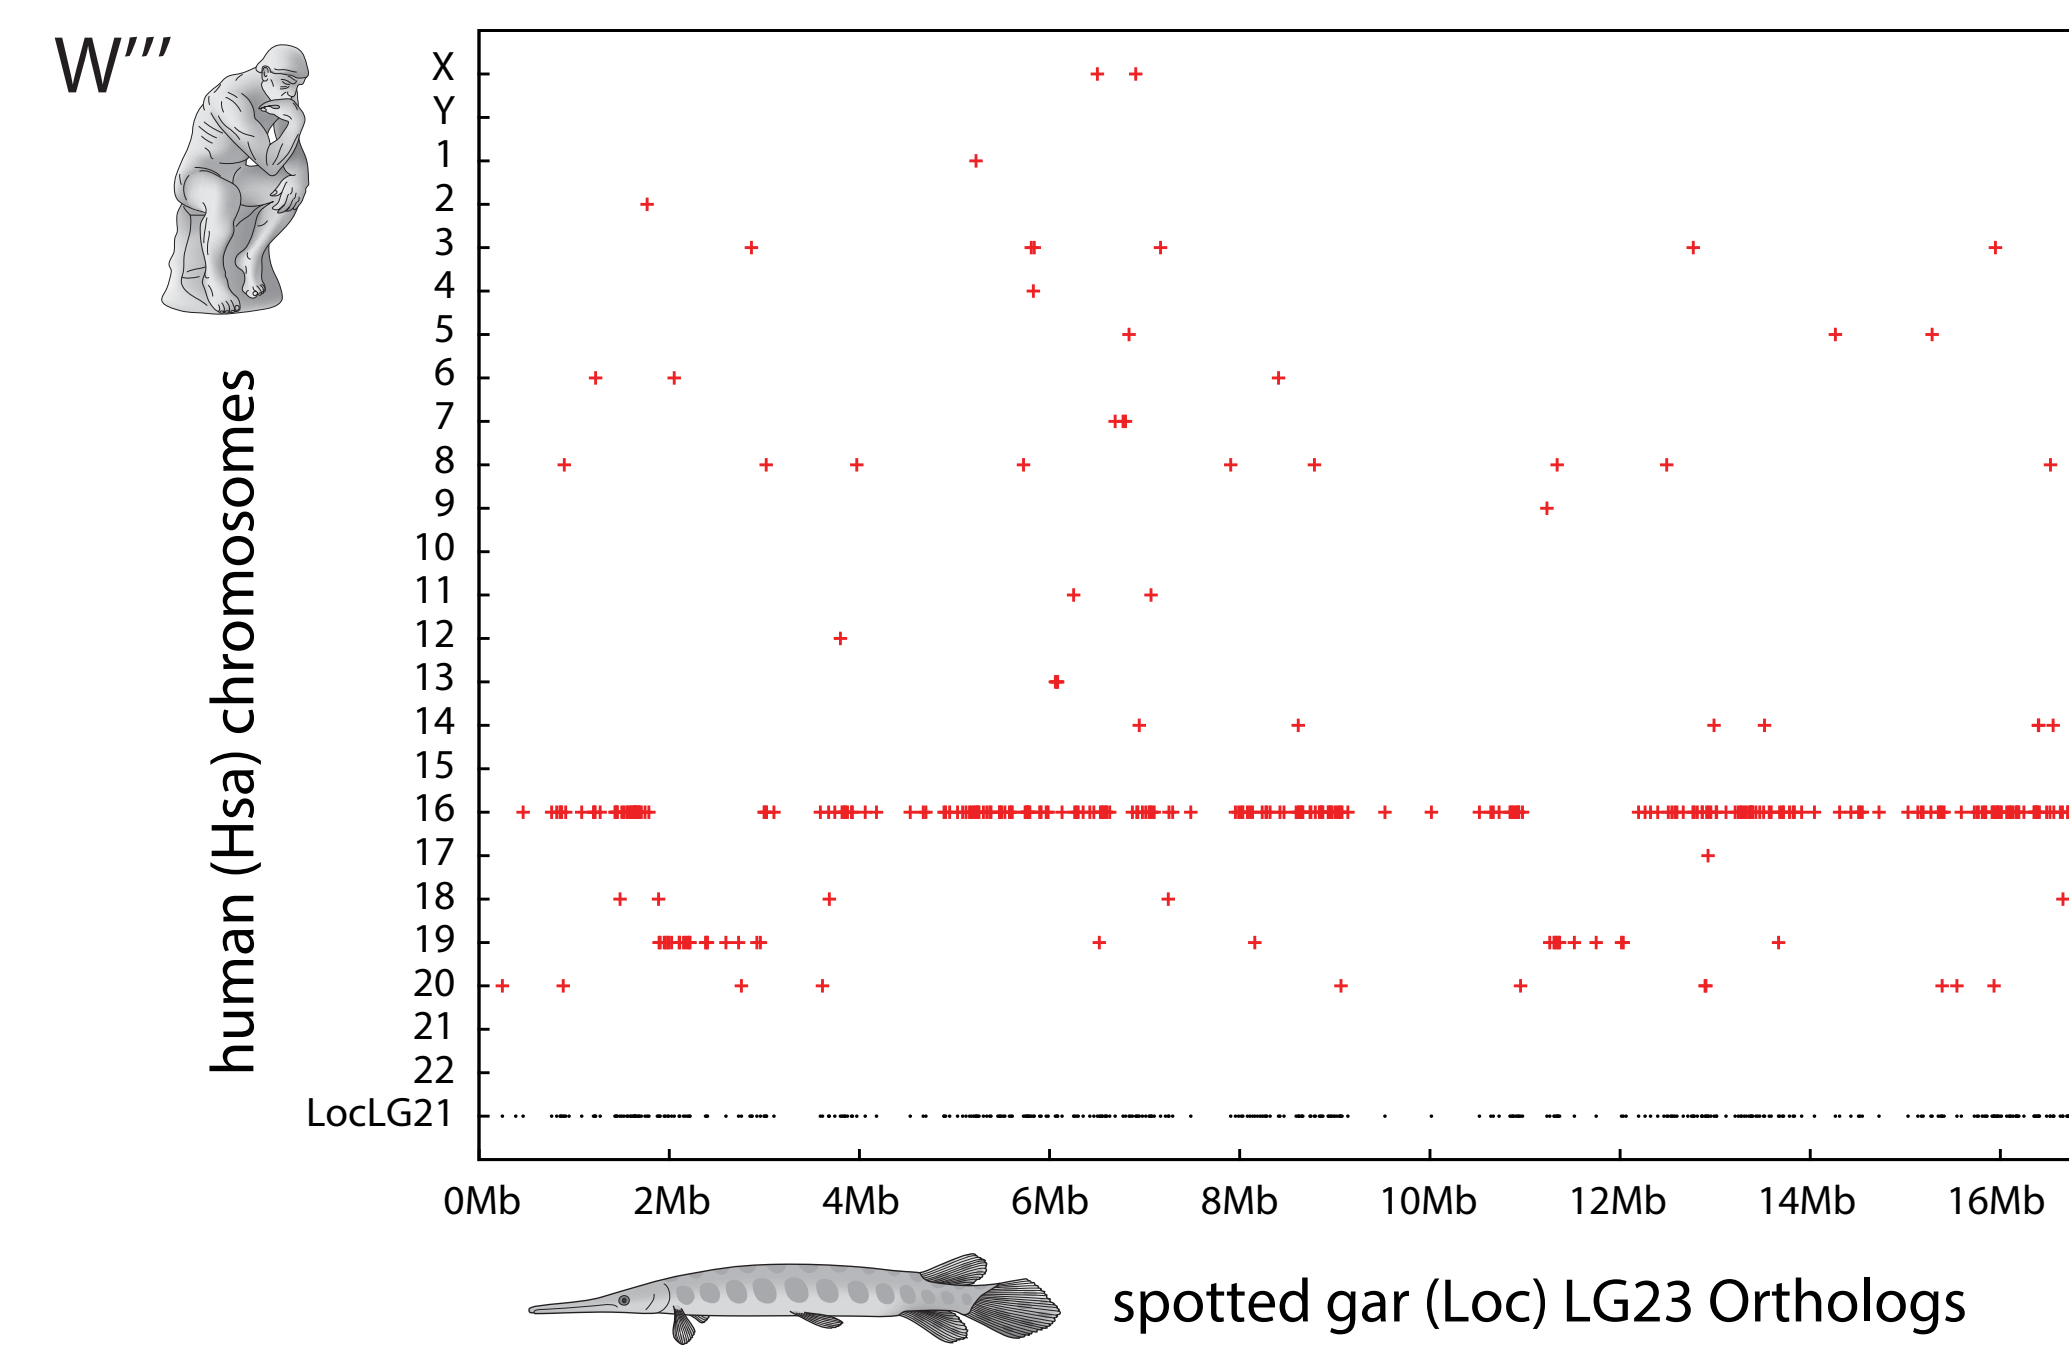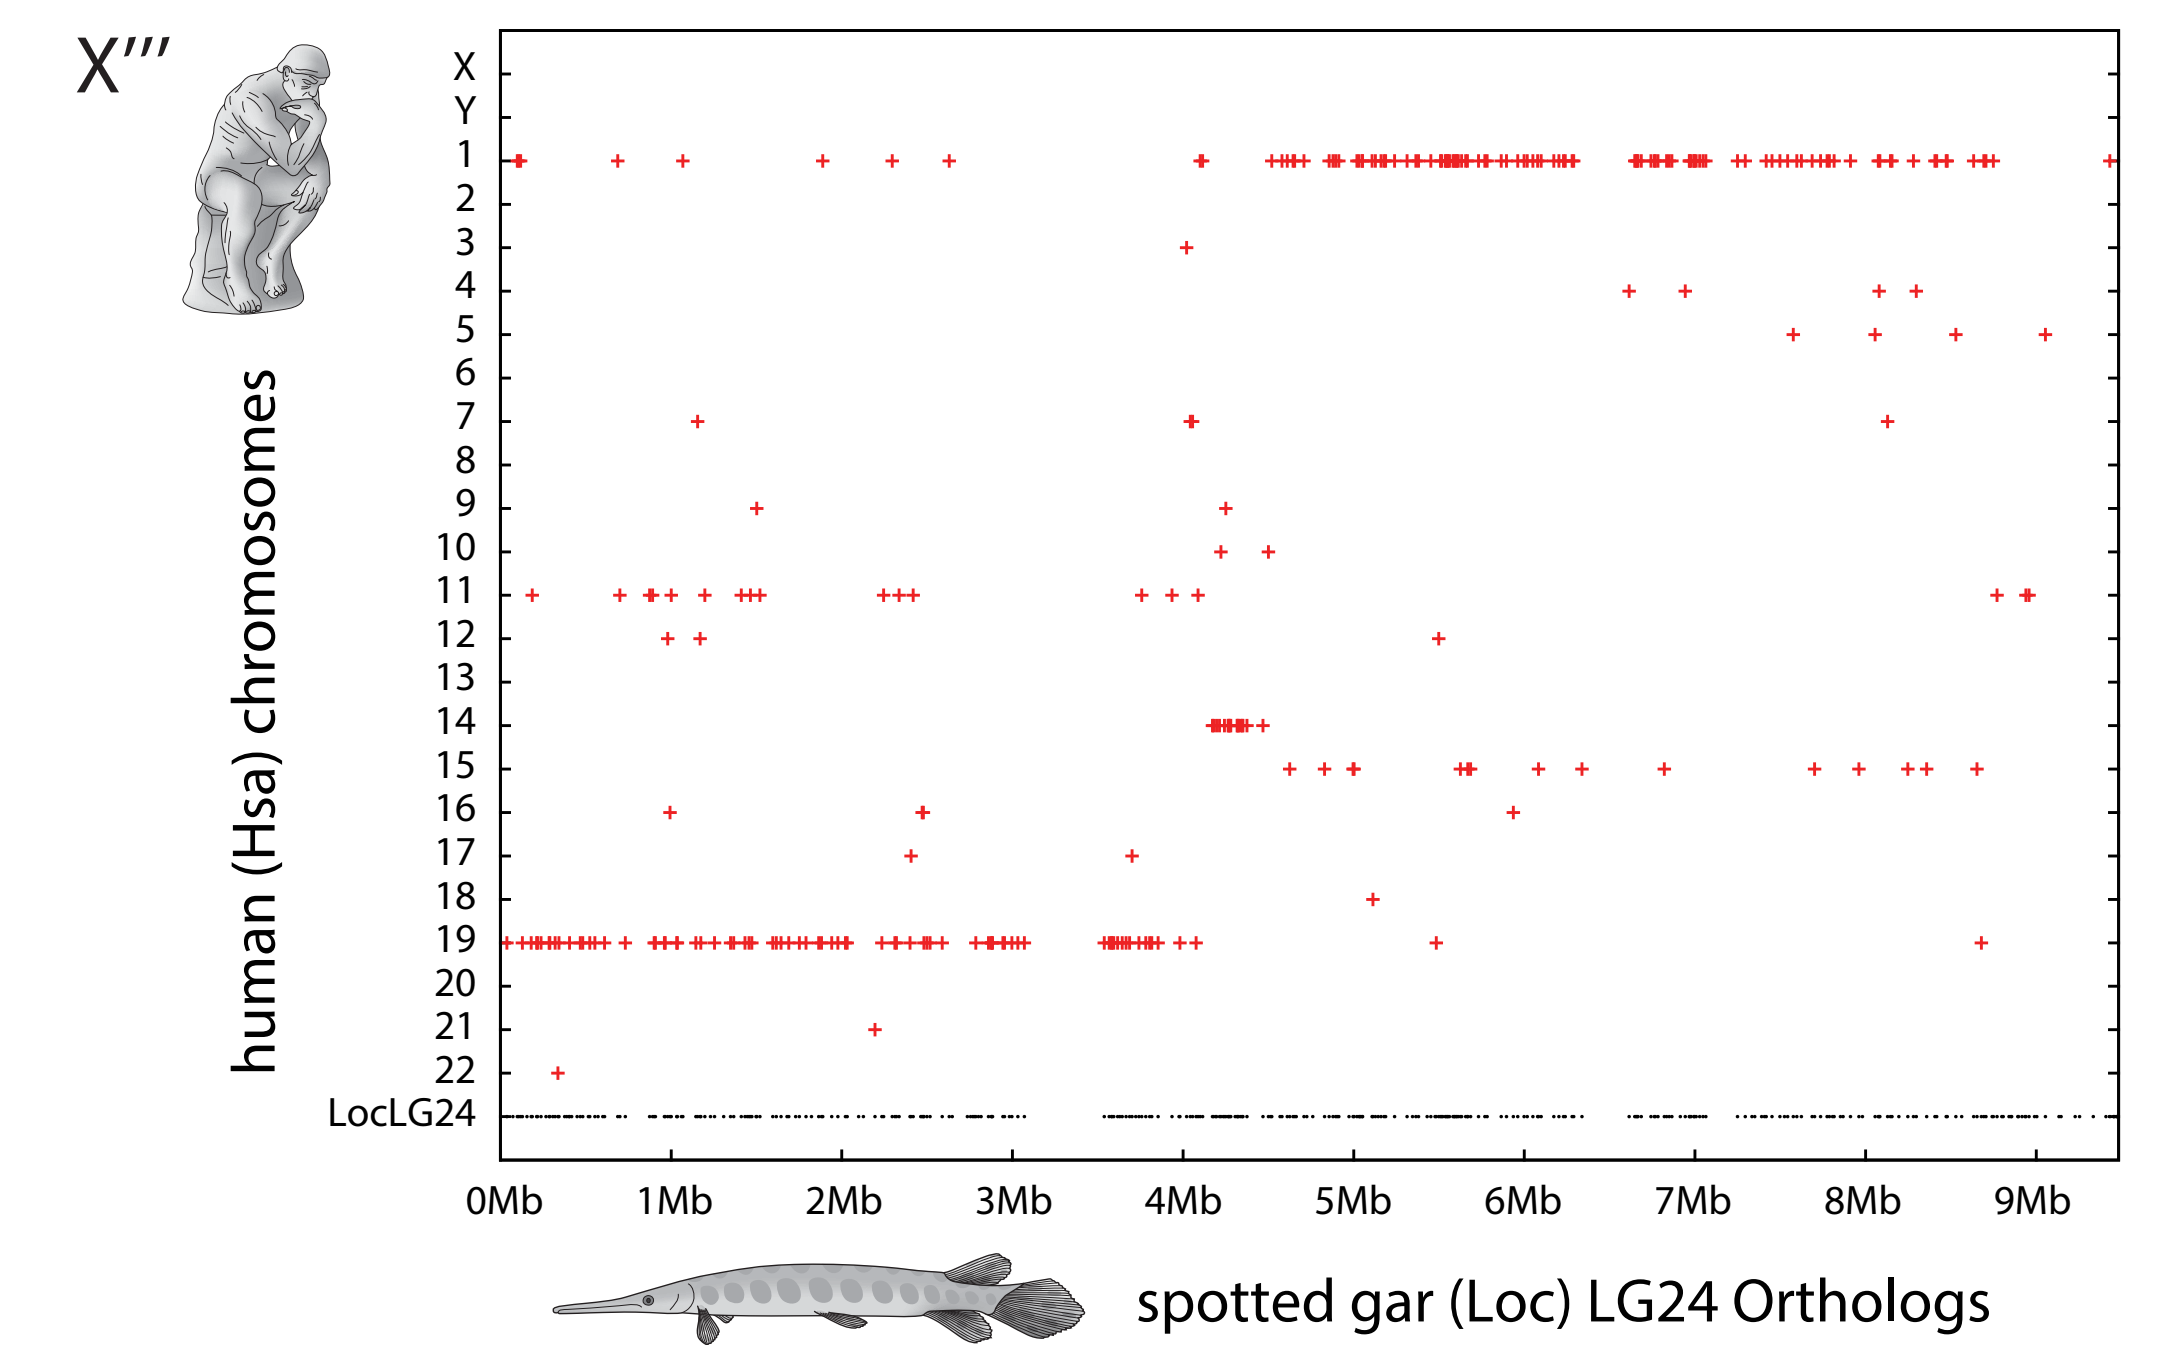

spotted gar (Loc) LG21 Orthologs

spotted gar (Loc) LG22 Orthologs

spotted gar (Loc) LG23 Orthologs

spotted gar (Loc) LG24 Orthologs



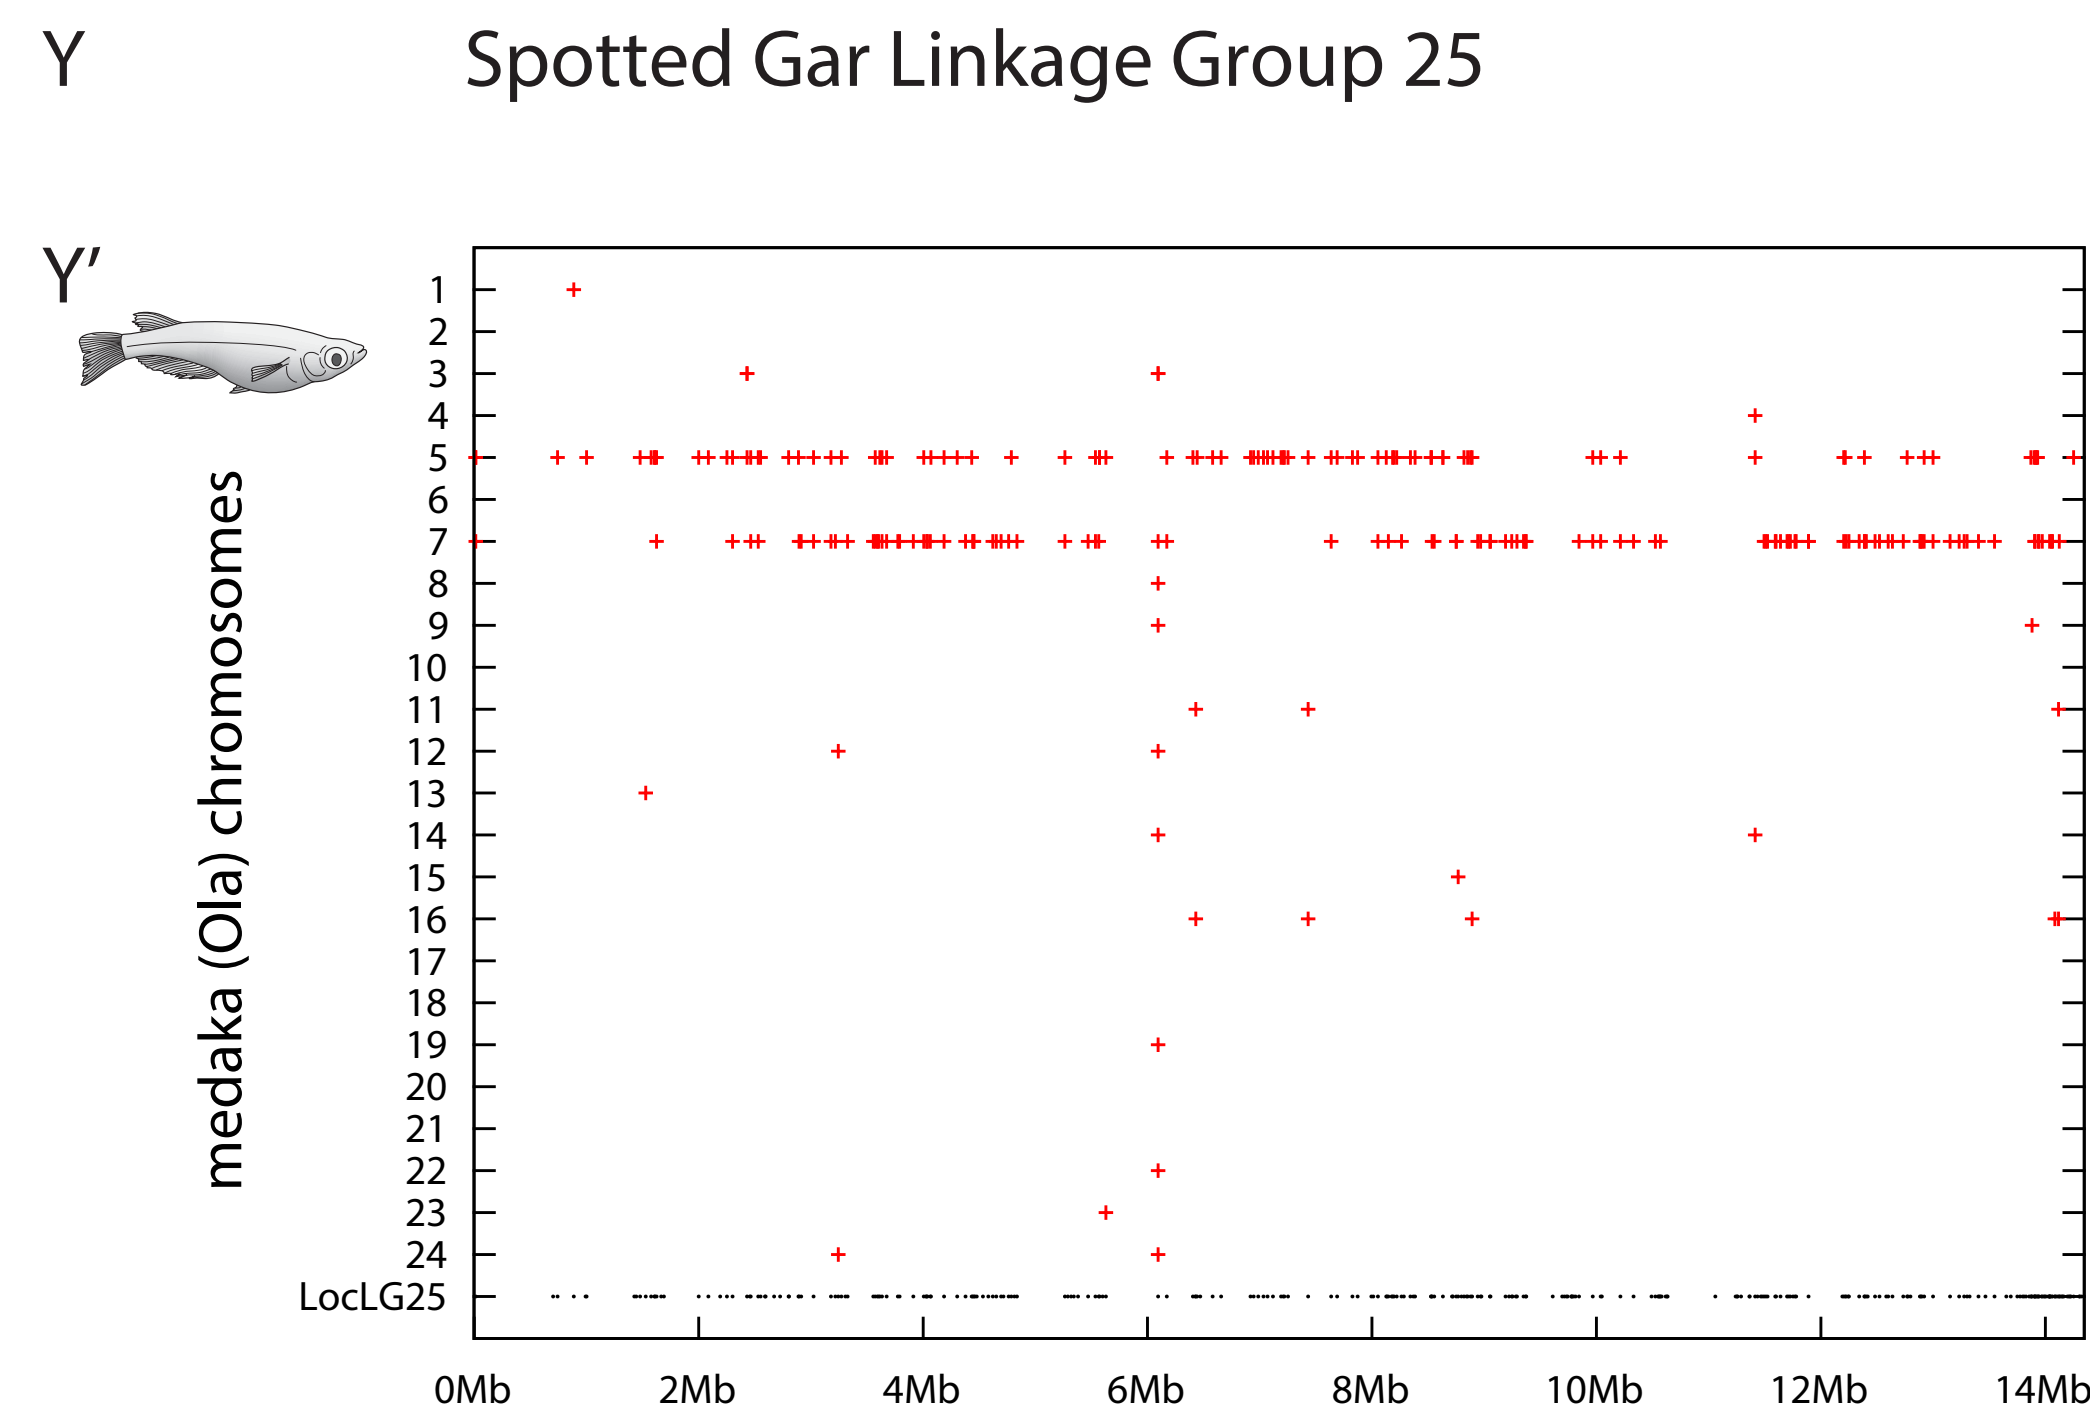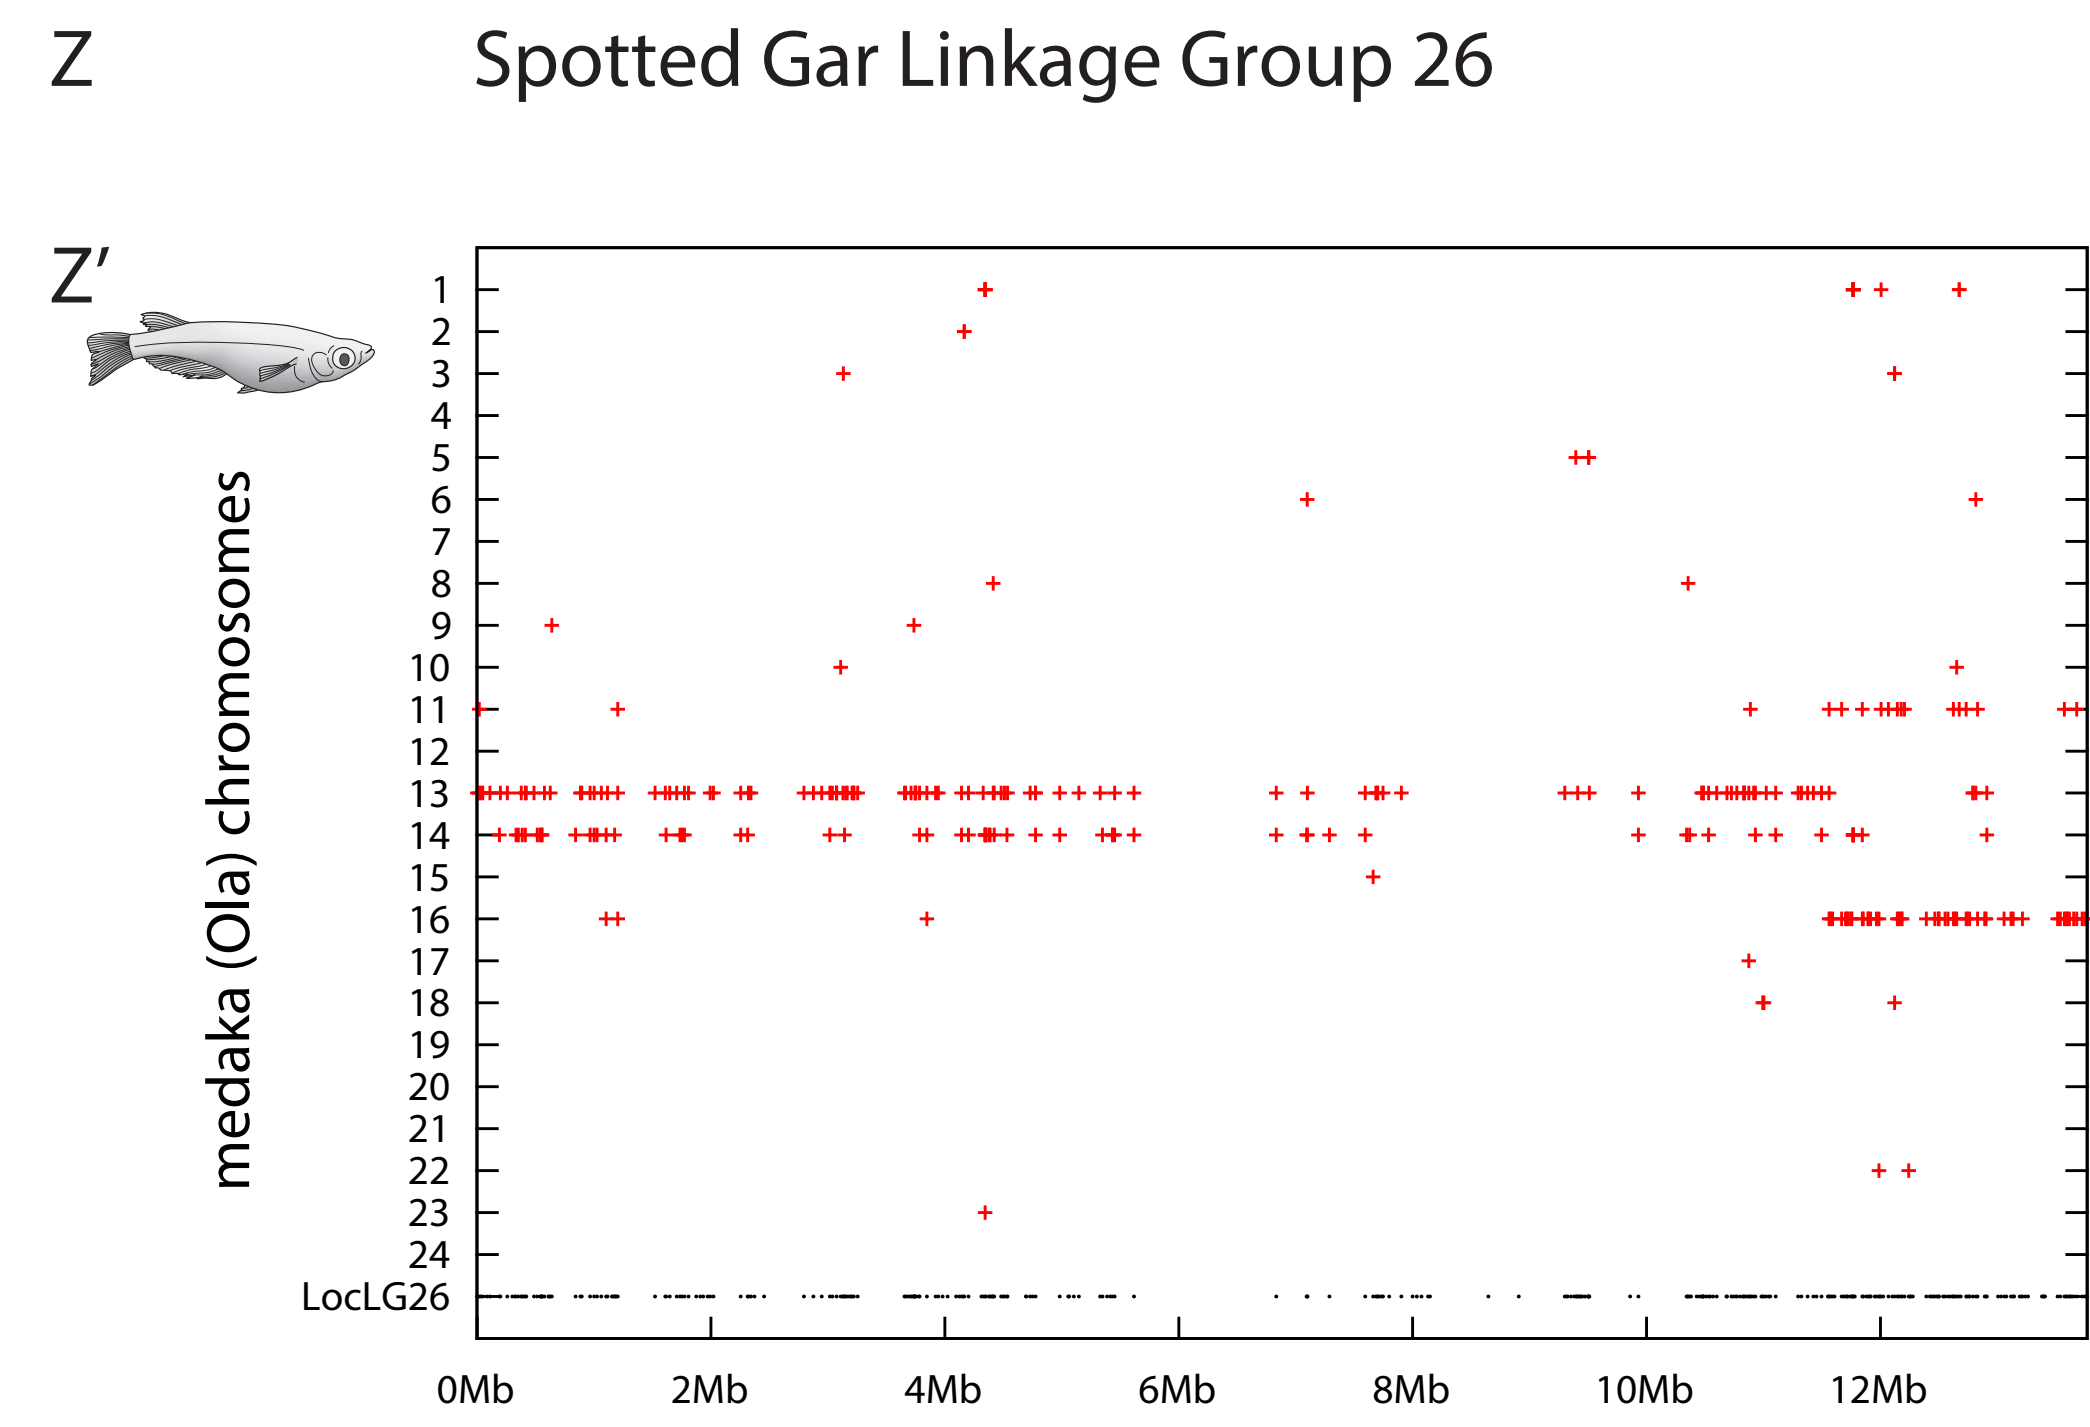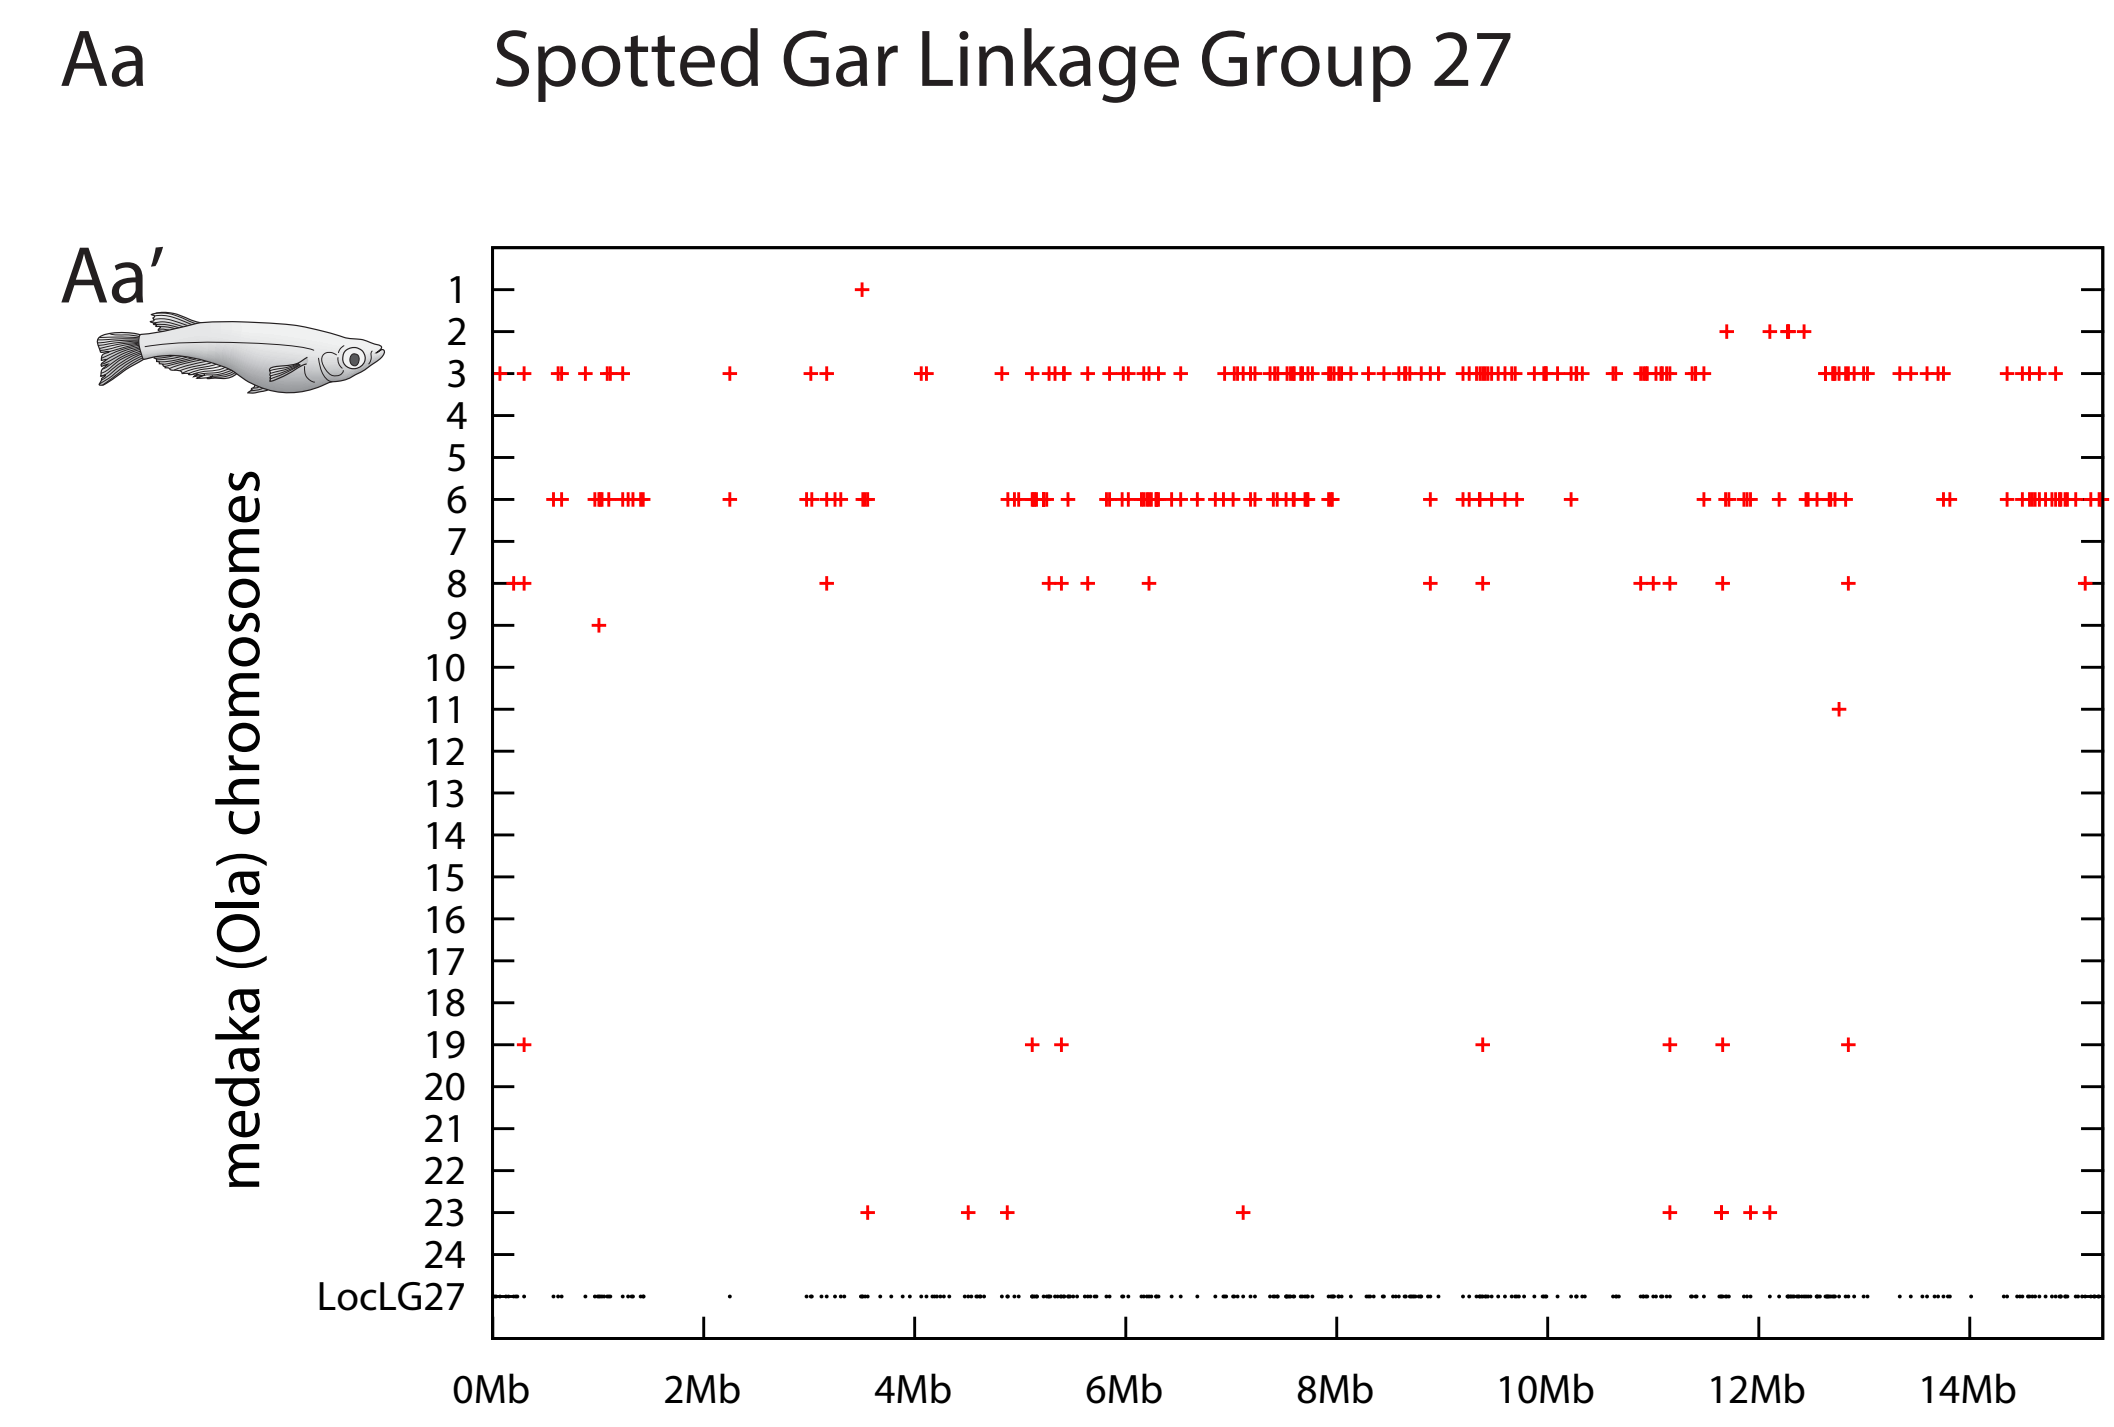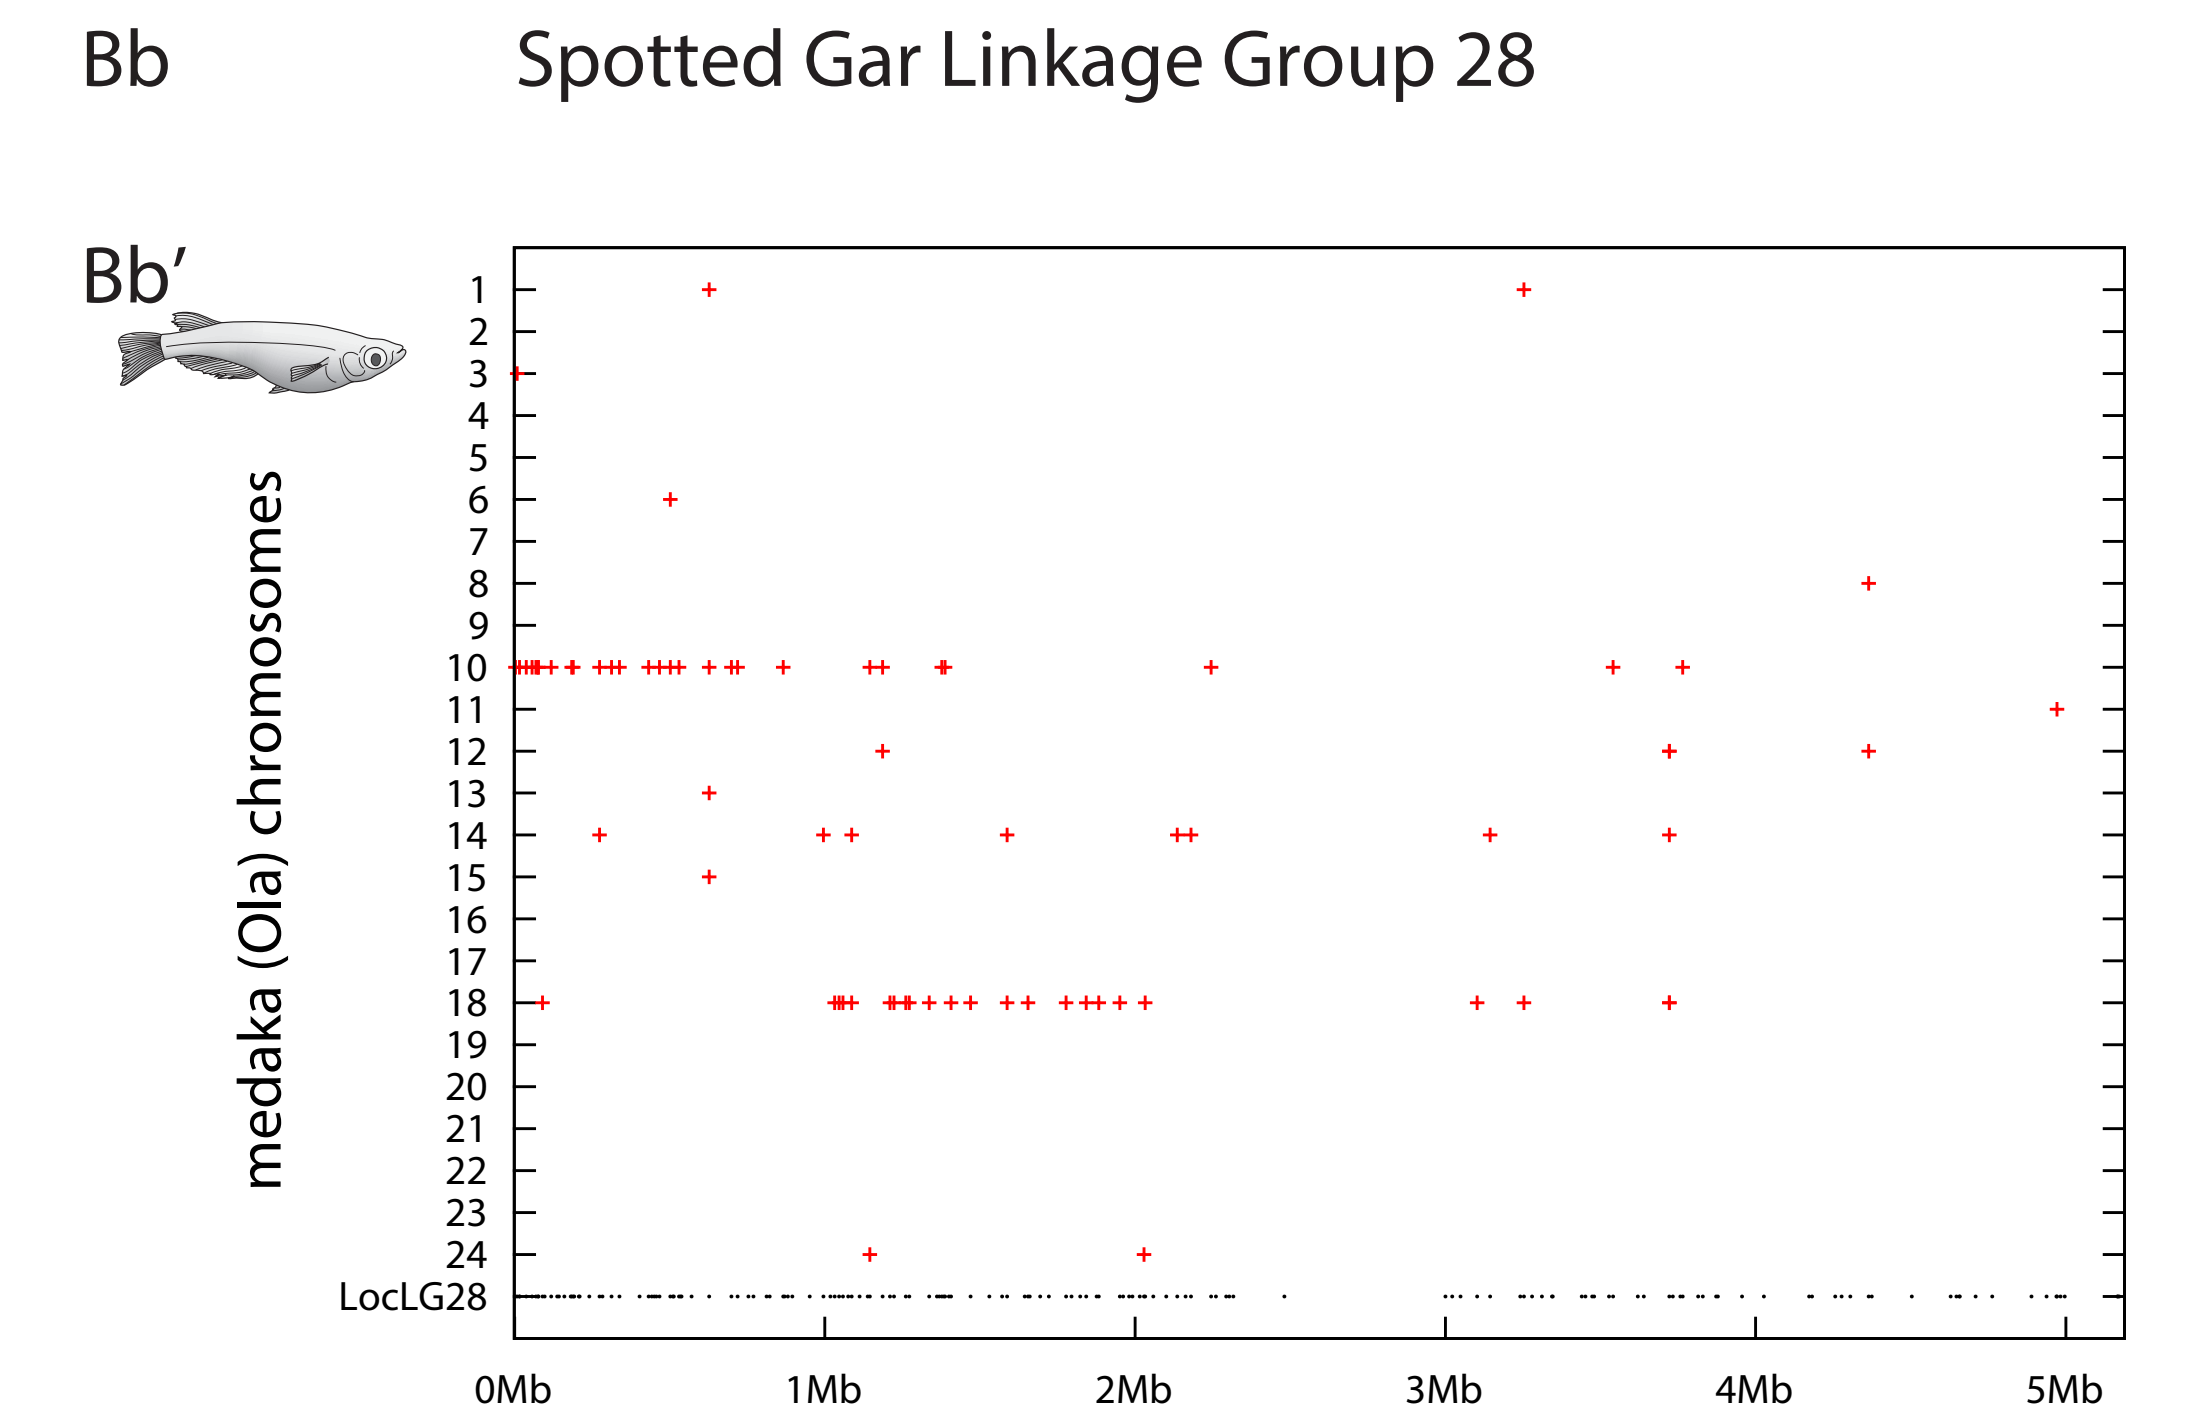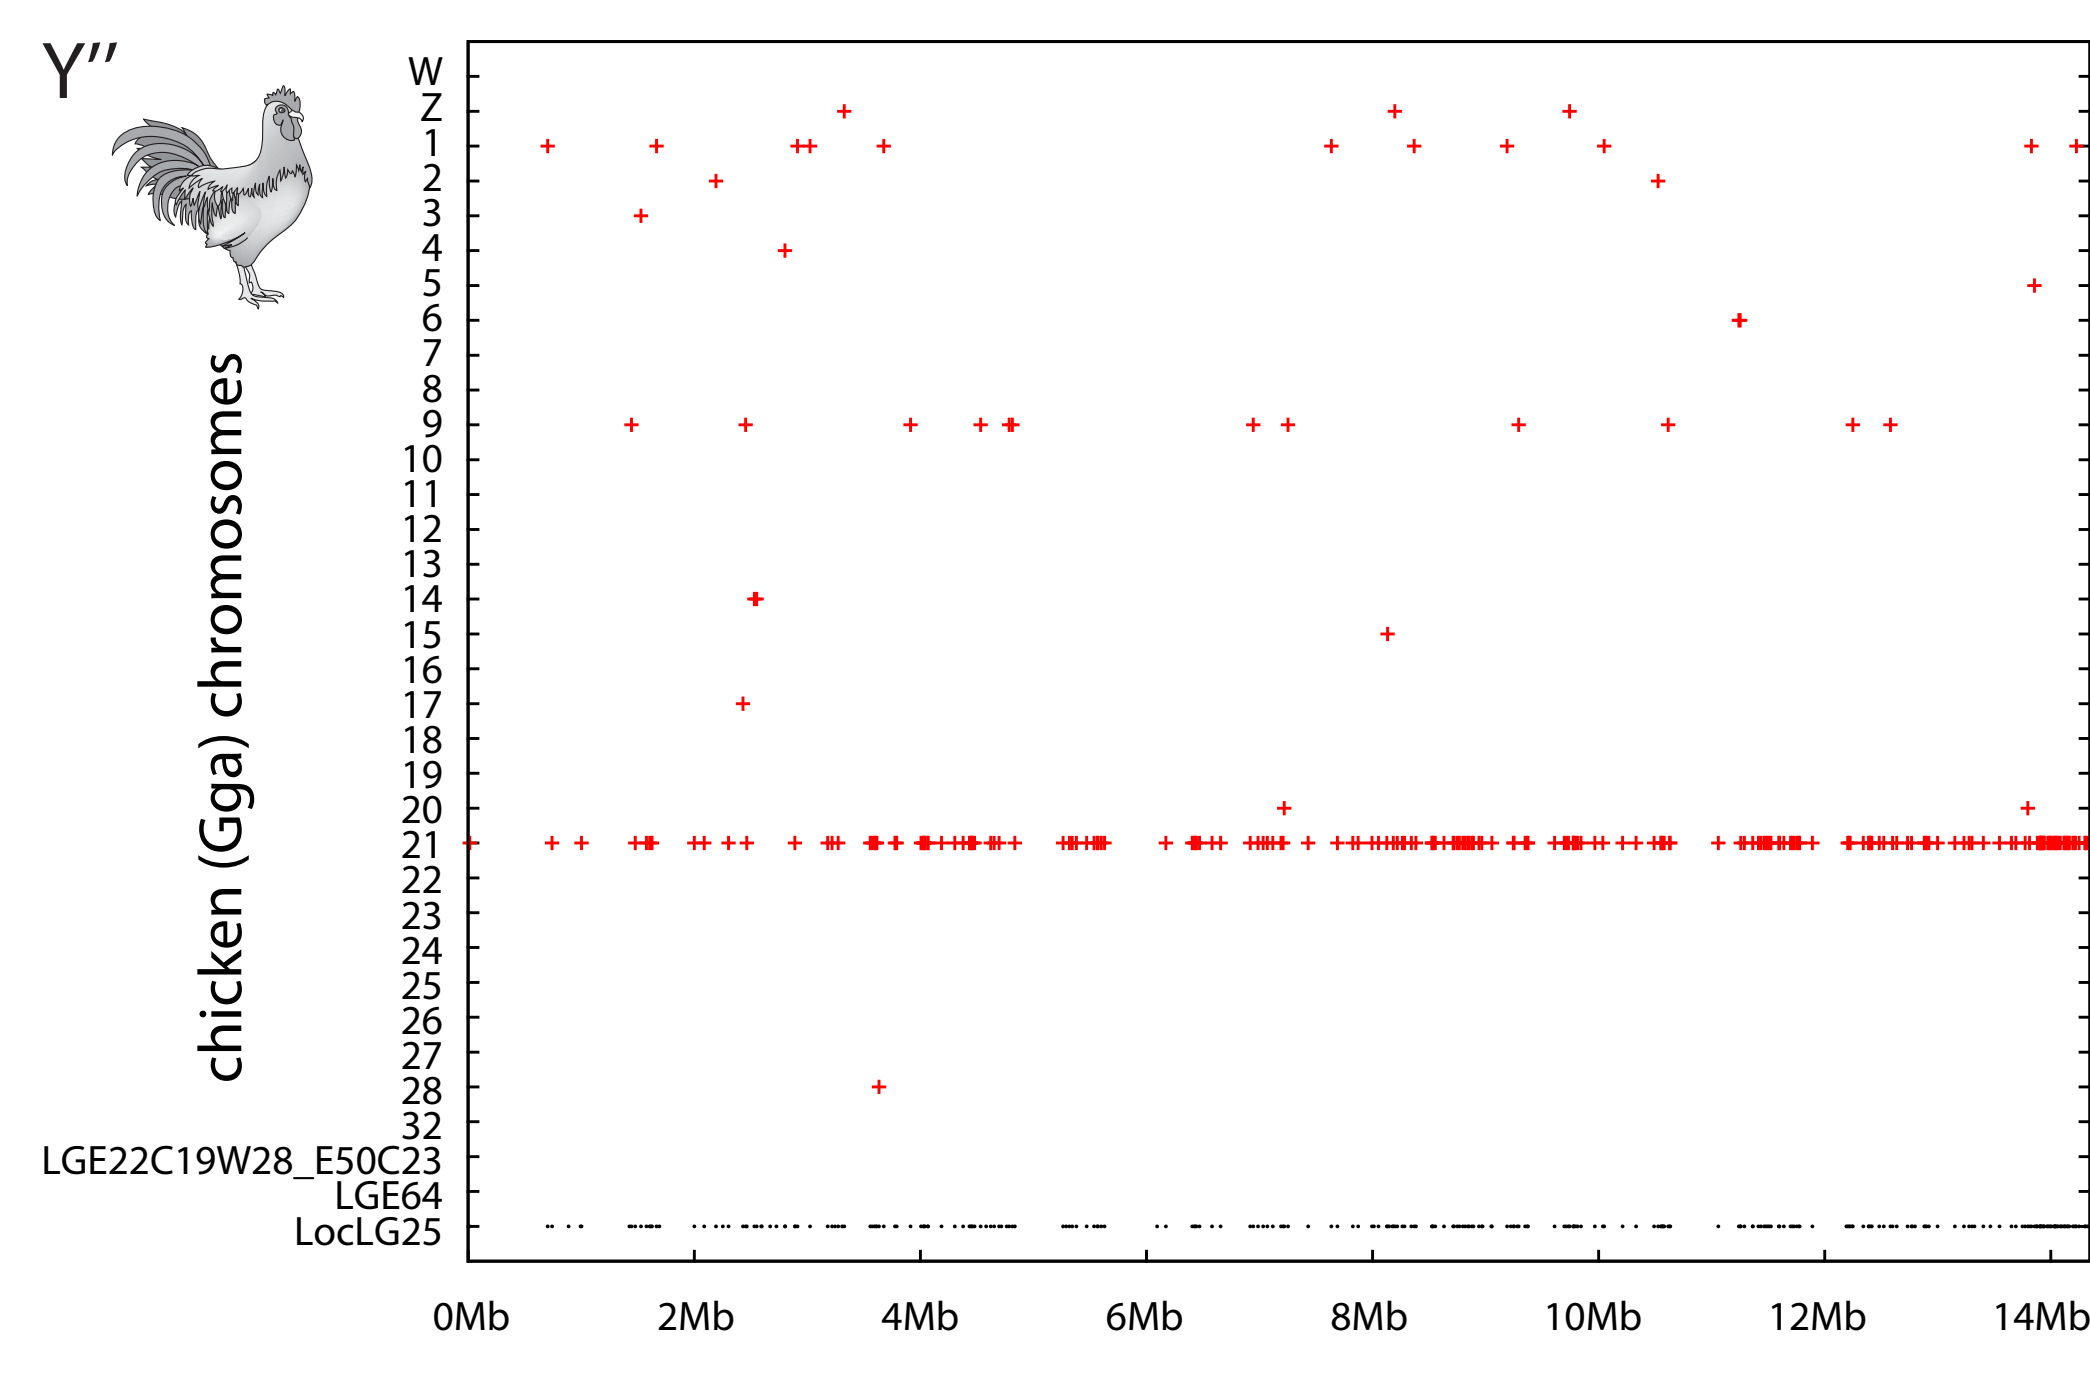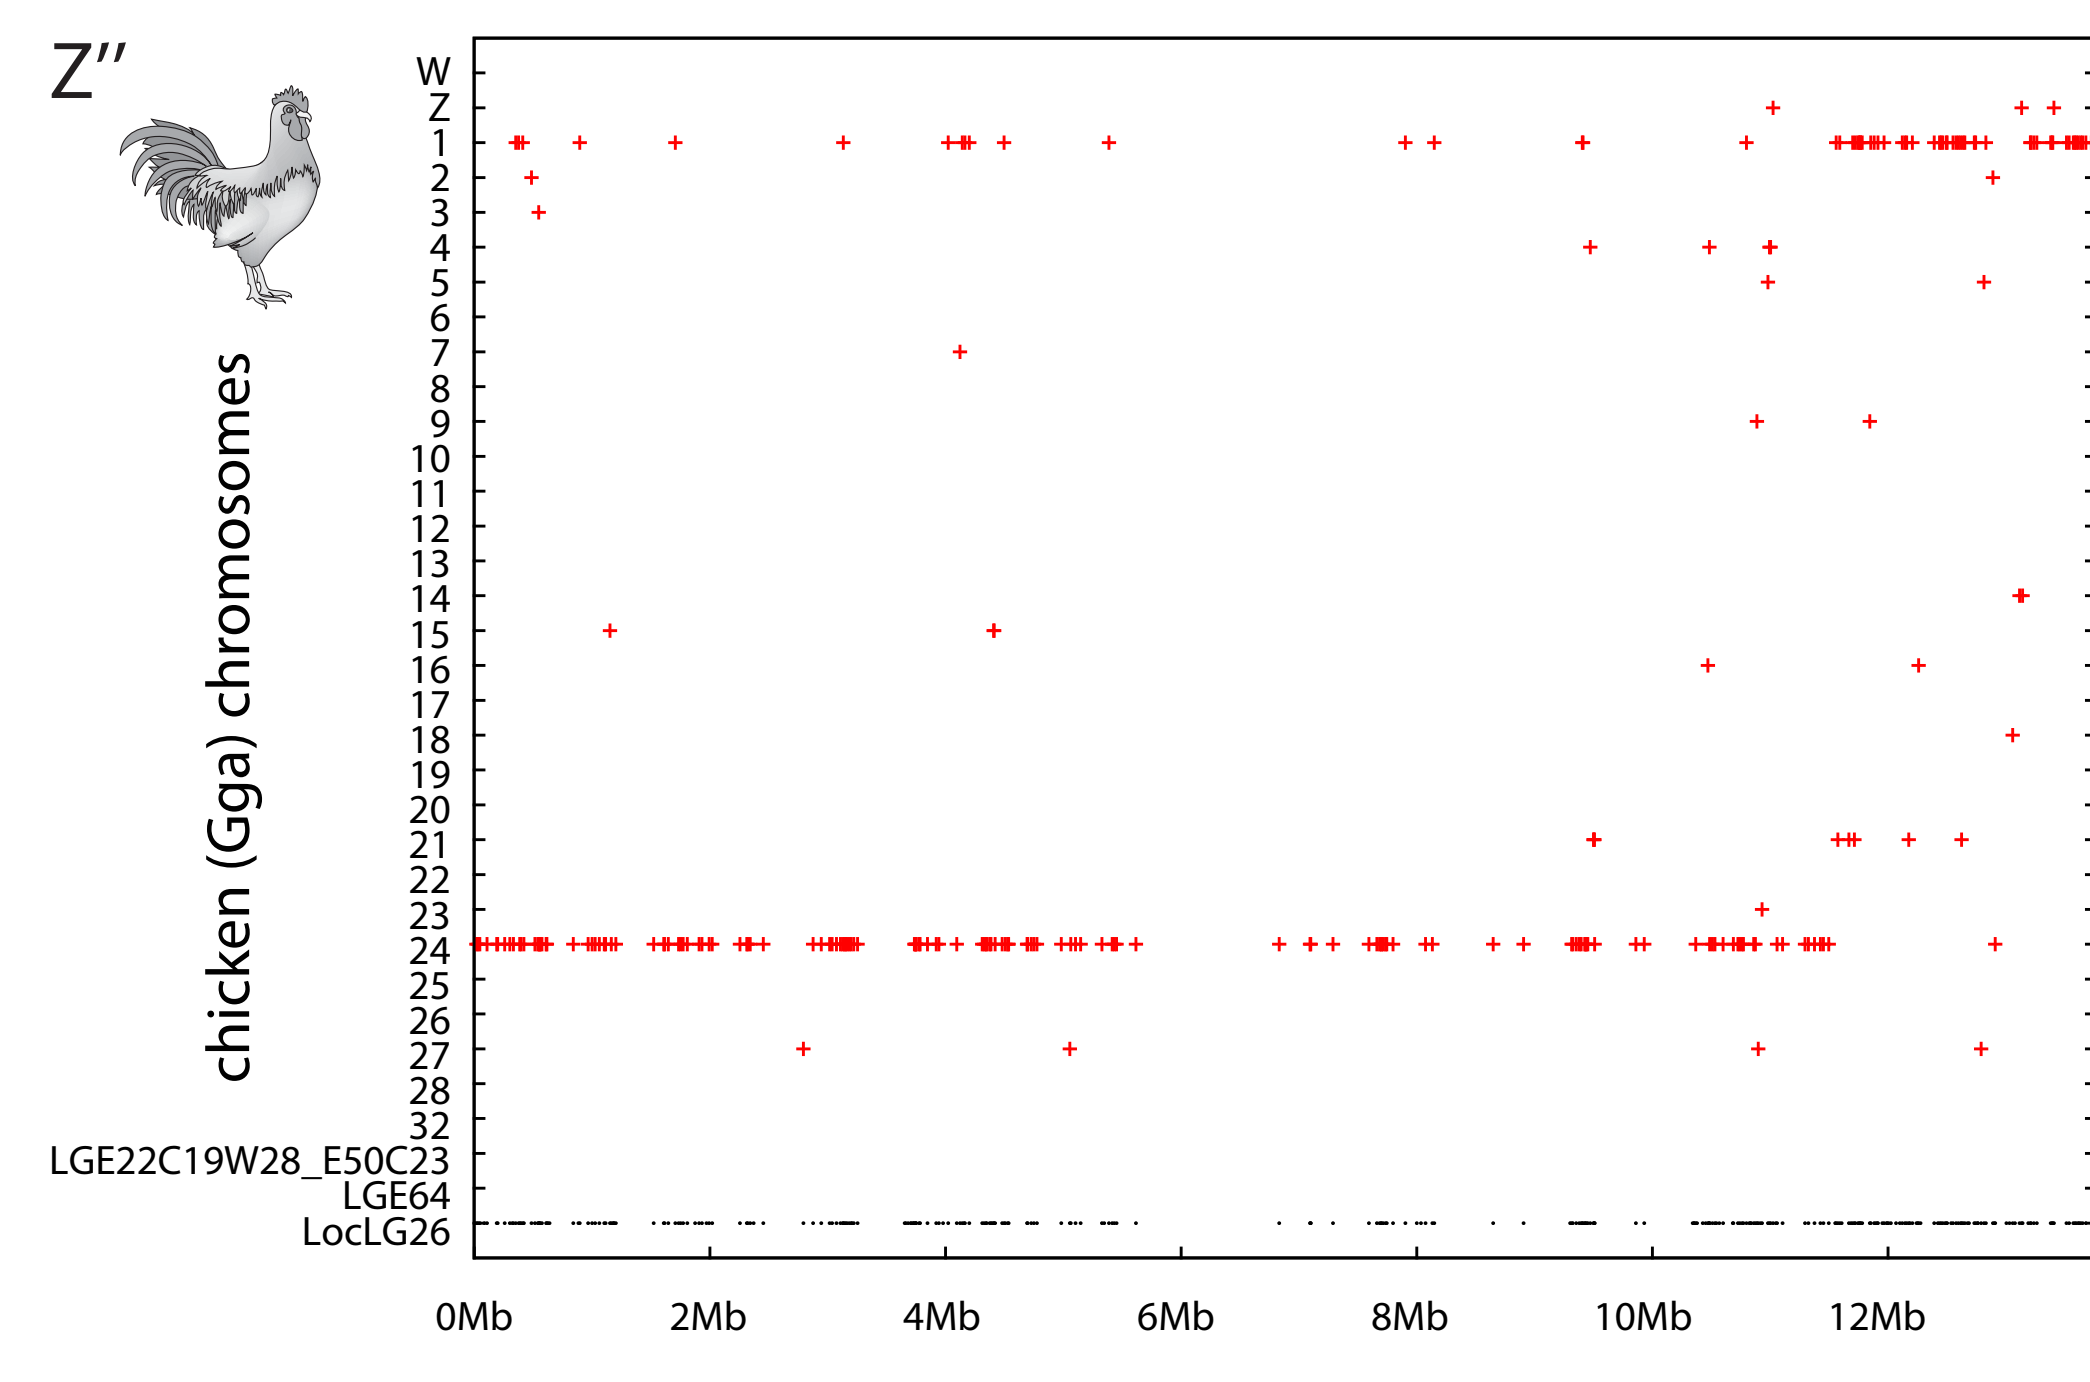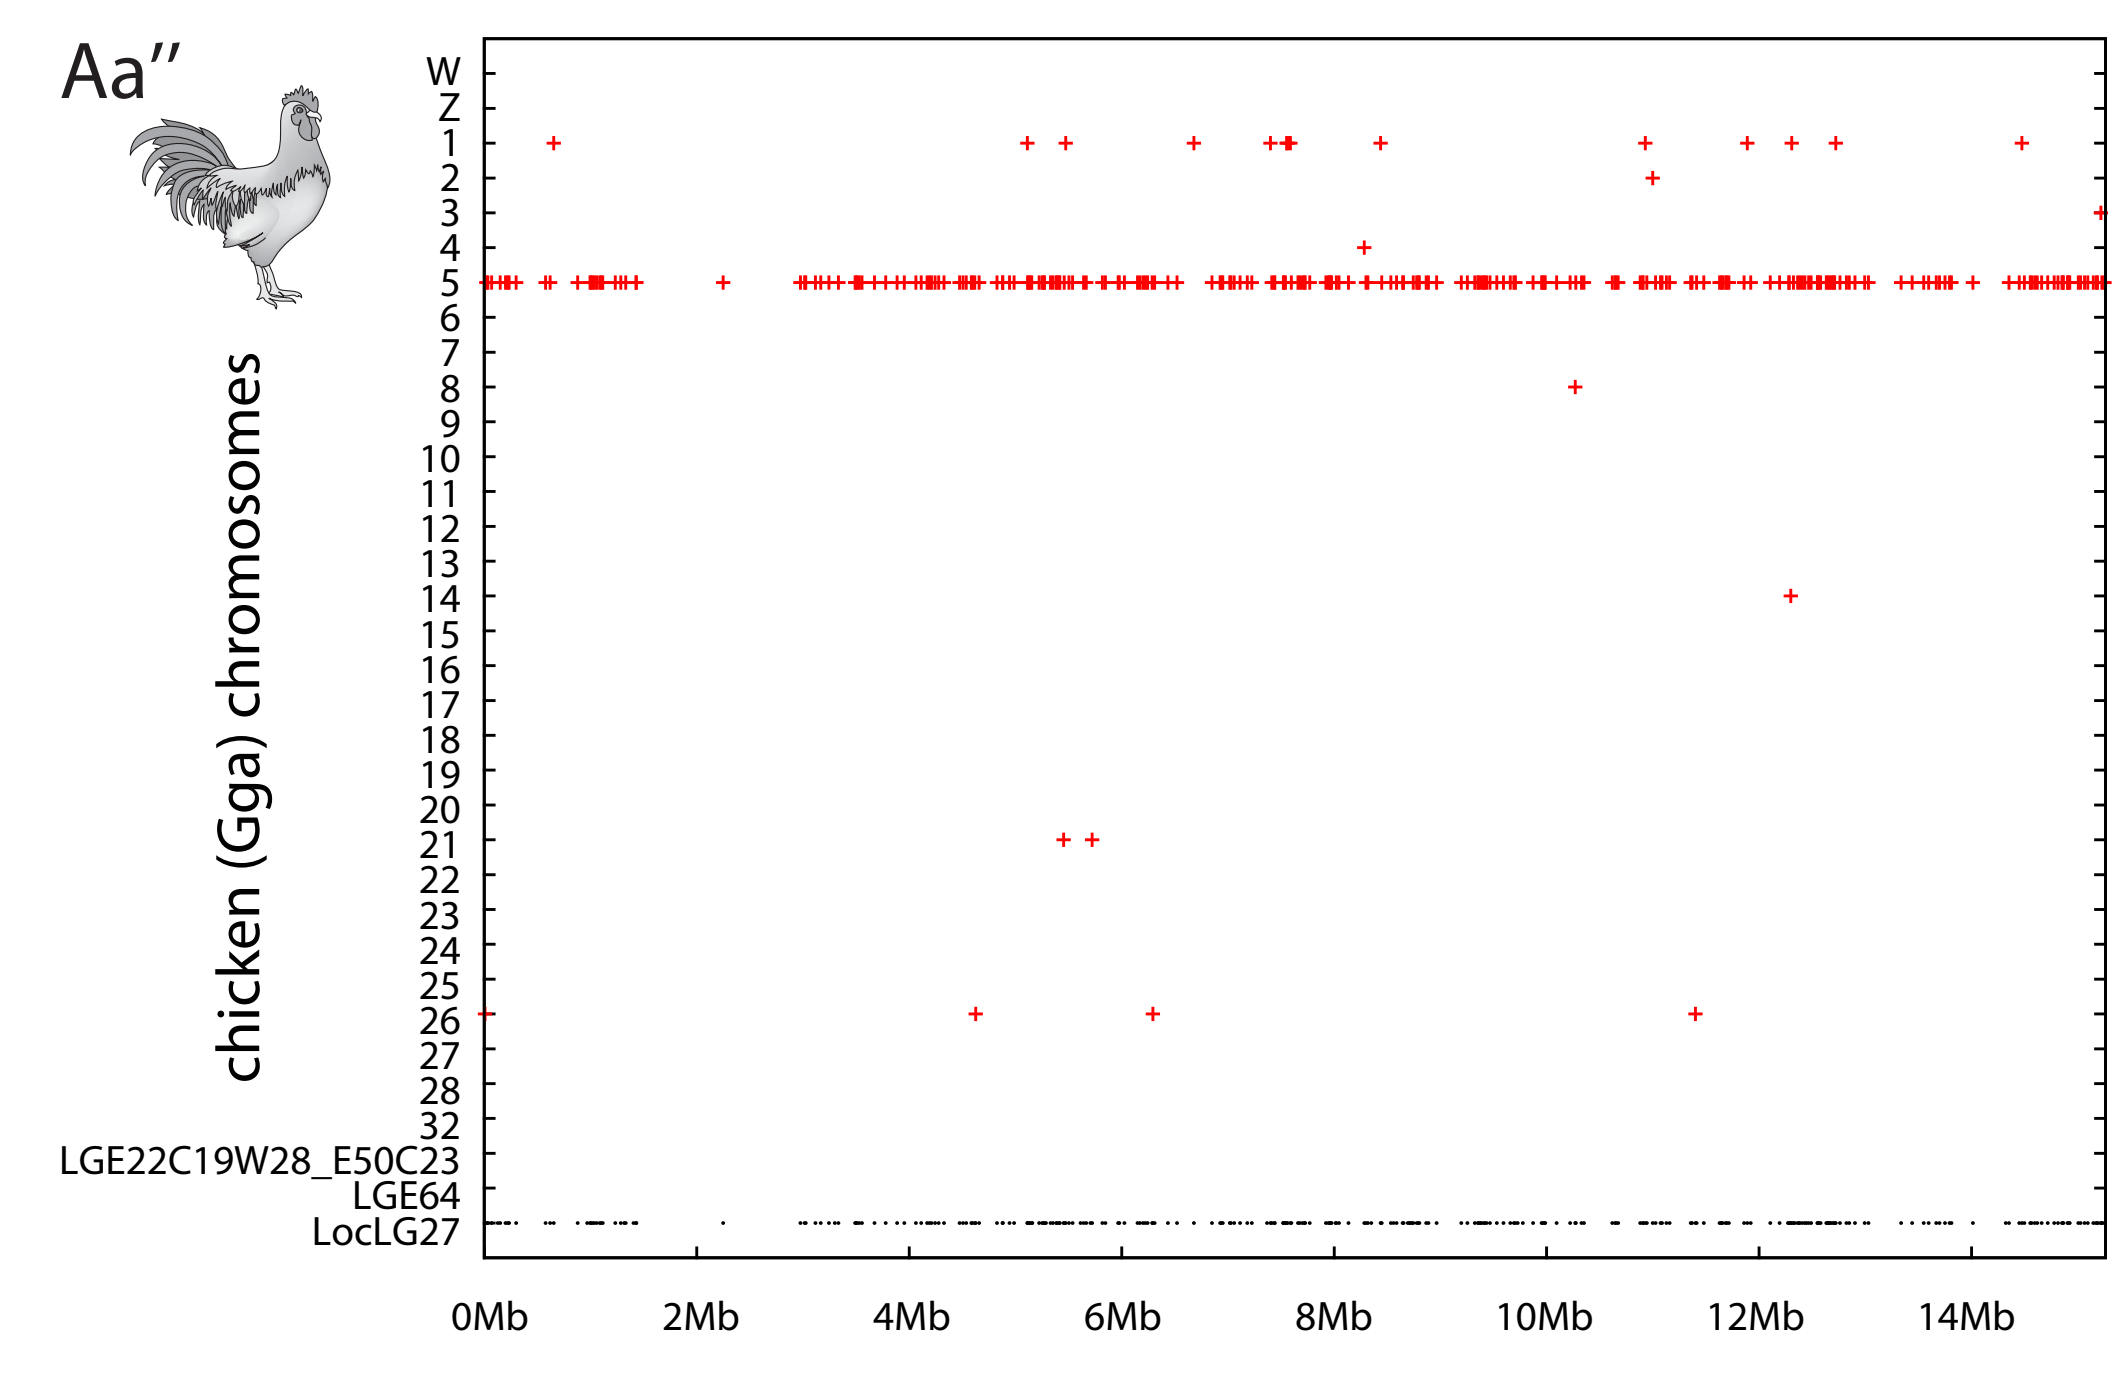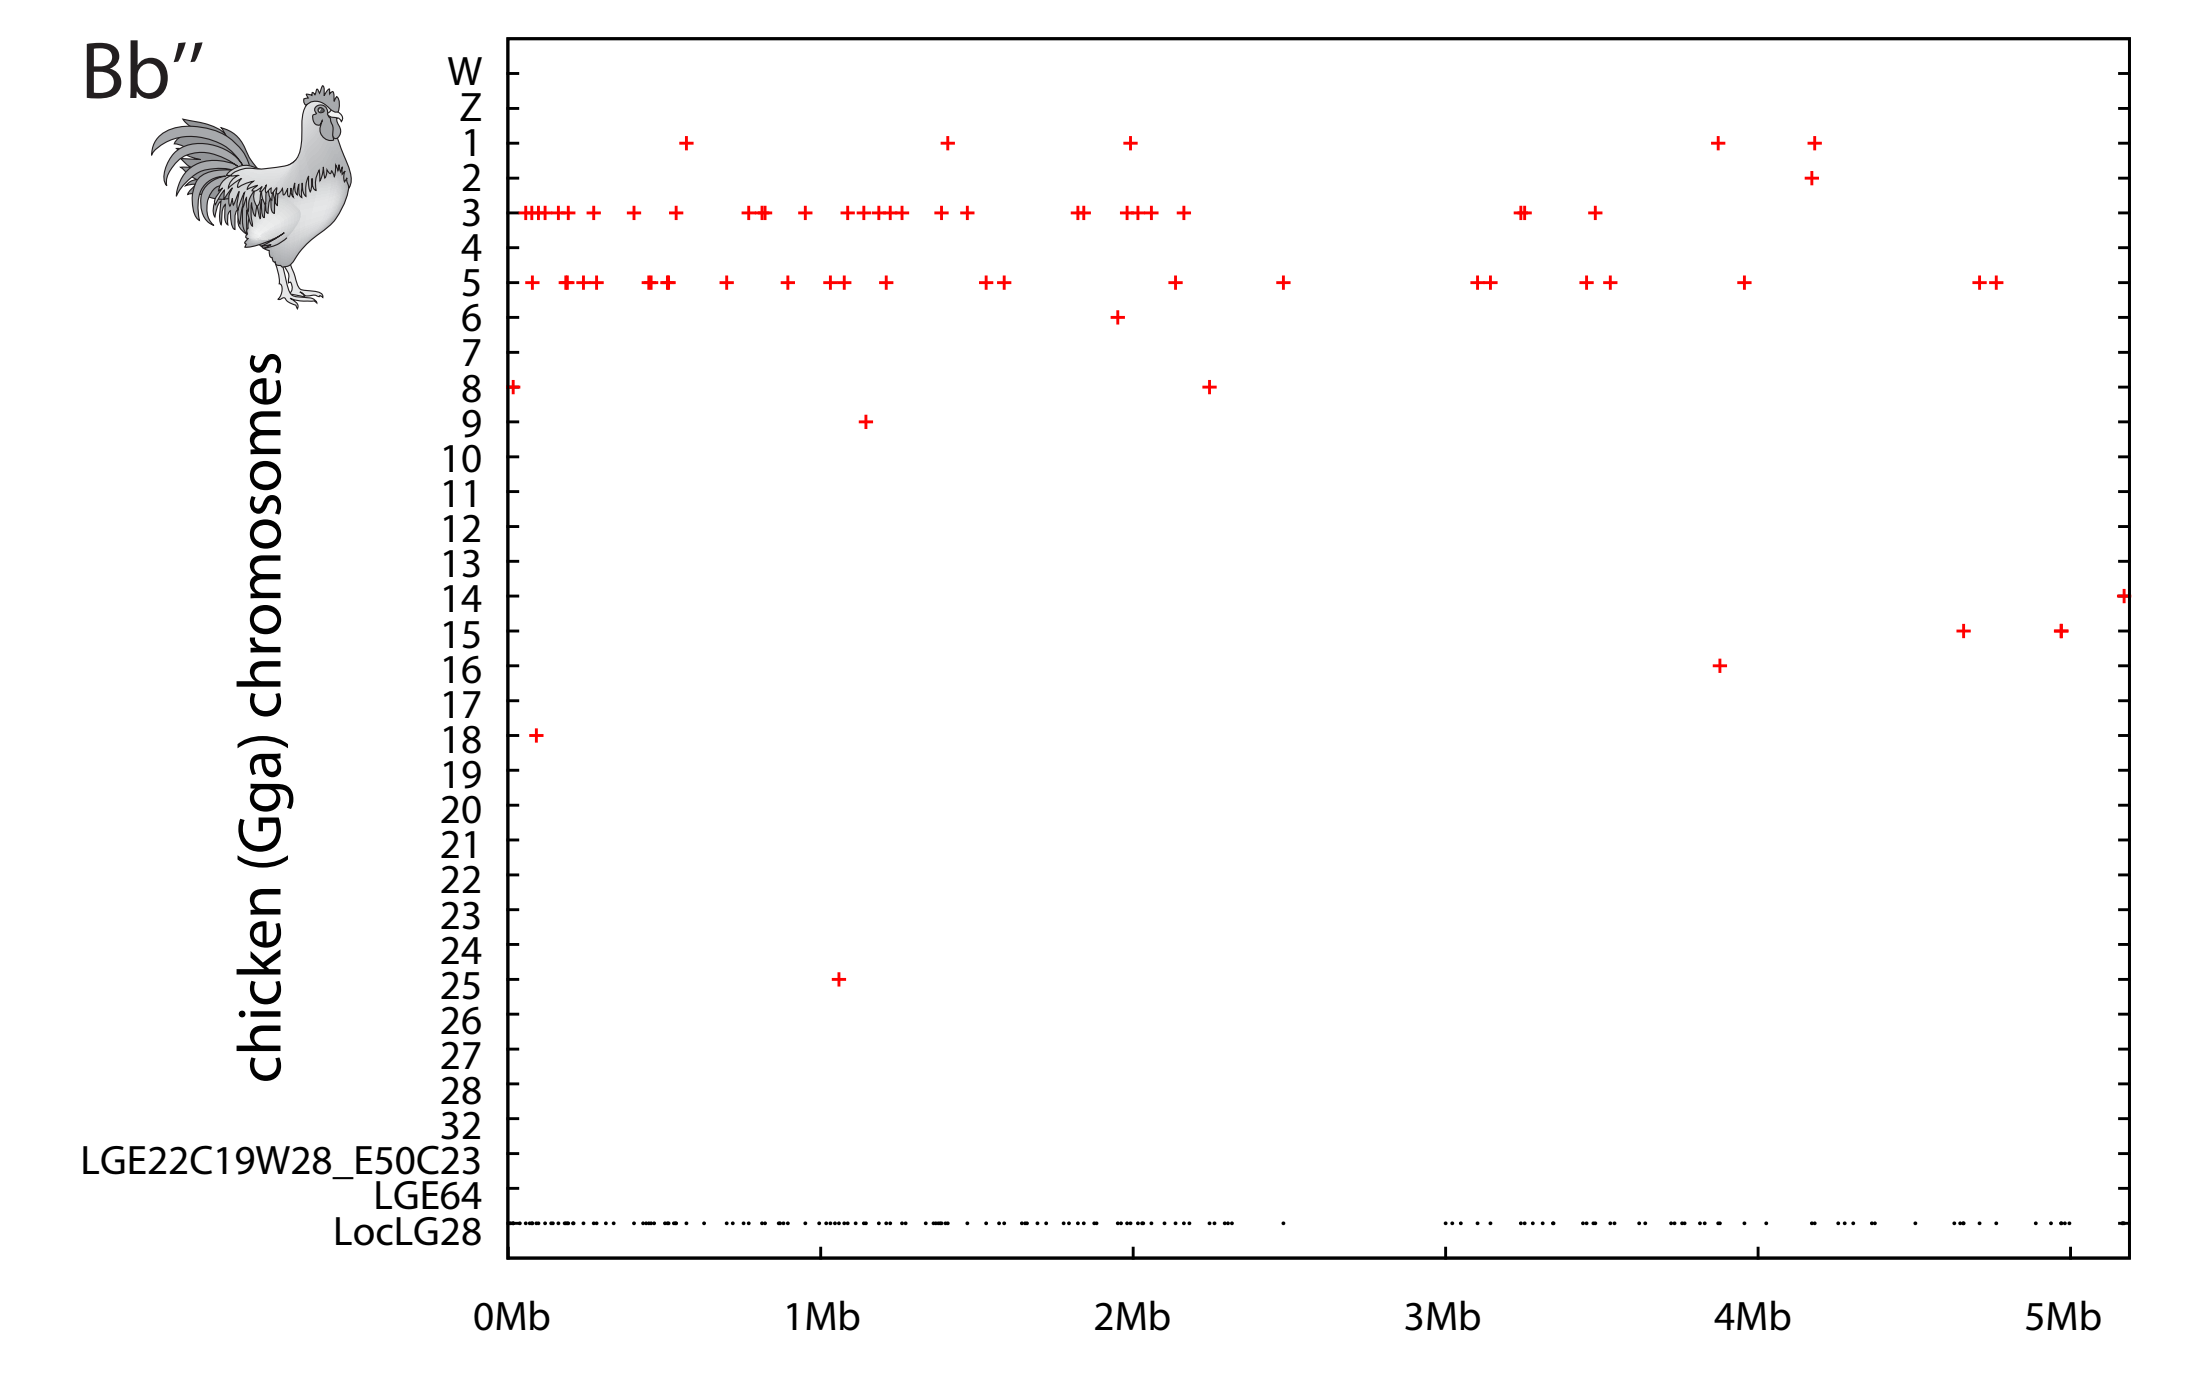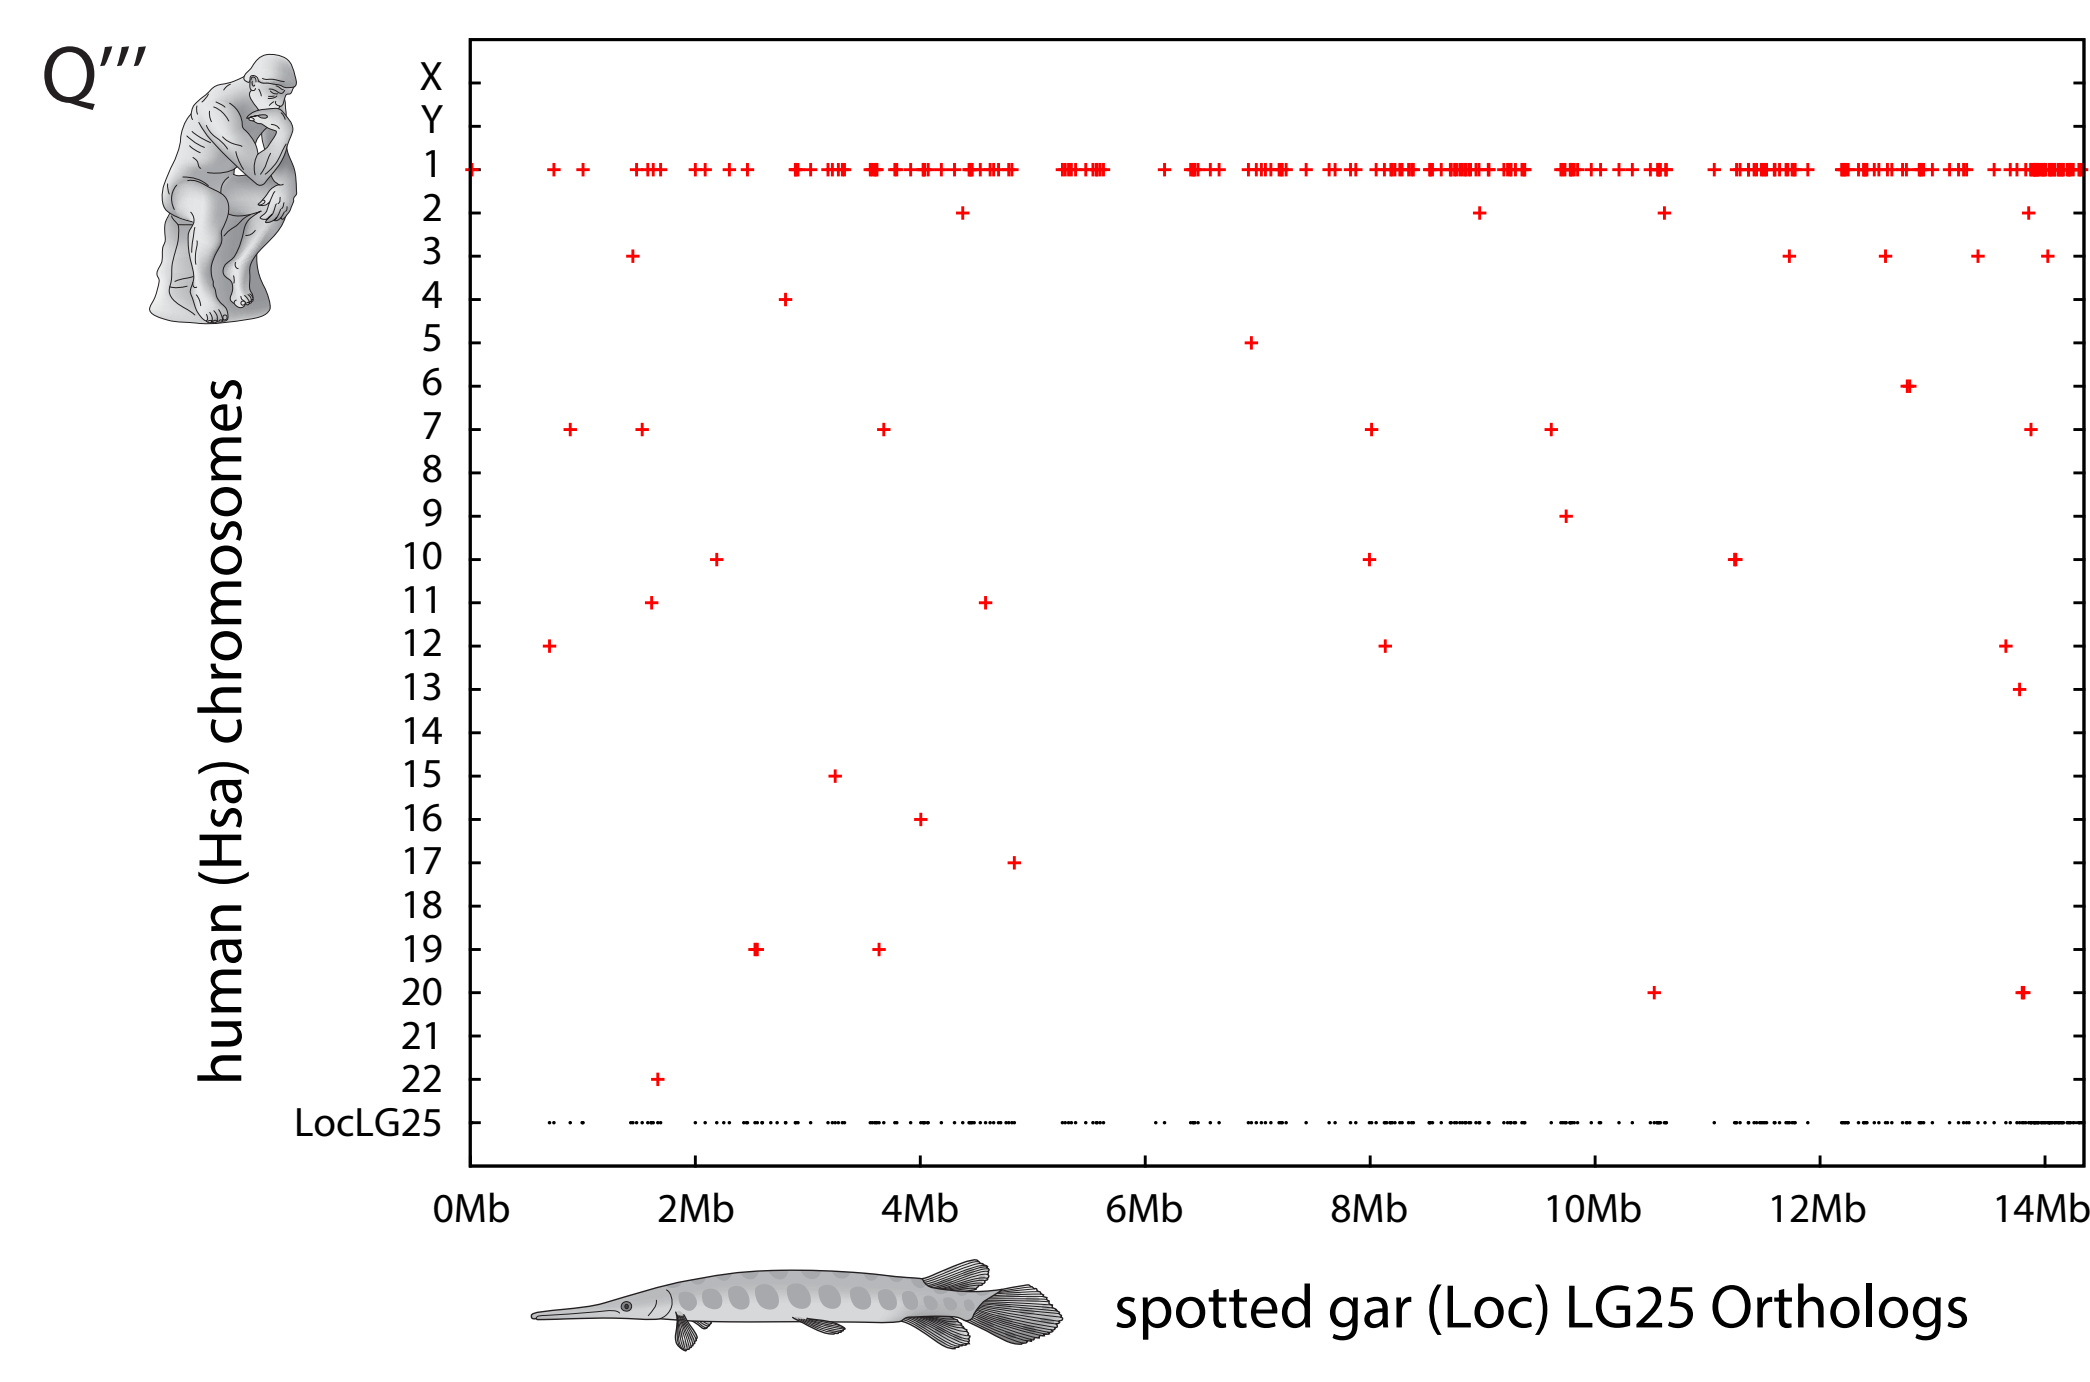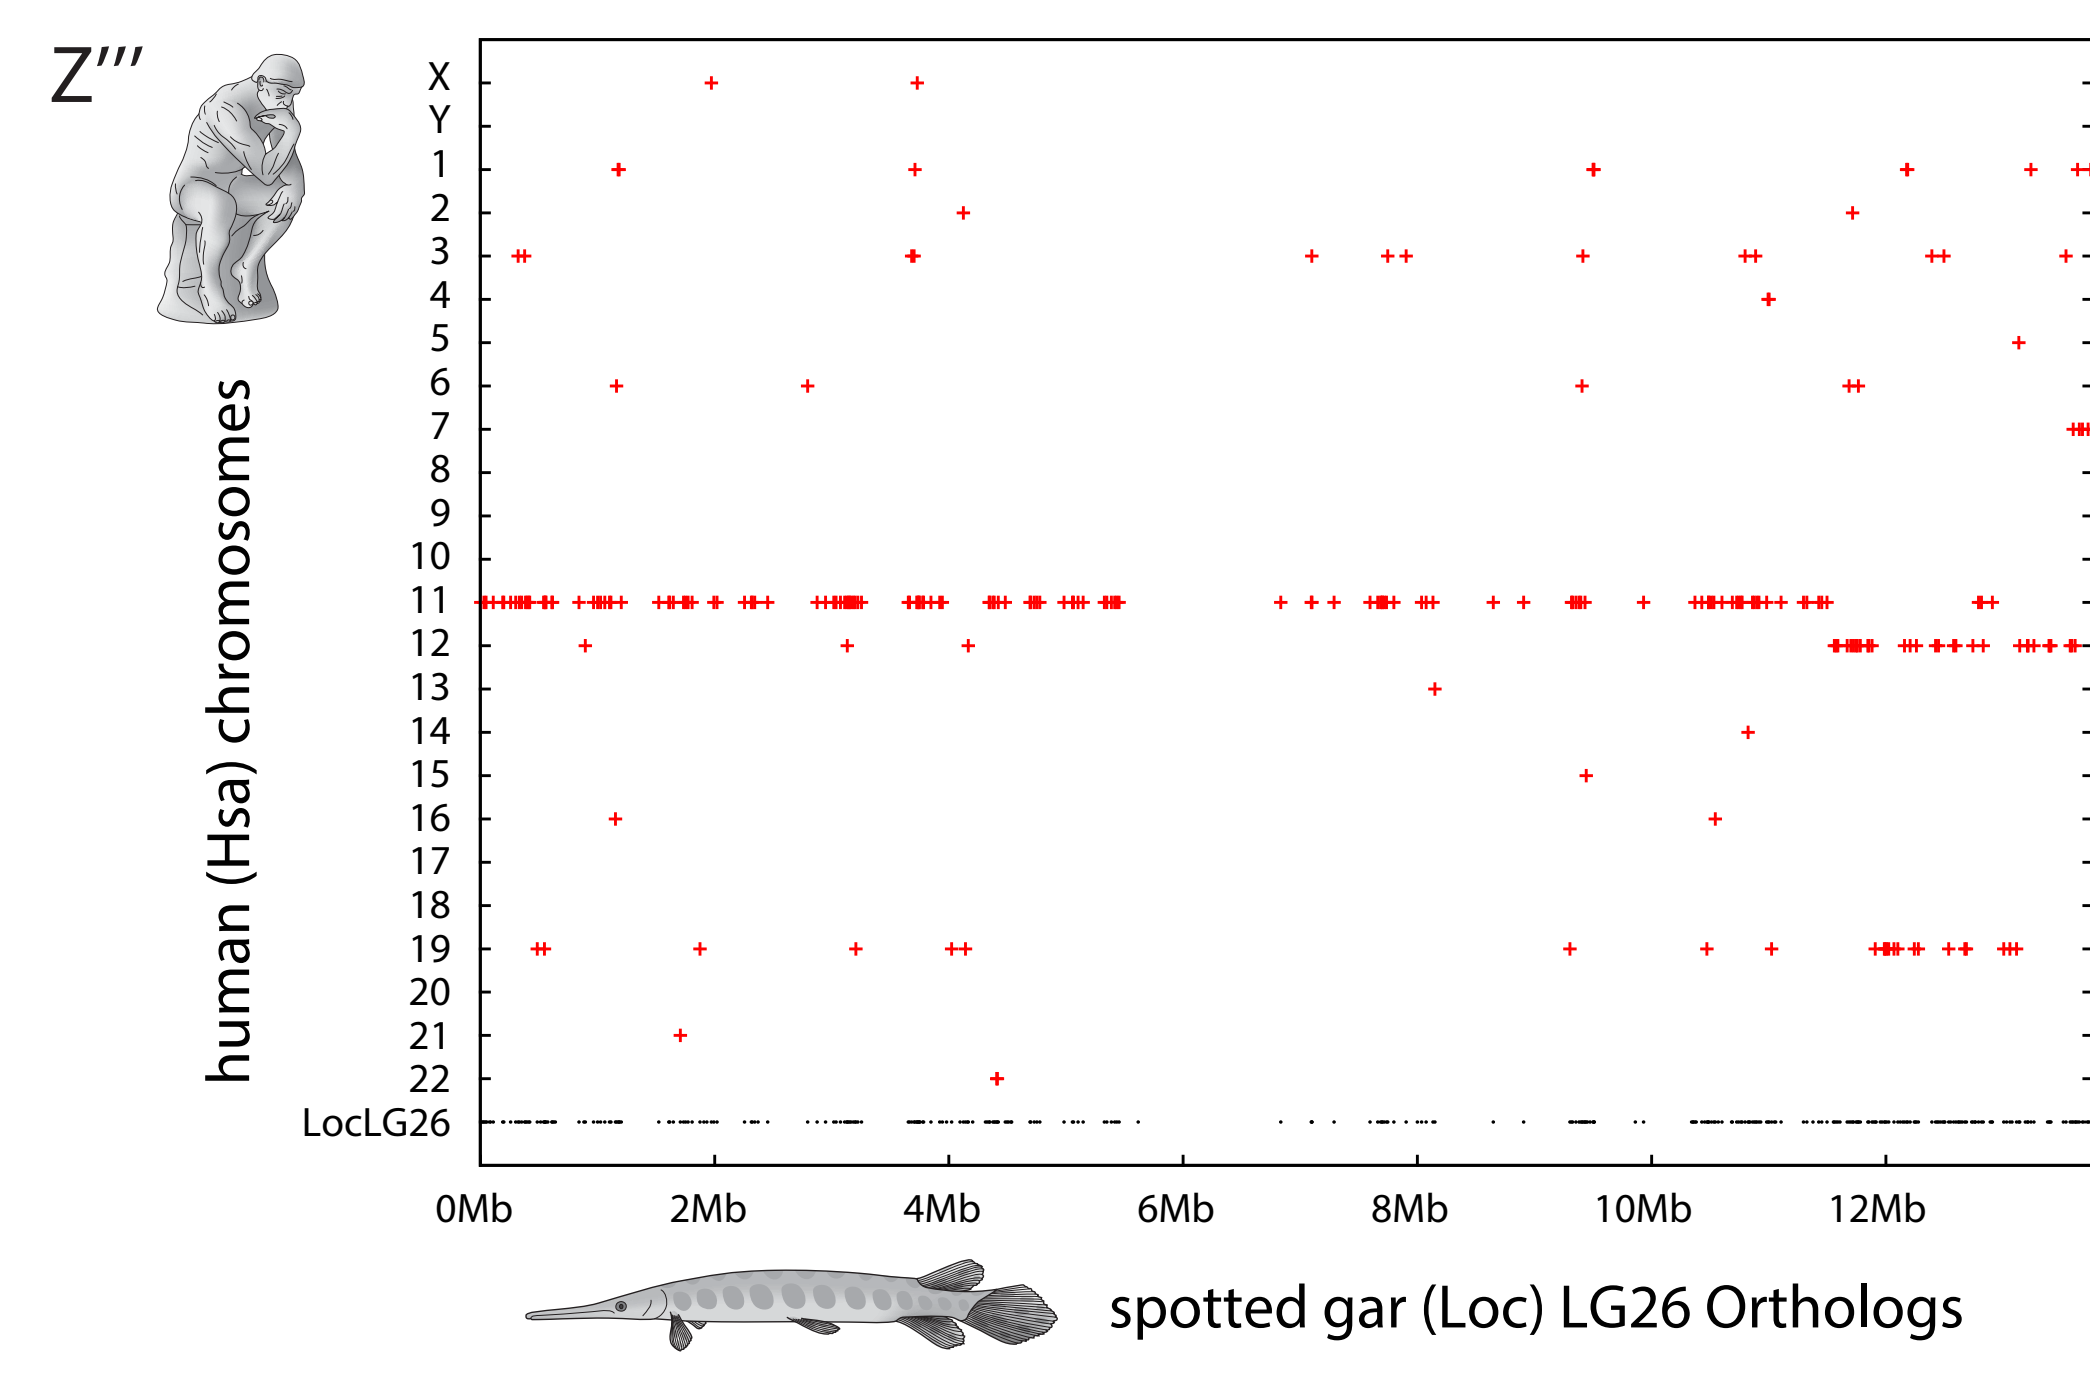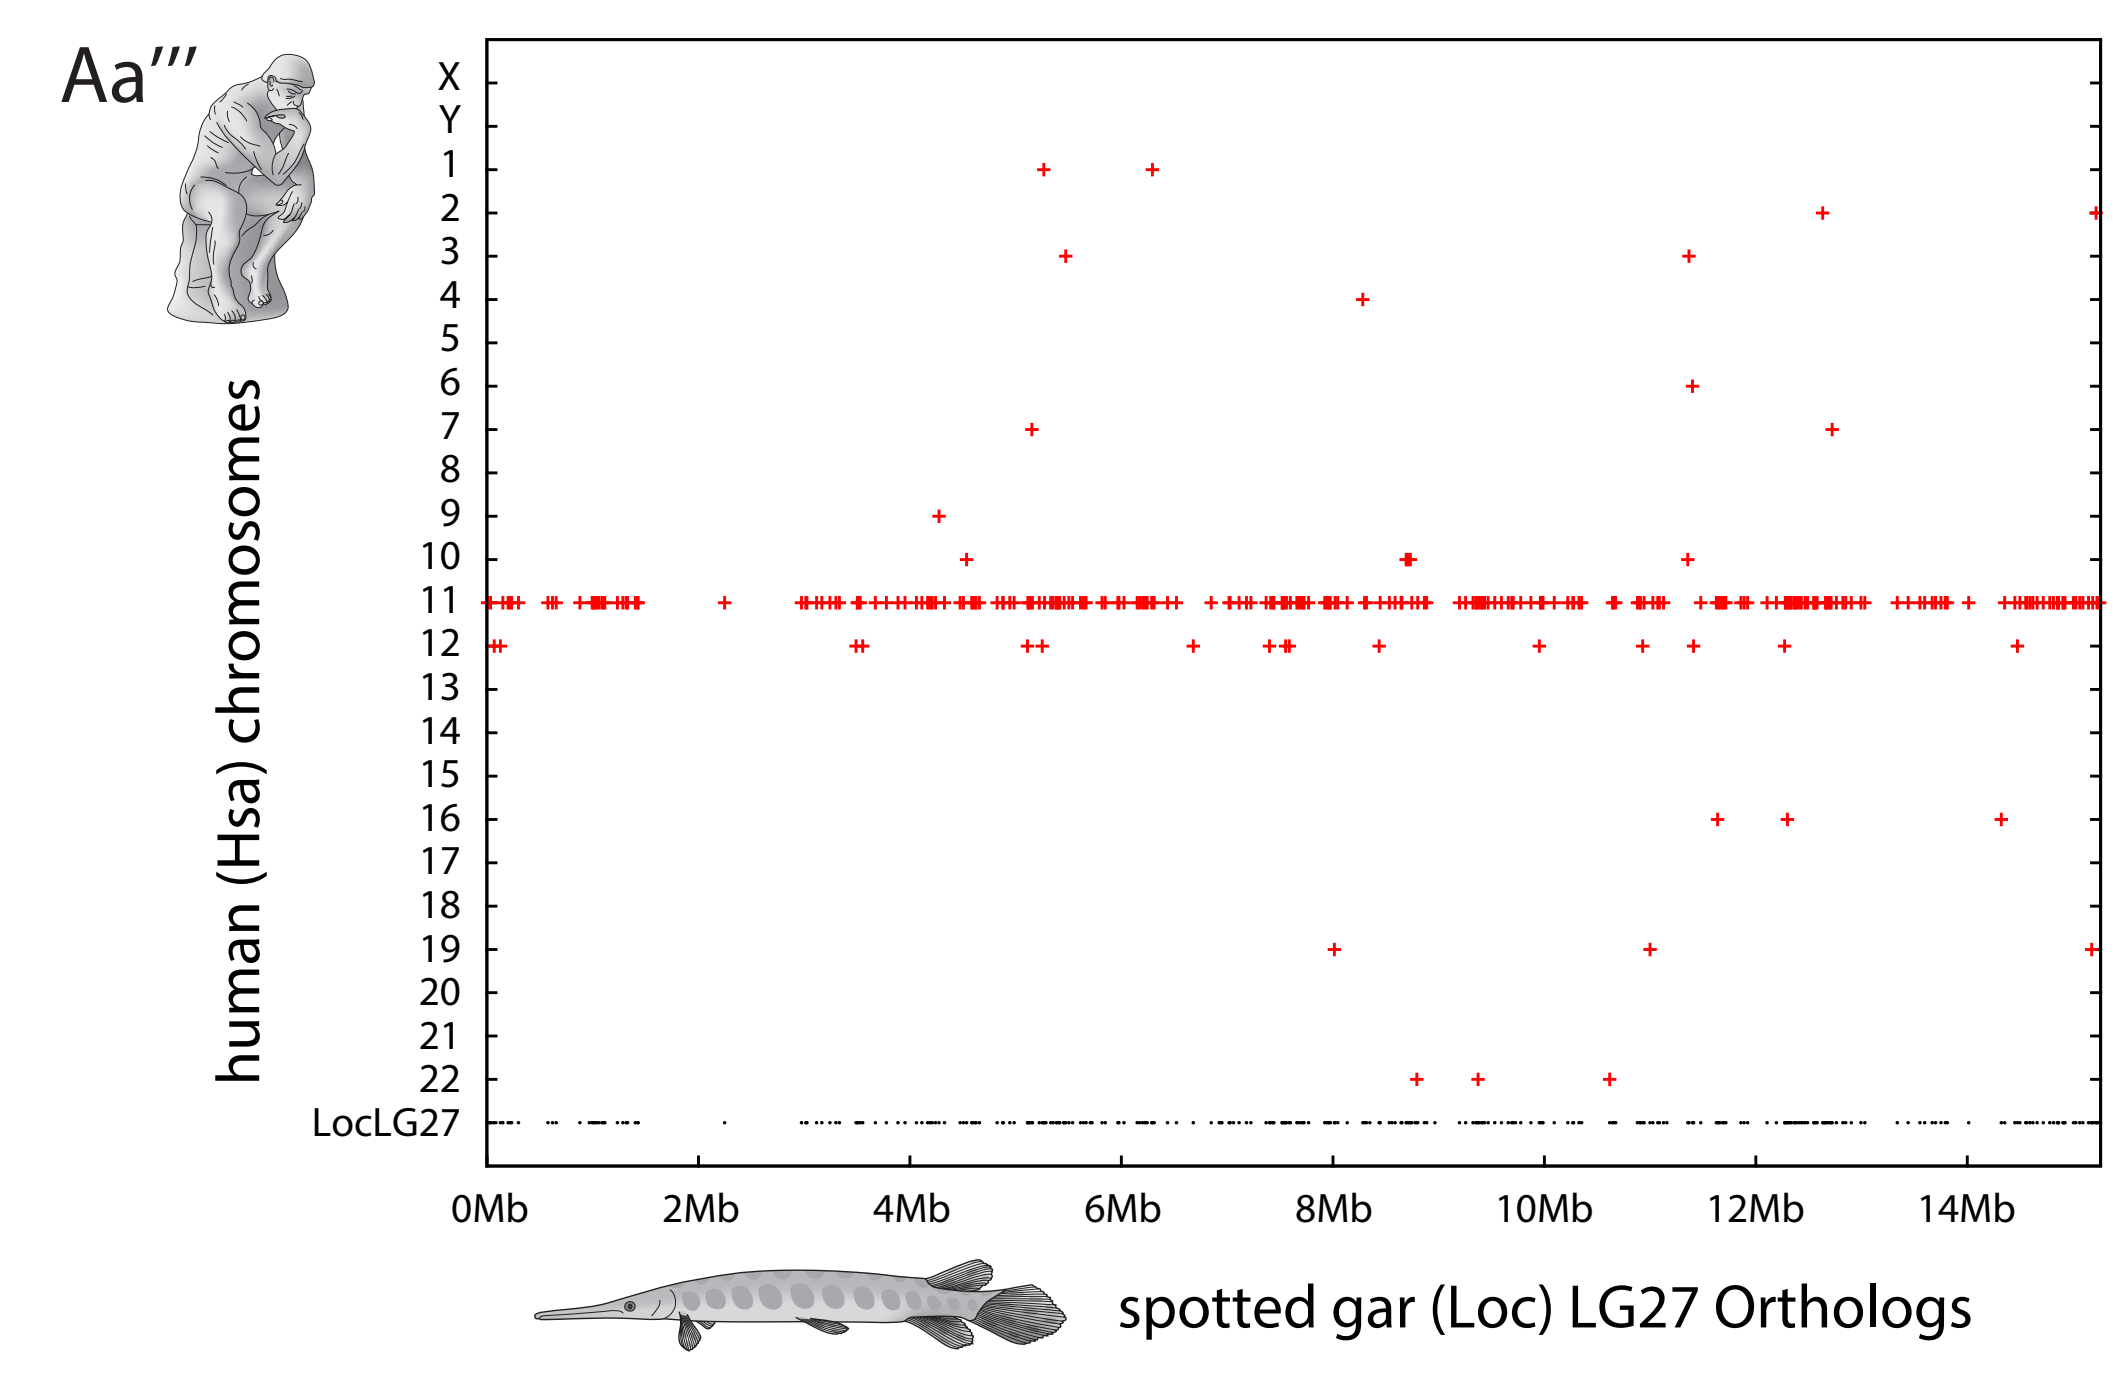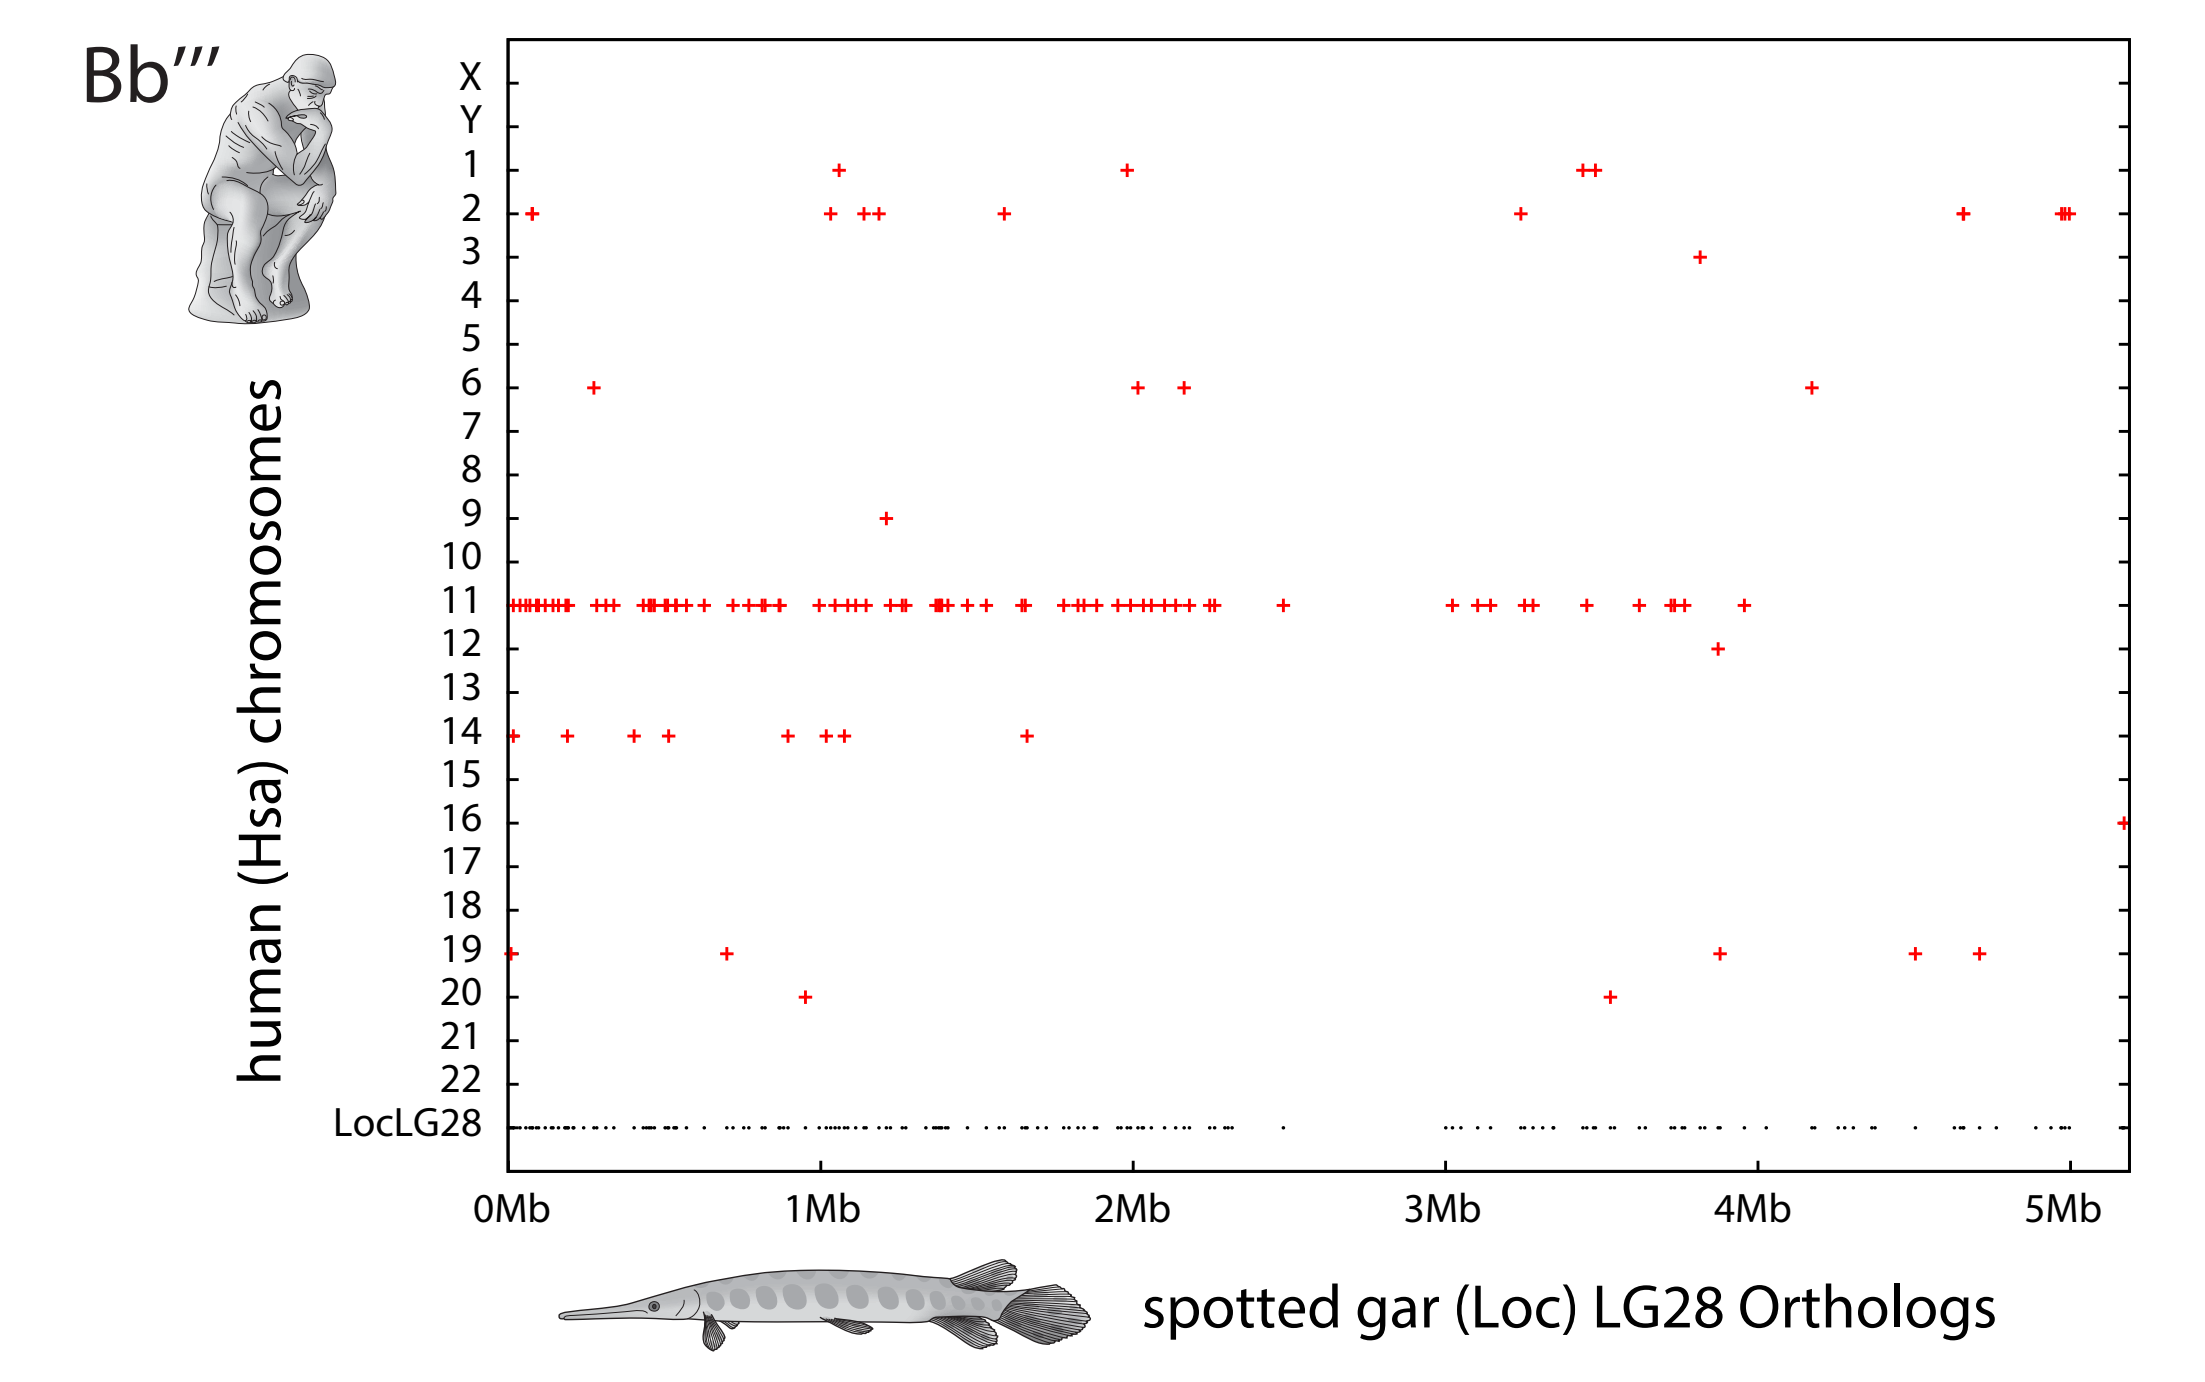

 spotted gar (Lc) LG25 Orthologs

 spotted gar (Lc) LG26 Orthologs

 spotted gar (Lc) LG27 Orthologs

 spotted gar (Lc) LG28 Orthologs
